# Supplementary material for: The impacts of moisture transport on drifting snow sublimation in the saltation layer
Source: Copernicus journal article supplement (doi:10.5194/acp-16-7523-2016), 2016-06-20
Supplement: Supplementary file 1 [file Data in Figure 1.xlsx]

## Sheet: Snow Particle Number Density
The data of the profile of snow particle number density at the steady state for three wind force levels in Figure 1
		u*=0.4 m/s		u*=0.5 m/s
Snow particle number density (108 m-3)	Height (cm)	Snow particle number density (108 m-3)	Height (cm)	Snow particle number density (108 m-3)	Height (cm)
1.68	0.003	1.84	0.003	3.6	0.003
1.46667	0.00425	2.77333	0.00425	3.41333	0.00425
1.344	0.0055	2.528	0.0055	3.36	0.0055
1.30286	0.00675	2.60571	0.00675	3.04	0.00675
1.30667	0.008	2.47111	0.008	2.95111	0.008
1.31636	0.00925	2.28364	0.00925	2.69818	0.00925
1.29846	0.0105	2.28923	0.0105	2.59692	0.0105
1.28	0.01175	2.24	0.01175	2.57067	0.01175
1.28941	0.013	2.17412	0.013	2.50824	0.013
1.25053	0.01425	2.13474	0.01425	2.55579	0.01425
1.26476	0.0155	2.08381	0.0155	2.48381	0.0155
1.29043	0.01675	2.0313	0.01675	2.40348	0.01675
1.2544	0.018	2.0192	0.018	2.3904	0.018
1.2237	0.01925	2.01185	0.01925	2.35556	0.01925
1.22759	0.0205	1.95862	0.0205	2.34207	0.0205
1.21806	0.02175	1.9071	0.02175	2.32516	0.02175
1.19742	0.023	1.9071	0.023	2.26581	0.023
1.18968	0.02425	1.84774	0.02425	2.20903	0.02425
1.19484	0.0255	1.77548	0.0255	2.16258	0.0255
1.19226	0.02675	1.75742	0.02675	2.12387	0.02675
1.17935	0.028	1.72645	0.028	2.07742	0.028
1.17161	0.02925	1.67742	0.02925	2.06968	0.02925
1.16387	0.0305	1.66194	0.0305	2.04903	0.0305
1.15355	0.03175	1.64645	0.03175	2.03613	0.03175
1.15355	0.033	1.64645	0.033	2.00516	0.033
1.13548	0.03425	1.65419	0.03425	2.03355	0.03425
1.11484	0.0355	1.67742	0.0355	2.00774	0.0355
1.1329	0.03675	1.62581	0.03675	2	0.03675
1.10968	0.038	1.59484	0.038	1.98968	0.038
1.13548	0.03925	1.58194	0.03925	1.94323	0.03925
1.1071	0.0405	1.56645	0.0405	1.91742	0.0405
1.12	0.04175	1.55355	0.04175	1.88387	0.04175
1.08645	0.043	1.54323	0.043	1.87871	0.043
1.08645	0.04425	1.54581	0.04425	1.83484	0.04425
1.09677	0.0455	1.53032	0.0455	1.79871	0.0455
1.09161	0.04675	1.50452	0.04675	1.78839	0.04675
1.0529	0.048	1.49936	0.048	1.77032	0.048
1.02968	0.04925	1.49677	0.04925	1.81419	0.04925
0.99871	0.0505	1.52258	0.0505	1.78839	0.0505
1.00387	0.05175	1.50452	0.05175	1.76516	0.05175
1.00129	0.053	1.50452	0.053	1.77032	0.053
1.00387	0.05425	1.48903	0.05425	1.76	0.05425
1.00645	0.0555	1.47613	0.0555	1.73936	0.0555
0.99097	0.05675	1.48129	0.05675	1.70581	0.05675
0.99871	0.058	1.47871	0.058	1.72129	0.058
1.00387	0.05925	1.48129	0.05925	1.71097	0.05925
0.99355	0.0605	1.48645	0.0605	1.66194	0.0605
0.98839	0.06175	1.46581	0.06175	1.65419	0.06175
0.99097	0.063	1.46323	0.063	1.65161	0.063
0.97032	0.06425	1.44516	0.06425	1.64387	0.06425
0.9729	0.0655	1.44	0.0655	1.61806	0.0655
0.98064	0.06675	1.42452	0.06675	1.61806	0.06675
0.97548	0.068	1.40903	0.068	1.60774	0.068
1.00387	0.06925	1.40387	0.06925	1.60774	0.06925
0.99871	0.0705	1.37806	0.0705	1.59484	0.0705
0.99613	0.07175	1.36516	0.07175	1.57161	0.07175
0.98323	0.073	1.34968	0.073	1.54064	0.073
0.98581	0.07425	1.31871	0.07425	1.54839	0.07425
0.96	0.0755	1.33419	0.0755	1.55871	0.0755
0.96774	0.07675	1.33935	0.07675	1.5329	0.07675
0.95484	0.078	1.34452	0.078	1.51742	0.078
0.96	0.07925	1.33161	0.07925	1.52774	0.07925
0.9471	0.0805	1.33419	0.0805	1.55613	0.0805
0.95742	0.08175	1.31355	0.08175	1.53806	0.08175
0.9471	0.083	1.30581	0.083	1.52	0.083
0.92129	0.08425	1.30064	0.08425	1.49419	0.08425
0.91871	0.0855	1.30581	0.0855	1.48645	0.0855
0.92903	0.08675	1.30581	0.08675	1.48645	0.08675
0.93419	0.088	1.30064	0.088	1.43484	0.088
0.92645	0.08925	1.26194	0.08925	1.44516	0.08925
0.91355	0.0905	1.26968	0.0905	1.43742	0.0905
0.91613	0.09175	1.25935	0.09175	1.40645	0.09175
0.90581	0.093	1.24903	0.093	1.38839	0.093
0.90323	0.09425	1.23097	0.09425	1.39613	0.09425
0.88516	0.0955	1.21806	0.0955	1.38064	0.0955
0.86452	0.09675	1.19484	0.09675	1.34194	0.09675
0.85161	0.098	1.19484	0.098	1.34194	0.098
0.85935	0.09925	1.17161	0.09925	1.36258	0.09925
0.84903	0.1005	1.17419	0.1005	1.36258	0.1005
0.84129	0.10175	1.17419	0.10175	1.36516	0.10175
0.84903	0.103	1.20258	0.103	1.36	0.103
0.83355	0.10425	1.22323	0.10425	1.35484	0.10425
0.83097	0.1055	1.23871	0.1055	1.31355	0.1055
0.82064	0.10675	1.23097	0.10675	1.30581	0.10675
0.78968	0.108	1.20258	0.108	1.28774	0.108
0.8	0.10925	1.21548	0.10925	1.26452	0.10925
0.7871	0.1105	1.23097	0.1105	1.28	0.1105
0.7871	0.11175	1.22581	0.11175	1.28774	0.11175
0.80516	0.113	1.22581	0.113	1.27226	0.113
0.80258	0.11425	1.23613	0.11425	1.25677	0.11425
0.79742	0.1155	1.23613	0.1155	1.24903	0.1155
0.78968	0.11675	1.22581	0.11675	1.2671	0.11675
0.80774	0.118	1.21548	0.118	1.26194	0.118
0.7871	0.11925	1.22064	0.11925	1.25677	0.11925
0.77161	0.1205	1.22323	0.1205	1.25419	0.1205
0.78194	0.12175	1.21032	0.12175	1.2671	0.12175
0.79226	0.123	1.20516	0.123	1.26194	0.123
0.79742	0.12425	1.2	0.12425	1.25161	0.12425
0.79484	0.1255	1.2	0.1255	1.25161	0.1255
0.79742	0.12675	1.20516	0.12675	1.25677	0.12675
0.80516	0.128	1.20258	0.128	1.25677	0.128
0.8129	0.12925	1.17419	0.12925	1.24645	0.12925
0.82064	0.1305	1.16645	0.1305	1.22839	0.1305
0.82581	0.13175	1.15097	0.13175	1.21032	0.13175
0.82581	0.133	1.15613	0.133	1.20516	0.133
0.84129	0.13425	1.16129	0.13425	1.2129	0.13425
0.85161	0.1355	1.1871	0.1355	1.22064	0.1355
0.84903	0.13675	1.19484	0.13675	1.22581	0.13675
0.85419	0.138	1.1871	0.138	1.2129	0.138
0.85935	0.13925	1.17419	0.13925	1.22064	0.13925
0.85419	0.1405	1.15871	0.1405	1.2129	0.1405
0.84387	0.14175	1.14839	0.14175	1.20516	0.14175
0.82839	0.143	1.12774	0.143	1.20774	0.143
0.84129	0.14425	1.1329	0.14425	1.23097	0.14425
0.84645	0.1455	1.13806	0.1455	1.22839	0.1455
0.83355	0.14675	1.13548	0.14675	1.22064	0.14675
0.82839	0.148	1.1071	0.148	1.22064	0.148
0.81548	0.14925	1.07871	0.14925	1.22839	0.14925
0.80774	0.1505	1.06323	0.1505	1.24903	0.1505
0.78968	0.15175	1.07355	0.15175	1.23355	0.15175
0.79484	0.153	1.04258	0.153	1.22839	0.153
0.78968	0.15425	1.0271	0.15425	1.23097	0.15425
0.79484	0.1555	1.01935	0.1555	1.21806	0.1555
0.77935	0.15675	1.02968	0.15675	1.23355	0.15675
0.7871	0.158	1.02968	0.158	1.2129	0.158
0.78452	0.15925	1.02968	0.15925	1.1871	0.15925
0.77419	0.1605	1.02968	0.1605	1.17161	0.1605
0.78194	0.16175	1.00903	0.16175	1.17935	0.16175
0.76903	0.163	0.99355	0.163	1.17677	0.163
0.77935	0.16425	0.98064	0.16425	1.17419	0.16425
0.77419	0.1655	0.94968	0.1655	1.15613	0.1655
0.75355	0.16675	0.92903	0.16675	1.13806	0.16675
0.74064	0.168	0.91871	0.168	1.11742	0.168
0.72774	0.16925	0.91355	0.16925	1.11742	0.16925
0.72774	0.17049	0.90839	0.17049	1.12774	0.17049
0.71484	0.17174	0.90323	0.17174	1.14581	0.17174
0.70452	0.17299	0.91355	0.17299	1.14581	0.17299
0.70194	0.17424	0.87742	0.17424	1.14581	0.17424
0.7071	0.17549	0.86194	0.17549	1.13548	0.17549
0.69677	0.17674	0.87484	0.17674	1.13806	0.17674
0.7071	0.17799	0.88258	0.17799	1.11226	0.17799
0.68903	0.17924	0.89032	0.17924	1.09677	0.17924
0.68645	0.18049	0.88	0.18049	1.09677	0.18049
0.69161	0.18174	0.87484	0.18174	1.09161	0.18174
0.68645	0.18299	0.85161	0.18299	1.08387	0.18299
0.68387	0.18424	0.86968	0.18424	1.08387	0.18424
0.68387	0.18549	0.86968	0.18549	1.08129	0.18549
0.67871	0.18674	0.88	0.18674	1.06839	0.18674
0.69677	0.18799	0.89806	0.18799	1.05032	0.18799
0.70968	0.18924	0.90064	0.18924	1.02194	0.18924
0.71226	0.19049	0.89548	0.19049	1.0271	0.19049
0.71226	0.19174	0.90323	0.19174	1.01419	0.19174
0.7071	0.19299	0.90064	0.19299	1.01677	0.19299
0.69419	0.19424	0.88516	0.19424	1.00387	0.19424
0.69161	0.19549	0.88774	0.19549	0.98323	0.19549
0.69419	0.19674	0.89806	0.19674	0.98323	0.19674
0.69161	0.19799	0.88516	0.19799	0.99097	0.19799
0.69419	0.19924	0.8671	0.19924	0.9729	0.19924
0.67871	0.20049	0.88774	0.20049	0.98064	0.20049
0.68387	0.20174	0.88258	0.20174	0.99355	0.20174
0.66323	0.20299	0.87742	0.20299	0.98323	0.20299
0.65806	0.20424	0.8929	0.20424	1.00129	0.20424
0.67871	0.20549	0.90581	0.20549	1.00645	0.20549
0.68903	0.20674	0.92645	0.20674	1.02194	0.20674
0.68387	0.20799	0.91355	0.20799	1.02968	0.20799
0.68645	0.20924	0.93677	0.20924	1.01677	0.20924
0.69419	0.21049	0.92387	0.21049	0.99355	0.21049
0.69161	0.21174	0.90581	0.21174	0.98064	0.21174
0.68387	0.21299	0.92645	0.21299	0.98581	0.21299
0.66323	0.21424	0.92903	0.21424	0.98064	0.21424
0.6529	0.21549	0.92903	0.21549	0.96258	0.21549
0.64774	0.21674	0.90839	0.21674	0.98064	0.21674
0.64516	0.21799	0.89032	0.21799	0.99097	0.21799
0.64516	0.21924	0.88774	0.21924	0.97548	0.21924
0.65806	0.22049	0.89806	0.22049	0.96516	0.22049
0.64516	0.22174	0.88774	0.22174	0.95226	0.22174
0.64	0.22299	0.86968	0.22299	0.95484	0.22299
0.64774	0.22424	0.86452	0.22424	0.96258	0.22424
0.64258	0.22549	0.85419	0.22549	0.95226	0.22549
0.62452	0.22674	0.84903	0.22674	0.93935	0.22674
0.6271	0.22799	0.84903	0.22799	0.9471	0.22799
0.61935	0.22924	0.84387	0.22924	0.94452	0.22924
0.60645	0.23049	0.84645	0.23049	0.95742	0.23049
0.60645	0.23174	0.85677	0.23174	0.94968	0.23174
0.61161	0.23299	0.8929	0.23299	0.93161	0.23299
0.61677	0.23424	0.88774	0.23424	0.93161	0.23424
0.61677	0.23549	0.87484	0.23549	0.92903	0.23549
0.62968	0.23674	0.89548	0.23674	0.94968	0.23674
0.62194	0.23799	0.89548	0.23799	0.94968	0.23799
0.62194	0.23924	0.88774	0.23924	0.96516	0.23924
0.61677	0.24049	0.90064	0.24049	0.94968	0.24049
0.62194	0.24174	0.90581	0.24174	0.95742	0.24174
0.63484	0.24299	0.89032	0.24299	0.95484	0.24299
0.61935	0.24424	0.90323	0.24424	0.93161	0.24424
0.61161	0.24549	0.89032	0.24549	0.92903	0.24549
0.60645	0.24674	0.90064	0.24674	0.92129	0.24674
0.60387	0.24799	0.87742	0.24799	0.91097	0.24799
0.59355	0.24924	0.8929	0.24924	0.91355	0.24924
0.59871	0.25049	0.89548	0.25049	0.93161	0.25049
0.59097	0.25174	0.88258	0.25174	0.92129	0.25174
0.59613	0.25299	0.88	0.25299	0.90581	0.25299
0.58839	0.25424	0.86968	0.25424	0.91355	0.25424
0.58323	0.25549	0.87742	0.25549	0.89032	0.25549
0.58581	0.25674	0.88258	0.25674	0.88516	0.25674
0.58323	0.25799	0.88516	0.25799	0.87484	0.25799
0.5729	0.25924	0.8671	0.25924	0.87484	0.25924
0.56258	0.26049	0.86452	0.26049	0.88	0.26049
0.5729	0.26174	0.85677	0.26174	0.86968	0.26174
0.56774	0.26299	0.85677	0.26299	0.86452	0.26299
0.55484	0.26424	0.8671	0.26424	0.88	0.26424
0.57806	0.26549	0.85677	0.26549	0.88516	0.26549
0.5729	0.26674	0.83871	0.26674	0.86968	0.26674
0.58839	0.26799	0.83613	0.26799	0.85419	0.26799
0.59355	0.26924	0.82064	0.26924	0.84129	0.26924
0.59871	0.27049	0.8129	0.27049	0.83097	0.27049
0.58064	0.27174	0.78194	0.27174	0.85677	0.27174
0.58064	0.27299	0.76645	0.27299	0.84903	0.27299
0.58323	0.27424	0.76387	0.27424	0.85419	0.27424
0.57806	0.27549	0.7329	0.27549	0.84903	0.27549
0.58064	0.27674	0.74064	0.27674	0.85935	0.27674
0.57548	0.27799	0.73032	0.27799	0.84129	0.27799
0.56516	0.27924	0.72258	0.27924	0.85677	0.27924
0.57032	0.28049	0.71484	0.28049	0.84129	0.28049
0.56258	0.28174	0.73032	0.28174	0.83355	0.28174
0.56258	0.28299	0.71742	0.28299	0.84387	0.28299
0.58323	0.28424	0.71226	0.28424	0.84387	0.28424
0.58581	0.28549	0.7071	0.28549	0.86452	0.28549
0.58064	0.28674	0.70968	0.28674	0.89032	0.28674
0.58323	0.28799	0.70194	0.28799	0.8929	0.28799
0.57806	0.28924	0.7071	0.28924	0.8671	0.28924
0.57032	0.29049	0.72	0.29049	0.8671	0.29049
0.57032	0.29174	0.72774	0.29174	0.88	0.29174
0.57806	0.29299	0.7329	0.29299	0.87484	0.29299
0.57806	0.29424	0.74323	0.29424	0.8929	0.29424
0.59355	0.29549	0.74064	0.29549	0.89032	0.29549
0.60129	0.29674	0.73548	0.29674	0.89806	0.29674
0.60129	0.29799	0.73548	0.29799	0.89548	0.29799
0.60129	0.29924	0.74064	0.29924	0.87742	0.29924
0.59355	0.30049	0.73806	0.30049	0.88258	0.30049
0.60903	0.30174	0.74064	0.30174	0.87226	0.30174
0.61935	0.30299	0.73548	0.30299	0.87484	0.30299
0.59613	0.30424	0.72258	0.30424	0.87226	0.30424
0.59355	0.30549	0.73032	0.30549	0.87742	0.30549
0.58839	0.30674	0.72258	0.30674	0.89806	0.30674
0.58323	0.30799	0.70968	0.30799	0.8929	0.30799
0.58323	0.30924	0.71484	0.30924	0.8929	0.30924
0.58581	0.31049	0.71484	0.31049	0.88258	0.31049
0.58064	0.31174	0.7071	0.31174	0.88516	0.31174
0.58064	0.31299	0.70452	0.31299	0.89032	0.31299
0.57032	0.31424	0.69677	0.31424	0.88258	0.31424
0.56774	0.31549	0.69677	0.31549	0.89548	0.31549
0.56516	0.31674	0.70968	0.31674	0.87742	0.31674
0.56516	0.31799	0.71226	0.31799	0.86968	0.31799
0.54452	0.31924	0.71484	0.31924	0.87226	0.31924
0.5471	0.32049	0.70194	0.32049	0.89032	0.32049
0.53935	0.32174	0.69935	0.32174	0.89032	0.32174
0.52387	0.32299	0.69935	0.32299	0.88	0.32299
0.53161	0.32424	0.70968	0.32424	0.86194	0.32424
0.53161	0.32549	0.71484	0.32549	0.84903	0.32549
0.55226	0.32674	0.71226	0.32674	0.85935	0.32674
0.56	0.32799	0.70194	0.32799	0.85935	0.32799
0.57548	0.32924	0.67871	0.32924	0.84903	0.32924
0.57806	0.33049	0.67355	0.33049	0.84129	0.33049
0.57548	0.33174	0.65548	0.33174	0.84387	0.33174
0.56774	0.33299	0.63742	0.33299	0.82064	0.33299
0.56774	0.33424	0.63226	0.33424	0.82064	0.33424
0.56258	0.33549	0.64774	0.33549	0.8129	0.33549
0.56	0.33674	0.66581	0.33674	0.83097	0.33674
0.55742	0.33799	0.64516	0.33799	0.83871	0.33799
0.55226	0.33924	0.63484	0.33924	0.82323	0.33924
0.55484	0.34049	0.6271	0.34049	0.82839	0.34049
0.5471	0.34174	0.62968	0.34174	0.81032	0.34174
0.56258	0.34299	0.63226	0.34299	0.81032	0.34299
0.55742	0.34424	0.64774	0.34424	0.80774	0.34424
0.55742	0.34549	0.65032	0.34549	0.79742	0.34549
0.57032	0.34674	0.66839	0.34674	0.79484	0.34674
0.56774	0.34799	0.65548	0.34799	0.79484	0.34799
0.56516	0.34924	0.66323	0.34924	0.80258	0.34924
0.56516	0.35049	0.66323	0.35049	0.80516	0.35049
0.54968	0.35174	0.65548	0.35174	0.78194	0.35174
0.5471	0.35299	0.67097	0.35299	0.77677	0.35299
0.55226	0.35424	0.68387	0.35424	0.77161	0.35424
0.55484	0.35549	0.67355	0.35549	0.77419	0.35549
0.55484	0.35674	0.67097	0.35674	0.77419	0.35674
0.57032	0.35799	0.68903	0.35799	0.77935	0.35799
0.58064	0.35924	0.69677	0.35924	0.76129	0.35924
0.59097	0.36049	0.69419	0.36049	0.75871	0.36049
0.58064	0.36174	0.68903	0.36174	0.76387	0.36174
0.57806	0.36299	0.68129	0.36299	0.75871	0.36299
0.58064	0.36424	0.68645	0.36424	0.74839	0.36424
0.56516	0.36549	0.67613	0.36549	0.73032	0.36549
0.55742	0.36674	0.67355	0.36674	0.73032	0.36674
0.55226	0.36799	0.67355	0.36799	0.72516	0.36799
0.56774	0.36924	0.65548	0.36924	0.73806	0.36924
0.57548	0.37049	0.66064	0.37049	0.72774	0.37049
0.56774	0.37174	0.67871	0.37174	0.72516	0.37174
0.56	0.37299	0.67613	0.37299	0.70968	0.37299
0.57032	0.37424	0.66323	0.37424	0.71226	0.37424
0.57548	0.37549	0.6529	0.37549	0.69677	0.37549
0.58323	0.37674	0.67613	0.37674	0.68645	0.37674
0.58064	0.37799	0.68129	0.37799	0.68645	0.37799
0.56	0.37924	0.67355	0.37924	0.68387	0.37924
0.56	0.38049	0.66839	0.38049	0.67613	0.38049
0.54968	0.38174	0.67871	0.38174	0.67613	0.38174
0.56516	0.38299	0.65806	0.38299	0.66839	0.38299
0.55226	0.38424	0.67355	0.38424	0.6529	0.38424
0.5471	0.38549	0.67355	0.38549	0.66323	0.38549
0.53935	0.38674	0.68645	0.38674	0.67355	0.38674
0.54968	0.38799	0.68903	0.38799	0.66064	0.38799
0.53677	0.38924	0.67871	0.38924	0.6529	0.38924
0.54968	0.39049	0.68387	0.39049	0.66581	0.39049
0.54968	0.39174	0.67355	0.39174	0.6529	0.39174
0.53677	0.39299	0.6529	0.39299	0.62452	0.39299
0.53677	0.39424	0.64774	0.39424	0.62968	0.39424
0.54194	0.39549	0.64258	0.39549	0.60645	0.39549
0.54194	0.39674	0.61419	0.39674	0.59871	0.39674
0.54194	0.39799	0.60129	0.39799	0.59097	0.39799
0.53677	0.39924	0.60387	0.39924	0.59097	0.39924
0.53419	0.40049	0.60645	0.40049	0.58581	0.40049
0.53419	0.40174	0.59355	0.40174	0.59097	0.40174
0.52903	0.40299	0.58323	0.40299	0.59871	0.40299
0.52129	0.40424	0.57806	0.40424	0.59613	0.40424
0.52129	0.40549	0.57548	0.40549	0.60387	0.40549
0.53419	0.40674	0.58581	0.40674	0.59355	0.40674
0.51871	0.40799	0.60645	0.40799	0.56516	0.40799
0.51871	0.40924	0.60387	0.40924	0.58581	0.40924
0.51613	0.41049	0.59871	0.41049	0.58839	0.41049
0.51097	0.41174	0.59871	0.41174	0.59871	0.41174
0.49548	0.41299	0.60387	0.41299	0.59355	0.41299
0.48774	0.41424	0.58581	0.41424	0.58839	0.41424
0.48516	0.41549	0.58064	0.41549	0.61419	0.41549
0.48	0.41674	0.57548	0.41674	0.62194	0.41674
0.47226	0.41799	0.58581	0.41799	0.61935	0.41799
0.47742	0.41924	0.58323	0.41924	0.63484	0.41924
0.47742	0.42049	0.56774	0.42049	0.62968	0.42049
0.46968	0.42174	0.56	0.42174	0.63484	0.42174
0.4671	0.42299	0.53677	0.42299	0.6529	0.42299
0.46968	0.42424	0.52129	0.42424	0.64516	0.42424
0.46452	0.42549	0.50839	0.42549	0.63742	0.42549
0.46452	0.42674	0.50064	0.42674	0.6271	0.42674
0.45935	0.42799	0.50323	0.42799	0.62194	0.42799
0.45677	0.42924	0.4929	0.42924	0.61419	0.42924
0.45935	0.43049	0.50323	0.43049	0.61935	0.43049
0.46194	0.43174	0.52129	0.43174	0.64258	0.43174
0.46452	0.43299	0.51613	0.43299	0.63226	0.43299
0.46452	0.43424	0.51613	0.43424	0.63742	0.43424
0.46452	0.43549	0.52903	0.43549	0.63484	0.43549
0.45161	0.43674	0.52903	0.43674	0.65032	0.43674
0.45677	0.43799	0.53161	0.43799	0.66064	0.43799
0.44903	0.43924	0.52645	0.43924	0.65548	0.43924
0.43871	0.44049	0.53677	0.44049	0.64258	0.44049
0.44645	0.44174	0.52129	0.44174	0.64	0.44174
0.47226	0.44299	0.52903	0.44299	0.63226	0.44299
0.46452	0.44424	0.53419	0.44424	0.61935	0.44424
0.44903	0.44549	0.53161	0.44549	0.62968	0.44549
0.44387	0.44674	0.51355	0.44674	0.64	0.44674
0.43613	0.44799	0.51097	0.44799	0.61935	0.44799
0.44645	0.44924	0.50323	0.44924	0.61677	0.44924
0.43097	0.45049	0.50581	0.45049	0.61677	0.45049
0.43097	0.45174	0.49548	0.45174	0.62452	0.45174
0.43097	0.45299	0.50323	0.45299	0.62194	0.45299
0.44129	0.45424	0.50064	0.45424	0.61161	0.45424
0.47226	0.45549	0.49548	0.45549	0.60129	0.45549
0.47742	0.45674	0.48	0.45674	0.59871	0.45674
0.47226	0.45799	0.48258	0.45799	0.60903	0.45799
0.46452	0.45924	0.48	0.45924	0.61677	0.45924
0.46452	0.46049	0.49548	0.46049	0.61935	0.46049
0.4671	0.46174	0.49548	0.46174	0.6271	0.46174
0.45677	0.46299	0.50064	0.46299	0.62194	0.46299
0.46968	0.46424	0.49806	0.46424	0.62968	0.46424
0.45677	0.46549	0.49032	0.46549	0.63742	0.46549
0.46968	0.46674	0.4929	0.46674	0.64	0.46674
0.4671	0.46799	0.48774	0.46799	0.63742	0.46799
0.45935	0.46924	0.4671	0.46924	0.63484	0.46924
0.46452	0.47049	0.45419	0.47049	0.62968	0.47049
0.46968	0.47174	0.48	0.47174	0.62452	0.47174
0.46968	0.47299	0.46968	0.47299	0.6271	0.47299
0.45935	0.47424	0.47226	0.47424	0.62452	0.47424
0.45419	0.47549	0.48258	0.47549	0.61677	0.47549
0.44903	0.47674	0.47484	0.47674	0.60129	0.47674
0.4671	0.47799	0.48	0.47799	0.60387	0.47799
0.47226	0.47924	0.4671	0.47924	0.60645	0.47924
0.45677	0.48049	0.47484	0.48049	0.59871	0.48049
0.42839	0.48174	0.46968	0.48174	0.60387	0.48174
0.42581	0.48299	0.46452	0.48299	0.61677	0.48299
0.43355	0.48424	0.46968	0.48424	0.60903	0.48424
0.44645	0.48549	0.4671	0.48549	0.59871	0.48549
0.43871	0.48674	0.4671	0.48674	0.60129	0.48674
0.44129	0.48799	0.46194	0.48799	0.60645	0.48799
0.44903	0.48924	0.45935	0.48924	0.59613	0.48924
0.45935	0.49049	0.45419	0.49049	0.59613	0.49049
0.45161	0.49174	0.44645	0.49174	0.60129	0.49174
0.43613	0.49299	0.43355	0.49299	0.59613	0.49299
0.41032	0.49424	0.43871	0.49424	0.59871	0.49424
0.4129	0.49549	0.44903	0.49549	0.60387	0.49549
0.4129	0.49674	0.43871	0.49674	0.58581	0.49674
0.41032	0.49799	0.44129	0.49799	0.58581	0.49799
0.40258	0.49924	0.44129	0.49924	0.58064	0.49924
0.39226	0.50049	0.44129	0.50049	0.58323	0.50049
0.39226	0.50174	0.44129	0.50174	0.60129	0.50174
0.38968	0.50299	0.43871	0.50299	0.60645	0.50299
0.40258	0.50423	0.44387	0.50423	0.60645	0.50423
0.39742	0.50548	0.44129	0.50548	0.60387	0.50548
0.40516	0.50673	0.43871	0.50673	0.59613	0.50673
0.41806	0.50798	0.44903	0.50798	0.60645	0.50798
0.40516	0.50923	0.43355	0.50923	0.60129	0.50923
0.40258	0.51048	0.41032	0.51048	0.60903	0.51048
0.39742	0.51173	0.41032	0.51173	0.62194	0.51173
0.39226	0.51298	0.39484	0.51298	0.62452	0.51298
0.4	0.51423	0.39484	0.51423	0.63484	0.51423
0.39742	0.51548	0.38452	0.51548	0.6271	0.51548
0.39484	0.51673	0.37419	0.51673	0.62194	0.51673
0.4	0.51798	0.38968	0.51798	0.61677	0.51798
0.39742	0.51923	0.38968	0.51923	0.61677	0.51923
0.41032	0.52048	0.40516	0.52048	0.61161	0.52048
0.40516	0.52173	0.39742	0.52173	0.60903	0.52173
0.4	0.52298	0.38968	0.52298	0.60387	0.52298
0.38194	0.52423	0.4129	0.52423	0.60645	0.52423
0.3871	0.52548	0.41548	0.52548	0.59355	0.52548
0.36903	0.52673	0.42064	0.52673	0.59355	0.52673
0.35871	0.52798	0.42064	0.52798	0.60645	0.52798
0.34323	0.52923	0.42064	0.52923	0.60387	0.52923
0.34323	0.53048	0.43097	0.53048	0.59871	0.53048
0.34581	0.53173	0.43355	0.53173	0.60645	0.53173
0.34839	0.53298	0.43871	0.53298	0.59613	0.53298
0.35355	0.53423	0.43355	0.53423	0.59097	0.53423
0.35097	0.53548	0.43355	0.53548	0.58323	0.53548
0.35097	0.53673	0.42839	0.53673	0.57548	0.53673
0.34323	0.53798	0.41548	0.53798	0.58581	0.53798
0.34839	0.53923	0.41806	0.53923	0.56774	0.53923
0.34064	0.54048	0.41806	0.54048	0.54968	0.54048
0.32516	0.54173	0.41548	0.54173	0.53161	0.54173
0.32	0.54298	0.41548	0.54298	0.53935	0.54298
0.32	0.54423	0.41806	0.54423	0.53419	0.54423
0.31484	0.54548	0.43613	0.54548	0.53677	0.54548
0.3071	0.54673	0.43355	0.54673	0.53161	0.54673
0.30968	0.54798	0.44387	0.54798	0.53677	0.54798
0.30452	0.54923	0.43871	0.54923	0.53161	0.54923
0.3071	0.55048	0.45419	0.55048	0.52387	0.55048
0.31226	0.55173	0.45677	0.55173	0.53677	0.55173
0.30452	0.55298	0.44129	0.55298	0.51097	0.55298
0.3071	0.55423	0.44387	0.55423	0.52645	0.55423
0.3071	0.55548	0.44645	0.55548	0.5471	0.55548
0.29419	0.55673	0.43097	0.55673	0.54968	0.55673
0.29677	0.55798	0.43355	0.55798	0.54968	0.55798
0.27871	0.55923	0.44387	0.55923	0.55226	0.55923
0.28129	0.56048	0.45935	0.56048	0.54194	0.56048
0.27613	0.56173	0.45161	0.56173	0.56	0.56173
0.28903	0.56298	0.42581	0.56298	0.55742	0.56298
0.28645	0.56423	0.42581	0.56423	0.58064	0.56423
0.29677	0.56548	0.40774	0.56548	0.57032	0.56548
0.3071	0.56673	0.4	0.56673	0.57548	0.56673
0.30968	0.56798	0.40258	0.56798	0.56	0.56798
0.31226	0.56923	0.39226	0.56923	0.56516	0.56923
0.32	0.57048	0.38452	0.57048	0.56516	0.57048
0.32516	0.57173	0.37677	0.57173	0.57032	0.57173
0.32516	0.57298	0.37161	0.57298	0.57548	0.57298
0.32258	0.57423	0.36387	0.57423	0.58323	0.57423
0.32258	0.57548	0.35871	0.57548	0.58839	0.57548
0.33548	0.57673	0.36645	0.57673	0.5729	0.57673
0.33806	0.57798	0.35871	0.57798	0.58064	0.57798
0.34323	0.57923	0.35613	0.57923	0.58064	0.57923
0.35355	0.58048	0.35871	0.58048	0.57806	0.58048
0.34839	0.58173	0.34581	0.58173	0.56258	0.58173
0.35097	0.58298	0.35097	0.58298	0.56774	0.58298
0.35097	0.58423	0.33548	0.58423	0.58064	0.58423
0.34839	0.58548	0.3329	0.58548	0.58064	0.58548
0.35097	0.58673	0.32258	0.58673	0.56774	0.58673
0.35871	0.58798	0.32774	0.58798	0.57032	0.58798
0.34839	0.58923	0.32	0.58923	0.55742	0.58923
0.35871	0.59048	0.32	0.59048	0.53935	0.59048
0.35355	0.59173	0.33548	0.59173	0.54452	0.59173
0.34581	0.59298	0.34323	0.59298	0.53935	0.59298
0.3329	0.59423	0.36129	0.59423	0.51871	0.59423
0.3329	0.59548	0.36645	0.59548	0.52387	0.59548
0.33032	0.59673	0.36387	0.59673	0.51871	0.59673
0.33548	0.59798	0.33032	0.59798	0.51613	0.59798
0.34323	0.59923	0.32258	0.59923	0.51613	0.59923
0.34839	0.60048	0.33032	0.60048	0.50839	0.60048
0.34323	0.60173	0.33548	0.60173	0.51613	0.60173
0.35097	0.60298	0.3329	0.60298	0.50581	0.60298
0.35097	0.60423	0.34064	0.60423	0.50064	0.60423
0.35355	0.60548	0.35355	0.60548	0.48516	0.60548
0.35871	0.60673	0.36129	0.60673	0.49548	0.60673
0.36387	0.60798	0.36387	0.60798	0.49032	0.60798
0.35355	0.60923	0.37161	0.60923	0.48	0.60923
0.34581	0.61048	0.37161	0.61048	0.47226	0.61048
0.34581	0.61173	0.38194	0.61173	0.45936	0.61173
0.34064	0.61298	0.38452	0.61298	0.45936	0.61298
0.34581	0.61423	0.4	0.61423	0.45419	0.61423
0.33806	0.61548	0.39484	0.61548	0.46194	0.61548
0.33548	0.61673	0.38968	0.61673	0.44903	0.61673
0.33548	0.61798	0.3871	0.61798	0.43871	0.61798
0.33032	0.61923	0.37935	0.61923	0.45677	0.61923
0.33548	0.62048	0.38194	0.62048	0.45936	0.62048
0.32	0.62173	0.37419	0.62173	0.4671	0.62173
0.32	0.62298	0.37419	0.62298	0.44903	0.62298
0.32258	0.62423	0.37419	0.62423	0.43871	0.62423
0.3329	0.62548	0.38194	0.62548	0.44903	0.62548
0.33032	0.62673	0.3871	0.62673	0.45161	0.62673
0.33806	0.62798	0.3871	0.62798	0.45677	0.62798
0.32258	0.62923	0.39484	0.62923	0.45677	0.62923
0.32	0.63048	0.3871	0.63048	0.45419	0.63048
0.31742	0.63173	0.37935	0.63173	0.45419	0.63173
0.32516	0.63298	0.37161	0.63298	0.45161	0.63298
0.33032	0.63423	0.36387	0.63423	0.45677	0.63423
0.33032	0.63548	0.35871	0.63548	0.45419	0.63548
0.34064	0.63673	0.36387	0.63673	0.45161	0.63673
0.33548	0.63798	0.36129	0.63798	0.45677	0.63798
0.32774	0.63923	0.35871	0.63923	0.45161	0.63923
0.32774	0.64048	0.36387	0.64048	0.44387	0.64048
0.32774	0.64173	0.35871	0.64173	0.43355	0.64173
0.32516	0.64298	0.36387	0.64298	0.44903	0.64298
0.31742	0.64423	0.35613	0.64423	0.44903	0.64423
0.32258	0.64548	0.34064	0.64548	0.47484	0.64548
0.31742	0.64673	0.33806	0.64673	0.47742	0.64673
0.32258	0.64798	0.32774	0.64798	0.47742	0.64798
0.33806	0.64923	0.3329	0.64923	0.48774	0.64923
0.33548	0.65048	0.31742	0.65048	0.49806	0.65048
0.33806	0.65173	0.33032	0.65173	0.48774	0.65173
0.33548	0.65298	0.32516	0.65298	0.48	0.65298
0.34839	0.65423	0.31742	0.65423	0.47226	0.65423
0.35097	0.65548	0.32258	0.65548	0.47742	0.65548
0.34581	0.65673	0.32516	0.65673	0.50581	0.65673
0.34581	0.65798	0.32516	0.65798	0.48258	0.65798
0.33548	0.65923	0.32774	0.65923	0.4929	0.65923
0.33548	0.66048	0.32774	0.66048	0.48258	0.66048
0.32774	0.66173	0.3329	0.66173	0.48258	0.66173
0.33548	0.66298	0.3329	0.66298	0.48	0.66298
0.31742	0.66423	0.32258	0.66423	0.46452	0.66423
0.31226	0.66548	0.31226	0.66548	0.45419	0.66548
0.31226	0.66673	0.31226	0.66673	0.45935	0.66673
0.31742	0.66798	0.30194	0.66798	0.45677	0.66798
0.32516	0.66923	0.29677	0.66923	0.46452	0.66923
0.32774	0.67048	0.30194	0.67048	0.46452	0.67048
0.32	0.67173	0.28129	0.67173	0.46968	0.67173
0.32258	0.67298	0.29677	0.67298	0.46968	0.67298
0.32	0.67423	0.29936	0.67423	0.48	0.67423
0.31226	0.67548	0.29677	0.67548	0.48	0.67548
0.30968	0.67673	0.29677	0.67673	0.47742	0.67673
0.30194	0.67798	0.29419	0.67798	0.48	0.67798
0.29936	0.67923	0.29161	0.67923	0.48774	0.67923
0.30194	0.68048	0.29936	0.68048	0.48774	0.68048
0.31226	0.68173	0.29677	0.68173	0.47742	0.68173
0.30968	0.68298	0.29161	0.68298	0.47742	0.68298
0.30452	0.68423	0.30194	0.68423	0.44645	0.68423
0.30968	0.68548	0.3071	0.68548	0.45161	0.68548
0.3071	0.68673	0.31226	0.68673	0.44129	0.68673
0.29677	0.68798	0.30968	0.68798	0.42839	0.68798
0.29419	0.68923	0.31742	0.68923	0.42064	0.68923
0.29419	0.69048	0.3071	0.69048	0.42581	0.69048
0.29161	0.69173	0.30452	0.69173	0.42581	0.69173
0.27613	0.69298	0.32	0.69298	0.42839	0.69298
0.28129	0.69423	0.33032	0.69423	0.42581	0.69423
0.29161	0.69548	0.32774	0.69548	0.40516	0.69548
0.29677	0.69673	0.3329	0.69673	0.4129	0.69673
0.3071	0.69798	0.34064	0.69798	0.40774	0.69798
0.30452	0.69923	0.34064	0.69923	0.40258	0.69923
0.30968	0.70048	0.34581	0.70048	0.40258	0.70048
0.29936	0.70173	0.34323	0.70173	0.4129	0.70173
0.31226	0.70298	0.35613	0.70298	0.41548	0.70298
0.3071	0.70423	0.36129	0.70423	0.41548	0.70423
0.30194	0.70548	0.36387	0.70548	0.41032	0.70548
0.29936	0.70673	0.37161	0.70673	0.4129	0.70673
0.29161	0.70798	0.36387	0.70798	0.40516	0.70798
0.28645	0.70923	0.35613	0.70923	0.4129	0.70923
0.28387	0.71048	0.36903	0.71048	0.41806	0.71048
0.29419	0.71173	0.35355	0.71173	0.40516	0.71173
0.29161	0.71298	0.35355	0.71298	0.40516	0.71298
0.28903	0.71423	0.35355	0.71423	0.4	0.71423
0.29161	0.71548	0.36387	0.71548	0.40258	0.71548
0.29677	0.71673	0.36645	0.71673	0.39484	0.71673
0.28903	0.71798	0.35613	0.71798	0.40258	0.71798
0.26839	0.71923	0.34323	0.71923	0.40516	0.71923
0.2529	0.72048	0.33032	0.72048	0.4	0.72048
0.25806	0.72173	0.33032	0.72173	0.39484	0.72173
0.25548	0.72298	0.33032	0.72298	0.40516	0.72298
0.25032	0.72423	0.32516	0.72423	0.39484	0.72423
0.24258	0.72548	0.3329	0.72548	0.40516	0.72548
0.23742	0.72673	0.32516	0.72673	0.41548	0.72673
0.23484	0.72798	0.33806	0.72798	0.42839	0.72798
0.23484	0.72923	0.33548	0.72923	0.42064	0.72923
0.2271	0.73048	0.3329	0.73048	0.43355	0.73048
0.2271	0.73173	0.32	0.73173	0.43355	0.73173
0.21936	0.73298	0.31226	0.73298	0.44129	0.73298
0.20645	0.73423	0.3071	0.73423	0.43355	0.73423
0.19871	0.73548	0.30452	0.73548	0.42064	0.73548
0.19613	0.73673	0.30194	0.73673	0.42064	0.73673
0.20129	0.73798	0.29936	0.73798	0.42064	0.73798
0.19097	0.73923	0.29161	0.73923	0.41548	0.73923
0.19613	0.74048	0.29161	0.74048	0.40516	0.74048
0.19355	0.74173	0.28645	0.74173	0.40516	0.74173
0.20129	0.74298	0.27355	0.74298	0.40516	0.74298
0.20387	0.74423	0.27097	0.74423	0.40516	0.74423
0.21161	0.74548	0.27355	0.74548	0.4	0.74548
0.21677	0.74673	0.27613	0.74673	0.4	0.74673
0.21936	0.74798	0.28645	0.74798	0.3871	0.74798
0.21936	0.74923	0.27871	0.74923	0.37677	0.74923
0.20129	0.75048	0.28129	0.75048	0.3871	0.75048
0.20903	0.75173	0.28645	0.75173	0.38968	0.75173
0.20903	0.75298	0.29419	0.75298	0.39484	0.75298
0.21677	0.75423	0.28645	0.75423	0.39742	0.75423
0.2271	0.75548	0.27355	0.75548	0.40516	0.75548
0.23484	0.75673	0.28129	0.75673	0.4	0.75673
0.24	0.75798	0.28903	0.75798	0.4	0.75798
0.24774	0.75923	0.29419	0.75923	0.40774	0.75923
0.2529	0.76048	0.29161	0.76048	0.41548	0.76048
0.2529	0.76173	0.27613	0.76173	0.40516	0.76173
0.26323	0.76298	0.27355	0.76298	0.41032	0.76298
0.27355	0.76423	0.26581	0.76423	0.40516	0.76423
0.27097	0.76548	0.27355	0.76548	0.4	0.76548
0.27613	0.76673	0.26839	0.76673	0.37936	0.76673
0.28129	0.76798	0.27613	0.76798	0.38194	0.76798
0.29161	0.76923	0.27097	0.76923	0.38194	0.76923
0.28645	0.77048	0.27355	0.77048	0.37936	0.77048
0.28645	0.77173	0.26839	0.77173	0.37419	0.77173
0.28903	0.77298	0.27097	0.77298	0.37677	0.77298
0.29161	0.77423	0.26323	0.77423	0.39226	0.77423
0.28129	0.77548	0.26064	0.77548	0.39742	0.77548
0.28387	0.77673	0.25806	0.77673	0.4129	0.77673
0.29677	0.77798	0.2529	0.77798	0.41032	0.77798
0.29419	0.77923	0.25548	0.77923	0.40774	0.77923
0.29419	0.78048	0.25806	0.78048	0.40516	0.78048
0.28645	0.78173	0.27613	0.78173	0.40516	0.78173
0.28903	0.78298	0.27097	0.78298	0.39742	0.78298
0.28129	0.78423	0.25806	0.78423	0.38968	0.78423
0.28129	0.78548	0.25806	0.78548	0.39226	0.78548
0.28387	0.78673	0.25032	0.78673	0.39226	0.78673
0.28903	0.78798	0.25806	0.78798	0.39226	0.78798
0.28903	0.78923	0.25806	0.78923	0.39226	0.78923
0.28645	0.79048	0.26064	0.79048	0.38452	0.79048
0.29677	0.79173	0.2529	0.79173	0.38194	0.79173
0.29419	0.79298	0.24516	0.79298	0.37161	0.79298
0.28129	0.79423	0.2529	0.79423	0.36129	0.79423
0.28129	0.79548	0.25032	0.79548	0.35613	0.79548
0.28129	0.79673	0.25032	0.79673	0.34839	0.79673
0.27355	0.79798	0.24774	0.79798	0.34064	0.79798
0.26839	0.79923	0.2529	0.79923	0.33548	0.79923
0.26323	0.80048	0.25806	0.80048	0.32774	0.80048
0.2529	0.80173	0.26581	0.80173	0.31484	0.80173
0.2529	0.80298	0.26323	0.80298	0.30968	0.80298
0.24774	0.80423	0.26064	0.80423	0.30452	0.80423
0.24258	0.80548	0.2529	0.80548	0.3071	0.80548
0.23484	0.80673	0.2529	0.80673	0.32	0.80673
0.22968	0.80798	0.2529	0.80798	0.32	0.80798
0.23742	0.80923	0.24774	0.80923	0.30968	0.80923
0.22968	0.81048	0.2529	0.81048	0.30452	0.81048
0.23742	0.81173	0.25548	0.81173	0.31742	0.81173
0.23226	0.81298	0.26839	0.81298	0.31484	0.81298
0.23226	0.81423	0.26581	0.81423	0.30194	0.81423
0.24	0.81548	0.27355	0.81548	0.29419	0.81548
0.22452	0.81673	0.28129	0.81673	0.3071	0.81673
0.21677	0.81798	0.28129	0.81798	0.31226	0.81798
0.21161	0.81923	0.27613	0.81923	0.32258	0.81923
0.21419	0.82048	0.26323	0.82048	0.32516	0.82048
0.20645	0.82173	0.25548	0.82173	0.3329	0.82173
0.21419	0.82298	0.25548	0.82298	0.34323	0.82298
0.20903	0.82423	0.25548	0.82423	0.34323	0.82423
0.21161	0.82548	0.26064	0.82548	0.33032	0.82548
0.20903	0.82673	0.2529	0.82673	0.33806	0.82673
0.21161	0.82798	0.24516	0.82798	0.32258	0.82798
0.20903	0.82923	0.23226	0.82923	0.31742	0.82923
0.19355	0.83048	0.23742	0.83048	0.31484	0.83048
0.18581	0.83173	0.24	0.83173	0.31742	0.83173
0.18839	0.83298	0.24	0.83298	0.3329	0.83298
0.18064	0.83422	0.24516	0.83422	0.3329	0.83422
0.18064	0.83547	0.23742	0.83547	0.34064	0.83547
0.19097	0.83673	0.24258	0.83673	0.34064	0.83673
0.18839	0.83797	0.2529	0.83797	0.3329	0.83797
0.18839	0.83922	0.26839	0.83922	0.33806	0.83922
0.19097	0.84047	0.25806	0.84047	0.34323	0.84047
0.18581	0.84172	0.25548	0.84172	0.34323	0.84172
0.18581	0.84297	0.24774	0.84297	0.35097	0.84297
0.18581	0.84422	0.24258	0.84422	0.34839	0.84422
0.18839	0.84547	0.24258	0.84547	0.34064	0.84547
0.19613	0.84672	0.24258	0.84672	0.33032	0.84672
0.18581	0.84797	0.24516	0.84797	0.34064	0.84797
0.19355	0.84922	0.24258	0.84922	0.34839	0.84922
0.18839	0.85047	0.24	0.85047	0.34064	0.85047
0.19097	0.85172	0.23742	0.85172	0.33548	0.85172
0.19613	0.85297	0.24	0.85297	0.33806	0.85297
0.19613	0.85422	0.22968	0.85422	0.3329	0.85422
0.20645	0.85547	0.22194	0.85547	0.32516	0.85547
0.21161	0.85672	0.21677	0.85672	0.32258	0.85672
0.21419	0.85797	0.21936	0.85797	0.32	0.85797
0.20645	0.85922	0.21677	0.85922	0.32516	0.85922
0.21677	0.86047	0.22968	0.86047	0.32516	0.86047
0.20903	0.86172	0.22968	0.86172	0.32258	0.86172
0.20903	0.86297	0.24	0.86297	0.31484	0.86297
0.21161	0.86422	0.23484	0.86422	0.33032	0.86422
0.20645	0.86547	0.23484	0.86547	0.32	0.86547
0.20129	0.86672	0.24516	0.86672	0.32774	0.86672
0.19871	0.86797	0.24774	0.86797	0.32774	0.86797
0.20645	0.86922	0.2529	0.86922	0.33548	0.86922
0.20903	0.87047	0.2529	0.87047	0.33032	0.87047
0.21419	0.87172	0.2529	0.87172	0.32258	0.87172
0.22194	0.87297	0.25032	0.87297	0.31484	0.87297
0.21936	0.87422	0.25548	0.87422	0.30968	0.87422
0.21161	0.87547	0.25548	0.87547	0.31484	0.87547
0.21161	0.87672	0.24774	0.87672	0.32258	0.87672
0.21419	0.87797	0.23484	0.87797	0.32258	0.87797
0.21936	0.87922	0.23742	0.87922	0.32	0.87922
0.21936	0.88047	0.24	0.88047	0.33032	0.88047
0.21936	0.88172	0.24258	0.88172	0.32774	0.88172
0.20903	0.88297	0.2529	0.88297	0.3329	0.88297
0.20645	0.88422	0.24774	0.88422	0.32516	0.88422
0.20387	0.88547	0.2529	0.88547	0.31742	0.88547
0.20903	0.88672	0.25806	0.88672	0.31742	0.88672
0.21161	0.88797	0.25548	0.88797	0.31484	0.88797
0.20903	0.88922	0.2529	0.88922	0.30968	0.88922
0.20645	0.89047	0.25548	0.89047	0.30968	0.89047
0.20645	0.89172	0.25548	0.89172	0.30452	0.89172
0.20129	0.89297	0.26839	0.89297	0.29936	0.89297
0.19097	0.89422	0.26839	0.89422	0.30968	0.89422
0.18839	0.89547	0.26323	0.89547	0.3071	0.89547
0.19097	0.89672	0.25806	0.89672	0.30968	0.89672
0.19613	0.89797	0.25806	0.89797	0.29419	0.89797
0.18581	0.89922	0.25032	0.89922	0.29419	0.89922
0.18839	0.90047	0.25032	0.90047	0.28903	0.90047
0.19097	0.90172	0.24774	0.90172	0.28387	0.90172
0.18064	0.90297	0.24516	0.90297	0.27355	0.90297
0.18839	0.90422	0.24774	0.90422	0.27871	0.90422
0.19097	0.90547	0.24774	0.90547	0.27097	0.90547
0.19355	0.90672	0.24258	0.90672	0.27097	0.90672
0.18323	0.90797	0.2271	0.90797	0.26323	0.90797
0.17548	0.90922	0.22452	0.90922	0.26064	0.90922
0.17032	0.91047	0.22452	0.91047	0.25548	0.91047
0.16	0.91172	0.22194	0.91172	0.25548	0.91172
0.16	0.91297	0.21936	0.91297	0.2529	0.91297
0.16	0.91422	0.21936	0.91422	0.24774	0.91422
0.15484	0.91547	0.21677	0.91547	0.24774	0.91547
0.15484	0.91672	0.21161	0.91672	0.24774	0.91672
0.14452	0.91797	0.21677	0.91797	0.2529	0.91797
0.14452	0.91922	0.21677	0.91922	0.25032	0.91922
0.14452	0.92047	0.21936	0.92047	0.2529	0.92047
0.15226	0.92172	0.21161	0.92172	0.2529	0.92172
0.15484	0.92297	0.21161	0.92297	0.25548	0.92297
0.15742	0.92422	0.20903	0.92422	0.25806	0.92422
0.15226	0.92547	0.20387	0.92547	0.2529	0.92547
0.1471	0.92672	0.19871	0.92672	0.24774	0.92672
0.14968	0.92797	0.20129	0.92797	0.24258	0.92797
0.14968	0.92922	0.19613	0.92922	0.24	0.92922
0.14194	0.93047	0.19097	0.93047	0.24258	0.93047
0.13677	0.93172	0.18323	0.93172	0.23484	0.93172
0.14194	0.93297	0.19355	0.93297	0.22968	0.93297
0.14452	0.93422	0.19613	0.93422	0.2271	0.93422
0.13419	0.93547	0.19613	0.93547	0.21936	0.93547
0.13677	0.93672	0.19613	0.93672	0.23484	0.93672
0.14452	0.93797	0.19355	0.93797	0.22968	0.93797
0.13936	0.93922	0.19097	0.93922	0.23484	0.93922
0.13677	0.94047	0.18839	0.94047	0.24774	0.94047
0.14194	0.94172	0.19097	0.94172	0.25032	0.94172
0.13936	0.94297	0.19097	0.94297	0.25806	0.94297
0.13936	0.94422	0.18839	0.94422	0.26839	0.94422
0.13677	0.94547	0.19871	0.94547	0.27097	0.94547
0.1471	0.94672	0.19871	0.94672	0.27355	0.94672
0.15484	0.94797	0.20129	0.94797	0.28645	0.94797
0.15484	0.94922	0.20387	0.94922	0.28129	0.94922
0.16516	0.95047	0.21161	0.95047	0.27613	0.95047
0.17548	0.95172	0.21161	0.95172	0.28387	0.95172
0.1729	0.95297	0.21677	0.95297	0.28903	0.95297
0.1729	0.95422	0.21677	0.95422	0.28645	0.95422
0.17548	0.95547	0.21677	0.95547	0.29161	0.95547
0.18064	0.95672	0.22194	0.95672	0.29161	0.95672
0.18581	0.95797	0.22968	0.95797	0.28645	0.95797
0.18323	0.95922	0.2271	0.95922	0.29936	0.95922
0.18064	0.96047	0.23484	0.96047	0.30194	0.96047
0.17548	0.96172	0.23484	0.96172	0.29419	0.96172
0.16774	0.96297	0.23226	0.96297	0.30194	0.96297
0.17032	0.96422	0.22968	0.96422	0.29677	0.96422
0.17032	0.96547	0.24258	0.96547	0.29936	0.96547
0.17032	0.96672	0.24258	0.96672	0.3071	0.96672
0.16774	0.96797	0.24516	0.96797	0.31226	0.96797
0.17032	0.96922	0.25032	0.96922	0.30968	0.96922
0.17032	0.97047	0.24774	0.97047	0.31484	0.97047
0.16774	0.97172	0.23742	0.97172	0.32258	0.97172
0.16258	0.97297	0.23742	0.97297	0.32258	0.97297
0.1729	0.97422	0.23742	0.97422	0.32	0.97422
0.16774	0.97547	0.23484	0.97547	0.30452	0.97547
0.16774	0.97672	0.24	0.97672	0.30452	0.97672
0.17548	0.97797	0.24	0.97797	0.30968	0.97797
0.1729	0.97922	0.23742	0.97922	0.30194	0.97922
0.17032	0.98047	0.23484	0.98047	0.29936	0.98047
0.17032	0.98172	0.23226	0.98172	0.29161	0.98172
0.18323	0.98297	0.2271	0.98297	0.28387	0.98297
0.18839	0.98422	0.22452	0.98422	0.28129	0.98422
0.18581	0.98547	0.23484	0.98547	0.27097	0.98547
0.19355	0.98672	0.23226	0.98672	0.26064	0.98672
0.18839	0.98797	0.22968	0.98797	0.27097	0.98797
0.18064	0.98922	0.21677	0.98922	0.27871	0.98922
0.18064	0.99047	0.21161	0.99047	0.27613	0.99047
0.17806	0.99172	0.20387	0.99172	0.27355	0.99172
0.18581	0.99297	0.21419	0.99297	0.26839	0.99297
0.18064	0.99422	0.21936	0.99422	0.26323	0.99422
0.18064	0.99547	0.20645	0.99547	0.26323	0.99547
0.1729	0.99672	0.20129	0.99672	0.26839	0.99672
0.17806	0.99797	0.19613	0.99797	0.24774	0.99797
0.18064	0.99922	0.18839	0.99922	0.24258	0.99922
0.19097	1.00047	0.18839	1.00047	0.25548	1.00047
0.19613	1.00172	0.18323	1.00172	0.25032	1.00172
0.19871	1.00297	0.18581	1.00297	0.25806	1.00297
0.19613	1.00422	0.17548	1.00422	0.2529	1.00422
0.19613	1.00547	0.17548	1.00547	0.26064	1.00547
0.20129	1.00672	0.17806	1.00672	0.25548	1.00672
0.21161	1.00797	0.1729	1.00797	0.26064	1.00797
0.21161	1.00922	0.17032	1.00922	0.26323	1.00922
0.21161	1.01047	0.16774	1.01047	0.2529	1.01047
0.21936	1.01172	0.17806	1.01172	0.26839	1.01172
0.21419	1.01297	0.18323	1.01297	0.26839	1.01297
0.21161	1.01422	0.18323	1.01422	0.28387	1.01422
0.21677	1.01547	0.18323	1.01547	0.28645	1.01547
0.20903	1.01672	0.18064	1.01672	0.27871	1.01672
0.21419	1.01797	0.18064	1.01797	0.28387	1.01797
0.21677	1.01922	0.18064	1.01922	0.29161	1.01922
0.21677	1.02047	0.17548	1.02047	0.29161	1.02047
0.20129	1.02172	0.1729	1.02172	0.29677	1.02172
0.19871	1.02297	0.17548	1.02297	0.29936	1.02297
0.19613	1.02422	0.17032	1.02422	0.30194	1.02422
0.18323	1.02547	0.16516	1.02547	0.29936	1.02547
0.18839	1.02672	0.16258	1.02672	0.29936	1.02672
0.19355	1.02797	0.17032	1.02797	0.29936	1.02797
0.19097	1.02922	0.17548	1.02922	0.29161	1.02922
0.20129	1.03047	0.17806	1.03047	0.29677	1.03047
0.20645	1.03172	0.17032	1.03172	0.30194	1.03172
0.21161	1.03297	0.17032	1.03297	0.29677	1.03297
0.20903	1.03422	0.17032	1.03422	0.30194	1.03422
0.21161	1.03547	0.16774	1.03547	0.29161	1.03547
0.21161	1.03672	0.17548	1.03672	0.29161	1.03672
0.21161	1.03797	0.17548	1.03797	0.29419	1.03797
0.20387	1.03922	0.1729	1.03922	0.29419	1.03922
0.19613	1.04047	0.18323	1.04047	0.29161	1.04047
0.19871	1.04172	0.17548	1.04172	0.28645	1.04172
0.20387	1.04297	0.1729	1.04297	0.28903	1.04297
0.20129	1.04422	0.16516	1.04422	0.27871	1.04422
0.20129	1.04547	0.15484	1.04547	0.27871	1.04547
0.19097	1.04672	0.15484	1.04672	0.27613	1.04672
0.18581	1.04797	0.16258	1.04797	0.27355	1.04797
0.18323	1.04922	0.16774	1.04922	0.27613	1.04922
0.17806	1.05047	0.15742	1.05047	0.26323	1.05047
0.17806	1.05172	0.16516	1.05172	0.26323	1.05172
0.18064	1.05297	0.17032	1.05297	0.25032	1.05297
0.16774	1.05422	0.16774	1.05422	0.24516	1.05422
0.17548	1.05547	0.1729	1.05547	0.25032	1.05547
0.1729	1.05672	0.17032	1.05672	0.24258	1.05672
0.16774	1.05797	0.17032	1.05797	0.24	1.05797
0.16516	1.05922	0.17548	1.05922	0.23484	1.05922
0.17032	1.06047	0.17548	1.06047	0.22452	1.06047
0.17032	1.06172	0.1729	1.06172	0.22194	1.06172
0.16774	1.06297	0.17032	1.06297	0.2271	1.06297
0.17032	1.06422	0.1729	1.06422	0.2271	1.06422
0.17032	1.06547	0.17806	1.06547	0.21936	1.06547
0.16516	1.06672	0.17548	1.06672	0.22968	1.06672
0.16258	1.06797	0.17806	1.06797	0.23226	1.06797
0.15484	1.06922	0.17032	1.06922	0.23226	1.06922
0.1471	1.07047	0.1729	1.07047	0.2271	1.07047
0.14452	1.07172	0.1729	1.07172	0.23484	1.07172
0.13936	1.07297	0.17032	1.07297	0.2271	1.07297
0.13677	1.07422	0.16516	1.07422	0.22968	1.07422
0.13677	1.07547	0.15742	1.07547	0.23226	1.07547
0.13419	1.07672	0.16258	1.07672	0.23484	1.07672
0.14194	1.07797	0.15742	1.07797	0.22968	1.07797
0.14194	1.07922	0.15226	1.07922	0.23226	1.07922
0.13936	1.08047	0.16258	1.08047	0.23484	1.08047
0.13419	1.08172	0.17032	1.08172	0.22968	1.08172
0.13677	1.08297	0.1729	1.08297	0.2271	1.08297
0.13677	1.08422	0.1729	1.08422	0.22452	1.08422
0.13936	1.08547	0.16774	1.08547	0.22194	1.08547
0.14194	1.08672	0.15742	1.08672	0.22194	1.08672
0.1471	1.08797	0.15484	1.08797	0.22194	1.08797
0.14968	1.08922	0.15226	1.08922	0.22194	1.08922
0.1471	1.09047	0.13677	1.09047	0.22194	1.09047
0.1471	1.09172	0.13936	1.09172	0.22452	1.09172
0.1471	1.09297	0.14194	1.09297	0.22452	1.09297
0.14194	1.09422	0.1471	1.09422	0.21419	1.09422
0.14194	1.09547	0.1471	1.09547	0.21936	1.09547
0.14452	1.09672	0.13936	1.09672	0.22194	1.09672
0.1471	1.09797	0.13936	1.09797	0.21936	1.09797
0.14452	1.09922	0.14194	1.09922	0.22194	1.09922
0.14452	1.10047	0.13936	1.10047	0.2271	1.10047
0.14194	1.10172	0.13936	1.10172	0.22968	1.10172
0.14452	1.10297	0.14452	1.10297	0.22968	1.10297
0.13936	1.10422	0.13936	1.10422	0.2271	1.10422
0.1471	1.10547	0.14194	1.10547	0.20903	1.10547
0.14968	1.10672	0.13936	1.10672	0.20903	1.10672
0.15742	1.10797	0.13936	1.10797	0.19871	1.10797
0.15742	1.10922	0.13161	1.10922	0.20387	1.10922
0.15484	1.11047	0.12903	1.11047	0.19871	1.11047
0.15226	1.11172	0.13677	1.11172	0.19871	1.11172
0.15226	1.11297	0.13936	1.11297	0.20129	1.11297
0.15226	1.11422	0.14194	1.11422	0.20645	1.11422
0.15742	1.11547	0.13677	1.11547	0.19871	1.11547
0.15226	1.11672	0.14194	1.11672	0.20129	1.11672
0.15742	1.11797	0.14194	1.11797	0.20129	1.11797
0.15226	1.11922	0.14194	1.11922	0.20387	1.11922
0.14968	1.12047	0.14194	1.12047	0.20387	1.12047
0.15226	1.12172	0.1471	1.12172	0.20387	1.12172
0.14968	1.12297	0.15226	1.12297	0.20645	1.12297
0.15226	1.12422	0.16	1.12422	0.21161	1.12422
0.15226	1.12547	0.16258	1.12547	0.21161	1.12547
0.15484	1.12672	0.16258	1.12672	0.20903	1.12672
0.15226	1.12797	0.16516	1.12797	0.20387	1.12797
0.14968	1.12922	0.16774	1.12922	0.20387	1.12922
0.14968	1.13047	0.17032	1.13047	0.20129	1.13047
0.15484	1.13172	0.1729	1.13172	0.20129	1.13172
0.15484	1.13297	0.16516	1.13297	0.20387	1.13297
0.15226	1.13422	0.16774	1.13422	0.20129	1.13422
0.14968	1.13547	0.17032	1.13547	0.19097	1.13547
0.14452	1.13672	0.1729	1.13672	0.19871	1.13672
0.14452	1.13797	0.17032	1.13797	0.20387	1.13797
0.14194	1.13922	0.1729	1.13922	0.19871	1.13922
0.14194	1.14047	0.17548	1.14047	0.20129	1.14047
0.13677	1.14172	0.17548	1.14172	0.20903	1.14172
0.13936	1.14297	0.17548	1.14297	0.21161	1.14297
0.13677	1.14422	0.1729	1.14422	0.21419	1.14422
0.13161	1.14547	0.1729	1.14547	0.21677	1.14547
0.12387	1.14672	0.18064	1.14672	0.21677	1.14672
0.12387	1.14797	0.18064	1.14797	0.22194	1.14797
0.11871	1.14922	0.18064	1.14922	0.22194	1.14922
0.12129	1.15047	0.17548	1.15047	0.2271	1.15047
0.12387	1.15172	0.17548	1.15172	0.22194	1.15172
0.12129	1.15297	0.17806	1.15297	0.21419	1.15297
0.11871	1.15422	0.18064	1.15422	0.22452	1.15422
0.11871	1.15547	0.18323	1.15547	0.22194	1.15547
0.11613	1.15672	0.18064	1.15672	0.21936	1.15672
0.11613	1.15797	0.18323	1.15797	0.2271	1.15797
0.11871	1.15922	0.17806	1.15922	0.22968	1.15922
0.11097	1.16047	0.1729	1.16047	0.2271	1.16047
0.11613	1.16172	0.16774	1.16172	0.22452	1.16172
0.11613	1.16297	0.16774	1.16297	0.21936	1.16297
0.12129	1.16422	0.1729	1.16422	0.22194	1.16422
0.11355	1.16547	0.17032	1.16547	0.21677	1.16547
0.11613	1.16672	0.17548	1.16672	0.22452	1.16672
0.12129	1.16797	0.17806	1.16797	0.21677	1.16797
0.12387	1.16921	0.16774	1.16921	0.21936	1.16921
0.11871	1.17047	0.15742	1.17047	0.2271	1.17047
0.11355	1.17171	0.16	1.17171	0.23742	1.17171
0.11613	1.17296	0.15484	1.17296	0.23484	1.17296
0.11871	1.17421	0.16258	1.17421	0.24	1.17421
0.12645	1.17546	0.16	1.17546	0.24516	1.17546
0.13419	1.17671	0.16258	1.17671	0.24	1.17671
0.13419	1.17796	0.15484	1.17796	0.24258	1.17796
0.13419	1.17921	0.15484	1.17921	0.23484	1.17921
0.13419	1.18046	0.15484	1.18046	0.2271	1.18046
0.13936	1.18171	0.15742	1.18171	0.22968	1.18171
0.13936	1.18296	0.16258	1.18296	0.23484	1.18296
0.14194	1.18421	0.16	1.18421	0.22968	1.18421
0.13936	1.18546	0.15226	1.18546	0.23484	1.18546
0.13936	1.18671	0.15226	1.18671	0.2271	1.18671
0.1471	1.18796	0.14968	1.18796	0.2271	1.18796
0.14968	1.18921	0.1471	1.18921	0.21936	1.18921
0.14194	1.19046	0.14968	1.19046	0.2271	1.19046
0.14452	1.19171	0.1471	1.19171	0.22968	1.19171
0.14452	1.19296	0.14968	1.19296	0.22452	1.19296
0.14194	1.19421	0.14452	1.19421	0.22194	1.19421
0.13936	1.19546	0.14452	1.19546	0.22194	1.19546
0.14452	1.19671	0.13419	1.19671	0.21161	1.19671
0.1471	1.19796	0.13419	1.19796	0.21161	1.19796
0.14968	1.19921	0.13677	1.19921	0.21161	1.19921
0.14194	1.20046	0.13936	1.20046	0.20645	1.20046
0.13677	1.20171	0.13936	1.20171	0.20645	1.20171
0.13161	1.20296	0.13419	1.20296	0.20903	1.20296
0.13419	1.20421	0.13161	1.20421	0.21936	1.20421
0.12645	1.20546	0.13419	1.20546	0.21936	1.20546
0.12387	1.20671	0.12903	1.20671	0.22452	1.20671
0.12129	1.20796	0.12903	1.20796	0.22452	1.20796
0.12903	1.20921	0.13677	1.20921	0.22452	1.20921
0.13677	1.21046	0.13677	1.21046	0.21419	1.21046
0.13677	1.21171	0.13936	1.21171	0.21677	1.21171
0.13419	1.21296	0.13677	1.21296	0.20903	1.21296
0.12903	1.21421	0.13677	1.21421	0.19871	1.21421
0.11613	1.21546	0.13419	1.21546	0.19613	1.21546
0.11871	1.21671	0.13677	1.21671	0.19871	1.21671
0.12387	1.21796	0.13936	1.21796	0.19355	1.21796
0.12129	1.21921	0.13161	1.21921	0.18839	1.21921
0.11871	1.22046	0.12903	1.22046	0.18581	1.22046
0.11613	1.22171	0.12645	1.22171	0.18581	1.22171
0.11355	1.22296	0.12387	1.22296	0.18323	1.22296
0.11613	1.22421	0.12903	1.22421	0.17806	1.22421
0.11613	1.22546	0.12645	1.22546	0.18323	1.22546
0.11097	1.22671	0.12903	1.22671	0.18323	1.22671
0.10839	1.22796	0.13161	1.22796	0.18323	1.22796
0.11097	1.22921	0.12903	1.22921	0.17548	1.22921
0.10839	1.23046	0.13161	1.23046	0.1729	1.23046
0.10323	1.23171	0.12645	1.23171	0.16258	1.23171
0.10839	1.23296	0.12387	1.23296	0.16	1.23296
0.10581	1.23421	0.12387	1.23421	0.15484	1.23421
0.10839	1.23546	0.12129	1.23546	0.15484	1.23546
0.11097	1.23671	0.11871	1.23671	0.15742	1.23671
0.11355	1.23796	0.12129	1.23796	0.16258	1.23796
0.11613	1.23921	0.12129	1.23921	0.18323	1.23921
0.11355	1.24046	0.11613	1.24046	0.18581	1.24046
0.11613	1.24171	0.11613	1.24171	0.18581	1.24171
0.11355	1.24296	0.12129	1.24296	0.17548	1.24296
0.12129	1.24421	0.11097	1.24421	0.17548	1.24421
0.12387	1.24546	0.11355	1.24546	0.17032	1.24546
0.12387	1.24671	0.11871	1.24671	0.16774	1.24671
0.11613	1.24796	0.11871	1.24796	0.15742	1.24796
0.10839	1.24921	0.11871	1.24921	0.16	1.24921
0.11097	1.25046	0.11871	1.25046	0.15742	1.25046
0.11355	1.25171	0.11613	1.25171	0.16258	1.25171
0.11355	1.25296	0.11613	1.25296	0.16258	1.25296
0.11871	1.25421	0.11613	1.25421	0.16774	1.25421
0.11613	1.25546	0.11871	1.25546	0.15742	1.25546
0.11355	1.25671	0.11355	1.25671	0.16258	1.25671
0.11871	1.25796	0.11871	1.25796	0.16516	1.25796
0.11613	1.25921	0.11613	1.25921	0.16774	1.25921
0.11355	1.26046	0.11097	1.26046	0.16258	1.26046
0.11097	1.26171	0.11871	1.26171	0.16258	1.26171
0.12129	1.26296	0.12129	1.26296	0.16774	1.26296
0.12645	1.26421	0.12387	1.26421	0.17032	1.26421
0.12903	1.26546	0.11871	1.26546	0.16774	1.26546
0.13677	1.26671	0.12645	1.26671	0.16774	1.26671
0.13936	1.26796	0.12903	1.26796	0.1729	1.26796
0.13936	1.26921	0.12903	1.26921	0.17032	1.26921
0.13677	1.27046	0.12903	1.27046	0.1729	1.27046
0.13677	1.27171	0.13161	1.27171	0.1729	1.27171
0.13936	1.27296	0.13161	1.27296	0.17806	1.27296
0.13677	1.27421	0.13419	1.27421	0.17806	1.27421
0.13419	1.27546	0.13419	1.27546	0.16774	1.27546
0.13419	1.27671	0.12903	1.27671	0.1729	1.27671
0.13677	1.27796	0.13161	1.27796	0.16	1.27796
0.13936	1.27921	0.12903	1.27921	0.15742	1.27921
0.1471	1.28046	0.12903	1.28046	0.16	1.28046
0.1471	1.28171	0.12645	1.28171	0.16	1.28171
0.1471	1.28296	0.12903	1.28296	0.15226	1.28296
0.14452	1.28421	0.12903	1.28421	0.16	1.28421
0.14194	1.28546	0.12129	1.28546	0.17032	1.28546
0.14194	1.28671	0.11613	1.28671	0.1729	1.28671
0.14452	1.28796	0.11613	1.28796	0.17806	1.28796
0.13936	1.28921	0.11613	1.28921	0.17548	1.28921
0.13677	1.29046	0.11613	1.29046	0.17548	1.29046
0.13677	1.29171	0.11355	1.29171	0.17548	1.29171
0.13419	1.29296	0.11613	1.29296	0.1729	1.29296
0.13419	1.29421	0.11613	1.29421	0.17548	1.29421
0.13936	1.29546	0.12129	1.29546	0.17548	1.29546
0.13677	1.29671	0.11871	1.29671	0.17548	1.29671
0.13419	1.29796	0.11871	1.29796	0.17806	1.29796
0.13677	1.29921	0.11613	1.29921	0.18064	1.29921
0.13677	1.30046	0.10839	1.30046	0.18839	1.30046
0.12387	1.30171	0.11355	1.30171	0.18323	1.30171
0.11871	1.30296	0.11871	1.30296	0.17032	1.30296
0.11355	1.30421	0.12129	1.30421	0.17032	1.30421
0.10581	1.30546	0.11355	1.30546	0.17032	1.30546
0.10064	1.30671	0.10839	1.30671	0.16774	1.30671
0.10581	1.30796	0.10581	1.30796	0.17032	1.30796
0.10839	1.30921	0.10581	1.30921	0.17032	1.30921
0.10323	1.31046	0.10581	1.31046	0.17806	1.31046
0.10839	1.31171	0.10839	1.31171	0.17806	1.31171
0.10581	1.31296	0.10581	1.31296	0.18064	1.31296
0.10323	1.31421	0.10581	1.31421	0.18581	1.31421
0.10064	1.31546	0.10581	1.31546	0.17806	1.31546
0.09806	1.31671	0.10064	1.31671	0.17032	1.31671
0.10064	1.31796	0.10064	1.31796	0.16516	1.31796
0.09032	1.31921	0.10581	1.31921	0.16774	1.31921
0.0929	1.32046	0.10581	1.32046	0.16774	1.32046
0.0929	1.32171	0.10839	1.32171	0.17548	1.32171
0.0929	1.32296	0.10581	1.32296	0.1729	1.32296
0.09806	1.32421	0.11097	1.32421	0.16516	1.32421
0.10581	1.32546	0.11355	1.32546	0.16774	1.32546
0.10581	1.32671	0.10839	1.32671	0.16	1.32671
0.10581	1.32796	0.11355	1.32796	0.16516	1.32796
0.10323	1.32921	0.11355	1.32921	0.16516	1.32921
0.10323	1.33046	0.11355	1.33046	0.16258	1.33046
0.10323	1.33171	0.10839	1.33171	0.16258	1.33171
0.10581	1.33296	0.10323	1.33296	0.16774	1.33296
0.10064	1.33421	0.09806	1.33421	0.17032	1.33421
0.10323	1.33546	0.10064	1.33546	0.17032	1.33546
0.10581	1.33671	0.10581	1.33671	0.16258	1.33671
0.10839	1.33796	0.10839	1.33796	0.16	1.33796
0.11097	1.33921	0.12129	1.33921	0.15226	1.33921
0.11613	1.34046	0.11613	1.34046	0.15484	1.34046
0.11097	1.34171	0.11613	1.34171	0.16774	1.34171
0.11097	1.34296	0.11355	1.34296	0.17032	1.34296
0.10839	1.34421	0.11871	1.34421	0.16774	1.34421
0.10839	1.34546	0.12129	1.34546	0.16774	1.34546
0.10064	1.34671	0.12645	1.34671	0.16774	1.34671
0.10323	1.34796	0.12645	1.34796	0.16774	1.34796
0.10323	1.34921	0.12645	1.34921	0.16258	1.34921
0.09806	1.35046	0.12387	1.35046	0.16258	1.35046
0.09806	1.35171	0.12903	1.35171	0.16516	1.35171
0.10064	1.35296	0.13936	1.35296	0.16516	1.35296
0.09806	1.35421	0.13936	1.35421	0.16774	1.35421
0.09806	1.35546	0.13677	1.35546	0.1729	1.35546
0.0929	1.35671	0.13677	1.35671	0.17806	1.35671
0.09032	1.35796	0.13677	1.35796	0.1729	1.35796
0.09032	1.35921	0.13677	1.35921	0.1729	1.35921
0.08516	1.36046	0.13161	1.36046	0.16516	1.36046
0.08258	1.36171	0.12903	1.36171	0.16258	1.36171
0.08258	1.36296	0.12903	1.36296	0.16516	1.36296
0.07484	1.36421	0.12903	1.36421	0.16258	1.36421
0.07484	1.36546	0.12903	1.36546	0.16774	1.36546
0.07742	1.36671	0.12645	1.36671	0.16516	1.36671
0.08516	1.36796	0.12387	1.36796	0.16774	1.36796
0.0929	1.36921	0.12129	1.36921	0.1729	1.36921
0.09548	1.37046	0.13161	1.37046	0.17032	1.37046
0.09032	1.37171	0.13419	1.37171	0.16774	1.37171
0.09032	1.37296	0.13419	1.37296	0.16516	1.37296
0.09032	1.37421	0.13419	1.37421	0.16258	1.37421
0.09032	1.37546	0.12645	1.37546	0.16516	1.37546
0.08258	1.37671	0.12387	1.37671	0.1729	1.37671
0.07742	1.37796	0.11613	1.37796	0.17548	1.37796
0.07742	1.37921	0.11355	1.37921	0.1729	1.37921
0.07742	1.38046	0.10581	1.38046	0.16258	1.38046
0.07742	1.38171	0.10839	1.38171	0.16	1.38171
0.07742	1.38296	0.10323	1.38296	0.16516	1.38296
0.07742	1.38421	0.10839	1.38421	0.16	1.38421
0.08	1.38546	0.10839	1.38546	0.16258	1.38546
0.08	1.38671	0.11097	1.38671	0.16516	1.38671
0.08258	1.38796	0.10839	1.38796	0.16516	1.38796
0.08516	1.38921	0.10839	1.38921	0.16258	1.38921
0.10064	1.39046	0.10581	1.39046	0.15484	1.39046
0.11097	1.39171	0.10064	1.39171	0.15742	1.39171
0.11097	1.39296	0.10323	1.39296	0.15226	1.39296
0.11355	1.39421	0.10581	1.39421	0.14968	1.39421
0.11613	1.39546	0.11613	1.39546	0.14968	1.39546
0.11613	1.39671	0.11613	1.39671	0.1471	1.39671
0.11871	1.39796	0.11613	1.39796	0.14968	1.39796
0.11871	1.39921	0.12129	1.39921	0.15484	1.39921
0.12387	1.40046	0.12645	1.40046	0.16	1.40046
0.12387	1.40171	0.12645	1.40171	0.15484	1.40171
0.12387	1.40296	0.12645	1.40296	0.15484	1.40296
0.12387	1.40421	0.12645	1.40421	0.1471	1.40421
0.12129	1.40546	0.12645	1.40546	0.14968	1.40546
0.11355	1.40671	0.12645	1.40671	0.14968	1.40671
0.10581	1.40796	0.13161	1.40796	0.1471	1.40796
0.10581	1.40921	0.12129	1.40921	0.1471	1.40921
0.10581	1.41046	0.12387	1.41046	0.14452	1.41046
0.10581	1.41171	0.12387	1.41171	0.14968	1.41171
0.10323	1.41296	0.11871	1.41296	0.14968	1.41296
0.10839	1.41421	0.12129	1.41421	0.14968	1.41421
0.10839	1.41546	0.12387	1.41546	0.13936	1.41546
0.11097	1.41671	0.11871	1.41671	0.13677	1.41671
0.11355	1.41796	0.11871	1.41796	0.13677	1.41796
0.11613	1.41921	0.11871	1.41921	0.13419	1.41921
0.11871	1.42046	0.11871	1.42046	0.13936	1.42046
0.11871	1.42171	0.12129	1.42171	0.14452	1.42171
0.11871	1.42296	0.11613	1.42296	0.14452	1.42296
0.12129	1.42421	0.10839	1.42421	0.1471	1.42421
0.11613	1.42546	0.10323	1.42546	0.1471	1.42546
0.11355	1.42671	0.10323	1.42671	0.1471	1.42671
0.11097	1.42796	0.10323	1.42796	0.1471	1.42796
0.10064	1.42921	0.10323	1.42921	0.14968	1.42921
0.09548	1.43046	0.10064	1.43046	0.15226	1.43046
0.09806	1.43171	0.10064	1.43171	0.15484	1.43171
0.10064	1.43296	0.10581	1.43296	0.15226	1.43296
0.10064	1.43421	0.09806	1.43421	0.15484	1.43421
0.10064	1.43546	0.09548	1.43546	0.15226	1.43546
0.09806	1.43671	0.10064	1.43671	0.14968	1.43671
0.09806	1.43796	0.09806	1.43796	0.14452	1.43796
0.0929	1.43921	0.09548	1.43921	0.14194	1.43921
0.09548	1.44046	0.0929	1.44046	0.14194	1.44046
0.0929	1.44171	0.0929	1.44171	0.13936	1.44171
0.09548	1.44296	0.0929	1.44296	0.14194	1.44296
0.09806	1.44421	0.0929	1.44421	0.13936	1.44421
0.10839	1.44546	0.09032	1.44546	0.13936	1.44546
0.11097	1.44671	0.0929	1.44671	0.13677	1.44671
0.10581	1.44796	0.09548	1.44796	0.13677	1.44796
0.10581	1.44921	0.0929	1.44921	0.13677	1.44921
0.10839	1.45046	0.0929	1.45046	0.13419	1.45046
0.11097	1.45171	0.0929	1.45171	0.13677	1.45171
0.10323	1.45296	0.09548	1.45296	0.13161	1.45296
0.10581	1.45421	0.09548	1.45421	0.13677	1.45421
0.10581	1.45546	0.09548	1.45546	0.13936	1.45546
0.10064	1.45671	0.09032	1.45671	0.14194	1.45671
0.10064	1.45796	0.0929	1.45796	0.1471	1.45796
0.10064	1.45921	0.0929	1.45921	0.14452	1.45921
0.10323	1.46046	0.09548	1.46046	0.13419	1.46046
0.11355	1.46171	0.09548	1.46171	0.13677	1.46171
0.11097	1.46296	0.10064	1.46296	0.12903	1.46296
0.11097	1.46421	0.10581	1.46421	0.13419	1.46421
0.11097	1.46546	0.10839	1.46546	0.13419	1.46546
0.11355	1.46671	0.10839	1.46671	0.13677	1.46671
0.10839	1.46796	0.10581	1.46796	0.13419	1.46796
0.10323	1.46921	0.10839	1.46921	0.12903	1.46921
0.10323	1.47046	0.10581	1.47046	0.12645	1.47046
0.09806	1.47171	0.10064	1.47171	0.13161	1.47171
0.09806	1.47296	0.10064	1.47296	0.12903	1.47296
0.10064	1.47421	0.09548	1.47421	0.12645	1.47421
0.10064	1.47546	0.09032	1.47546	0.13419	1.47546
0.10581	1.47671	0.0929	1.47671	0.13161	1.47671
0.10581	1.47796	0.0929	1.47796	0.13161	1.47796
0.10064	1.47921	0.0929	1.47921	0.12903	1.47921
0.10064	1.48046	0.09806	1.48046	0.12903	1.48046
0.09806	1.48171	0.09806	1.48171	0.13161	1.48171
0.09548	1.48296	0.09806	1.48296	0.13419	1.48296
0.08516	1.48421	0.10064	1.48421	0.12903	1.48421
0.08258	1.48546	0.10064	1.48546	0.12903	1.48546
0.09032	1.48671	0.10323	1.48671	0.13161	1.48671
0.0929	1.48796	0.10323	1.48796	0.13419	1.48796
0.08774	1.48921	0.10064	1.48921	0.12903	1.48921
0.08258	1.49046	0.10064	1.49046	0.13677	1.49046
0.08258	1.49171	0.10323	1.49171	0.14194	1.49171
0.08516	1.49296	0.10064	1.49296	0.14194	1.49296
0.08516	1.49421	0.10064	1.49421	0.14194	1.49421
0.08258	1.49546	0.10581	1.49546	0.13677	1.49546
0.08516	1.49671	0.10581	1.49671	0.13677	1.49671
0.08516	1.49796	0.10839	1.49796	0.13936	1.49796
0.08258	1.49921	0.10581	1.49921	0.13677	1.49921
0.07484	1.50046	0.11355	1.50046	0.13936	1.50046
0.07226	1.50171	0.11355	1.50171	0.13677	1.50171
0.07226	1.50296	0.10839	1.50296	0.12903	1.50296
0.07226	1.50421	0.10839	1.50421	0.12903	1.50421
0.0671	1.50545	0.11613	1.50545	0.12387	1.50545
0.0671	1.5067	0.11613	1.5067	0.12903	1.5067
0.06452	1.50795	0.11355	1.50795	0.12645	1.50795
0.06194	1.5092	0.11355	1.5092	0.12903	1.5092
0.06194	1.51045	0.11355	1.51045	0.12903	1.51045
0.05936	1.5117	0.11097	1.5117	0.13161	1.5117
0.05677	1.51295	0.11355	1.51295	0.12903	1.51295
0.05936	1.5142	0.11355	1.5142	0.12387	1.5142
0.05161	1.51545	0.11097	1.51545	0.13161	1.51545
0.05161	1.5167	0.11097	1.5167	0.12645	1.5167
0.05419	1.51795	0.10839	1.51795	0.12903	1.51795
0.05677	1.5192	0.10064	1.5192	0.12903	1.5192
0.06194	1.52045	0.10323	1.52045	0.12645	1.52045
0.06194	1.5217	0.09806	1.5217	0.12645	1.5217
0.0671	1.52295	0.10064	1.52295	0.13161	1.52295
0.06452	1.5242	0.0929	1.5242	0.13419	1.5242
0.06194	1.52545	0.09032	1.52545	0.12903	1.52545
0.06194	1.5267	0.0929	1.5267	0.12387	1.5267
0.06194	1.52795	0.0929	1.52795	0.12645	1.52795
0.06194	1.5292	0.09806	1.5292	0.11871	1.5292
0.06452	1.53045	0.09032	1.53045	0.11355	1.53045
0.06194	1.5317	0.0929	1.5317	0.11355	1.5317
0.06194	1.53295	0.0929	1.53295	0.11355	1.53295
0.06194	1.5342	0.08774	1.5342	0.11613	1.5342
0.05677	1.53545	0.08516	1.53545	0.12129	1.53545
0.05419	1.5367	0.08258	1.5367	0.11613	1.5367
0.05936	1.53795	0.07742	1.53795	0.11871	1.53795
0.06194	1.5392	0.0671	1.5392	0.11871	1.5392
0.06452	1.54045	0.06194	1.54045	0.12387	1.54045
0.06452	1.5417	0.05936	1.5417	0.12129	1.5417
0.06194	1.54295	0.05677	1.54295	0.12129	1.54295
0.06452	1.5442	0.04903	1.5442	0.13419	1.5442
0.06194	1.54545	0.04903	1.54545	0.12903	1.54545
0.06194	1.5467	0.04645	1.5467	0.13677	1.5467
0.06452	1.54795	0.04645	1.54795	0.13419	1.54795
0.06452	1.5492	0.04645	1.5492	0.12903	1.5492
0.0671	1.55045	0.05161	1.55045	0.12387	1.55045
0.0671	1.5517	0.05161	1.5517	0.12903	1.5517
0.06452	1.55295	0.05161	1.55295	0.13161	1.55295
0.0671	1.5542	0.05161	1.5542	0.12903	1.5542
0.0671	1.55545	0.05161	1.55545	0.13419	1.55545
0.06452	1.5567	0.05161	1.5567	0.13936	1.5567
0.06452	1.55795	0.05161	1.55795	0.14194	1.55795
0.05936	1.5592	0.05677	1.5592	0.14452	1.5592
0.05936	1.56045	0.05936	1.56045	0.14194	1.56045
0.05677	1.5617	0.05936	1.5617	0.14452	1.5617
0.05936	1.56295	0.06194	1.56295	0.1471	1.56295
0.05419	1.5642	0.05936	1.5642	0.1471	1.5642
0.05161	1.56545	0.05419	1.56545	0.15484	1.56545
0.05677	1.5667	0.05677	1.5667	0.15484	1.5667
0.05936	1.56795	0.05161	1.56795	0.14968	1.56795
0.05936	1.5692	0.05161	1.5692	0.15484	1.5692
0.06194	1.57045	0.05161	1.57045	0.16	1.57045
0.05936	1.5717	0.05161	1.5717	0.16258	1.5717
0.05936	1.57295	0.05419	1.57295	0.16	1.57295
0.05936	1.5742	0.05419	1.5742	0.15742	1.5742
0.06194	1.57545	0.05419	1.57545	0.15484	1.57545
0.05677	1.5767	0.05677	1.5767	0.15484	1.5767
0.05419	1.57795	0.05677	1.57795	0.15226	1.57795
0.05677	1.5792	0.05677	1.5792	0.14968	1.5792
0.05936	1.58045	0.05936	1.58045	0.15484	1.58045
0.05936	1.5817	0.06968	1.5817	0.15226	1.5817
0.05677	1.58295	0.0671	1.58295	0.13936	1.58295
0.05677	1.5842	0.0671	1.5842	0.15226	1.5842
0.05677	1.58545	0.06968	1.58545	0.1471	1.58545
0.05936	1.5867	0.0671	1.5867	0.14968	1.5867
0.05677	1.58795	0.0671	1.58795	0.14968	1.58795
0.05677	1.5892	0.06452	1.5892	0.15226	1.5892
0.05936	1.59045	0.06452	1.59045	0.15226	1.59045
0.05677	1.5917	0.06194	1.5917	0.15226	1.5917
0.05419	1.59295	0.05936	1.59295	0.1471	1.59295
0.05419	1.5942	0.05677	1.5942	0.14194	1.5942
0.05161	1.59545	0.05677	1.59545	0.13677	1.59545
0.04903	1.5967	0.05936	1.5967	0.13161	1.5967
0.04903	1.59795	0.05161	1.59795	0.13419	1.59795
0.05161	1.5992	0.05161	1.5992	0.13419	1.5992
0.05161	1.60045	0.04903	1.60045	0.12903	1.60045
0.04903	1.6017	0.04903	1.6017	0.12387	1.6017
0.05161	1.60295	0.04903	1.60295	0.12387	1.60295
0.05161	1.6042	0.05161	1.6042	0.11871	1.6042
0.05161	1.60545	0.05161	1.60545	0.11613	1.60545
0.05161	1.6067	0.05161	1.6067	0.11871	1.6067
0.04903	1.60795	0.05419	1.60795	0.11355	1.60795
0.04903	1.6092	0.05161	1.6092	0.10839	1.6092
0.05677	1.61045	0.05419	1.61045	0.10839	1.61045
0.05677	1.6117	0.05161	1.6117	0.10839	1.6117
0.05936	1.61295	0.05161	1.61295	0.10581	1.61295
0.05677	1.6142	0.05161	1.6142	0.11097	1.6142
0.05677	1.61545	0.05161	1.61545	0.10839	1.61545
0.05936	1.6167	0.05161	1.6167	0.11097	1.6167
0.05419	1.61795	0.05161	1.61795	0.11355	1.61795
0.05419	1.6192	0.04903	1.6192	0.10839	1.6192
0.05677	1.62045	0.03871	1.62045	0.10581	1.62045
0.05936	1.6217	0.04645	1.6217	0.10839	1.6217
0.06194	1.62295	0.04903	1.62295	0.0929	1.62295
0.06194	1.6242	0.04903	1.6242	0.08774	1.6242
0.05677	1.62545	0.05161	1.62545	0.08516	1.62545
0.05677	1.6267	0.05419	1.6267	0.09548	1.6267
0.05677	1.62795	0.05161	1.62795	0.0929	1.62795
0.05419	1.6292	0.04903	1.6292	0.08774	1.6292
0.05419	1.63045	0.05161	1.63045	0.08774	1.63045
0.05677	1.6317	0.05161	1.6317	0.08774	1.6317
0.05677	1.63295	0.05677	1.63295	0.0929	1.63295
0.06194	1.6342	0.05936	1.6342	0.0929	1.6342
0.06194	1.63545	0.05677	1.63545	0.09806	1.63545
0.06452	1.6367	0.06452	1.6367	0.0929	1.6367
0.0671	1.63795	0.06452	1.63795	0.09548	1.63795
0.06452	1.6392	0.0671	1.6392	0.0929	1.6392
0.07226	1.64045	0.0671	1.64045	0.0929	1.64045
0.06968	1.6417	0.06968	1.6417	0.09548	1.6417
0.06968	1.64295	0.0671	1.64295	0.09548	1.64295
0.06452	1.6442	0.06452	1.6442	0.0929	1.6442
0.06452	1.64545	0.06452	1.64545	0.0929	1.64545
0.0671	1.6467	0.06452	1.6467	0.09806	1.6467
0.06194	1.64795	0.06968	1.64795	0.09548	1.64795
0.05419	1.6492	0.0671	1.6492	0.09032	1.6492
0.05419	1.65045	0.0671	1.65045	0.09032	1.65045
0.05419	1.6517	0.07484	1.6517	0.08774	1.6517
0.05677	1.65295	0.07484	1.65295	0.08258	1.65295
0.06452	1.6542	0.07226	1.6542	0.0929	1.6542
0.06194	1.65545	0.07226	1.65545	0.09032	1.65545
0.0671	1.6567	0.07484	1.6567	0.09032	1.6567
0.06452	1.65795	0.07484	1.65795	0.0929	1.65795
0.0671	1.6592	0.07484	1.6592	0.09548	1.6592
0.06452	1.66045	0.07226	1.66045	0.0929	1.66045
0.06194	1.6617	0.06968	1.6617	0.0929	1.6617
0.06452	1.66295	0.07484	1.66295	0.10323	1.66295
0.06452	1.6642	0.07226	1.6642	0.10323	1.6642
0.06452	1.66545	0.0671	1.66545	0.09548	1.66545
0.06194	1.6667	0.0671	1.6667	0.09806	1.6667
0.06968	1.66795	0.07484	1.66795	0.10323	1.66795
0.07226	1.6692	0.07226	1.6692	0.09548	1.6692
0.06968	1.67045	0.07484	1.67045	0.09806	1.67045
0.06968	1.6717	0.06968	1.6717	0.0929	1.6717
0.06452	1.67295	0.0671	1.67295	0.0929	1.67295
0.06968	1.6742	0.06452	1.6742	0.0929	1.6742
0.0671	1.67545	0.06194	1.67545	0.09806	1.67545
0.06194	1.6767	0.05936	1.6767	0.09806	1.6767
0.06194	1.67795	0.05419	1.67795	0.09548	1.67795
0.05936	1.6792	0.05677	1.6792	0.09548	1.6792
0.06194	1.68045	0.05419	1.68045	0.09548	1.68045
0.06194	1.6817	0.05936	1.6817	0.09548	1.6817
0.06194	1.68295	0.05936	1.68295	0.10064	1.68295
0.06194	1.6842	0.06194	1.6842	0.09806	1.6842
0.0671	1.68545	0.06968	1.68545	0.0929	1.68545
0.06968	1.6867	0.0671	1.6867	0.10064	1.6867
0.07226	1.68795	0.06968	1.68795	0.10323	1.68795
0.07226	1.6892	0.08	1.6892	0.10323	1.6892
0.06968	1.69045	0.07226	1.69045	0.10581	1.69045
0.07226	1.6917	0.06968	1.6917	0.10581	1.6917
0.06968	1.69295	0.07226	1.69295	0.10323	1.69295
0.06968	1.6942	0.07484	1.6942	0.10323	1.6942
0.06452	1.69545	0.07484	1.69545	0.10839	1.69545
0.06452	1.6967	0.07484	1.6967	0.10581	1.6967
0.06194	1.69795	0.07484	1.69795	0.10323	1.69795
0.06452	1.6992	0.06968	1.6992	0.10839	1.6992
0.06968	1.70045	0.07226	1.70045	0.11355	1.70045
0.0671	1.7017	0.0671	1.7017	0.11355	1.7017
0.06968	1.70295	0.06968	1.70295	0.11097	1.70295
0.07226	1.7042	0.06968	1.7042	0.10839	1.7042
0.07226	1.70545	0.07742	1.70545	0.10839	1.70545
0.0671	1.7067	0.07742	1.7067	0.10839	1.7067
0.06452	1.70795	0.08	1.70795	0.10839	1.70795
0.06452	1.7092	0.08258	1.7092	0.10581	1.7092
0.06968	1.71045	0.08258	1.71045	0.11097	1.71045
0.06968	1.7117	0.08774	1.7117	0.10839	1.7117
0.0671	1.71295	0.0929	1.71295	0.10581	1.71295
0.0671	1.7142	0.0929	1.7142	0.09806	1.7142
0.0671	1.71545	0.09548	1.71545	0.09806	1.71545
0.06968	1.7167	0.09806	1.7167	0.10064	1.7167
0.0671	1.71795	0.0929	1.71795	0.10064	1.71795
0.06452	1.7192	0.09548	1.7192	0.10323	1.7192
0.0671	1.72045	0.0929	1.72045	0.10323	1.72045
0.06968	1.7217	0.09548	1.7217	0.10064	1.7217
0.07484	1.72295	0.09548	1.72295	0.10064	1.72295
0.06968	1.7242	0.08516	1.7242	0.10581	1.7242
0.0671	1.72545	0.09032	1.72545	0.09806	1.72545
0.0671	1.7267	0.09032	1.7267	0.09806	1.7267
0.0671	1.72795	0.08516	1.72795	0.10323	1.72795
0.07226	1.7292	0.08774	1.7292	0.10064	1.7292
0.0671	1.73045	0.08774	1.73045	0.10323	1.73045
0.06194	1.7317	0.09032	1.7317	0.09548	1.7317
0.06452	1.73295	0.09032	1.73295	0.09548	1.73295
0.06968	1.7342	0.08774	1.7342	0.08516	1.7342
0.07226	1.73545	0.08774	1.73545	0.08516	1.73545
0.06968	1.7367	0.09032	1.7367	0.08516	1.7367
0.0671	1.73795	0.0929	1.73795	0.08516	1.73795
0.0671	1.7392	0.09032	1.7392	0.08774	1.7392
0.0671	1.74045	0.08774	1.74045	0.08	1.74045
0.06452	1.7417	0.08516	1.7417	0.08	1.7417
0.06194	1.74295	0.08516	1.74295	0.08	1.74295
0.06194	1.7442	0.08258	1.7442	0.07742	1.7442
0.06194	1.74545	0.07484	1.74545	0.08	1.74545
0.06968	1.7467	0.07484	1.7467	0.08	1.7467
0.06968	1.74795	0.06968	1.74795	0.08258	1.74795
0.06452	1.7492	0.07226	1.7492	0.08258	1.7492
0.0671	1.75045	0.06968	1.75045	0.0929	1.75045
0.0671	1.7517	0.06452	1.7517	0.0929	1.7517
0.06452	1.75295	0.0671	1.75295	0.0929	1.75295
0.06968	1.7542	0.0671	1.7542	0.08774	1.7542
0.06968	1.75545	0.0671	1.75545	0.08516	1.75545
0.0671	1.7567	0.07226	1.7567	0.08258	1.7567
0.0671	1.75795	0.07226	1.75795	0.08	1.75795
0.06452	1.7592	0.06968	1.7592	0.08	1.7592
0.0671	1.76045	0.0671	1.76045	0.07742	1.76045
0.06194	1.7617	0.06968	1.7617	0.08	1.7617
0.06194	1.76295	0.06968	1.76295	0.08	1.76295
0.06452	1.7642	0.06194	1.7642	0.08258	1.7642
0.06194	1.76545	0.05936	1.76545	0.08	1.76545
0.06194	1.7667	0.05419	1.7667	0.07226	1.7667
0.05677	1.76795	0.05419	1.76795	0.07742	1.76795
0.05677	1.7692	0.05677	1.7692	0.07742	1.7692
0.05677	1.77045	0.05677	1.77045	0.08	1.77045
0.05419	1.7717	0.05419	1.7717	0.08	1.7717
0.05161	1.77295	0.05936	1.77295	0.08516	1.77295
0.05161	1.7742	0.06452	1.7742	0.09032	1.7742
0.05161	1.77545	0.0671	1.77545	0.0929	1.77545
0.05161	1.7767	0.06968	1.7767	0.08774	1.7767
0.04645	1.77795	0.06968	1.77795	0.08258	1.77795
0.04645	1.7792	0.07226	1.7792	0.08	1.7792
0.05161	1.78045	0.07226	1.78045	0.08	1.78045
0.05161	1.7817	0.07484	1.7817	0.08	1.7817
0.05161	1.78295	0.07484	1.78295	0.08	1.78295
0.05419	1.7842	0.07742	1.7842	0.07484	1.7842
0.04903	1.78545	0.07742	1.78545	0.08516	1.78545
0.04903	1.7867	0.07742	1.7867	0.08258	1.7867
0.05677	1.78795	0.07484	1.78795	0.07742	1.78795
0.05419	1.7892	0.07484	1.7892	0.0671	1.7892
0.05161	1.79045	0.07484	1.79045	0.06968	1.79045
0.05419	1.7917	0.07484	1.7917	0.06968	1.7917
0.04903	1.79295	0.07226	1.79295	0.06968	1.79295
0.04645	1.7942	0.07484	1.7942	0.07226	1.7942
0.04645	1.79545	0.07226	1.79545	0.07742	1.79545
0.05161	1.7967	0.06968	1.7967	0.08	1.7967
0.05419	1.79795	0.06968	1.79795	0.08	1.79795
0.04903	1.7992	0.06968	1.7992	0.08	1.7992
0.04645	1.80045	0.0671	1.80045	0.08	1.80045
0.04903	1.8017	0.0671	1.8017	0.08	1.8017
0.04645	1.80295	0.07226	1.80295	0.07742	1.80295
0.05419	1.8042	0.07226	1.8042	0.08516	1.8042
0.05936	1.80545	0.07742	1.80545	0.08516	1.80545
0.0671	1.8067	0.08	1.8067	0.08516	1.8067
0.0671	1.80795	0.08258	1.80795	0.08258	1.80795
0.06968	1.8092	0.07742	1.8092	0.08258	1.8092
0.0671	1.81045	0.08	1.81045	0.08516	1.81045
0.0671	1.8117	0.08	1.8117	0.08258	1.8117
0.0671	1.81295	0.07484	1.81295	0.08	1.81295
0.0671	1.8142	0.08	1.8142	0.08258	1.8142
0.0671	1.81545	0.07484	1.81545	0.09032	1.81545
0.0671	1.8167	0.07484	1.8167	0.09806	1.8167
0.0671	1.81795	0.07226	1.81795	0.10064	1.81795
0.06194	1.8192	0.07226	1.8192	0.10839	1.8192
0.06194	1.82045	0.07226	1.82045	0.11355	1.82045
0.06452	1.8217	0.06968	1.8217	0.11355	1.8217
0.05936	1.82295	0.0671	1.82295	0.11613	1.82295
0.05936	1.8242	0.0671	1.8242	0.10839	1.8242
0.05936	1.82545	0.06968	1.82545	0.11097	1.82545
0.05161	1.8267	0.06968	1.8267	0.11613	1.8267
0.05677	1.82795	0.0671	1.82795	0.11871	1.82795
0.05677	1.8292	0.0671	1.8292	0.11613	1.8292
0.05677	1.83045	0.06194	1.83045	0.12387	1.83045
0.05936	1.8317	0.06194	1.8317	0.12645	1.8317
0.06194	1.83295	0.05677	1.83295	0.12387	1.83295
0.06194	1.8342	0.05419	1.8342	0.12645	1.8342
0.06194	1.83544	0.05419	1.83544	0.12645	1.83544
0.06194	1.8367	0.05936	1.8367	0.12645	1.8367
0.06452	1.83794	0.0671	1.83794	0.12645	1.83794
0.0671	1.83919	0.06452	1.83919	0.12387	1.83919
0.06452	1.84044	0.0671	1.84044	0.12129	1.84044
0.06452	1.84169	0.06452	1.84169	0.12645	1.84169
0.05936	1.84294	0.06452	1.84294	0.12129	1.84294
0.05419	1.84419	0.05936	1.84419	0.12387	1.84419
0.04645	1.84544	0.05936	1.84544	0.11871	1.84544
0.05161	1.84669	0.05419	1.84669	0.12129	1.84669
0.05161	1.84794	0.05419	1.84794	0.12645	1.84794
0.05161	1.84919	0.05161	1.84919	0.12387	1.84919
0.05161	1.85044	0.04645	1.85044	0.12645	1.85044
0.04903	1.85169	0.04903	1.85169	0.12903	1.85169
0.05419	1.85294	0.04387	1.85294	0.12387	1.85294
0.05419	1.85419	0.05161	1.85419	0.12645	1.85419
0.05936	1.85544	0.05677	1.85544	0.11871	1.85544
0.05677	1.85669	0.05677	1.85669	0.11871	1.85669
0.05936	1.85794	0.05677	1.85794	0.11613	1.85794
0.05936	1.85919	0.06194	1.85919	0.11097	1.85919
0.05936	1.86044	0.05936	1.86044	0.10839	1.86044
0.05936	1.86169	0.05936	1.86169	0.10581	1.86169
0.05677	1.86294	0.06194	1.86294	0.11097	1.86294
0.05936	1.86419	0.05936	1.86419	0.11355	1.86419
0.06194	1.86544	0.06194	1.86544	0.11355	1.86544
0.05677	1.86669	0.06194	1.86669	0.11355	1.86669
0.06452	1.86794	0.06194	1.86794	0.11613	1.86794
0.06194	1.86919	0.06452	1.86919	0.10839	1.86919
0.06194	1.87044	0.0671	1.87044	0.11097	1.87044
0.05936	1.87169	0.06968	1.87169	0.11613	1.87169
0.06194	1.87294	0.06968	1.87294	0.11355	1.87294
0.05677	1.87419	0.06968	1.87419	0.11097	1.87419
0.05419	1.87544	0.0671	1.87544	0.11097	1.87544
0.05161	1.87669	0.06194	1.87669	0.11613	1.87669
0.05161	1.87794	0.06452	1.87794	0.11871	1.87794
0.05677	1.87919	0.06194	1.87919	0.12129	1.87919
0.05677	1.88044	0.05936	1.88044	0.11355	1.88044
0.05419	1.88169	0.06194	1.88169	0.11097	1.88169
0.05677	1.88294	0.06452	1.88294	0.11097	1.88294
0.05677	1.88419	0.05936	1.88419	0.11355	1.88419
0.05161	1.88544	0.06452	1.88544	0.11613	1.88544
0.05419	1.88669	0.0671	1.88669	0.11355	1.88669
0.05677	1.88794	0.06968	1.88794	0.11097	1.88794
0.05419	1.88919	0.07484	1.88919	0.10581	1.88919
0.05677	1.89044	0.07484	1.89044	0.10323	1.89044
0.05419	1.89169	0.06968	1.89169	0.10839	1.89169
0.05419	1.89294	0.06194	1.89294	0.09806	1.89294
0.04903	1.89419	0.05936	1.89419	0.09806	1.89419
0.05161	1.89544	0.06194	1.89544	0.10323	1.89544
0.04903	1.89669	0.06452	1.89669	0.09806	1.89669
0.04903	1.89794	0.06452	1.89794	0.10064	1.89794
0.04903	1.89919	0.06452	1.89919	0.10064	1.89919
0.05419	1.90044	0.0671	1.90044	0.09806	1.90044
0.05419	1.90169	0.06452	1.90169	0.09806	1.90169
0.05161	1.90294	0.06452	1.90294	0.0929	1.90294
0.04903	1.90419	0.06194	1.90419	0.09032	1.90419
0.04903	1.90544	0.06452	1.90544	0.08774	1.90544
0.04387	1.90669	0.06452	1.90669	0.08774	1.90669
0.04387	1.90794	0.0671	1.90794	0.09548	1.90794
0.04129	1.90919	0.06968	1.90919	0.09032	1.90919
0.04129	1.91044	0.0671	1.91044	0.0929	1.91044
0.03871	1.91169	0.06968	1.91169	0.09548	1.91169
0.04645	1.91294	0.06968	1.91294	0.0929	1.91294
0.04903	1.91419	0.07484	1.91419	0.09548	1.91419
0.04903	1.91544	0.07226	1.91544	0.09032	1.91544
0.04903	1.91669	0.07484	1.91669	0.09032	1.91669
0.04129	1.91794	0.07484	1.91794	0.08774	1.91794
0.04129	1.91919	0.07484	1.91919	0.08774	1.91919
0.04387	1.92044	0.07742	1.92044	0.09032	1.92044
0.04903	1.92169	0.07484	1.92169	0.08774	1.92169
0.05161	1.92294	0.07484	1.92294	0.08516	1.92294
0.05161	1.92419	0.07226	1.92419	0.08	1.92419
0.04903	1.92544	0.06968	1.92544	0.07742	1.92544
0.04645	1.92669	0.06968	1.92669	0.08258	1.92669
0.04903	1.92794	0.06452	1.92794	0.08258	1.92794
0.04645	1.92919	0.06194	1.92919	0.08	1.92919
0.04645	1.93044	0.06452	1.93044	0.08	1.93044
0.04645	1.93169	0.06452	1.93169	0.08258	1.93169
0.04903	1.93294	0.06194	1.93294	0.08	1.93294
0.04645	1.93419	0.06194	1.93419	0.07484	1.93419
0.04645	1.93544	0.06194	1.93544	0.08	1.93544
0.04903	1.93669	0.05677	1.93669	0.08	1.93669
0.05161	1.93794	0.05677	1.93794	0.08	1.93794
0.04645	1.93919	0.05419	1.93919	0.08	1.93919
0.04903	1.94044	0.05161	1.94044	0.07226	1.94044
0.05161	1.94169	0.05161	1.94169	0.07484	1.94169
0.05161	1.94294	0.05677	1.94294	0.07742	1.94294
0.05419	1.94419	0.05677	1.94419	0.07742	1.94419
0.05161	1.94544	0.05677	1.94544	0.07484	1.94544
0.05419	1.94669	0.04903	1.94669	0.06968	1.94669
0.05419	1.94794	0.04387	1.94794	0.07484	1.94794
0.05677	1.94919	0.04387	1.94919	0.0671	1.94919
0.05677	1.95044	0.04129	1.95044	0.06194	1.95044
0.04903	1.95169	0.04129	1.95169	0.06194	1.95169
0.04903	1.95294	0.03355	1.95294	0.06194	1.95294
0.05419	1.95419	0.03613	1.95419	0.06452	1.95419
0.05161	1.95544	0.03097	1.95544	0.06194	1.95544
0.05419	1.95669	0.03355	1.95669	0.05936	1.95669
0.05936	1.95794	0.03613	1.95794	0.06452	1.95794
0.05677	1.95919	0.03097	1.95919	0.06194	1.95919
0.05161	1.96044	0.03355	1.96044	0.0671	1.96044
0.04903	1.96169	0.03613	1.96169	0.0671	1.96169
0.04903	1.96294	0.03355	1.96294	0.06968	1.96294
0.04645	1.96419	0.03613	1.96419	0.06968	1.96419
0.04645	1.96544	0.03871	1.96544	0.07484	1.96544
0.04387	1.96669	0.03871	1.96669	0.07742	1.96669
0.04387	1.96794	0.04129	1.96794	0.08	1.96794
0.04129	1.96919	0.03871	1.96919	0.07484	1.96919
0.04129	1.97044	0.04129	1.97044	0.07226	1.97044
0.03871	1.97169	0.04387	1.97169	0.07226	1.97169
0.03871	1.97294	0.04129	1.97294	0.06968	1.97294
0.04129	1.97419	0.04129	1.97419	0.06452	1.97419
0.03871	1.97544	0.04387	1.97544	0.06194	1.97544
0.03355	1.97669	0.04387	1.97669	0.06194	1.97669
0.03355	1.97794	0.04387	1.97794	0.06194	1.97794
0.03355	1.97919	0.04387	1.97919	0.07226	1.97919
0.03097	1.98044	0.04645	1.98044	0.06968	1.98044
0.03097	1.98169	0.04129	1.98169	0.0671	1.98169
0.02839	1.98294	0.04129	1.98294	0.0671	1.98294
0.02839	1.98419	0.04129	1.98419	0.0671	1.98419
0.02581	1.98544	0.04129	1.98544	0.0671	1.98544
0.03097	1.98669	0.04129	1.98669	0.0671	1.98669
0.02839	1.98794	0.04387	1.98794	0.06968	1.98794
0.02839	1.98919	0.04903	1.98919	0.06968	1.98919
0.03355	1.99044	0.04903	1.99044	0.07484	1.99044
0.03097	1.99169	0.05161	1.99169	0.07226	1.99169
0.02581	1.99294	0.04903	1.99294	0.07226	1.99294
0.03097	1.99419	0.05419	1.99419	0.07226	1.99419
0.03097	1.99544	0.05161	1.99544	0.07226	1.99544
0.02839	1.99669	0.04903	1.99669	0.06968	1.99669
0.03097	1.99794	0.05419	1.99794	0.07742	1.99794
0.02839	1.99919	0.05161	1.99919	0.07226	1.99919
0.02839	2.00044	0.05161	2.00044	0.06968	2.00044
0.02839	2.00169	0.05419	2.00169	0.07226	2.00169
0.02839	2.00294	0.05161	2.00294	0.06968	2.00294
0.03097	2.00419	0.04903	2.00419	0.06194	2.00419
0.03097	2.00544	0.05161	2.00544	0.06194	2.00544
0.03097	2.00669	0.05161	2.00669	0.05936	2.00669
0.03097	2.00794	0.05419	2.00794	0.05936	2.00794
0.03097	2.00919	0.05161	2.00919	0.06194	2.00919
0.03097	2.01044	0.05161	2.01044	0.06452	2.01044
0.03355	2.01169	0.05419	2.01169	0.0671	2.01169
0.03097	2.01294	0.05161	2.01294	0.0671	2.01294
0.03097	2.01419	0.04645	2.01419	0.06968	2.01419
0.03097	2.01544	0.04645	2.01544	0.07226	2.01544
0.03097	2.01669	0.05419	2.01669	0.07484	2.01669
0.02839	2.01794	0.05419	2.01794	0.06968	2.01794
0.02839	2.01919	0.05161	2.01919	0.07226	2.01919
0.02839	2.02044	0.05161	2.02044	0.06968	2.02044
0.02839	2.02169	0.04903	2.02169	0.06968	2.02169
0.02839	2.02294	0.04903	2.02294	0.0671	2.02294
0.03097	2.02419	0.04903	2.02419	0.06452	2.02419
0.02839	2.02544	0.04903	2.02544	0.06194	2.02544
0.02839	2.02669	0.04903	2.02669	0.05936	2.02669
0.02839	2.02794	0.04645	2.02794	0.06194	2.02794
0.02323	2.02919	0.04645	2.02919	0.06194	2.02919
0.02581	2.03044	0.04387	2.03044	0.06452	2.03044
0.02581	2.03169	0.04387	2.03169	0.06194	2.03169
0.02323	2.03294	0.03871	2.03294	0.06194	2.03294
0.02064	2.03419	0.04129	2.03419	0.06194	2.03419
0.02064	2.03544	0.04645	2.03544	0.05936	2.03544
0.01806	2.03669	0.04387	2.03669	0.05419	2.03669
0.01806	2.03794	0.04387	2.03794	0.05419	2.03794
0.01806	2.03919	0.04387	2.03919	0.05936	2.03919
0.02064	2.04044	0.04387	2.04044	0.05419	2.04044
0.02064	2.04169	0.04387	2.04169	0.05677	2.04169
0.01806	2.04294	0.04387	2.04294	0.05677	2.04294
0.01806	2.04419	0.04129	2.04419	0.05419	2.04419
0.01806	2.04544	0.04387	2.04544	0.05419	2.04544
0.02581	2.04669	0.04129	2.04669	0.05677	2.04669
0.03097	2.04794	0.04129	2.04794	0.05677	2.04794
0.03097	2.04919	0.03871	2.04919	0.05677	2.04919
0.02839	2.05044	0.03613	2.05044	0.05419	2.05044
0.02839	2.05169	0.03613	2.05169	0.05936	2.05169
0.03355	2.05294	0.03613	2.05294	0.05936	2.05294
0.03613	2.05419	0.03871	2.05419	0.05936	2.05419
0.03613	2.05544	0.03355	2.05544	0.05677	2.05544
0.03613	2.05669	0.03355	2.05669	0.05419	2.05669
0.03613	2.05794	0.03355	2.05794	0.05419	2.05794
0.03613	2.05919	0.03613	2.05919	0.05419	2.05919
0.03871	2.06044	0.03613	2.06044	0.05419	2.06044
0.03871	2.06169	0.03871	2.06169	0.05677	2.06169
0.04129	2.06294	0.04129	2.06294	0.06452	2.06294
0.03871	2.06419	0.04387	2.06419	0.06452	2.06419
0.03871	2.06544	0.04645	2.06544	0.06452	2.06544
0.03871	2.06669	0.04387	2.06669	0.06194	2.06669
0.03871	2.06794	0.04903	2.06794	0.05677	2.06794
0.03613	2.06919	0.04903	2.06919	0.05419	2.06919
0.03871	2.07044	0.04903	2.07044	0.05419	2.07044
0.04387	2.07169	0.04903	2.07169	0.05419	2.07169
0.04645	2.07294	0.04645	2.07294	0.05419	2.07294
0.04645	2.07419	0.04129	2.07419	0.05677	2.07419
0.04903	2.07544	0.04129	2.07544	0.05677	2.07544
0.05161	2.07669	0.04129	2.07669	0.05936	2.07669
0.05161	2.07794	0.04129	2.07794	0.05677	2.07794
0.05161	2.07919	0.03871	2.07919	0.06194	2.07919
0.05419	2.08044	0.03871	2.08044	0.05936	2.08044
0.05677	2.08169	0.03613	2.08169	0.05677	2.08169
0.05677	2.08294	0.03613	2.08294	0.05677	2.08294
0.05677	2.08419	0.03097	2.08419	0.05677	2.08419
0.04903	2.08544	0.03097	2.08544	0.05419	2.08544
0.04387	2.08669	0.03097	2.08669	0.05161	2.08669
0.04645	2.08794	0.03613	2.08794	0.05677	2.08794
0.04645	2.08919	0.03871	2.08919	0.05936	2.08919
0.04645	2.09044	0.03871	2.09044	0.05936	2.09044
0.04387	2.09169	0.04129	2.09169	0.05677	2.09169
0.04129	2.09294	0.04129	2.09294	0.05677	2.09294
0.04129	2.09419	0.03871	2.09419	0.05936	2.09419
0.04129	2.09544	0.04129	2.09544	0.06194	2.09544
0.04387	2.09669	0.04387	2.09669	0.06452	2.09669
0.04387	2.09794	0.04387	2.09794	0.0671	2.09794
0.04129	2.09919	0.04387	2.09919	0.0671	2.09919
0.04387	2.10044	0.04645	2.10044	0.0671	2.10044
0.04129	2.10169	0.04387	2.10169	0.06194	2.10169
0.04129	2.10294	0.04129	2.10294	0.05936	2.10294
0.04129	2.10419	0.03871	2.10419	0.05936	2.10419
0.04387	2.10544	0.03871	2.10544	0.05936	2.10544
0.04903	2.10669	0.03613	2.10669	0.06194	2.10669
0.05419	2.10794	0.03613	2.10794	0.06194	2.10794
0.05161	2.10919	0.03871	2.10919	0.06452	2.10919
0.04387	2.11044	0.03871	2.11044	0.0671	2.11044
0.04387	2.11169	0.04129	2.11169	0.0671	2.11169
0.04129	2.11294	0.04129	2.11294	0.06452	2.11294
0.03871	2.11419	0.03871	2.11419	0.06452	2.11419
0.03613	2.11544	0.03871	2.11544	0.0671	2.11544
0.03613	2.11669	0.03613	2.11669	0.0671	2.11669
0.03355	2.11794	0.03613	2.11794	0.06452	2.11794
0.03097	2.11919	0.03871	2.11919	0.0671	2.11919
0.02839	2.12044	0.03871	2.12044	0.06968	2.12044
0.03097	2.12169	0.04387	2.12169	0.06968	2.12169
0.03097	2.12294	0.04645	2.12294	0.06968	2.12294
0.03097	2.12419	0.05419	2.12419	0.06968	2.12419
0.03097	2.12544	0.05677	2.12544	0.07742	2.12544
0.02839	2.12669	0.05419	2.12669	0.07484	2.12669
0.02839	2.12794	0.05161	2.12794	0.07484	2.12794
0.02839	2.12919	0.05419	2.12919	0.07226	2.12919
0.03097	2.13044	0.05161	2.13044	0.07484	2.13044
0.03097	2.13169	0.05161	2.13169	0.07484	2.13169
0.03097	2.13294	0.05419	2.13294	0.07226	2.13294
0.03355	2.13419	0.05161	2.13419	0.0671	2.13419
0.03097	2.13544	0.04903	2.13544	0.06452	2.13544
0.03355	2.13669	0.04645	2.13669	0.06194	2.13669
0.03355	2.13794	0.04645	2.13794	0.06194	2.13794
0.03355	2.13919	0.04129	2.13919	0.05936	2.13919
0.03097	2.14044	0.04387	2.14044	0.05936	2.14044
0.03355	2.14169	0.04645	2.14169	0.05936	2.14169
0.03613	2.14294	0.04645	2.14294	0.05936	2.14294
0.03355	2.14419	0.04645	2.14419	0.05677	2.14419
0.02839	2.14544	0.04387	2.14544	0.05677	2.14544
0.02323	2.14669	0.04645	2.14669	0.06194	2.14669
0.02323	2.14794	0.04645	2.14794	0.06194	2.14794
0.02323	2.14919	0.04645	2.14919	0.05936	2.14919
0.02064	2.15044	0.04387	2.15044	0.06194	2.15044
0.02064	2.15169	0.04645	2.15169	0.06194	2.15169
0.02064	2.15294	0.04645	2.15294	0.06194	2.15294
0.02064	2.15419	0.04903	2.15419	0.05677	2.15419
0.02323	2.15544	0.05161	2.15544	0.05419	2.15544
0.02323	2.15669	0.05677	2.15669	0.05419	2.15669
0.02323	2.15794	0.05419	2.15794	0.05419	2.15794
0.02323	2.15919	0.05677	2.15919	0.05419	2.15919
0.02064	2.16044	0.05161	2.16044	0.05419	2.16044
0.02064	2.16169	0.04903	2.16169	0.05677	2.16169
0.02064	2.16294	0.04129	2.16294	0.05677	2.16294
0.02064	2.16418	0.03871	2.16418	0.04903	2.16418
0.02323	2.16544	0.03613	2.16544	0.04387	2.16544
0.02323	2.16669	0.03871	2.16669	0.04129	2.16669
0.03097	2.16794	0.03613	2.16794	0.03871	2.16794
0.02581	2.16918	0.03613	2.16918	0.03613	2.16918
0.02581	2.17043	0.03355	2.17043	0.03613	2.17043
0.03097	2.17169	0.03097	2.17169	0.03871	2.17169
0.03097	2.17293	0.03355	2.17293	0.04129	2.17293
0.03097	2.17418	0.03613	2.17418	0.03871	2.17418
0.03097	2.17543	0.03871	2.17543	0.04129	2.17543
0.03097	2.17668	0.04129	2.17668	0.04129	2.17668
0.03097	2.17793	0.04387	2.17793	0.04129	2.17793
0.03355	2.17918	0.04645	2.17918	0.04129	2.17918
0.03097	2.18043	0.04903	2.18043	0.04129	2.18043
0.02839	2.18168	0.05161	2.18168	0.04129	2.18168
0.03097	2.18293	0.05161	2.18293	0.04387	2.18293
0.03097	2.18418	0.05161	2.18418	0.04129	2.18418
0.03097	2.18543	0.04903	2.18543	0.03355	2.18543
0.03097	2.18668	0.04645	2.18668	0.03355	2.18668
0.03097	2.18793	0.04903	2.18793	0.03871	2.18793
0.03355	2.18918	0.04903	2.18918	0.03613	2.18918
0.03613	2.19043	0.04645	2.19043	0.03871	2.19043
0.03871	2.19168	0.04903	2.19168	0.03613	2.19168
0.03871	2.19293	0.04645	2.19293	0.03613	2.19293
0.03613	2.19418	0.04645	2.19418	0.03613	2.19418
0.03613	2.19543	0.04387	2.19543	0.03355	2.19543
0.03613	2.19668	0.04387	2.19668	0.03355	2.19668
0.03613	2.19793	0.04387	2.19793	0.03097	2.19793
0.03613	2.19918	0.04645	2.19918	0.03097	2.19918
0.03613	2.20043	0.04645	2.20043	0.02839	2.20043
0.03613	2.20168	0.04903	2.20168	0.02839	2.20168
0.03613	2.20293	0.04903	2.20293	0.03097	2.20293
0.03355	2.20418	0.04903	2.20418	0.03097	2.20418
0.03613	2.20543	0.04645	2.20543	0.03355	2.20543
0.02839	2.20668	0.04903	2.20668	0.03355	2.20668
0.02839	2.20793	0.04903	2.20793	0.03355	2.20793
0.02839	2.20918	0.05161	2.20918	0.03097	2.20918
0.02323	2.21043	0.05161	2.21043	0.02839	2.21043
0.02323	2.21168	0.04903	2.21168	0.02839	2.21168
0.02323	2.21293	0.04903	2.21293	0.03097	2.21293
0.02064	2.21418	0.04645	2.21418	0.03097	2.21418
0.02064	2.21543	0.04387	2.21543	0.03355	2.21543
0.02064	2.21668	0.04645	2.21668	0.03355	2.21668
0.02323	2.21793	0.04129	2.21793	0.03097	2.21793
0.02323	2.21918	0.03613	2.21918	0.03097	2.21918
0.02323	2.22043	0.03097	2.22043	0.03355	2.22043
0.02064	2.22168	0.03355	2.22168	0.03097	2.22168
0.02064	2.22293	0.03355	2.22293	0.03355	2.22293
0.02064	2.22418	0.03613	2.22418	0.03355	2.22418
0.02064	2.22543	0.03613	2.22543	0.03355	2.22543
0.02323	2.22668	0.03613	2.22668	0.03097	2.22668
0.02064	2.22793	0.04129	2.22793	0.03097	2.22793
0.02323	2.22918	0.04645	2.22918	0.02839	2.22918
0.02064	2.23043	0.04903	2.23043	0.02839	2.23043
0.02064	2.23168	0.04903	2.23168	0.03097	2.23168
0.02064	2.23293	0.04645	2.23293	0.03613	2.23293
0.02323	2.23418	0.04645	2.23418	0.03613	2.23418
0.02323	2.23543	0.04645	2.23543	0.03613	2.23543
0.02323	2.23668	0.04387	2.23668	0.03871	2.23668
0.02323	2.23793	0.04387	2.23793	0.03871	2.23793
0.02323	2.23918	0.04387	2.23918	0.03871	2.23918
0.02323	2.24043	0.04387	2.24043	0.04129	2.24043
0.02323	2.24168	0.04645	2.24168	0.04387	2.24168
0.02323	2.24293	0.04903	2.24293	0.04645	2.24293
0.02323	2.24418	0.04903	2.24418	0.04387	2.24418
0.02323	2.24543	0.05419	2.24543	0.04387	2.24543
0.02323	2.24668	0.05419	2.24668	0.04387	2.24668
0.02323	2.24793	0.05161	2.24793	0.04387	2.24793
0.02323	2.24918	0.05419	2.24918	0.04387	2.24918
0.02064	2.25043	0.05419	2.25043	0.04129	2.25043
0.02064	2.25168	0.05161	2.25168	0.04129	2.25168
0.02064	2.25293	0.05419	2.25293	0.03871	2.25293
0.02064	2.25418	0.05677	2.25418	0.03871	2.25418
0.01806	2.25543	0.05677	2.25543	0.03871	2.25543
0.0129	2.25668	0.05936	2.25668	0.04129	2.25668
0.0129	2.25793	0.06194	2.25793	0.04387	2.25793
0.01548	2.25918	0.06194	2.25918	0.04129	2.25918
0.01548	2.26043	0.05936	2.26043	0.04387	2.26043
0.01548	2.26168	0.06194	2.26168	0.04129	2.26168
0.01548	2.26293	0.05936	2.26293	0.04645	2.26293
0.01548	2.26418	0.05936	2.26418	0.04903	2.26418
0.0129	2.26543	0.05677	2.26543	0.04903	2.26543
0.0129	2.26668	0.05677	2.26668	0.05161	2.26668
0.00774	2.26793	0.05161	2.26793	0.05677	2.26793
0.01032	2.26918	0.04645	2.26918	0.05677	2.26918
0.0129	2.27043	0.04645	2.27043	0.05419	2.27043
0.0129	2.27168	0.04645	2.27168	0.05161	2.27168
0.01032	2.27293	0.04387	2.27293	0.05419	2.27293
0.01032	2.27418	0.04387	2.27418	0.05161	2.27418
0.0129	2.27543	0.04387	2.27543	0.04903	2.27543
0.0129	2.27668	0.04129	2.27668	0.05161	2.27668
0.0129	2.27793	0.04129	2.27793	0.05677	2.27793
0.01548	2.27918	0.03871	2.27918	0.05677	2.27918
0.01548	2.28043	0.04387	2.28043	0.05161	2.28043
0.01548	2.28168	0.04387	2.28168	0.04903	2.28168
0.0129	2.28293	0.04645	2.28293	0.04903	2.28293
0.0129	2.28418	0.04387	2.28418	0.04903	2.28418
0.01548	2.28543	0.04645	2.28543	0.05419	2.28543
0.01548	2.28668	0.04645	2.28668	0.05677	2.28668
0.01548	2.28793	0.04387	2.28793	0.05677	2.28793
0.01548	2.28918	0.04387	2.28918	0.05677	2.28918
0.01548	2.29043	0.04387	2.29043	0.05677	2.29043
0.01806	2.29168	0.04387	2.29168	0.05677	2.29168
0.01806	2.29293	0.04129	2.29293	0.05677	2.29293
0.02064	2.29418	0.03613	2.29418	0.05677	2.29418
0.02323	2.29543	0.03613	2.29543	0.05419	2.29543
0.02323	2.29668	0.03355	2.29668	0.05419	2.29668
0.02064	2.29793	0.03355	2.29793	0.05419	2.29793
0.02581	2.29918	0.03355	2.29918	0.05161	2.29918
0.02581	2.30043	0.03355	2.30043	0.05161	2.30043
0.02581	2.30168	0.03613	2.30168	0.05161	2.30168
0.02581	2.30293	0.03613	2.30293	0.04645	2.30293
0.02581	2.30418	0.03613	2.30418	0.04387	2.30418
0.02581	2.30543	0.03097	2.30543	0.04387	2.30543
0.02581	2.30668	0.03613	2.30668	0.03871	2.30668
0.02323	2.30793	0.03613	2.30793	0.03871	2.30793
0.02064	2.30918	0.03613	2.30918	0.04387	2.30918
0.02064	2.31043	0.03871	2.31043	0.04129	2.31043
0.02064	2.31168	0.04387	2.31168	0.03871	2.31168
0.02064	2.31293	0.04387	2.31293	0.03871	2.31293
0.01806	2.31418	0.04387	2.31418	0.03871	2.31418
0.02064	2.31543	0.04387	2.31543	0.03613	2.31543
0.02064	2.31668	0.04387	2.31668	0.03097	2.31668
0.01806	2.31793	0.04387	2.31793	0.03097	2.31793
0.01806	2.31918	0.03613	2.31918	0.03097	2.31918
0.01806	2.32043	0.03355	2.32043	0.03097	2.32043
0.01806	2.32168	0.03097	2.32168	0.03097	2.32168
0.01806	2.32293	0.02839	2.32293	0.03097	2.32293
0.01548	2.32418	0.02581	2.32418	0.02839	2.32418
0.01548	2.32543	0.02581	2.32543	0.02581	2.32543
0.02064	2.32668	0.02581	2.32668	0.02839	2.32668
0.02064	2.32793	0.02839	2.32793	0.02839	2.32793
0.02064	2.32918	0.02839	2.32918	0.02839	2.32918
0.01806	2.33043	0.02581	2.33043	0.02839	2.33043
0.01806	2.33168	0.02581	2.33168	0.02581	2.33168
0.01548	2.33293	0.02581	2.33293	0.02581	2.33293
0.0129	2.33418	0.02323	2.33418	0.02581	2.33418
0.0129	2.33543	0.02323	2.33543	0.02323	2.33543
0.0129	2.33668	0.02581	2.33668	0.02323	2.33668
0.00774	2.33793	0.02839	2.33793	0.02323	2.33793
0.00774	2.33918	0.02581	2.33918	0.02839	2.33918
0.00774	2.34043	0.02323	2.34043	0.02581	2.34043
0.00774	2.34168	0.02839	2.34168	0.02581	2.34168
0.00774	2.34293	0.02839	2.34293	0.02581	2.34293
0.00774	2.34418	0.02839	2.34418	0.02581	2.34418
0.00774	2.34543	0.02323	2.34543	0.02839	2.34543
0.00774	2.34668	0.02323	2.34668	0.03097	2.34668
0.00774	2.34793	0.02323	2.34793	0.02581	2.34793
0.00774	2.34918	0.02064	2.34918	0.02581	2.34918
0.00774	2.35043	0.01548	2.35043	0.02581	2.35043
0.01032	2.35168	0.01548	2.35168	0.02581	2.35168
0.01032	2.35293	0.02064	2.35293	0.02581	2.35293
0.00774	2.35418	0.02064	2.35418	0.02581	2.35418
0.00774	2.35543	0.02323	2.35543	0.02581	2.35543
0.00774	2.35668	0.02581	2.35668	0.02323	2.35668
0.00774	2.35793	0.02839	2.35793	0.02581	2.35793
0.00774	2.35918	0.03355	2.35918	0.02581	2.35918
0.00774	2.36043	0.03355	2.36043	0.02581	2.36043
0.00774	2.36168	0.03355	2.36168	0.02581	2.36168
0.00774	2.36293	0.03355	2.36293	0.02581	2.36293
0.00774	2.36418	0.03355	2.36418	0.02581	2.36418
0.00516	2.36543	0.03871	2.36543	0.02323	2.36543
0.00774	2.36668	0.03613	2.36668	0.02323	2.36668
0.00774	2.36793	0.03613	2.36793	0.02064	2.36793
0.01032	2.36918	0.03613	2.36918	0.02064	2.36918
0.01032	2.37043	0.03613	2.37043	0.02323	2.37043
0.01032	2.37168	0.03613	2.37168	0.02323	2.37168
0.01032	2.37293	0.03613	2.37293	0.02323	2.37293
0.01032	2.37418	0.03613	2.37418	0.02323	2.37418
0.01032	2.37543	0.03355	2.37543	0.02581	2.37543
0.0129	2.37668	0.03355	2.37668	0.02581	2.37668
0.0129	2.37793	0.03355	2.37793	0.02323	2.37793
0.0129	2.37918	0.03613	2.37918	0.02064	2.37918
0.0129	2.38043	0.03097	2.38043	0.02064	2.38043
0.0129	2.38168	0.03613	2.38168	0.02064	2.38168
0.0129	2.38293	0.03871	2.38293	0.02064	2.38293
0.0129	2.38418	0.03871	2.38418	0.02064	2.38418
0.0129	2.38543	0.03871	2.38543	0.01806	2.38543
0.0129	2.38668	0.03871	2.38668	0.01806	2.38668
0.0129	2.38793	0.03871	2.38793	0.02064	2.38793
0.0129	2.38918	0.04129	2.38918	0.02064	2.38918
0.01032	2.39043	0.04129	2.39043	0.02323	2.39043
0.01032	2.39168	0.03871	2.39168	0.02323	2.39168
0.01032	2.39293	0.03871	2.39293	0.02581	2.39293
0.01032	2.39418	0.03613	2.39418	0.02839	2.39418
0.0129	2.39543	0.03355	2.39543	0.03097	2.39543
0.0129	2.39668	0.03355	2.39668	0.02839	2.39668
0.0129	2.39793	0.02839	2.39793	0.03097	2.39793
0.01548	2.39918	0.02839	2.39918	0.03097	2.39918
0.01548	2.40043	0.02581	2.40043	0.03097	2.40043
0.01806	2.40168	0.02581	2.40168	0.03097	2.40168
0.01806	2.40293	0.02839	2.40293	0.03097	2.40293
0.01806	2.40418	0.02323	2.40418	0.03097	2.40418
0.01548	2.40543	0.02581	2.40543	0.03355	2.40543
0.01548	2.40668	0.02839	2.40668	0.03355	2.40668
0.0129	2.40793	0.03097	2.40793	0.03355	2.40793
0.01548	2.40918	0.03355	2.40918	0.03097	2.40918
0.01548	2.41043	0.03355	2.41043	0.03097	2.41043
0.01548	2.41168	0.03355	2.41168	0.03097	2.41168
0.01548	2.41293	0.03355	2.41293	0.03355	2.41293
0.01806	2.41418	0.03613	2.41418	0.03355	2.41418
0.01548	2.41543	0.03355	2.41543	0.03613	2.41543
0.01548	2.41668	0.03355	2.41668	0.03613	2.41668
0.01548	2.41793	0.03097	2.41793	0.03871	2.41793
0.01548	2.41918	0.03097	2.41918	0.03871	2.41918
0.01548	2.42043	0.02581	2.42043	0.04129	2.42043
0.01548	2.42168	0.02323	2.42168	0.04129	2.42168
0.01548	2.42293	0.02323	2.42293	0.04129	2.42293
0.01548	2.42418	0.02323	2.42418	0.04129	2.42418
0.01548	2.42543	0.02581	2.42543	0.04129	2.42543
0.01548	2.42668	0.02581	2.42668	0.03871	2.42668
0.01806	2.42793	0.02323	2.42793	0.04129	2.42793
0.01806	2.42918	0.02581	2.42918	0.03871	2.42918
0.01806	2.43043	0.02581	2.43043	0.03871	2.43043
0.02064	2.43168	0.02581	2.43168	0.03613	2.43168
0.02064	2.43293	0.02581	2.43293	0.03355	2.43293
0.01806	2.43418	0.02581	2.43418	0.03613	2.43418
0.01806	2.43543	0.02323	2.43543	0.03613	2.43543
0.02064	2.43668	0.02323	2.43668	0.03355	2.43668
0.01806	2.43793	0.02323	2.43793	0.03355	2.43793
0.02064	2.43918	0.02323	2.43918	0.03613	2.43918
0.01806	2.44043	0.02323	2.44043	0.03355	2.44043
0.01806	2.44168	0.02064	2.44168	0.03613	2.44168
0.01806	2.44293	0.02064	2.44293	0.03613	2.44293
0.02064	2.44418	0.02323	2.44418	0.03355	2.44418
0.02323	2.44543	0.02064	2.44543	0.03355	2.44543
0.02323	2.44668	0.01806	2.44668	0.03613	2.44668
0.02323	2.44793	0.01806	2.44793	0.03613	2.44793
0.02323	2.44918	0.01806	2.44918	0.04129	2.44918
0.02323	2.45043	0.01806	2.45043	0.04129	2.45043
0.02323	2.45168	0.02064	2.45168	0.03871	2.45168
0.02064	2.45293	0.02064	2.45293	0.03871	2.45293
0.02064	2.45418	0.02064	2.45418	0.03613	2.45418
0.02064	2.45543	0.02064	2.45543	0.03871	2.45543
0.02064	2.45668	0.02064	2.45668	0.03871	2.45668
0.02064	2.45793	0.02064	2.45793	0.03871	2.45793
0.02323	2.45918	0.02064	2.45918	0.03613	2.45918
0.02323	2.46043	0.02064	2.46043	0.03613	2.46043
0.02323	2.46168	0.02064	2.46168	0.03355	2.46168
0.02323	2.46293	0.02064	2.46293	0.03355	2.46293
0.02581	2.46418	0.01806	2.46418	0.03613	2.46418
0.02581	2.46543	0.01806	2.46543	0.03613	2.46543
0.02323	2.46668	0.01806	2.46668	0.03613	2.46668
0.02323	2.46793	0.01548	2.46793	0.03613	2.46793
0.02323	2.46918	0.01548	2.46918	0.03613	2.46918
0.02064	2.47043	0.01548	2.47043	0.03613	2.47043
0.02064	2.47168	0.01548	2.47168	0.03871	2.47168
0.02064	2.47293	0.01548	2.47293	0.03613	2.47293
0.02064	2.47418	0.02064	2.47418	0.03871	2.47418
0.01806	2.47543	0.02064	2.47543	0.03871	2.47543
0.01806	2.47668	0.02064	2.47668	0.04129	2.47668
0.01548	2.47793	0.02064	2.47793	0.04129	2.47793
0.01548	2.47918	0.02323	2.47918	0.04387	2.47918
0.02064	2.48043	0.02581	2.48043	0.04129	2.48043
0.01806	2.48168	0.02839	2.48168	0.04129	2.48168
0.01548	2.48293	0.02839	2.48293	0.04387	2.48293
0.01548	2.48418	0.03097	2.48418	0.04387	2.48418
0.01548	2.48543	0.03097	2.48543	0.04129	2.48543
0.0129	2.48668	0.03355	2.48668	0.04129	2.48668
0.0129	2.48793	0.03355	2.48793	0.03613	2.48793
0.0129	2.48918	0.03355	2.48918	0.03613	2.48918
0.01548	2.49043	0.03097	2.49043	0.03613	2.49043
0.01548	2.49168	0.02839	2.49168	0.03871	2.49168
0.01548	2.49293	0.03097	2.49293	0.04129	2.49293
0.01548	2.49418	0.03097	2.49418	0.03613	2.49418
0.01806	2.49543	0.03097	2.49543	0.03613	2.49543
0.01806	2.49668	0.03097	2.49668	0.03613	2.49668
0.01548	2.49793	0.03097	2.49793	0.04129	2.49793
[truncated: 2,004 more rows]

## Sheet: Snow Transport Rate
The data of the temporal evolution of snow transport rate for three wind force levels in Figure 1
	u*=0.3 m/s	u*=0.4 m/s	u*=0.5 m/s
Time (s)	Transport flux (10-3 kg m-2 s-1)	Transport flux (10-3 kg m-2 s-1)	Transport flux (10-3 kg m-2 s-1)
0.02	0	0	0
0.04	0.00127	0.02245	0.04405
0.06	0.00229	0.03863	0.11563
0.07999	0.00926	0.06462	0.21655
0.09999	0.01991	0.1032	0.34292
0.11999	0.03985	0.14889	0.49923
0.13999	0.06011	0.1987	0.69218
0.15998	0.08538	0.26191	0.91043
0.17998	0.11099	0.3468	1.19
0.19998	0.13361	0.44491	1.53
0.21998	0.14848	0.54975	1.92
0.23997	0.16291	0.6622	2.36
0.25999	0.18556	0.78701	2.87
0.28001	0.21826	0.93427	3.4
0.30004	0.2525	1.09	3.89
0.32007	0.29191	1.27	4.2
0.34009	0.32622	1.41	4.41
0.36012	0.36655	1.56	4.57
0.38015	0.40971	1.72	4.72
0.40018	0.45754	1.89	4.85
0.4202	0.50672	2.07	4.98
0.44023	0.55874	2.25	5.11
0.46026	0.61063	2.44	5.25
0.48028	0.66522	2.64	5.39
0.50031	0.72166	2.85	5.51
0.52034	0.78474	3.05	5.64
0.54037	0.85593	3.24	5.74
0.56039	0.93451	3.4	5.83
0.58042	1.02	3.53	5.92
0.60045	1.1	3.64	6
0.62047	1.19	3.74	6.07
0.6405	1.27	3.83	6.13
0.66053	1.36	3.91	6.18
0.68056	1.45	3.99	6.2
0.70058	1.55	4.06	6.22
0.72061	1.66	4.12	6.2
0.74064	1.77	4.18	6.17
0.76066	1.89	4.24	6.13
0.78069	2	4.29	6.05
0.80072	2.12	4.35	5.94
0.82075	2.22	4.39	5.8
0.84077	2.32	4.43	5.63
0.8608	2.39	4.45	5.43
0.88083	2.46	4.47	5.21
0.90085	2.51	4.48	5.01
0.92088	2.56	4.47	4.86
0.94091	2.6	4.45	4.75
0.96094	2.65	4.43	4.69
0.98096	2.7	4.38	4.67
1.00099	2.75	4.34	4.67
1.02102	2.79	4.28	4.67
1.04104	2.83	4.21	4.67
1.06107	2.85	4.14	4.66
1.0811	2.88	4.05	4.64
1.10113	2.89	3.95	4.62
1.12115	2.91	3.85	4.6
1.14118	2.91	3.74	4.6
1.16121	2.91	3.65	4.6
1.18123	2.91	3.59	4.61
1.20126	2.91	3.55	4.64
1.22129	2.89	3.53	4.67
1.24132	2.88	3.52	4.68
1.26134	2.87	3.53	4.69
1.28137	2.85	3.53	4.69
1.3014	2.83	3.54	4.68
1.32142	2.81	3.55	4.67
1.34145	2.78	3.54	4.65
1.36148	2.74	3.53	4.63
1.38151	2.69	3.51	4.62
1.40153	2.65	3.5	4.6
1.42156	2.59	3.49	4.61
1.44159	2.55	3.48	4.61
1.46161	2.51	3.48	4.62
1.48164	2.5	3.47	4.62
1.50167	2.49	3.47	4.62
1.5217	2.49	3.47	4.61
1.54172	2.5	3.48	4.6
1.56175	2.5	3.49	4.6
1.58178	2.49	3.49	4.59
1.6018	2.48	3.51	4.59
1.62183	2.46	3.51	4.6
1.64186	2.44	3.52	4.61
1.66189	2.43	3.52	4.62
1.68191	2.43	3.53	4.64
1.70194	2.43	3.55	4.65
1.72197	2.44	3.56	4.67
1.742	2.45	3.57	4.68
1.76202	2.46	3.58	4.68
1.78205	2.46	3.59	4.68
1.80208	2.45	3.58	4.67
1.8221	2.44	3.58	4.66
1.84213	2.44	3.58	4.65
1.86216	2.44	3.58	4.65
1.88219	2.45	3.57	4.64
1.90221	2.46	3.57	4.64
1.92224	2.47	3.56	4.63
1.94227	2.47	3.56	4.63
1.96229	2.47	3.57	4.63
1.98232	2.47	3.58	4.64
2.00235	2.47	3.6	4.65
2.02238	2.48	3.61	4.65
2.0424	2.49	3.61	4.65
2.06243	2.49	3.61	4.65
2.08246	2.5	3.61	4.64
2.10248	2.5	3.61	4.65
2.12251	2.49	3.61	4.67
2.14254	2.49	3.61	4.69
2.16257	2.5	3.61	4.69
2.18259	2.51	3.6	4.7
2.20262	2.52	3.58	4.7
2.22265	2.52	3.57	4.69
2.24267	2.53	3.55	4.7
2.2627	2.54	3.54	4.71
2.28273	2.54	3.53	4.71
2.30276	2.54	3.52	4.71
2.32278	2.54	3.51	4.71
2.34281	2.53	3.49	4.71
2.36284	2.52	3.48	4.71
2.38286	2.52	3.48	4.7
2.40289	2.52	3.48	4.69
2.42292	2.52	3.49	4.68
2.44295	2.52	3.5	4.66
2.46297	2.52	3.51	4.63
2.483	2.51	3.51	4.62
2.50303	2.49	3.51	4.61
2.52305	2.48	3.5	4.61
2.54308	2.46	3.49	4.62
2.56311	2.46	3.48	4.63
2.58314	2.46	3.47	4.64
2.60316	2.46	3.47	4.64
2.62319	2.46	3.48	4.63
2.64322	2.46	3.48	4.63
2.66324	2.46	3.49	4.64
2.68327	2.45	3.48	4.65
2.7033	2.44	3.48	4.67
2.72333	2.43	3.47	4.68
2.74335	2.43	3.47	4.68
2.76338	2.44	3.48	4.69
2.78341	2.44	3.48	4.71
2.80343	2.44	3.48	4.72
2.82346	2.43	3.49	4.74
2.84349	2.43	3.51	4.75
2.86352	2.42	3.53	4.75
2.88354	2.42	3.54	4.74
2.90357	2.42	3.55	4.74
2.9236	2.42	3.56	4.73
2.94362	2.42	3.56	4.72
2.96365	2.42	3.55	4.71
2.98368	2.42	3.55	4.7
3.00371	2.42	3.55	4.7
3.02373	2.42	3.55	4.71
3.04376	2.42	3.54	4.72
3.06379	2.43	3.54	4.72
3.08381	2.43	3.54	4.72
3.10384	2.44	3.54	4.72
3.12387	2.45	3.53	4.71
3.1439	2.47	3.53	4.7
3.16392	2.48	3.53	4.68
3.18395	2.49	3.53	4.67
3.20398	2.5	3.53	4.66
3.224	2.49	3.52	4.67
3.24403	2.48	3.5	4.68
3.26406	2.47	3.49	4.69
3.28409	2.46	3.48	4.68
3.30411	2.47	3.48	4.68
3.32414	2.48	3.48	4.67
3.34417	2.48	3.49	4.67
3.3642	2.49	3.48	4.66
3.38422	2.49	3.47	4.66
3.40425	2.48	3.47	4.65
3.42428	2.47	3.46	4.63
3.4443	2.47	3.45	4.62
3.46433	2.47	3.43	4.61
3.48436	2.48	3.42	4.61
3.50439	2.48	3.4	4.62
3.52441	2.48	3.39	4.64
3.54444	2.48	3.38	4.65
3.56447	2.48	3.39	4.67
3.58449	2.48	3.4	4.68
3.60452	2.48	3.41	4.69
3.62455	2.49	3.41	4.71
3.64458	2.49	3.41	4.72
3.6646	2.49	3.42	4.73
3.68463	2.5	3.43	4.74
3.70466	2.5	3.43	4.74
3.72468	2.5	3.43	4.75
3.74471	2.49	3.43	4.75
3.76474	2.47	3.42	4.75
3.78477	2.46	3.42	4.75
3.80479	2.45	3.42	4.75
3.82482	2.44	3.43	4.74
3.84485	2.44	3.44	4.74
3.86487	2.45	3.46	4.73
3.8849	2.45	3.48	4.72
3.90493	2.45	3.48	4.71
3.92496	2.45	3.48	4.7
3.94498	2.45	3.47	4.7
3.96501	2.45	3.46	4.7
3.98504	2.45	3.46	4.7
4.00506	2.45	3.46	4.69
4.02509	2.45	3.47	4.7
4.04512	2.45	3.48	4.69
4.06515	2.45	3.5	4.69
4.08517	2.44	3.51	4.7
4.1052	2.44	3.53	4.7
4.12523	2.43	3.54	4.69
4.14525	2.43	3.54	4.69
4.16528	2.44	3.54	4.68
4.18531	2.45	3.52	4.67
4.20534	2.45	3.51	4.67
4.22536	2.46	3.51	4.66
4.24539	2.46	3.51	4.65
4.26542	2.46	3.51	4.65
4.28544	2.44	3.51	4.65
4.30547	2.43	3.5	4.65
4.3255	2.42	3.5	4.65
4.34553	2.42	3.49	4.65
4.36555	2.42	3.49	4.65
4.38558	2.43	3.5	4.64
4.40561	2.43	3.51	4.64
4.42563	2.44	3.52	4.64
4.44566	2.43	3.52	4.64
4.46569	2.44	3.52	4.65
4.48572	2.44	3.52	4.65
4.50574	2.46	3.52	4.66
4.52577	2.47	3.53	4.67
4.5458	2.49	3.53	4.67
4.56582	2.5	3.54	4.66
4.58585	2.5	3.55	4.66
4.60588	2.5	3.56	4.65
4.62591	2.48	3.56	4.65
4.64593	2.47	3.56	4.66
4.66596	2.47	3.56	4.67
4.68599	2.49	3.56	4.69
4.70601	2.5	3.56	4.69
4.72604	2.52	3.55	4.7
4.74607	2.53	3.55	4.7
4.7661	2.54	3.55	4.7
4.78612	2.55	3.56	4.7
4.80615	2.54	3.57	4.71
4.82618	2.54	3.58	4.7
4.8462	2.54	3.58	4.7
4.86623	2.54	3.58	4.69
4.88626	2.55	3.57	4.68
4.90629	2.56	3.56	4.67
4.92631	2.56	3.54	4.68
4.94634	2.56	3.55	4.69
4.96637	2.56	3.54	4.71
4.98639	2.55	3.55	4.73
5.00642	2.54	3.55	4.74
5.02645	2.53	3.54	4.75
5.04648	2.52	3.54	4.76
5.0665	2.51	3.53	4.76
5.08653	2.51	3.52	4.75
5.10656	2.51	3.52	4.74
5.12659	2.51	3.52	4.74
5.14661	2.51	3.52	4.73
5.16664	2.52	3.52	4.74
5.18667	2.52	3.53	4.75
5.20669	2.51	3.53	4.77
5.22672	2.51	3.52	4.78
5.24675	2.51	3.51	4.79
5.26678	2.5	3.51	4.79
5.2868	2.49	3.5	4.78
5.30683	2.48	3.5	4.77
5.32686	2.46	3.51	4.75
5.34688	2.46	3.52	4.73
5.36691	2.45	3.53	4.71
5.38694	2.45	3.53	4.7
5.40697	2.46	3.53	4.69
5.42699	2.47	3.53	4.68
5.44702	2.47	3.53	4.69
5.46705	2.48	3.53	4.71
5.48707	2.49	3.52	4.73
5.5071	2.48	3.53	4.73
5.52713	2.48	3.53	4.72
5.54716	2.49	3.53	4.71
5.56718	2.5	3.53	4.69
5.58721	2.51	3.53	4.67
5.60724	2.52	3.53	4.66
5.62726	2.53	3.54	4.64
5.64729	2.53	3.56	4.63
5.66732	2.53	3.56	4.62
5.68735	2.53	3.57	4.61
5.70737	2.53	3.58	4.6
5.7274	2.52	3.58	4.6
5.74743	2.52	3.57	4.59
5.76745	2.5	3.57	4.59
5.78748	2.49	3.56	4.57
5.80751	2.48	3.54	4.56
5.82754	2.49	3.53	4.55
5.84756	2.5	3.53	4.54
5.86759	2.51	3.54	4.53
5.88762	2.53	3.54	4.51
5.90764	2.55	3.55	4.51
5.92767	2.56	3.55	4.5
5.9477	2.57	3.54	4.51
5.96773	2.56	3.52	4.53
5.98775	2.55	3.51	4.55
6.00778	2.54	3.5	4.57
6.02781	2.53	3.49	4.58
6.04783	2.51	3.49	4.6
6.06786	2.5	3.5	4.61
6.08789	2.49	3.51	4.61
6.10792	2.49	3.52	4.62
6.12794	2.49	3.52	4.62
6.14797	2.49	3.52	4.63
6.168	2.49	3.52	4.63
6.18802	2.48	3.52	4.63
6.20805	2.48	3.51	4.63
6.22808	2.47	3.51	4.64
6.24811	2.46	3.51	4.64
6.26813	2.46	3.51	4.64
6.28816	2.46	3.51	4.65
6.30819	2.46	3.51	4.66
6.32821	2.47	3.52	4.67
6.34824	2.48	3.52	4.68
6.36827	2.48	3.53	4.68
6.3883	2.5	3.53	4.69
6.40832	2.5	3.54	4.7
6.42835	2.51	3.56	4.7
6.44838	2.51	3.57	4.7
6.4684	2.51	3.56	4.71
6.48843	2.5	3.56	4.72
6.50846	2.5	3.55	4.73
6.52849	2.49	3.54	4.75
6.54851	2.48	3.54	4.77
6.56854	2.47	3.53	4.78
6.58857	2.46	3.53	4.79
6.60859	2.46	3.53	4.79
6.62862	2.46	3.53	4.79
6.64865	2.47	3.53	4.77
6.66868	2.48	3.54	4.75
6.6887	2.48	3.54	4.73
6.70873	2.49	3.53	4.7
6.72876	2.5	3.53	4.69
6.74879	2.51	3.53	4.68
6.76881	2.51	3.53	4.68
6.78884	2.52	3.55	4.69
6.80887	2.52	3.55	4.69
6.82889	2.52	3.55	4.68
6.84892	2.52	3.55	4.67
6.86895	2.53	3.54	4.66
6.88898	2.53	3.53	4.65
6.909	2.54	3.51	4.65
6.92903	2.55	3.5	4.65
6.94906	2.55	3.47	4.65
6.96908	2.56	3.46	4.66
6.98911	2.55	3.45	4.66
7.00914	2.55	3.45	4.67
7.02917	2.54	3.45	4.69
7.04919	2.53	3.46	4.71
7.06922	2.52	3.46	4.72
7.08925	2.52	3.46	4.72
7.10927	2.52	3.48	4.71
7.1293	2.51	3.5	4.69
7.14933	2.51	3.51	4.67
7.16936	2.52	3.51	4.65
7.18938	2.53	3.51	4.63
7.20941	2.54	3.5	4.6
7.22944	2.55	3.49	4.58
7.24946	2.55	3.49	4.58
7.26949	2.55	3.49	4.59
7.28952	2.55	3.49	4.61
7.30955	2.55	3.49	4.64
7.32957	2.55	3.49	4.66
7.3496	2.55	3.49	4.67
7.36963	2.54	3.5	4.67
7.38965	2.53	3.5	4.66
7.40968	2.52	3.49	4.65
7.42971	2.51	3.48	4.65
7.44974	2.5	3.48	4.66
7.46976	2.49	3.48	4.68
7.48979	2.5	3.47	4.7
7.50982	2.5	3.47	4.72
7.52984	2.5	3.47	4.72
7.54987	2.5	3.47	4.73
7.5699	2.49	3.47	4.73
7.58993	2.48	3.46	4.72
7.60995	2.48	3.45	4.71
7.62998	2.48	3.44	4.69
7.65001	2.48	3.44	4.66
7.67003	2.48	3.45	4.64
7.69006	2.49	3.45	4.61
7.71009	2.49	3.46	4.61
7.73012	2.5	3.46	4.61
7.75014	2.5	3.46	4.62
7.77017	2.51	3.47	4.62
7.7902	2.51	3.48	4.63
7.81022	2.51	3.51	4.64
7.83025	2.5	3.54	4.65
7.85028	2.5	3.56	4.66
7.87031	2.5	3.57	4.66
7.89033	2.5	3.57	4.66
7.91036	2.5	3.57	4.64
7.93039	2.5	3.56	4.61
7.95041	2.49	3.56	4.59
7.97044	2.49	3.55	4.57
7.99047	2.49	3.55	4.56
8.01	2.48	3.54	4.56
8.02907	2.48	3.54	4.57
8.04814	2.49	3.54	4.58
8.06722	2.49	3.55	4.59
8.08629	2.49	3.55	4.6
8.10536	2.49	3.56	4.6
8.12444	2.49	3.57	4.59
8.14351	2.5	3.56	4.59
8.16258	2.5	3.56	4.58
8.18166	2.51	3.56	4.58
8.20073	2.51	3.56	4.57
8.2198	2.51	3.56	4.57
8.23888	2.51	3.56	4.58
8.25795	2.51	3.56	4.59
8.27703	2.51	3.55	4.6
8.2961	2.51	3.53	4.62
8.31517	2.52	3.51	4.62
8.33425	2.53	3.5	4.62
8.35332	2.54	3.5	4.63
8.37239	2.54	3.5	4.64
8.39147	2.53	3.5	4.65
8.41054	2.53	3.49	4.65
8.42961	2.52	3.48	4.65
8.44869	2.51	3.47	4.64
8.46776	2.51	3.47	4.62
8.48683	2.51	3.46	4.6
8.50591	2.5	3.47	4.59
8.52498	2.5	3.48	4.6
8.54405	2.49	3.48	4.6
8.56313	2.49	3.49	4.62
8.5822	2.49	3.5	4.65
8.60127	2.49	3.51	4.66
8.62035	2.5	3.52	4.68
8.63942	2.5	3.52	4.67
8.65849	2.5	3.52	4.67
8.67757	2.5	3.51	4.66
8.69664	2.49	3.51	4.66
8.71572	2.47	3.51	4.65
8.73479	2.46	3.52	4.65
8.75386	2.45	3.53	4.65
8.77294	2.44	3.55	4.66
8.79201	2.44	3.56	4.66
8.81108	2.45	3.56	4.66
8.83016	2.45	3.56	4.66
8.84923	2.45	3.56	4.64
8.8683	2.46	3.56	4.62
8.88738	2.46	3.56	4.61
8.90645	2.46	3.55	4.6
8.92552	2.46	3.54	4.6
8.9446	2.46	3.53	4.6
8.96367	2.47	3.5	4.6
8.98274	2.47	3.49	4.6
9.00182	2.48	3.48	4.61
9.02089	2.48	3.48	4.62
9.03996	2.48	3.48	4.63
9.05904	2.48	3.48	4.65
9.07811	2.48	3.48	4.66
9.09719	2.49	3.48	4.67
9.11626	2.5	3.48	4.68
9.13533	2.51	3.48	4.68
9.15441	2.52	3.48	4.67
9.17348	2.52	3.48	4.66
9.19255	2.52	3.48	4.65
9.21163	2.52	3.47	4.63
9.2307	2.52	3.47	4.63
9.24977	2.52	3.47	4.64
9.26885	2.53	3.48	4.64
9.28792	2.54	3.49	4.65
9.30699	2.55	3.5	4.67
9.32607	2.55	3.5	4.68
9.34514	2.55	3.5	4.68
9.36421	2.55	3.49	4.68
9.38329	2.54	3.49	4.68
9.40236	2.54	3.49	4.67
9.42143	2.53	3.5	4.66
9.44051	2.52	3.51	4.66
9.45958	2.51	3.51	4.67
9.47865	2.49	3.51	4.68
9.49773	2.47	3.51	4.68
9.5168	2.46	3.52	4.68
9.53588	2.45	3.52	4.68
9.55495	2.44	3.52	4.69
9.57402	2.44	3.53	4.69
9.5931	2.45	3.53	4.69
9.61217	2.46	3.53	4.68
9.63124	2.47	3.53	4.67
9.65032	2.48	3.53	4.65
9.66939	2.49	3.53	4.64
9.68846	2.5	3.52	4.64
9.70754	2.5	3.52	4.64
9.72661	2.49	3.52	4.64
9.74568	2.5	3.52	4.65
9.76476	2.5	3.51	4.64
9.78383	2.51	3.51	4.63
9.8029	2.52	3.5	4.63
9.82198	2.53	3.49	4.62
9.84105	2.53	3.49	4.62
9.86012	2.53	3.49	4.63
9.8792	2.52	3.48	4.63
9.89827	2.52	3.47	4.63
9.91735	2.52	3.47	4.62
9.93642	2.53	3.48	4.63
9.95549	2.53	3.48	4.63
9.97457	2.54	3.49	4.64
9.99364	2.54	3.5	4.65
10.0127	2.54	3.5	4.67
10.0318	2.54	3.5	4.68
10.0509	2.53	3.5	4.68
10.0699	2.53	3.5	4.69
10.089	2.53	3.51	4.69
10.1081	2.53	3.52	4.69
10.1272	2.53	3.53	4.69
10.1462	2.53	3.53	4.68
10.1653	2.53	3.53	4.67
10.1844	2.53	3.53	4.65
10.2035	2.53	3.53	4.65
10.2225	2.52	3.53	4.64
10.2416	2.51	3.53	4.63
10.2607	2.5	3.52	4.62
10.2797	2.49	3.52	4.61
10.2988	2.47	3.52	4.59
10.3179	2.47	3.52	4.58
10.337	2.46	3.52	4.58
10.356	2.45	3.53	4.6
10.3751	2.45	3.53	4.63
10.3942	2.45	3.53	4.65
10.4133	2.44	3.53	4.66
10.4323	2.44	3.54	4.66
10.4514	2.45	3.54	4.64
10.4705	2.46	3.55	4.63
10.4895	2.47	3.56	4.62
10.5086	2.47	3.57	4.61
10.5277	2.48	3.56	4.61
10.5468	2.47	3.56	4.62
10.5658	2.47	3.55	4.63
10.5849	2.46	3.54	4.64
10.604	2.46	3.53	4.65
10.6231	2.47	3.53	4.65
10.6421	2.49	3.51	4.66
10.6612	2.49	3.5	4.66
10.6803	2.5	3.49	4.66
10.6994	2.5	3.49	4.67
10.7184	2.5	3.49	4.67
10.7375	2.5	3.49	4.67
10.7566	2.5	3.49	4.67
10.7757	2.51	3.48	4.68
10.7947	2.51	3.49	4.68
10.8138	2.51	3.49	4.68
10.8329	2.51	3.5	4.69
10.852	2.51	3.5	4.71
10.871	2.52	3.51	4.73
10.8901	2.52	3.51	4.74
10.9092	2.51	3.52	4.75
10.9282	2.5	3.53	4.74
10.9473	2.5	3.53	4.72
10.9664	2.5	3.54	4.71
10.9855	2.51	3.56	4.7
11.0045	2.52	3.57	4.69
11.0236	2.53	3.58	4.7
11.0427	2.52	3.58	4.71
11.0617	2.52	3.58	4.71
11.0808	2.5	3.57	4.72
11.0999	2.49	3.58	4.73
11.119	2.48	3.59	4.72
11.138	2.47	3.6	4.71
11.1571	2.47	3.61	4.7
11.1762	2.47	3.61	4.68
11.1953	2.46	3.61	4.67
11.2143	2.46	3.61	4.66
11.2334	2.46	3.61	4.66
11.2525	2.47	3.61	4.65
11.2716	2.48	3.62	4.65
11.2906	2.49	3.61	4.66
11.3097	2.49	3.61	4.67
11.3288	2.49	3.6	4.68
11.3479	2.48	3.59	4.69
11.3669	2.47	3.59	4.69
11.386	2.47	3.58	4.69
11.4051	2.46	3.58	4.7
11.4241	2.46	3.58	4.71
11.4432	2.45	3.57	4.72
11.4623	2.45	3.57	4.71
11.4814	2.46	3.56	4.7
11.5004	2.46	3.55	4.7
11.5195	2.46	3.53	4.7
11.5386	2.46	3.52	4.71
11.5577	2.46	3.51	4.72
11.5767	2.46	3.5	4.72
11.5958	2.45	3.5	4.71
11.6149	2.45	3.5	4.7
11.634	2.44	3.51	4.69
11.653	2.44	3.51	4.68
11.6721	2.44	3.51	4.67
11.6912	2.45	3.49	4.65
11.7103	2.45	3.48	4.64
11.7293	2.45	3.47	4.64
11.7484	2.45	3.47	4.64
11.7675	2.45	3.48	4.64
11.7866	2.46	3.49	4.65
11.8056	2.47	3.51	4.65
11.8247	2.47	3.52	4.65
11.8438	2.47	3.53	4.65
11.8628	2.47	3.54	4.64
11.8819	2.47	3.55	4.62
11.901	2.46	3.56	4.6
11.9201	2.46	3.57	4.59
11.9391	2.45	3.57	4.59
11.9582	2.45	3.57	4.59
11.9773	2.45	3.57	4.6
11.9964	2.45	3.57	4.6
12.0154	2.45	3.57	4.6
12.0345	2.45	3.57	4.6
12.0536	2.46	3.56	4.6
12.0726	2.46	3.56	4.6
12.0917	2.46	3.56	4.6
12.1108	2.47	3.57	4.6
12.1299	2.47	3.58	4.59
12.1489	2.47	3.58	4.57
12.168	2.47	3.58	4.56
12.1871	2.47	3.58	4.55
12.2062	2.47	3.57	4.55
12.2252	2.46	3.56	4.55
12.2443	2.46	3.54	4.56
12.2634	2.46	3.53	4.56
12.2825	2.46	3.53	4.56
12.3015	2.46	3.54	4.57
12.3206	2.47	3.54	4.58
12.3397	2.47	3.54	4.59
12.3588	2.49	3.54	4.6
12.3778	2.51	3.53	4.59
12.3969	2.53	3.53	4.58
12.416	2.54	3.54	4.58
12.4351	2.53	3.54	4.59
12.4541	2.53	3.54	4.59
12.4732	2.53	3.53	4.6
12.4923	2.53	3.51	4.6
12.5113	2.53	3.5	4.59
12.5304	2.54	3.5	4.58
12.5495	2.54	3.48	4.58
12.5686	2.55	3.47	4.57
12.5876	2.54	3.47	4.56
12.6067	2.54	3.47	4.55
12.6258	2.54	3.48	4.54
12.6448	2.54	3.48	4.54
12.6639	2.53	3.48	4.55
12.683	2.53	3.49	4.55
12.7021	2.52	3.49	4.57
12.7211	2.51	3.49	4.59
12.7402	2.5	3.5	4.6
12.7593	2.49	3.51	4.61
12.7784	2.49	3.51	4.62
12.7974	2.48	3.5	4.62
12.8165	2.47	3.5	4.62
12.8356	2.47	3.51	4.63
12.8547	2.46	3.51	4.63
12.8737	2.45	3.5	4.63
12.8928	2.45	3.5	4.63
12.9119	2.44	3.49	4.63
12.931	2.43	3.48	4.63
12.95	2.42	3.49	4.64
12.9691	2.4	3.49	4.66
12.9882	2.37	3.5	4.68
13.0073	2.36	3.5	4.68
13.0263	2.36	3.49	4.68
13.0454	2.36	3.48	4.68
13.0645	2.36	3.49	4.68
13.0835	2.36	3.5	4.67
13.1026	2.37	3.51	4.67
13.1217	2.37	3.53	4.68
13.1408	2.38	3.54	4.7
13.1598	2.4	3.54	4.71
13.1789	2.41	3.54	4.73
13.198	2.41	3.54	4.76
13.2171	2.41	3.53	4.78
13.2361	2.41	3.52	4.78
13.2552	2.42	3.52	4.78
13.2743	2.43	3.52	4.78
13.2934	2.44	3.52	4.77
13.3124	2.45	3.51	4.76
13.3315	2.47	3.51	4.75
13.3506	2.48	3.5	4.75
13.3697	2.5	3.51	4.75
13.3887	2.51	3.52	4.75
13.4078	2.52	3.54	4.75
13.4269	2.53	3.54	4.74
13.4459	2.54	3.54	4.74
13.465	2.54	3.54	4.74
13.4841	2.54	3.54	4.75
13.5032	2.55	3.54	4.74
13.5222	2.55	3.53	4.74
13.5413	2.56	3.52	4.74
13.5604	2.55	3.51	4.72
13.5794	2.55	3.5	4.72
13.5985	2.54	3.5	4.72
13.6176	2.54	3.51	4.72
13.6367	2.53	3.51	4.73
13.6557	2.52	3.51	4.75
13.6748	2.52	3.5	4.77
13.6939	2.52	3.5	4.79
13.713	2.52	3.49	4.79
13.732	2.52	3.5	4.77
13.7511	2.52	3.51	4.75
13.7702	2.52	3.52	4.73
13.7893	2.52	3.53	4.71
13.8083	2.53	3.54	4.7
13.8274	2.53	3.54	4.7
13.8465	2.53	3.54	4.7
13.8656	2.52	3.54	4.7
13.8846	2.5	3.53	4.7
13.9037	2.49	3.52	4.7
13.9228	2.47	3.52	4.7
13.9419	2.46	3.52	4.69
13.9609	2.46	3.52	4.69
13.98	2.46	3.51	4.69
13.9991	2.46	3.51	4.69
14.0181	2.46	3.5	4.69
14.0372	2.47	3.5	4.69
14.0563	2.48	3.5	4.69
14.0754	2.49	3.51	4.68
14.0944	2.5	3.52	4.67
14.1135	2.51	3.52	4.66
14.1326	2.53	3.53	4.65
14.1517	2.53	3.53	4.64
14.1707	2.54	3.54	4.63
14.1898	2.54	3.54	4.63
14.2089	2.54	3.54	4.63
14.2279	2.54	3.54	4.62
14.247	2.53	3.54	4.6
14.2661	2.53	3.54	4.59
14.2852	2.52	3.54	4.57
14.3042	2.52	3.55	4.56
14.3233	2.52	3.54	4.57
14.3424	2.52	3.53	4.58
14.3615	2.51	3.52	4.59
14.3805	2.51	3.51	4.61
14.3996	2.51	3.5	4.63
14.4187	2.51	3.5	4.64
14.4378	2.52	3.5	4.64
14.4568	2.53	3.5	4.64
14.4759	2.54	3.5	4.64
14.495	2.55	3.51	4.64
14.5141	2.55	3.51	4.64
14.5331	2.55	3.5	4.64
14.5522	2.54	3.5	4.65
14.5713	2.54	3.49	4.66
14.5904	2.53	3.49	4.66
14.6094	2.53	3.5	4.67
14.6285	2.54	3.5	4.67
14.6476	2.53	3.51	4.67
14.6666	2.52	3.5	4.67
14.6857	2.5	3.5	4.67
14.7048	2.48	3.5	4.67
14.7239	2.46	3.49	4.68
14.7429	2.45	3.49	4.68
14.762	2.45	3.49	4.69
14.7811	2.45	3.49	4.69
14.8002	2.45	3.5	4.69
14.8192	2.47	3.5	4.68
14.8383	2.48	3.51	4.69
14.8574	2.49	3.52	4.69
14.8765	2.49	3.53	4.68
14.8955	2.5	3.52	4.68
14.9146	2.5	3.52	4.67
14.9337	2.5	3.51	4.67
14.9527	2.5	3.52	4.66
14.9718	2.5	3.53	4.66
14.9909	2.49	3.53	4.65
15.01	2.49	3.54	4.65
15.029	2.49	3.54	4.64
15.0481	2.49	3.53	4.64
15.0672	2.49	3.52	4.64
15.0863	2.49	3.51	4.65
15.1053	2.5	3.5	4.66
15.1244	2.51	3.49	4.66
15.1435	2.51	3.48	4.65
15.1625	2.51	3.47	4.64
15.1816	2.51	3.47	4.62
15.2007	2.49	3.47	4.62
15.2198	2.48	3.49	4.62
15.2388	2.48	3.51	4.63
15.2579	2.49	3.53	4.63
15.277	2.5	3.54	4.63
15.2961	2.5	3.55	4.63
15.3151	2.51	3.56	4.64
15.3342	2.51	3.56	4.66
15.3533	2.51	3.57	4.66
15.3724	2.51	3.56	4.67
15.3914	2.52	3.56	4.67
15.4105	2.51	3.55	4.67
15.4296	2.51	3.55	4.68
15.4487	2.52	3.55	4.69
15.4677	2.51	3.55	4.7
15.4868	2.5	3.55	4.71
15.5059	2.5	3.56	4.72
15.525	2.5	3.56	4.73
15.544	2.5	3.55	4.73
15.5631	2.51	3.55	4.72
15.5822	2.52	3.55	4.7
15.6012	2.53	3.54	4.69
15.6203	2.54	3.54	4.69
15.6394	2.54	3.55	4.69
15.6585	2.54	3.57	4.69
15.6775	2.53	3.58	4.69
15.6966	2.53	3.59	4.68
15.7157	2.52	3.6	4.67
15.7348	2.52	3.61	4.67
15.7538	2.52	3.61	4.68
15.7729	2.52	3.61	4.69
15.792	2.52	3.6	4.7
15.811	2.53	3.58	4.7
15.8301	2.54	3.58	4.7
15.8492	2.55	3.58	4.69
15.8683	2.55	3.58	4.69
15.8873	2.55	3.58	4.68
15.9064	2.54	3.57	4.67
15.9255	2.54	3.56	4.67
15.9446	2.53	3.55	4.67
15.9636	2.52	3.55	4.67
15.9827	2.51	3.55	4.66
16.0018	2.5	3.55	4.65
16.0209	2.49	3.54	4.65
16.0399	2.48	3.53	4.65
16.059	2.48	3.53	4.65
16.0781	2.49	3.53	4.64
16.0971	2.49	3.55	4.65
16.1162	2.49	3.56	4.65
16.1353	2.48	3.56	4.64
16.1544	2.46	3.55	4.64
16.1734	2.44	3.54	4.64
16.1925	2.43	3.53	4.64
16.2116	2.42	3.53	4.62
16.2307	2.41	3.52	4.61
16.2497	2.41	3.52	4.59
16.2688	2.42	3.51	4.58
16.2879	2.43	3.51	4.58
16.307	2.44	3.5	4.58
16.326	2.46	3.5	4.58
16.3451	2.48	3.49	4.58
16.3642	2.49	3.49	4.58
16.3833	2.5	3.48	4.59
16.4023	2.5	3.48	4.6
16.4214	2.5	3.49	4.61
16.4405	2.5	3.49	4.62
16.4596	2.49	3.48	4.62
16.4786	2.49	3.48	4.61
16.4977	2.49	3.49	4.6
16.5168	2.5	3.49	4.6
16.5358	2.52	3.49	4.6
16.5549	2.52	3.5	4.6
16.574	2.52	3.5	4.61
16.5931	2.51	3.5	4.61
16.6121	2.5	3.5	4.6
16.6312	2.49	3.5	4.6
16.6503	2.48	3.49	4.61
16.6694	2.48	3.48	4.62
16.6884	2.48	3.47	4.62
16.7075	2.48	3.47	4.62
16.7266	2.48	3.47	4.62
16.7457	2.49	3.47	4.62
16.7647	2.49	3.47	4.62
16.7838	2.49	3.47	4.63
16.8029	2.49	3.47	4.65
16.822	2.49	3.48	4.67
16.841	2.49	3.49	4.69
16.8601	2.49	3.51	4.71
16.8792	2.48	3.52	4.73
16.8982	2.47	3.53	4.74
16.9173	2.47	3.54	4.76
16.9364	2.46	3.55	4.76
16.9555	2.45	3.56	4.75
16.9745	2.44	3.57	4.74
16.9936	2.43	3.57	4.73
17.0127	2.43	3.56	4.71
17.0318	2.42	3.54	4.7
17.0508	2.43	3.54	4.71
17.0699	2.43	3.54	4.72
17.089	2.44	3.54	4.73
17.108	2.44	3.54	4.73
17.1271	2.43	3.53	4.72
17.1462	2.43	3.52	4.7
17.1653	2.43	3.52	4.69
17.1843	2.44	3.53	4.68
17.2034	2.45	3.54	4.69
17.2225	2.46	3.56	4.68
17.2416	2.47	3.57	4.67
17.2606	2.47	3.57	4.66
17.2797	2.47	3.57	4.66
17.2988	2.46	3.56	4.66
17.3179	2.45	3.55	4.68
17.3369	2.45	3.55	4.68
17.356	2.45	3.55	4.68
17.3751	2.45	3.55	4.68
17.3941	2.45	3.54	4.68
17.4132	2.44	3.53	4.69
17.4323	2.44	3.52	4.69
17.4514	2.44	3.5	4.69
17.4704	2.45	3.49	4.68
17.4895	2.47	3.48	4.68
17.5086	2.47	3.49	4.67
17.5277	2.48	3.48	4.66
17.5467	2.49	3.48	4.67
17.5658	2.48	3.48	4.67
17.5849	2.48	3.48	4.68
17.604	2.48	3.48	4.68
17.623	2.49	3.49	4.68
17.6421	2.49	3.49	4.68
17.6612	2.49	3.5	4.68
17.6803	2.49	3.5	4.68
17.6993	2.49	3.5	4.68
17.7184	2.49	3.51	4.68
17.7375	2.49	3.52	4.69
17.7566	2.5	3.54	4.7
17.7756	2.5	3.53	4.71
17.7947	2.51	3.52	4.71
17.8138	2.51	3.51	4.71
17.8328	2.51	3.5	4.71
17.8519	2.5	3.5	4.71
17.871	2.49	3.51	4.71
17.8901	2.48	3.51	4.71
17.9091	2.48	3.52	4.72
17.9282	2.47	3.52	4.72
17.9473	2.47	3.52	4.72
17.9664	2.48	3.54	4.72
17.9854	2.48	3.56	4.72
18.0045	2.49	3.58	4.71
18.0236	2.5	3.6	4.71
18.0426	2.5	3.62	4.7
18.0617	2.5	3.64	4.7
18.0808	2.49	3.64	4.69
18.0999	2.47	3.64	4.69
18.1189	2.46	3.64	4.68
18.138	2.46	3.63	4.67
18.1571	2.47	3.64	4.66
18.1762	2.48	3.63	4.64
18.1952	2.48	3.63	4.65
18.2143	2.48	3.62	4.66
18.2334	2.48	3.6	4.67
18.2525	2.48	3.58	4.68
18.2715	2.47	3.58	4.68
18.2906	2.47	3.57	4.69
18.3097	2.48	3.56	4.69
18.3287	2.49	3.54	4.68
18.3478	2.49	3.52	4.67
18.3669	2.49	3.51	4.66
18.386	2.49	3.51	4.65
18.405	2.49	3.5	4.64
18.4241	2.49	3.49	4.64
18.4432	2.5	3.48	4.64
18.4623	2.51	3.47	4.64
18.4813	2.52	3.47	4.63
18.5004	2.53	3.47	4.61
18.5195	2.53	3.49	4.6
18.5386	2.54	3.5	4.61
18.5576	2.54	3.5	4.61
18.5767	2.54	3.5	4.61
18.5958	2.54	3.5	4.61
18.6149	2.53	3.49	4.61
18.6339	2.52	3.48	4.61
18.653	2.5	3.48	4.62
18.6721	2.49	3.49	4.63
18.6912	2.47	3.49	4.64
18.7102	2.47	3.5	4.64
18.7293	2.46	3.51	4.63
18.7484	2.47	3.51	4.63
18.7674	2.47	3.51	4.63
18.7865	2.48	3.51	4.63
18.8056	2.49	3.51	4.62
18.8247	2.49	3.52	4.61
18.8437	2.49	3.52	4.59
18.8628	2.49	3.52	4.58
18.8819	2.48	3.52	4.57
18.901	2.48	3.52	4.57
18.92	2.48	3.52	4.57
18.9391	2.48	3.52	4.58
18.9582	2.48	3.52	4.58
18.9773	2.49	3.52	4.59
18.9963	2.5	3.53	4.6
19.0154	2.5	3.54	4.6
19.0345	2.5	3.55	4.6
19.0536	2.49	3.56	4.59
19.0726	2.49	3.57	4.6
19.0917	2.49	3.57	4.61
19.1108	2.49	3.56	4.62
19.1298	2.49	3.56	4.63
19.1489	2.49	3.55	4.64
19.168	2.48	3.54	4.63
19.1871	2.48	3.53	4.63
19.2061	2.47	3.53	4.62
19.2252	2.48	3.52	4.61
19.2443	2.49	3.52	4.6
19.2633	2.5	3.51	4.59
19.2824	2.51	3.5	4.59
19.3015	2.51	3.49	4.59
19.3206	2.49	3.49	4.6
19.3396	2.48	3.49	4.61
19.3587	2.46	3.49	4.61
19.3778	2.45	3.49	4.61
19.3969	2.44	3.49	4.61
19.4159	2.44	3.49	4.61
19.435	2.45	3.49	4.62
19.4541	2.45	3.49	4.62
19.4732	2.45	3.49	4.62
19.4922	2.46	3.49	4.62
19.5113	2.47	3.49	4.62
19.5304	2.47	3.49	4.64
19.5495	2.47	3.5	4.65
19.5685	2.47	3.5	4.66
19.5876	2.46	3.49	4.67
19.6067	2.46	3.49	4.67
19.6258	2.47	3.48	4.68
19.6448	2.48	3.48	4.69
19.6639	2.48	3.48	4.69
19.683	2.48	3.48	4.68
19.702	2.48	3.48	4.67
19.7211	2.46	3.48	4.67
19.7402	2.46	3.48	4.67
19.7593	2.45	3.49	4.68
19.7783	2.45	3.49	4.67
19.7974	2.46	3.51	4.66
19.8165	2.47	3.53	4.66
19.8356	2.47	3.54	4.67
19.8546	2.48	3.54	4.68
19.8737	2.48	3.55	4.7
19.8928	2.48	3.55	4.7
19.9119	2.49	3.55	4.71
19.9309	2.5	3.56	4.71
19.95	2.5	3.58	4.72
19.9691	2.5	3.58	4.73
19.9882	2.5	3.59	4.73
20.0072	2.51	3.58	4.74
20.0263	2.51	3.57	4.73
20.0454	2.51	3.56	4.73
20.0644	2.5	3.56	4.74
20.0835	2.5	3.55	4.74
20.1026	2.48	3.55	4.75
20.1217	2.47	3.55	4.75
20.1407	2.46	3.55	4.74
20.1598	2.45	3.56	4.73
20.1789	2.45	3.57	4.72
20.1979	2.45	3.57	4.71
20.217	2.45	3.57	4.7
20.2361	2.45	3.57	4.69
20.2552	2.46	3.56	4.68
20.2742	2.47	3.56	4.68
20.2933	2.48	3.56	4.67
20.3124	2.5	3.56	4.67
20.3315	2.51	3.56	4.68
20.3505	2.51	3.56	4.68
20.3696	2.51	3.55	4.69
20.3887	2.51	3.54	4.71
20.4078	2.51	3.52	4.72
20.4268	2.52	3.51	4.72
20.4459	2.52	3.51	4.72
20.465	2.52	3.51	4.73
20.4841	2.53	3.52	4.73
20.5031	2.53	3.51	4.73
20.5222	2.53	3.5	4.72
20.5413	2.54	3.48	4.72
20.5603	2.53	3.47	4.7
20.5794	2.52	3.47	4.68
20.5985	2.51	3.49	4.67
20.6176	2.5	3.5	4.67
20.6366	2.5	3.5	4.67
20.6557	2.5	3.51	4.68
20.6748	2.49	3.52	4.69
20.6939	2.49	3.53	4.69
20.7129	2.49	3.54	4.69
20.732	2.49	3.55	4.68
20.7511	2.5	3.55	4.67
20.7702	2.51	3.55	4.66
20.7892	2.51	3.55	4.66
20.8083	2.51	3.55	4.67
20.8274	2.51	3.55	4.67
20.8465	2.49	3.56	4.68
20.8655	2.48	3.56	4.7
20.8846	2.46	3.56	4.71
20.9037	2.45	3.55	4.71
20.9228	2.45	3.54	4.7
20.9418	2.45	3.53	4.7
20.9609	2.45	3.52	4.7
20.98	2.46	3.51	4.69
20.999	2.47	3.5	4.69
21.0181	2.48	3.5	4.68
21.0372	2.48	3.5	4.66
21.0563	2.49	3.5	4.65
21.0753	2.49	3.51	4.64
21.0944	2.5	3.52	4.64
21.1135	2.5	3.54	4.64
21.1326	2.51	3.55	4.63
21.1516	2.52	3.56	4.63
21.1707	2.53	3.56	4.64
21.1898	2.54	3.57	4.64
21.2089	2.55	3.58	4.65
21.2279	2.55	3.58	4.64
21.247	2.55	3.59	4.63
21.2661	2.55	3.58	4.61
21.2851	2.55	3.57	4.6
21.3042	2.54	3.56	4.6
21.3233	2.54	3.54	4.61
21.3424	2.53	3.53	4.61
21.3614	2.53	3.52	4.63
21.3805	2.53	3.52	4.63
21.3996	2.54	3.52	4.64
21.4187	2.54	3.52	4.63
21.4377	2.54	3.52	4.62
21.4568	2.55	3.52	4.6
21.4759	2.55	3.52	4.59
21.4949	2.56	3.52	4.6
21.514	2.56	3.52	4.61
21.5331	2.56	3.52	4.62
21.5522	2.55	3.52	4.63
21.5712	2.54	3.52	4.62
21.5903	2.53	3.53	4.62
21.6094	2.52	3.53	4.62
21.6285	2.51	3.54	4.64
21.6475	2.5	3.55	4.65
21.6666	2.5	3.56	4.65
21.6857	2.51	3.57	4.65
21.7048	2.51	3.57	4.66
21.7238	2.51	3.58	4.67
21.7429	2.51	3.57	4.68
21.762	2.5	3.56	4.69
21.7811	2.49	3.54	4.7
21.8001	2.49	3.53	4.7
21.8192	2.49	3.53	4.7
21.8383	2.5	3.53	4.7
21.8574	2.51	3.53	4.69
21.8764	2.53	3.54	4.68
21.8955	2.55	3.55	4.67
21.9146	2.57	3.55	4.65
21.9336	2.58	3.56	4.65
21.9527	2.58	3.55	4.65
21.9718	2.57	3.54	4.65
21.9909	2.55	3.53	4.66
22.0099	2.54	3.53	4.67
22.029	2.52	3.52	4.68
22.0481	2.51	3.53	4.69
22.0672	2.5	3.54	4.68
22.0862	2.5	3.56	4.67
22.1053	2.49	3.58	4.65
22.1244	2.5	3.6	4.63
22.1435	2.51	3.61	4.62
22.1625	2.51	3.61	4.61
22.1816	2.51	3.61	4.61
22.2007	2.51	3.61	4.61
22.2197	2.51	3.6	4.61
22.2388	2.51	3.59	4.61
22.2579	2.51	3.58	4.61
22.277	2.51	3.57	4.62
22.296	2.5	3.56	4.61
22.3151	2.5	3.56	4.6
22.3342	2.49	3.57	4.6
22.3533	2.49	3.59	4.59
22.3723	2.5	3.6	4.59
22.3914	2.5	3.6	4.59
22.4105	2.51	3.6	4.6
22.4295	2.51	3.59	4.61
22.4486	2.5	3.58	4.62
22.4677	2.49	3.57	4.64
22.4868	2.48	3.57	4.65
22.5058	2.47	3.56	4.65
22.5249	2.46	3.56	4.65
22.544	2.46	3.56	4.64
22.5631	2.46	3.56	4.63
22.5821	2.47	3.56	4.61
22.6012	2.48	3.55	4.6
22.6203	2.49	3.54	4.6
22.6394	2.5	3.52	4.6
22.6584	2.51	3.5	4.61
22.6775	2.51	3.48	4.61
22.6966	2.51	3.47	4.62
22.7157	2.5	3.47	4.62
22.7347	2.49	3.46	4.63
22.7538	2.49	3.46	4.64
22.7729	2.48	3.46	4.64
22.7919	2.47	3.45	4.63
22.811	2.47	3.45	4.63
22.8301	2.46	3.45	4.62
22.8492	2.45	3.46	4.61
22.8682	2.44	3.46	4.61
22.8873	2.44	3.46	4.62
22.9064	2.45	3.46	4.63
22.9255	2.45	3.46	4.64
22.9445	2.45	3.45	4.63
22.9636	2.45	3.46	4.63
22.9827	2.45	3.46	4.62
23.0018	2.44	3.47	4.61
23.0208	2.43	3.48	4.61
23.0399	2.43	3.48	4.6
23.059	2.43	3.48	4.6
23.0781	2.43	3.47	4.59
23.0971	2.43	3.47	4.58
23.1162	2.43	3.47	4.56
23.1353	2.42	3.47	4.56
23.1543	2.42	3.47	4.56
23.1734	2.42	3.48	4.57
23.1925	2.41	3.48	4.56
23.2116	2.41	3.5	4.56
23.2306	2.42	3.51	4.56
23.2497	2.43	3.53	4.56
23.2688	2.45	3.54	4.56
23.2879	2.46	3.54	4.56
23.3069	2.47	3.55	4.56
23.326	2.47	3.54	4.57
23.3451	2.47	3.54	4.57
23.3641	2.47	3.55	4.58
23.3832	2.47	3.56	4.59
23.4023	2.48	3.55	4.6
23.4214	2.49	3.55	4.61
23.4404	2.49	3.55	4.62
23.4595	2.49	3.54	4.61
23.4786	2.48	3.54	4.61
23.4977	2.47	3.54	4.6
23.5167	2.47	3.53	4.59
23.5358	2.47	3.53	4.59
23.5549	2.47	3.52	4.59
23.574	2.47	3.52	4.59
23.593	2.47	3.53	4.58
23.6121	2.47	3.53	4.57
23.6312	2.46	3.53	4.57
23.6503	2.46	3.53	4.57
23.6693	2.47	3.53	4.59
23.6884	2.47	3.52	4.61
23.7075	2.47	3.52	4.63
23.7265	2.47	3.52	4.65
23.7456	2.47	3.53	4.67
23.7647	2.47	3.54	4.67
23.7838	2.47	3.54	4.69
23.8028	2.48	3.55	4.69
23.8219	2.48	3.54	4.7
23.841	2.48	3.52	4.7
23.8601	2.48	3.5	4.71
23.8791	2.47	3.49	4.72
23.8982	2.47	3.48	4.73
23.9173	2.47	3.49	4.74
23.9364	2.47	3.49	4.73
23.9554	2.47	3.5	4.73
23.9745	2.47	3.5	4.71
23.9936	2.47	3.51	4.69
24.0127	2.47	3.51	4.67
24.0317	2.46	3.5	4.67
24.0508	2.46	3.5	4.67
24.0699	2.46	3.5	4.68
24.089	2.46	3.5	4.68
24.108	2.45	3.5	4.69
24.1271	2.44	3.51	4.68
24.1462	2.44	3.52	4.67
24.1652	2.44	3.52	4.67
24.1843	2.44	3.52	4.67
24.2034	2.45	3.51	4.67
24.2225	2.45	3.51	4.67
24.2415	2.46	3.51	4.68
24.2606	2.47	3.51	4.68
24.2797	2.47	3.52	4.67
24.2987	2.48	3.52	4.67
24.3178	2.49	3.53	4.67
24.3369	2.49	3.54	4.67
24.356	2.49	3.54	4.67
24.3751	2.49	3.54	4.66
24.3941	2.49	3.53	4.66
24.4132	2.48	3.53	4.66
24.4323	2.48	3.52	4.66
24.4513	2.46	3.53	4.65
24.4704	2.46	3.54	4.64
24.4895	2.45	3.54	4.64
24.5086	2.45	3.54	4.63
24.5276	2.46	3.53	4.63
24.5467	2.47	3.52	4.63
24.5658	2.47	3.52	4.64
24.5849	2.47	3.52	4.65
24.6039	2.48	3.52	4.67
24.623	2.48	3.51	4.67
24.6421	2.48	3.51	4.67
24.6611	2.48	3.51	4.67
24.6802	2.49	3.51	4.67
24.6993	2.5	3.51	4.66
24.7184	2.5	3.51	4.66
24.7374	2.5	3.51	4.67
24.7565	2.51	3.51	4.68
24.7756	2.5	3.52	4.69
24.7947	2.5	3.52	4.7
24.8137	2.5	3.53	4.71
24.8328	2.5	3.54	4.7
24.8519	2.5	3.53	4.7
24.871	2.49	3.52	4.7
24.89	2.48	3.52	4.7
24.9091	2.47	3.5	4.7
24.9282	2.47	3.49	4.69
24.9473	2.47	3.5	4.69
24.9663	2.47	3.5	4.68
24.9854	2.47	3.51	4.68
25.0045	2.48	3.52	4.67
25.0236	2.48	3.53	4.67
25.0426	2.48	3.53	4.67
25.0617	2.47	3.53	4.67
25.0808	2.47	3.54	4.66
25.0998	2.47	3.55	4.66
25.1189	2.46	3.55	4.66
25.138	2.45	3.57	4.66
25.1571	2.45	3.58	4.67
25.1761	2.44	3.59	4.67
25.1952	2.44	3.6	4.66
25.2143	2.44	3.61	4.66
25.2334	2.44	3.61	4.66
25.2524	2.44	3.6	4.66
25.2715	2.44	3.6	4.66
25.2906	2.45	3.59	4.66
25.3097	2.46	3.58	4.67
25.3287	2.46	3.58	4.66
25.3478	2.46	3.58	4.65
25.3669	2.48	3.58	4.65
25.3859	2.48	3.57	4.65
25.405	2.49	3.57	4.65
25.4241	2.49	3.57	4.66
25.4432	2.5	3.59	4.66
25.4622	2.5	3.6	4.66
25.4813	2.5	3.61	4.66
25.5004	2.51	3.62	4.65
25.5195	2.51	3.62	4.65
25.5385	2.5	3.62	4.65
25.5576	2.49	3.62	4.64
25.5767	2.48	3.62	4.63
25.5957	2.47	3.62	4.63
25.6148	2.47	3.62	4.62
25.6339	2.47	3.61	4.61
25.653	2.48	3.61	4.6
25.672	2.49	3.6	4.59
25.6911	2.5	3.6	4.59
25.7102	2.51	3.59	4.6
25.7293	2.52	3.58	4.6
25.7483	2.53	3.57	4.6
25.7674	2.54	3.55	4.6
25.7865	2.55	3.54	4.6
25.8056	2.55	3.53	4.6
25.8246	2.55	3.54	4.6
25.8437	2.55	3.55	4.6
25.8628	2.55	3.55	4.61
25.8819	2.54	3.55	4.61
25.9009	2.54	3.54	4.62
25.92	2.54	3.54	4.63
25.9391	2.54	3.54	4.65
25.9581	2.53	3.54	4.65
25.9772	2.52	3.55	4.65
25.9963	2.52	3.55	4.65
26.0154	2.51	3.55	4.64
26.0344	2.5	3.54	4.63
26.0535	2.5	3.54	4.62
26.0726	2.51	3.54	4.62
26.0917	2.51	3.54	4.62
26.1107	2.52	3.53	4.62
26.1298	2.53	3.52	4.61
26.1489	2.53	3.52	4.62
26.168	2.54	3.52	4.63
26.187	2.54	3.52	4.65
26.2061	2.54	3.53	4.67
26.2252	2.53	3.54	4.69
26.2443	2.53	3.54	4.7
26.2633	2.53	3.53	4.7
26.2824	2.52	3.52	4.69
26.3015	2.51	3.5	4.68
26.3205	2.5	3.49	4.66
26.3396	2.48	3.49	4.65
26.3587	2.47	3.51	4.64
26.3778	2.47	3.51	4.65
26.3968	2.47	3.52	4.66
26.4159	2.47	3.51	4.66
26.435	2.48	3.52	4.66
26.4541	2.48	3.51	4.66
26.4731	2.49	3.51	4.65
26.4922	2.49	3.52	4.65
26.5113	2.49	3.51	4.64
26.5303	2.48	3.5	4.63
26.5494	2.48	3.49	4.63
26.5685	2.48	3.48	4.62
26.5876	2.47	3.48	4.61
26.6066	2.47	3.48	4.61
26.6257	2.48	3.48	4.62
26.6448	2.48	3.47	4.62
26.6639	2.48	3.47	4.63
26.6829	2.48	3.47	4.63
26.702	2.48	3.49	4.64
26.7211	2.48	3.51	4.64
26.7402	2.48	3.52	4.63
26.7592	2.47	3.53	4.61
26.7783	2.48	3.53	4.6
26.7974	2.48	3.52	4.59
26.8164	2.47	3.52	4.58
26.8355	2.46	3.52	4.58
26.8546	2.46	3.53	4.57
26.8737	2.45	3.53	4.57
26.8927	2.45	3.53	4.56
26.9118	2.46	3.52	4.55
26.9309	2.46	3.52	4.55
26.95	2.47	3.51	4.55
26.969	2.47	3.5	4.56
26.9881	2.47	3.5	4.57
27.0072	2.46	3.49	4.58
27.0263	2.45	3.49	4.59
27.0453	2.44	3.49	4.59
27.0644	2.44	3.48	4.58
27.0835	2.44	3.48	4.58
27.1026	2.44	3.47	4.58
27.1216	2.45	3.48	4.58
27.1407	2.45	3.48	4.58
27.1598	2.45	3.48	4.59
27.1789	2.46	3.49	4.61
27.1979	2.47	3.5	4.62
27.217	2.47	3.5	4.64
27.2361	2.47	3.52	4.65
27.2551	2.47	3.53	4.66
27.2742	2.47	3.53	4.65
27.2933	2.47	3.54	4.65
27.3124	2.47	3.53	4.65
27.3314	2.48	3.53	4.66
27.3505	2.49	3.52	4.66
27.3696	2.49	3.52	4.66
27.3887	2.49	3.51	4.66
27.4077	2.5	3.51	4.65
27.4268	2.5	3.51	4.65
27.4459	2.51	3.52	4.66
27.465	2.51	3.53	4.69
27.484	2.5	3.53	4.71
27.5031	2.5	3.53	4.72
27.5222	2.49	3.53	4.72
27.5413	2.48	3.53	4.7
27.5603	2.48	3.53	4.67
27.5794	2.47	3.53	4.65
27.5985	2.47	3.54	4.63
27.6175	2.47	3.55	4.62
27.6366	2.47	3.54	4.62
27.6557	2.46	3.54	4.63
27.6748	2.45	3.53	4.64
27.6938	2.45	3.53	4.65
27.7129	2.45	3.54	4.66
27.732	2.45	3.55	4.66
27.751	2.46	3.56	4.65
27.7701	2.46	3.57	4.65
27.7892	2.46	3.56	4.64
27.8083	2.46	3.55	4.62
27.8273	2.46	3.54	4.61
27.8464	2.46	3.53	4.6
27.8655	2.46	3.52	4.6
27.8846	2.47	3.52	4.61
27.9036	2.47	3.51	4.63
27.9227	2.47	3.51	4.64
27.9418	2.47	3.51	4.65
27.9609	2.47	3.5	4.66
27.9799	2.47	3.5	4.67
27.999	2.47	3.49	4.67
28.0181	2.48	3.49	4.66
28.0372	2.49	3.49	4.66
28.0562	2.5	3.5	4.64
28.0753	2.51	3.51	4.62
28.0944	2.52	3.53	4.6
28.1135	2.52	3.54	4.61
28.1325	2.52	3.53	4.63
28.1516	2.52	3.52	4.65
28.1707	2.53	3.51	4.67
28.1897	2.53	3.49	4.68
28.2088	2.53	3.49	4.68
28.2279	2.53	3.5	4.67
28.247	2.53	3.5	4.67
28.266	2.53	3.5	4.67
28.2851	2.52	3.51	4.67
28.3042	2.52	3.5	4.67
28.3233	2.51	3.5	4.67
28.3423	2.51	3.49	4.66
28.3614	2.51	3.49	4.66
28.3805	2.51	3.5	4.65
28.3996	2.51	3.5	4.64
28.4186	2.51	3.5	4.63
28.4377	2.5	3.5	4.64
28.4568	2.49	3.5	4.65
28.4759	2.48	3.51	4.67
28.4949	2.47	3.51	4.68
28.514	2.47	3.51	4.68
28.5331	2.47	3.51	4.68
28.5521	2.48	3.51	4.69
28.5712	2.49	3.52	4.69
28.5903	2.51	3.52	4.69
28.6094	2.52	3.53	4.7
28.6284	2.53	3.53	4.71
28.6475	2.53	3.51	4.71
28.6666	2.52	3.49	4.72
28.6857	2.52	3.47	4.73
28.7047	2.51	3.46	4.72
28.7238	2.52	3.46	4.71
28.7429	2.53	3.46	4.7
28.7619	2.54	3.46	4.69
28.781	2.55	3.46	4.69
28.8001	2.57	3.45	4.68
28.8192	2.57	3.45	4.68
28.8382	2.58	3.45	4.67
28.8573	2.57	3.46	4.66
28.8764	2.57	3.45	4.65
28.8955	2.57	3.45	4.66
28.9145	2.56	3.44	4.67
28.9336	2.55	3.43	4.69
28.9527	2.53	3.42	4.69
28.9718	2.52	3.43	4.69
28.9908	2.51	3.43	4.7
29.0099	2.5	3.43	4.72
29.029	2.5	3.43	4.71
29.048	2.5	3.43	4.71
29.0671	2.51	3.42	4.69
29.0862	2.51	3.41	4.67
29.1053	2.51	3.42	4.65
29.1243	2.51	3.43	4.65
29.1434	2.5	3.44	4.64
29.1625	2.49	3.43	4.65
29.1816	2.48	3.43	4.65
29.2006	2.47	3.42	4.64
29.2197	2.46	3.42	4.64
29.2388	2.46	3.42	4.65
29.2579	2.46	3.43	4.65
29.2769	2.46	3.44	4.66
29.296	2.47	3.45	4.66
29.3151	2.46	3.46	4.66
29.3342	2.46	3.46	4.66
29.3532	2.45	3.47	4.66
29.3723	2.44	3.48	4.66
29.3914	2.42	3.48	4.66
29.4105	2.42	3.48	4.67
29.4295	2.42	3.47	4.69
29.4486	2.43	3.46	4.7
29.4677	2.45	3.45	4.7
29.4867	2.46	3.44	4.69
29.5058	2.48	3.43	4.68
29.5249	2.49	3.43	4.66
29.544	2.5	3.43	4.65
29.563	2.5	3.44	4.64
29.5821	2.49	3.43	4.63
29.6012	2.49	3.44	4.62
29.6203	2.49	3.44	4.62
29.6393	2.49	3.45	4.62
29.6584	2.49	3.46	4.62
29.6775	2.49	3.47	4.63
29.6965	2.5	3.46	4.63
29.7156	2.5	3.46	4.63
29.7347	2.5	3.46	4.63
29.7538	2.49	3.47	4.63
29.7728	2.5	3.49	4.63
29.7919	2.5	3.51	4.62
29.811	2.5	3.52	4.62
29.8301	2.5	3.53	4.63
29.8491	2.51	3.52	4.63
29.8682	2.5	3.52	4.63
29.8873	2.5	3.53	4.63
29.9064	2.49	3.53	4.64
29.9254	2.49	3.54	4.64
29.9445	2.49	3.55	4.66
29.9636	2.49	3.55	4.66
29.9826	2.49	3.55	4.66
30.0017	2.49	3.55	4.66
30.0208	2.49	3.55	4.65
30.0399	2.49	3.54	4.64
30.0589	2.48	3.55	4.63
30.078	2.47	3.55	4.63
30.0971	2.47	3.55	4.64
30.1162	2.47	3.55	4.65
30.1352	2.47	3.54	4.66
30.1543	2.47	3.53	4.67
30.1734	2.48	3.52	4.67
30.1925	2.48	3.52	4.66
30.2115	2.47	3.53	4.66
30.2306	2.47	3.53	4.66
30.2497	2.47	3.53	4.66
30.2688	2.46	3.53	4.66
30.2878	2.46	3.53	4.66
30.3069	2.46	3.53	4.67
30.326	2.47	3.52	4.68
30.3451	2.47	3.52	4.7
30.3641	2.48	3.5	4.71
30.3832	2.48	3.49	4.72
30.4023	2.48	3.48	4.72
30.4213	2.48	3.48	4.72
30.4404	2.48	3.49	4.71
30.4595	2.49	3.49	4.71
30.4786	2.49	3.48	4.71
30.4976	2.49	3.47	4.71
30.5167	2.49	3.46	4.7
30.5358	2.48	3.45	4.69
30.5549	2.48	3.45	4.69
30.5739	2.48	3.46	4.69
30.593	2.49	3.47	4.69
30.6121	2.5	3.49	4.69
30.6312	2.51	3.5	4.69
30.6502	2.51	3.51	4.69
30.6693	2.51	3.52	4.68
30.6884	2.5	3.53	4.67
30.7075	2.49	3.54	4.67
30.7265	2.48	3.55	4.66
30.7456	2.47	3.56	4.66
30.7647	2.47	3.56	4.66
30.7837	2.47	3.54	4.66
30.8028	2.48	3.53	4.66
30.8219	2.49	3.52	4.66
30.841	2.5	3.51	4.66
30.86	2.51	3.51	4.66
30.8791	2.51	3.51	4.67
30.8982	2.51	3.51	4.67
30.9172	2.5	3.5	4.67
30.9363	2.49	3.49	4.64
30.9554	2.49	3.49	4.62
30.9745	2.49	3.48	4.61
30.9935	2.49	3.48	4.6
31.0126	2.5	3.48	4.61
31.0317	2.5	3.49	4.61
31.0508	2.5	3.49	4.61
31.0698	2.5	3.49	4.6
31.0889	2.49	3.49	4.6
31.108	2.48	3.5	4.59
31.1271	2.48	3.51	4.58
31.1461	2.47	3.52	4.58
31.1652	2.47	3.52	4.57
31.1843	2.47	3.51	4.56
31.2034	2.48	3.5	4.56
31.2224	2.48	3.5	4.56
31.2415	2.49	3.49	4.56
31.2606	2.5	3.48	4.56
31.2797	2.5	3.48	4.58
31.2987	2.5	3.49	4.61
31.3178	2.5	3.5	4.62
31.3369	2.49	3.53	4.65
31.3559	2.49	3.55	4.67
31.375	2.48	3.57	4.67
31.3941	2.47	3.59	4.67
31.4132	2.46	3.6	4.68
31.4322	2.45	3.6	4.68
31.4513	2.45	3.6	4.68
31.4704	2.45	3.59	4.67
31.4895	2.45	3.58	4.66
31.5085	2.45	3.58	4.65
31.5276	2.46	3.58	4.66
31.5467	2.46	3.57	4.67
31.5658	2.46	3.57	4.68
31.5848	2.46	3.56	4.68
31.6039	2.46	3.54	4.68
31.623	2.46	3.53	4.68
31.6421	2.47	3.52	4.68
31.6611	2.48	3.52	4.69
31.6802	2.5	3.53	4.69
31.6993	2.51	3.53	4.69
31.7183	2.53	3.54	4.69
31.7374	2.54	3.53	4.69
31.7565	2.55	3.53	4.7
31.7756	2.54	3.53	4.71
31.7946	2.53	3.53	4.71
31.8137	2.52	3.53	4.71
31.8328	2.51	3.54	4.71
31.8518	2.5	3.55	4.71
31.8709	2.5	3.57	4.7
31.89	2.51	3.57	4.67
31.9091	2.52	3.57	4.65
31.9281	2.53	3.56	4.63
31.9472	2.53	3.54	4.62
31.9663	2.53	3.53	4.62
31.9854	2.53	3.51	4.63
32.0053	2.52	3.5	4.64
32.0282	2.52	3.5	4.63
32.0511	2.52	3.5	4.63
32.074	2.52	3.5	4.62
32.0969	2.52	3.51	4.61
32.1198	2.52	3.52	4.61
32.1427	2.53	3.52	4.61
32.1656	2.53	3.53	4.6
32.1884	2.53	3.54	4.59
32.2113	2.52	3.55	4.6
32.2342	2.51	3.57	4.6
32.2571	2.5	3.58	4.61
32.28	2.49	3.58	4.61
32.3029	2.48	3.58	4.61
32.3258	2.47	3.57	4.6
32.3486	2.47	3.57	4.6
32.3715	2.47	3.56	4.6
32.3944	2.47	3.55	4.6
32.4173	2.48	3.54	4.6
32.4402	2.49	3.54	4.6
32.4631	2.5	3.52	4.6
32.486	2.51	3.52	4.6
32.5089	2.51	3.51	4.6
32.5318	2.51	3.5	4.59
32.5547	2.51	3.48	4.59
32.5775	2.51	3.47	4.6
32.6004	2.51	3.46	4.61
32.6233	2.51	3.45	4.63
32.6462	2.52	3.45	4.63
32.6691	2.52	3.45	4.63
32.692	2.52	3.46	4.63
32.7149	2.53	3.46	4.63
32.7377	2.52	3.46	4.64
32.7606	2.52	3.47	4.66
32.7835	2.52	3.46	4.67
32.8064	2.52	3.46	4.68
32.8293	2.51	3.45	4.69
32.8522	2.51	3.44	4.69
32.8751	2.5	3.43	4.7
32.898	2.51	3.42	4.7
32.9209	2.51	3.42	4.68
32.9437	2.52	3.41	4.66
32.9666	2.53	3.4	4.65
32.9895	2.54	3.4	4.63
33.0124	2.54	3.4	4.63
33.0353	2.54	3.4	4.63
33.0582	2.54	3.41	4.63
33.0811	2.54	3.41	4.63
33.104	2.53	3.41	4.62
33.1268	2.52	3.42	4.62
33.1497	2.51	3.42	4.63
33.1726	2.5	3.42	4.63
33.1955	2.49	3.42	4.64
33.2184	2.48	3.42	4.65
33.2413	2.49	3.43	4.67
33.2642	2.49	3.43	4.68
33.2871	2.5	3.44	4.7
33.31	2.51	3.44	4.7
33.3328	2.51	3.45	4.7
33.3557	2.52	3.45	4.71
33.3786	2.52	3.47	4.72
33.4015	2.51	3.48	4.72
33.4244	2.51	3.49	4.72
33.4473	2.51	3.49	4.71
33.4702	2.5	3.49	4.7
33.4931	2.49	3.48	4.69
33.5159	2.48	3.49	4.69
33.5388	2.47	3.49	4.68
33.5617	2.46	3.5	4.68
33.5846	2.45	3.5	4.67
33.6075	2.44	3.5	4.67
33.6304	2.43	3.49	4.67
33.6533	2.43	3.49	4.68
33.6762	2.42	3.49	4.69
33.699	2.43	3.49	4.69
33.7219	2.45	3.49	4.7
33.7448	2.46	3.49	4.7
33.7677	2.47	3.48	4.71
33.7906	2.47	3.47	4.71
33.8135	2.47	3.47	4.72
33.8364	2.46	3.46	4.73
33.8593	2.46	3.46	4.73
33.8822	2.47	3.46	4.73
33.9051	2.48	3.46	4.72
33.9279	2.49	3.46	4.71
33.9508	2.5	3.46	4.69
33.9737	2.51	3.47	4.68
33.9966	2.51	3.47	4.68
34.0195	2.51	3.48	4.68
34.0424	2.51	3.48	4.68
34.0653	2.52	3.49	4.68
34.0881	2.52	3.48	4.68
34.111	2.54	3.47	4.68
34.1339	2.55	3.46	4.68
34.1568	2.56	3.46	4.68
34.1797	2.57	3.46	4.67
34.2026	2.57	3.47	4.65
34.2255	2.58	3.48	4.64
34.2484	2.58	3.48	4.61
34.2713	2.58	3.49	4.6
34.2942	2.58	3.5	4.58
34.317	2.57	3.51	4.58
34.3399	2.56	3.53	4.59
34.3628	2.55	3.54	4.6
34.3857	2.54	3.54	4.61
34.4086	2.52	3.52	4.62
34.4315	2.51	3.51	4.62
34.4544	2.51	3.5	4.63
34.4772	2.51	3.49	4.63
34.5001	2.51	3.5	4.64
34.523	2.51	3.51	4.63
34.5459	2.52	3.52	4.63
34.5688	2.52	3.53	4.63
34.5917	2.51	3.54	4.64
34.6146	2.51	3.55	4.66
34.6375	2.51	3.54	4.69
34.6604	2.51	3.53	4.71
34.6833	2.51	3.52	4.71
34.7061	2.51	3.5	4.7
34.729	2.51	3.48	4.69
34.7519	2.51	3.47	4.66
34.7748	2.52	3.45	4.64
34.7977	2.52	3.45	4.62
34.8206	2.52	3.44	4.6
34.8435	2.51	3.44	4.58
34.8663	2.51	3.44	4.58
34.8892	2.5	3.44	4.58
34.9121	2.5	3.44	4.6
34.935	2.51	3.45	4.62
34.9579	2.52	3.46	4.64
34.9808	2.54	3.48	4.66
35.0037	2.55	3.49	4.67
35.0266	2.57	3.5	4.68
35.0495	2.59	3.51	4.69
35.0724	2.6	3.51	4.7
35.0952	2.6	3.51	4.71
35.1181	2.6	3.52	4.71
35.141	2.59	3.52	4.72
35.1639	2.57	3.53	4.73
35.1868	2.56	3.54	4.72
35.2097	2.54	3.55	4.72
35.2326	2.53	3.54	4.72
35.2555	2.53	3.54	4.73
35.2783	2.53	3.54	4.73
35.3012	2.54	3.54	4.73
35.3241	2.54	3.53	4.73
35.347	2.55	3.54	4.73
35.3699	2.55	3.53	4.72
35.3928	2.54	3.52	4.73
35.4157	2.54	3.51	4.74
35.4386	2.53	3.51	4.75
35.4614	2.52	3.52	4.76
35.4843	2.51	3.53	4.76
35.5072	2.51	3.55	4.77
35.5301	2.5	3.55	4.78
35.553	2.49	3.55	4.8
35.5759	2.49	3.54	4.8
35.5988	2.5	3.53	4.79
35.6217	2.5	3.54	4.78
35.6446	2.51	3.53	4.77
35.6674	2.5	3.53	4.77
35.6903	2.49	3.52	4.77
35.7132	2.48	3.51	4.77
35.7361	2.47	3.5	4.75
35.759	2.46	3.51	4.74
35.7819	2.46	3.52	4.73
35.8048	2.47	3.53	4.71
35.8277	2.47	3.54	4.7
35.8505	2.48	3.54	4.7
35.8734	2.48	3.54	4.69
35.8963	2.49	3.53	4.7
35.9192	2.5	3.52	4.72
35.9421	2.51	3.51	4.73
35.965	2.52	3.5	4.73
35.9879	2.52	3.5	4.73
36.0108	2.52	3.51	4.71
36.0337	2.51	3.52	4.68
36.0565	2.49	3.53	4.66
36.0794	2.49	3.54	4.64
36.1023	2.49	3.55	4.63
36.1252	2.5	3.56	4.63
36.1481	2.51	3.56	4.64
36.171	2.51	3.56	4.64
36.1939	2.51	3.54	4.64
36.2167	2.52	3.53	4.64
36.2396	2.52	3.52	4.62
36.2625	2.53	3.52	4.61
36.2854	2.53	3.52	4.61
36.3083	2.53	3.53	4.61
36.3312	2.52	3.53	4.62
36.3541	2.52	3.52	4.63
36.377	2.52	3.51	4.64
36.3999	2.52	3.5	4.65
36.4228	2.52	3.49	4.65
36.4456	2.52	3.48	4.67
36.4685	2.52	3.47	4.67
36.4914	2.52	3.45	4.67
36.5143	2.51	3.43	4.67
36.5372	2.5	3.42	4.67
36.5601	2.49	3.43	4.67
36.583	2.48	3.44	4.67
36.6058	2.48	3.45	4.66
36.6287	2.48	3.47	4.64
36.6516	2.48	3.48	4.62
36.6745	2.48	3.49	4.61
36.6974	2.47	3.49	4.6
36.7203	2.47	3.48	4.6
36.7432	2.47	3.47	4.6
36.7661	2.46	3.45	4.61
36.789	2.45	3.44	4.61
36.8118	2.44	3.45	4.61
36.8347	2.43	3.45	4.61
36.8576	2.43	3.46	4.61
36.8805	2.43	3.46	4.62
36.9034	2.43	3.46	4.62
36.9263	2.44	3.46	4.64
36.9492	2.44	3.46	4.64
36.9721	2.44	3.47	4.65
36.995	2.44	3.48	4.65
37.0178	2.44	3.49	4.64
37.0407	2.44	3.51	4.63
37.0636	2.45	3.52	4.64
37.0865	2.45	3.52	4.65
37.1094	2.45	3.53	4.67
37.1323	2.45	3.53	4.67
37.1552	2.45	3.53	4.67
37.1781	2.46	3.54	4.66
37.2009	2.46	3.55	4.66
37.2238	2.47	3.55	4.65
37.2467	2.48	3.55	4.65
37.2696	2.49	3.54	4.65
37.2925	2.49	3.52	4.65
37.3154	2.5	3.5	4.65
37.3383	2.5	3.49	4.65
37.3612	2.5	3.49	4.65
37.3841	2.49	3.49	4.65
37.4069	2.49	3.5	4.65
37.4298	2.5	3.52	4.65
37.4527	2.5	3.53	4.66
37.4756	2.51	3.55	4.67
37.4985	2.52	3.56	4.68
37.5214	2.53	3.56	4.68
37.5443	2.52	3.55	4.67
37.5672	2.52	3.55	4.65
37.59	2.5	3.55	4.64
37.6129	2.49	3.56	4.63
37.6358	2.48	3.56	4.62
37.6587	2.48	3.56	4.62
37.6816	2.48	3.56	4.62
37.7045	2.48	3.55	4.64
37.7274	2.48	3.54	4.67
37.7503	2.49	3.53	4.69
37.7732	2.49	3.53	4.69
37.796	2.5	3.53	4.68
37.8189	2.51	3.52	4.66
37.8418	2.51	3.53	4.65
37.8647	2.51	3.54	4.65
37.8876	2.51	3.54	4.65
37.9105	2.5	3.54	4.66
37.9334	2.49	3.54	4.67
37.9563	2.48	3.54	4.68
37.9791	2.48	3.54	4.7
38.002	2.47	3.54	4.71
38.0249	2.46	3.53	4.72
38.0478	2.46	3.53	4.73
38.0707	2.46	3.52	4.72
38.0936	2.47	3.5	4.73
38.1165	2.47	3.49	4.74
38.1394	2.46	3.47	4.75
38.1623	2.46	3.46	4.75
38.1851	2.45	3.45	4.75
38.208	2.45	3.44	4.73
38.2309	2.44	3.44	4.72
38.2538	2.45	3.44	4.71
38.2767	2.46	3.45	4.7
38.2996	2.47	3.46	4.7
38.3225	2.49	3.46	4.69
38.3454	2.5	3.47	4.68
38.3682	2.51	3.47	4.67
38.3911	2.51	3.48	4.67
38.414	2.51	3.47	4.67
38.4369	2.51	3.47	4.66
38.4598	2.51	3.47	4.65
38.4827	2.51	3.47	4.65
38.5056	2.5	3.47	4.66
38.5285	2.48	3.48	4.67
38.5513	2.47	3.48	4.69
38.5742	2.46	3.48	4.7
38.5971	2.46	3.49	4.7
38.62	2.47	3.5	4.69
38.6429	2.48	3.5	4.67
38.6658	2.49	3.51	4.64
38.6887	2.5	3.51	4.62
38.7116	2.51	3.51	4.6
38.7345	2.52	3.52	4.59
38.7573	2.52	3.53	4.6
38.7802	2.52	3.54	4.61
38.8031	2.51	3.55	4.62
38.826	2.5	3.55	4.62
38.8489	2.49	3.56	4.61
38.8718	2.49	3.56	4.61
38.8947	2.5	3.55	4.61
38.9176	2.51	3.56	4.63
38.9404	2.51	3.56	4.65
38.9633	2.51	3.56	4.67
38.9862	2.5	3.55	4.68
39.0091	2.49	3.55	4.69
39.032	2.48	3.54	4.7
39.0549	2.48	3.54	4.71
39.0778	2.49	3.54	4.71
39.1007	2.49	3.53	4.71
39.1236	2.49	3.53	4.71
39.1464	2.49	3.52	4.7
39.1693	2.49	3.52	4.69
39.1922	2.49	3.52	4.67
39.2151	2.5	3.53	4.64
39.238	2.51	3.53	4.62
39.2609	2.52	3.53	4.61
39.2838	2.52	3.52	4.61
39.3067	2.51	3.51	4.61
39.3295	2.5	3.5	4.63
39.3524	2.5	3.49	4.65
39.3753	2.49	3.49	4.66
39.3982	2.49	3.49	4.67
39.4211	2.49	3.49	4.69
39.444	2.48	3.5	4.69
39.4669	2.48	3.5	4.69
39.4898	2.48	3.49	4.69
39.5127	2.49	3.48	4.69
39.5355	2.5	3.48	4.69
39.5584	2.51	3.48	4.7
39.5813	2.52	3.48	4.7
39.6042	2.52	3.48	4.71
39.6271	2.51	3.48	4.7
39.65	2.51	3.48	4.7
39.6729	2.51	3.49	4.69
39.6958	2.51	3.5	4.68
39.7186	2.51	3.5	4.67
39.7415	2.52	3.51	4.67
39.7644	2.52	3.5	4.67
[truncated: 884 more rows]
