# Supplementary material for: The impacts of moisture transport on drifting snow sublimation in the saltation layer
Source: Copernicus journal article supplement (doi:10.5194/acp-16-7523-2016), 2016-06-20
Supplement: Supplementary file 2 [file Data in Figure 2.xlsx]

## Sheet: Temperarure and Humidity
	u*=0.3 m/s, Without moisture transport		u*=0.4 m/s, Without moisture transport		u*=0.5 m/s, Without moisture transport		u*=0.3 m/s, diffusion		u*=0.4 m/s, diffusion		u*=0.5 m/s, diffusion		u*=0.3 m/s, diffusion and advection		u*=0.4 m/s, diffusion and advection		u*=0.5 m/s, diffusion and advection
Time (s)	Temperature (K)	Relative humidity (%)	Temperature (K)	Relative humidity (%)	Temperature (K)	Relative humidity (%)	Temperature (K)	Relative humidity (%)	Temperature (K)	Relative humidity (%)	Temperature (K)	Relative humidity (%)	Temperature (K)	Relative humidity (%)	Temperature (K)	Relative humidity (%)	Temperature (K)	Relative humidity (%)
0.02	263.15	77.0701	263.15	77.0701	263.15	77.0701	263.15	77.0917	263.15	77.08	263.15	77.0541	263.15	77.0792	263.15	77.0418	263.129	77.591
0.0399994	263.15	77.0701	263.15	77.0701	263.15	77.0701	263.15	77.0314	263.15	76.9127	263.15	76.7652	263.15	76.9116	263.15	76.7102	263.129	77.376
0.0599968	263.15	77.0701	263.15	77.0701	263.15	77.0701	263.15	76.8495	263.15	76.6044	263.15	76.3456	263.15	76.6019	263.15	76.252	263.129	77.061
0.0799941	263.15	77.0706	263.15	77.0717	263.15	77.0722	263.15	76.6076	263.15	76.2589	263.149	75.9191	263.15	76.251	263.149	75.7924	263.129	76.758
0.0999915	263.15	77.0717	263.15	77.0743	263.149	77.092	263.15	76.3442	263.149	75.9146	263.148	75.5251	263.15	75.8999	263.149	75.3616	263.129	76.425
0.119989	263.15	77.0722	263.15	77.0777	263.149	77.1104	263.149	76.0798	263.149	75.5874	263.147	75.1674	263.149	75.5641	263.149	74.9664	263.128	76.095
0.139986	263.15	77.0763	263.149	77.0861	263.148	77.1365	263.149	75.8226	263.148	75.2788	263.145	74.8422	263.149	75.2478	263.148	74.605	263.128	75.779
0.159984	263.15	77.0787	263.149	77.099	263.147	77.1653	263.149	75.5753	263.147	74.9943	263.144	74.549	263.149	74.9514	263.148	74.276	263.127	75.483
0.179981	263.149	77.0834	263.149	77.1087	263.145	77.1971	263.149	75.3411	263.147	74.7309	263.142	74.2882	263.149	74.6744	263.147	73.9756	263.127	75.204
0.199978	263.149	77.0892	263.148	77.1286	263.144	77.2495	263.148	75.1167	263.146	74.4901	263.14	74.0566	263.149	74.4158	263.147	73.7036	263.126	74.943
0.219976	263.149	77.0957	263.147	77.1577	263.142	77.3059	263.148	74.9053	263.145	74.2644	263.137	73.8518	263.148	74.1718	263.146	73.4504	263.125	74.699
0.239973	263.148	77.1141	263.146	77.1901	263.139	77.3833	263.147	74.7064	263.144	74.059	263.134	73.6792	263.148	73.9439	263.145	73.221	263.124	74.47
0.259985	263.147	77.1414	263.144	77.2287	263.136	77.4591	263.147	74.5185	263.142	73.8726	263.131	73.534	263.148	73.7279	263.144	73.0076	263.124	74.255
0.280012	263.147	77.1537	263.143	77.269	263.133	77.5679	263.146	74.3426	263.141	73.6969	263.127	73.4189	263.147	73.5295	263.143	72.8128	263.123	74.053
0.30004	263.146	77.169	263.141	77.3155	263.128	77.6996	263.146	74.1735	263.139	73.536	263.123	73.3303	263.147	73.3415	263.142	72.6359	263.122	73.863
0.320067	263.146	77.1816	263.139	77.3937	263.123	77.8476	263.145	74.0121	263.138	73.3869	263.118	73.2649	263.147	73.1618	263.141	72.4716	263.12	73.683
0.340094	263.145	77.199	263.137	77.4509	263.118	77.9998	263.144	73.8617	263.136	73.256	263.112	73.226	263.146	72.9925	263.14	72.3287	263.119	73.513
0.360121	263.145	77.2172	263.134	77.5207	263.112	78.1696	263.143	73.722	263.134	73.141	263.106	73.2099	263.146	72.8317	263.138	72.1988	263.118	73.353
0.380148	263.144	77.2359	263.132	77.5901	263.106	78.3525	263.142	73.5918	263.132	73.0307	263.099	73.2295	263.145	72.6788	263.137	72.0816	263.116	73.202
0.400175	263.144	77.2485	263.13	77.6497	263.097	78.5934	263.141	73.47	263.129	72.9371	263.092	73.2655	263.145	72.5387	263.135	71.98	263.115	73.06
0.420202	263.143	77.2757	263.127	77.728	263.088	78.8669	263.14	73.3536	263.126	72.8573	263.084	73.3294	263.144	72.4083	263.133	71.8927	263.113	72.926
0.44023	263.142	77.2998	263.124	77.8323	263.077	79.1995	263.139	73.248	263.123	72.791	263.075	73.4386	263.143	72.2822	263.132	71.8136	263.111	72.8
0.460257	263.14	77.3553	263.12	77.9407	263.064	79.5684	263.138	73.146	263.12	72.7351	263.064	73.5881	263.143	72.1623	263.13	71.7413	263.109	72.682
0.480284	263.139	77.3969	263.115	78.0764	263.051	79.9464	263.137	73.0459	263.117	72.6893	263.052	73.7898	263.142	72.0508	263.128	71.6851	263.107	72.569
0.500311	263.137	77.4341	263.111	78.1993	263.035	80.4193	263.135	72.962	263.113	72.6687	263.039	74.0193	263.141	71.9459	263.125	71.6469	263.105	72.464
0.520338	263.136	77.4832	263.107	78.3273	263.02	80.8671	263.134	72.8845	263.109	72.656	263.026	74.2843	263.141	71.8462	263.123	71.6178	263.102	72.368
0.540366	263.134	77.5331	263.102	78.4646	263.004	81.3339	263.132	72.8118	263.104	72.6529	263.012	74.5547	263.14	71.7574	263.12	71.5969	263.099	72.279
0.560393	263.132	77.5804	263.097	78.6158	262.986	81.8635	263.13	72.7462	263.1	72.6633	262.998	74.8152	263.139	71.6796	263.117	71.6053	263.096	72.196
0.58042	263.13	77.641	263.091	78.7896	262.97	82.3571	263.128	72.6911	263.094	72.6962	262.984	75.1042	263.137	71.6054	263.114	71.6239	263.093	72.122
0.600447	263.128	77.709	263.084	78.9773	262.95	82.9273	263.126	72.6344	263.088	72.7488	262.968	75.4393	263.136	71.5335	263.11	71.6658	263.089	72.056
0.620474	263.125	77.7771	263.077	79.1921	262.932	83.4793	263.124	72.5908	263.083	72.8059	262.953	75.7548	263.135	71.4767	263.106	71.7224	263.085	71.997
0.640501	263.123	77.8522	263.069	79.4171	262.915	83.9955	263.121	72.5619	263.076	72.8836	262.94	76.0433	263.134	71.4239	263.102	71.7907	263.081	71.946
0.660528	263.12	77.9419	263.062	79.6392	262.901	84.4197	263.118	72.5374	263.069	72.9741	262.93	76.2228	263.132	71.3839	263.097	71.8657	263.076	71.902
0.680556	263.117	78.0146	263.052	79.9259	262.889	84.7713	263.116	72.5124	263.061	73.0908	262.921	76.3574	263.13	71.352	263.093	71.9589	263.072	71.866
0.700583	263.114	78.1027	263.043	80.1963	262.877	85.1219	263.113	72.508	263.053	73.2207	262.913	76.4868	263.129	71.3155	263.087	72.083	263.066	71.837
0.72061	263.111	78.1866	263.033	80.4661	262.867	85.4376	263.109	72.5168	263.044	73.3756	262.905	76.6261	263.127	71.2926	263.082	72.2168	263.061	71.815
0.740637	263.108	78.2792	263.023	80.7699	262.855	85.7951	263.105	72.5295	263.035	73.5482	262.896	76.7871	263.125	71.2804	263.076	72.374	263.055	71.802
0.760664	263.104	78.3973	263.011	81.121	262.844	86.1253	263.101	72.5551	263.025	73.7398	262.887	76.9538	263.123	71.2772	263.069	72.5425	263.048	71.799
0.780691	263.099	78.5411	263	81.457	262.834	86.4418	263.097	72.579	263.015	73.944	262.878	77.1142	263.12	71.2859	263.062	72.7515	263.041	71.805
0.800718	263.095	78.6744	262.986	81.8621	262.823	86.7667	263.093	72.6067	263.004	74.1628	262.872	77.2221	263.118	71.301	263.055	72.9372	263.034	71.818
0.820746	263.09	78.8129	262.972	82.2736	262.812	87.0864	263.089	72.6493	262.994	74.3715	262.865	77.3109	263.115	71.3219	263.047	73.1303	263.025	71.838
0.840773	263.085	78.9599	262.958	82.688	262.803	87.3879	263.084	72.7135	262.983	74.6086	262.858	77.428	263.113	71.3421	263.038	73.3522	263.015	71.867
0.8608	263.079	79.1286	262.946	83.0671	262.793	87.6655	263.078	72.7817	262.971	74.8505	262.854	77.477	263.11	71.3811	263.027	73.5902	263.006	71.904
0.880827	263.073	79.3179	262.931	83.4984	262.783	87.9711	263.073	72.8636	262.961	75.0743	262.846	77.6118	263.107	71.4273	263.014	73.8408	262.996	71.951
0.900854	263.066	79.5091	262.918	83.8858	262.773	88.2772	263.067	72.9523	262.952	75.2552	262.839	77.7373	263.103	71.4878	263.005	73.9982	262.988	72.008
0.920882	263.06	79.6976	262.907	84.2159	262.763	88.5851	263.061	73.0489	262.944	75.4093	262.832	77.8528	263.1	71.5564	263	74.1091	262.981	72.075
0.940909	263.052	79.9106	262.897	84.5227	262.755	88.8425	263.055	73.1501	262.937	75.5342	262.826	77.9521	263.096	71.6292	262.996	74.2078	262.976	72.155
0.960936	263.045	80.1376	262.888	84.8025	262.747	89.0952	263.048	73.2729	262.929	75.6789	262.823	77.9817	263.093	71.7163	262.993	74.3013	262.971	72.243
0.980963	263.037	80.3747	262.879	85.0692	262.738	89.3771	263.04	73.4227	262.921	75.8428	262.819	78.0013	263.088	71.8253	262.988	74.4444	262.967	72.341
1.00099	263.028	80.6383	262.871	85.3156	262.729	89.6296	263.032	73.5732	262.913	76.0118	262.814	78.0726	263.084	71.9288	262.983	74.5564	262.963	72.452
1.02102	263.019	80.897	262.862	85.5886	262.721	89.8954	263.025	73.7186	262.905	76.1702	262.81	78.1333	263.079	72.0479	262.979	74.6679	262.96	72.575
1.04104	263.01	81.153	262.853	85.8607	262.713	90.1257	263.016	73.8985	262.896	76.3554	262.805	78.1906	263.074	72.1822	262.977	74.7368	262.957	72.705
1.06107	263.001	81.4318	262.844	86.1378	262.707	90.3268	263.008	74.0818	262.888	76.5043	262.802	78.2305	263.068	72.3295	262.976	74.8169	262.955	72.846
1.0811	262.992	81.6872	262.835	86.3907	262.7	90.5384	262.999	74.2476	262.882	76.6263	262.798	78.2673	263.063	72.4749	262.975	74.9043	262.952	72.995
1.10113	262.981	82.008	262.826	86.6597	262.693	90.773	262.991	74.4355	262.875	76.7754	262.794	78.3144	263.057	72.6362	262.97	75.0081	262.95	73.154
1.12115	262.971	82.3043	262.818	86.9246	262.684	91.0265	262.982	74.6328	262.867	76.9169	262.791	78.3488	263.051	72.7939	262.967	75.057	262.949	73.323
1.14118	262.962	82.5896	262.807	87.2408	262.677	91.2699	262.973	74.8324	262.862	77.0121	262.786	78.4208	263.043	72.9763	262.967	75.1018	262.947	73.497
1.16121	262.95	82.9334	262.798	87.5143	262.669	91.493	262.964	75.0141	262.857	77.1016	262.782	78.4603	263.035	73.1743	262.968	75.1175	262.946	73.663
1.18124	262.94	83.239	262.79	87.7721	262.663	91.6876	262.957	75.1557	262.852	77.1845	262.779	78.5074	263.026	73.345	262.966	75.1507	262.945	73.811
1.20126	262.931	83.5131	262.781	88.0362	262.657	91.8846	262.951	75.2753	262.847	77.2596	262.777	78.505	263.02	73.4657	262.964	75.2059	262.944	73.936
1.22129	262.923	83.7599	262.773	88.2908	262.651	92.0588	262.946	75.3592	262.843	77.3074	262.774	78.5274	263.018	73.533	262.963	75.2447	262.943	74.044
1.24132	262.915	83.976	262.765	88.5329	262.645	92.2543	262.94	75.472	262.838	77.3911	262.77	78.5705	263.016	73.6019	262.961	75.2632	262.942	74.148
1.26134	262.909	84.1677	262.758	88.7518	262.639	92.4392	262.933	75.6104	262.833	77.486	262.767	78.5909	263.013	73.7143	262.961	75.2787	262.942	74.257
1.28137	262.902	84.3784	262.75	89.0084	262.633	92.637	262.926	75.7759	262.828	77.566	262.765	78.6053	263.009	73.8647	262.963	75.2883	262.941	74.374
1.3014	262.896	84.5686	262.743	89.2155	262.627	92.8241	262.918	75.9321	262.825	77.6113	262.761	78.6547	263.004	74.0092	262.963	75.3213	262.941	74.497
1.32143	262.887	84.8218	262.736	89.4222	262.621	93.0117	262.912	76.0521	262.822	77.6523	262.759	78.6563	263.001	74.1182	262.961	75.391	262.941	74.615
1.34145	262.879	85.0783	262.73	89.6231	262.616	93.1704	262.907	76.1567	262.818	77.7016	262.756	78.6928	262.998	74.2196	262.961	75.4355	262.94	74.717
1.36148	262.872	85.2934	262.723	89.843	262.611	93.313	262.902	76.2586	262.815	77.7419	262.753	78.7162	262.995	74.3026	262.96	75.4645	262.939	74.802
1.38151	262.864	85.5259	262.717	90.0194	262.606	93.4697	262.896	76.3554	262.81	77.8143	262.751	78.7322	262.992	74.3767	262.958	75.4697	262.939	74.872
1.40153	262.856	85.7695	262.711	90.2066	262.601	93.6412	262.892	76.4322	262.807	77.8699	262.748	78.7572	262.99	74.4312	262.958	75.4502	262.938	74.93
1.42156	262.849	85.9757	262.704	90.4129	262.595	93.8227	262.887	76.5157	262.804	77.9058	262.745	78.7839	262.989	74.468	262.959	75.4484	262.939	74.98
1.44159	262.842	86.1786	262.698	90.6144	262.59	93.9767	262.882	76.6081	262.801	77.9304	262.741	78.8498	262.988	74.5115	262.96	75.4374	262.939	75.026
1.46162	262.836	86.3777	262.692	90.8065	262.585	94.1335	262.877	76.7037	262.799	77.9291	262.738	78.9011	262.988	74.5526	262.961	75.4324	262.94	75.072
1.48164	262.83	86.5546	262.686	90.9711	262.581	94.2771	262.873	76.7873	262.797	77.9336	262.735	78.9462	262.987	74.6051	262.962	75.4553	262.94	75.119
1.50167	262.824	86.7284	262.681	91.1337	262.576	94.4146	262.869	76.8518	262.794	77.9714	262.732	78.9817	262.985	74.6647	262.961	75.4853	262.94	75.164
1.5217	262.818	86.9263	262.675	91.3076	262.571	94.5824	262.864	76.9366	262.792	77.9935	262.731	78.9473	262.984	74.6992	262.959	75.5104	262.939	75.206
1.54172	262.811	87.123	262.67	91.4879	262.566	94.7323	262.86	77.0078	262.788	78.0567	262.73	78.921	262.984	74.7366	262.958	75.5009	262.939	75.243
1.56175	262.806	87.2916	262.664	91.6759	262.561	94.8944	262.857	77.0629	262.785	78.1051	262.73	78.8886	262.983	74.766	262.96	75.5242	262.939	75.275
1.58178	262.8	87.4779	262.657	91.8749	262.556	95.0467	262.854	77.098	262.78	78.1871	262.728	78.8837	262.984	74.7887	262.962	75.5226	262.939	75.311
1.6018	262.793	87.6702	262.652	92.0329	262.552	95.173	262.851	77.1274	262.777	78.251	262.726	78.9095	262.983	74.8257	262.959	75.5756	262.938	75.347
1.62183	262.787	87.8528	262.647	92.1988	262.549	95.2885	262.848	77.1777	262.773	78.3047	262.723	78.9482	262.982	74.877	262.958	75.5815	262.937	75.385
1.64186	262.781	88.0466	262.642	92.3534	262.545	95.3949	262.844	77.2443	262.771	78.3315	262.72	78.9887	262.981	74.9166	262.956	75.5938	262.937	75.426
1.66189	262.775	88.24	262.636	92.538	262.542	95.5047	262.84	77.3122	262.769	78.3301	262.716	79.0549	262.98	74.9596	262.956	75.5787	262.937	75.467
1.68191	262.768	88.4338	262.63	92.7117	262.538	95.6199	262.837	77.3607	262.767	78.3598	262.716	79.0297	262.978	74.9895	262.957	75.5555	262.938	75.497
1.70194	262.763	88.6104	262.626	92.857	262.535	95.7269	262.834	77.404	262.765	78.3548	262.713	79.0525	262.977	75.0312	262.96	75.5248	262.939	75.521
1.72197	262.758	88.7638	262.621	93.0176	262.531	95.8424	262.831	77.4556	262.762	78.4034	262.712	79.0541	262.977	75.0278	262.962	75.5292	262.939	75.538
1.74199	262.753	88.9185	262.616	93.1675	262.528	95.936	262.828	77.4988	262.76	78.4383	262.71	79.0724	262.977	75.0384	262.961	75.5957	262.939	75.552
1.76202	262.748	89.0601	262.611	93.3107	262.525	96.0376	262.825	77.532	262.757	78.4642	262.707	79.121	262.978	75.0427	262.958	75.6254	262.939	75.562
1.78205	262.742	89.2289	262.607	93.4363	262.522	96.1401	262.824	77.5462	262.755	78.4768	262.704	79.1487	262.978	75.0579	262.957	75.6373	262.938	75.574
1.80208	262.737	89.3985	262.603	93.5672	262.519	96.2409	262.822	77.5613	262.753	78.5161	262.703	79.1479	262.978	75.0835	262.959	75.6247	262.939	75.588
1.8221	262.731	89.5735	262.599	93.6893	262.516	96.3416	262.819	77.5975	262.75	78.5385	262.702	79.1316	262.978	75.0884	262.96	75.6076	262.939	75.602
1.84213	262.727	89.7194	262.596	93.7946	262.513	96.4311	262.816	77.6307	262.748	78.5597	262.701	79.1133	262.979	75.1059	262.961	75.6251	262.938	75.619
1.86216	262.722	89.864	262.592	93.9129	262.51	96.513	262.813	77.6937	262.747	78.5632	262.701	79.0948	262.979	75.1149	262.959	75.6647	262.938	75.633
1.88218	262.717	90.0134	262.588	94.0525	262.508	96.5935	262.81	77.7313	262.745	78.5828	262.7	79.081	262.977	75.1444	262.956	75.6991	262.937	75.648
1.90221	262.712	90.1625	262.584	94.1701	262.505	96.678	262.808	77.7643	262.742	78.6363	262.697	79.1114	262.977	75.1541	262.956	75.7189	262.937	75.661
1.92224	262.708	90.3088	262.58	94.2899	262.503	96.7656	262.805	77.7953	262.739	78.689	262.694	79.1689	262.977	75.1613	262.957	75.6782	262.937	75.672
1.94227	262.703	90.4449	262.577	94.3934	262.5	96.8544	262.803	77.8212	262.736	78.7335	262.69	79.2622	262.977	75.171	262.959	75.6801	262.937	75.678
1.96229	262.698	90.5993	262.574	94.5018	262.497	96.9411	262.801	77.8512	262.735	78.7265	262.687	79.2914	262.977	75.1704	262.959	75.6836	262.937	75.683
1.98232	262.693	90.747	262.57	94.6185	262.495	97.0109	262.799	77.8749	262.733	78.731	262.686	79.3053	262.978	75.1717	262.957	75.6852	262.937	75.691
2.00235	262.689	90.8825	262.566	94.739	262.493	97.0817	262.796	77.9233	262.732	78.7162	262.685	79.2953	262.978	75.1803	262.957	75.7182	262.937	75.703
2.02237	262.684	91.0323	262.563	94.8509	262.49	97.1541	262.794	77.9478	262.731	78.711	262.684	79.2872	262.979	75.2003	262.958	75.7161	262.937	75.722
2.0424	262.679	91.2077	262.559	94.9643	262.488	97.2376	262.792	77.9577	262.73	78.7112	262.683	79.29	262.979	75.2347	262.96	75.7184	262.937	75.744
2.06243	262.674	91.3647	262.556	95.075	262.485	97.3136	262.791	77.9574	262.727	78.7585	262.68	79.3187	262.977	75.2609	262.958	75.7648	262.936	75.765
2.08246	262.669	91.5044	262.552	95.1834	262.483	97.3853	262.789	77.9747	262.725	78.7983	262.679	79.3241	262.975	75.286	262.955	75.7947	262.936	75.782
2.10248	262.665	91.6395	262.549	95.2896	262.481	97.4486	262.787	78.0027	262.723	78.8222	262.678	79.3213	262.975	75.2852	262.953	75.788	262.935	75.789
2.12251	262.661	91.7498	262.546	95.3849	262.479	97.5095	262.784	78.0452	262.721	78.8344	262.676	79.3425	262.975	75.2823	262.955	75.7753	262.935	75.789
2.14254	262.657	91.8721	262.543	95.4623	262.478	97.5637	262.783	78.0602	262.719	78.8442	262.674	79.3551	262.976	75.2695	262.958	75.733	262.936	75.787
2.16256	262.653	91.9976	262.54	95.5597	262.476	97.6206	262.781	78.0781	262.718	78.8464	262.672	79.4051	262.978	75.2618	262.959	75.7483	262.936	75.79
2.18259	262.649	92.1189	262.538	95.6436	262.474	97.6847	262.779	78.0937	262.717	78.8536	262.668	79.4703	262.978	75.2756	262.958	75.7933	262.936	75.805
2.20262	262.646	92.2335	262.535	95.7293	262.472	97.7511	262.778	78.0926	262.715	78.8701	262.667	79.4845	262.978	75.3031	262.954	75.8553	262.935	75.823
2.22265	262.641	92.372	262.532	95.8188	262.47	97.8029	262.776	78.1007	262.712	78.9185	262.665	79.5085	262.976	75.3543	262.953	75.8528	262.934	75.841
2.24267	262.637	92.4927	262.529	95.9155	262.469	97.8561	262.775	78.1016	262.711	78.936	262.664	79.5176	262.975	75.3603	262.954	75.8391	262.934	75.854
2.2627	262.633	92.622	262.526	96.004	262.467	97.9027	262.773	78.1267	262.709	78.9506	262.663	79.4909	262.974	75.3514	262.956	75.7931	262.935	75.857
2.28273	262.629	92.7427	262.523	96.1056	262.466	97.953	262.771	78.154	262.708	78.9593	262.662	79.4978	262.975	75.3395	262.957	75.7918	262.935	75.851
2.30276	262.626	92.8376	262.521	96.1839	262.464	98.006	262.769	78.1953	262.706	78.9831	262.661	79.5001	262.977	75.3206	262.956	75.8089	262.935	75.849
2.32278	262.623	92.9538	262.518	96.2613	262.462	98.0645	262.767	78.2169	262.705	78.9848	262.659	79.5293	262.979	75.3224	262.955	75.8245	262.935	75.854
2.34281	262.619	93.062	262.516	96.3356	262.461	98.1203	262.765	78.2439	262.703	78.9883	262.659	79.5064	262.978	75.3499	262.955	75.8096	262.935	75.866
2.36284	262.615	93.1879	262.513	96.4147	262.459	98.1677	262.763	78.2627	262.702	78.9973	262.658	79.4854	262.976	75.3791	262.956	75.7841	262.936	75.881
2.38286	262.612	93.3045	262.511	96.4763	262.458	98.2131	262.761	78.2979	262.701	79.0056	262.657	79.4926	262.975	75.3999	262.958	75.7787	262.937	75.893
2.40289	262.608	93.4182	262.51	96.5352	262.456	98.2618	262.759	78.3121	262.699	79.0104	262.656	79.5079	262.974	75.3942	262.96	75.7836	262.937	75.896
2.42292	262.605	93.5144	262.508	96.6019	262.455	98.3038	262.758	78.3265	262.698	79.031	262.654	79.5299	262.976	75.3837	262.958	75.8043	262.938	75.892
2.44295	262.602	93.6171	262.506	96.6632	262.454	98.3451	262.756	78.3454	262.696	79.0494	262.65	79.6074	262.977	75.3645	262.957	75.8252	262.937	75.888
2.46297	262.599	93.7024	262.504	96.7212	262.452	98.3971	262.755	78.3505	262.695	79.0614	262.648	79.6614	262.978	75.3562	262.958	75.8094	262.937	75.892
2.483	262.596	93.7949	262.502	96.7811	262.45	98.4462	262.753	78.363	262.694	79.0588	262.646	79.6689	262.978	75.3821	262.957	75.7962	262.937	75.901
2.50303	262.593	93.8843	262.5	96.8499	262.449	98.4933	262.752	78.3787	262.693	79.0386	262.646	79.6445	262.977	75.4163	262.958	75.7848	262.937	75.915
2.52305	262.591	93.9688	262.498	96.9165	262.448	98.5344	262.751	78.3722	262.692	79.0532	262.645	79.6606	262.977	75.4272	262.959	75.7562	262.938	75.933
2.54308	262.588	94.0614	262.496	96.9854	262.446	98.5728	262.75	78.3841	262.691	79.0571	262.645	79.6234	262.976	75.4349	262.959	75.7526	262.939	75.943
2.56311	262.585	94.1486	262.493	97.059	262.445	98.6051	262.749	78.3804	262.689	79.0975	262.645	79.6051	262.975	75.4445	262.96	75.7412	262.939	75.943
2.58314	262.582	94.2384	262.491	97.1218	262.444	98.6377	262.747	78.4044	262.686	79.136	262.644	79.5947	262.975	75.4327	262.961	75.7619	262.939	75.941
2.60316	262.58	94.3128	262.49	97.1804	262.444	98.6681	262.746	78.3981	262.683	79.2016	262.643	79.6118	262.976	75.418	262.959	75.7675	262.939	75.937
2.62319	262.578	94.3769	262.488	97.239	262.443	98.6997	262.745	78.412	262.681	79.2308	262.642	79.6153	262.976	75.4138	262.959	75.7707	262.939	75.933
2.64322	262.575	94.4623	262.486	97.2874	262.442	98.7284	262.743	78.4325	262.68	79.2445	262.64	79.6353	262.977	75.4189	262.959	75.7543	262.939	75.934
2.66324	262.573	94.5376	262.484	97.3469	262.441	98.7616	262.741	78.4636	262.679	79.2357	262.638	79.6808	262.977	75.4199	262.96	75.7478	262.939	75.942
2.68327	262.57	94.6252	262.483	97.4045	262.44	98.7957	262.739	78.4918	262.679	79.2062	262.637	79.6951	262.978	75.4395	262.961	75.7165	262.939	75.956
2.7033	262.567	94.7223	262.481	97.4707	262.439	98.8274	262.737	78.5287	262.679	79.1973	262.636	79.6891	262.977	75.4599	262.961	75.728	262.939	75.969
2.72333	262.564	94.8205	262.479	97.5291	262.438	98.8551	262.735	78.567	262.678	79.1864	262.635	79.6834	262.976	75.4805	262.959	75.7427	262.939	75.984
2.74335	262.561	94.9047	262.477	97.5827	262.437	98.8813	262.733	78.6024	262.677	79.1864	262.634	79.7076	262.975	75.4873	262.959	75.7488	262.94	75.992
2.76338	262.558	94.99	262.476	97.6308	262.436	98.9075	262.731	78.6262	262.675	79.2387	262.632	79.7196	262.974	75.494	262.96	75.715	262.94	75.991
2.78341	262.556	95.0652	262.474	97.6821	262.435	98.9346	262.73	78.6217	262.673	79.262	262.631	79.7268	262.974	75.4779	262.962	75.7307	262.94	75.983
2.80343	262.554	95.1342	262.472	97.7357	262.435	98.9572	262.73	78.606	262.671	79.3068	262.63	79.7292	262.975	75.4557	262.962	75.7576	262.939	75.974
2.82346	262.552	95.1936	262.471	97.7835	262.434	98.9834	262.73	78.5873	262.669	79.3361	262.63	79.7317	262.977	75.4417	262.959	75.8145	262.938	75.965
2.84349	262.55	95.2563	262.47	97.8262	262.433	99.0078	262.729	78.5793	262.668	79.3473	262.628	79.7517	262.978	75.4417	262.956	75.8276	262.937	75.961
2.86352	262.548	95.3316	262.468	97.8703	262.432	99.0314	262.728	78.5952	262.666	79.3718	262.627	79.771	262.978	75.4465	262.955	75.8162	262.937	75.964
2.88354	262.545	95.4178	262.467	97.9184	262.431	99.0574	262.726	78.6227	262.665	79.3745	262.625	79.7879	262.978	75.4583	262.958	75.7782	262.937	75.969
2.90357	262.542	95.4922	262.466	97.9577	262.431	99.078	262.724	78.6467	262.665	79.3636	262.625	79.7839	262.978	75.4716	262.961	75.7613	262.938	75.978
2.9236	262.54	95.5587	262.464	98.0009	262.43	99.1005	262.722	78.678	262.664	79.3545	262.623	79.8036	262.979	75.4683	262.961	75.7822	262.938	75.984
2.94362	262.538	95.6243	262.463	98.0436	262.429	99.1219	262.72	78.7052	262.664	79.3286	262.623	79.8035	262.978	75.4852	262.959	75.8489	262.937	75.989
2.96365	262.536	95.6791	262.462	98.0777	262.429	99.1421	262.72	78.6928	262.663	79.3338	262.621	79.8267	262.977	75.475	262.956	75.8707	262.936	75.989
2.98368	262.534	95.7549	262.461	98.1171	262.428	99.1622	262.718	78.7131	262.662	79.344	262.619	79.8798	262.977	75.4862	262.954	75.8595	262.936	75.987
3.00371	262.532	95.818	262.46	98.153	262.428	99.1832	262.717	78.7432	262.661	79.3487	262.617	79.9131	262.977	75.4717	262.955	75.841	262.936	75.983
3.02373	262.53	95.8806	262.458	98.1912	262.427	99.2026	262.716	78.7463	262.66	79.3661	262.615	79.9391	262.977	75.4598	262.957	75.8126	262.936	75.981
3.04376	262.528	95.9546	262.457	98.2267	262.426	99.2206	262.715	78.7487	262.659	79.3596	262.614	79.9499	262.979	75.4617	262.959	75.7937	262.937	75.982
3.06379	262.526	96.0193	262.456	98.2627	262.426	99.2409	262.714	78.747	262.658	79.3843	262.614	79.9236	262.979	75.4669	262.959	75.8111	262.937	75.991
3.08381	262.524	96.0853	262.455	98.301	262.425	99.2609	262.714	78.724	262.657	79.3843	262.613	79.9551	262.979	75.4892	262.957	75.8186	262.937	76.004
3.10384	262.521	96.1521	262.454	98.3364	262.425	99.2802	262.713	78.7187	262.655	79.4135	262.613	79.9362	262.978	75.5188	262.956	75.822	262.937	76.022
3.12387	262.52	96.2107	262.453	98.3705	262.424	99.2979	262.712	78.7307	262.653	79.4408	262.612	79.9245	262.977	75.5242	262.956	75.8216	262.937	76.037
3.1439	262.518	96.2595	262.452	98.4003	262.423	99.3152	262.711	78.7382	262.653	79.4447	262.61	79.9872	262.975	75.5499	262.959	75.7957	262.938	76.042
3.16392	262.516	96.3169	262.451	98.4307	262.423	99.3315	262.71	78.7516	262.652	79.4452	262.608	80.0002	262.976	75.5418	262.961	75.7925	262.937	76.04
3.18395	262.514	96.3778	262.45	98.4625	262.422	99.346	262.708	78.7703	262.651	79.4564	262.607	80.0131	262.977	75.5134	262.96	75.8396	262.936	76.036
3.20398	262.513	96.4354	262.449	98.4941	262.422	99.3625	262.708	78.7679	262.649	79.4775	262.607	80.0087	262.976	75.5102	262.954	75.9017	262.935	76.028
3.22401	262.511	96.4886	262.448	98.5217	262.421	99.3769	262.707	78.7747	262.648	79.5068	262.606	80.017	262.976	75.5056	262.951	75.932	262.934	76.02
3.24403	262.509	96.5438	262.447	98.5508	262.421	99.391	262.706	78.7836	262.648	79.4872	262.605	80.015	262.977	75.5093	262.952	75.903	262.934	76.013
3.26406	262.508	96.5931	262.446	98.5775	262.421	99.4062	262.704	78.7937	262.647	79.4916	262.605	80.0169	262.977	75.5002	262.956	75.8549	262.934	76.008
3.28409	262.506	96.6514	262.446	98.6021	262.42	99.4228	262.703	78.8022	262.645	79.5196	262.603	80.062	262.979	75.4809	262.958	75.8381	262.935	76.008
3.30411	262.504	96.706	262.445	98.6274	262.42	99.4345	262.702	78.8154	262.643	79.5495	262.601	80.0805	262.98	75.4843	262.957	75.8388	262.935	76.013
3.32414	262.503	96.7588	262.444	98.6513	262.419	99.4477	262.702	78.7892	262.642	79.5712	262.6	80.095	262.979	75.5068	262.955	75.8563	262.936	76.019
3.34417	262.501	96.8122	262.443	98.6761	262.419	99.4618	262.702	78.7817	262.641	79.5919	262.599	80.1037	262.978	75.5313	262.955	75.8539	262.936	76.031
3.3642	262.5	96.8562	262.442	98.702	262.418	99.4729	262.701	78.785	262.64	79.5748	262.599	80.1097	262.978	75.5332	262.957	75.832	262.937	76.043
3.38422	262.498	96.9094	262.441	98.729	262.418	99.4853	262.7	78.8045	262.64	79.5737	262.598	80.1101	262.976	75.5396	262.96	75.8144	262.937	76.047
3.40425	262.497	96.9545	262.441	98.7536	262.418	99.4967	262.698	78.823	262.639	79.5774	262.598	80.1024	262.977	75.5428	262.959	75.8483	262.937	76.048
3.42428	262.495	97.003	262.44	98.7767	262.417	99.5095	262.697	78.8443	262.638	79.5836	262.597	80.1089	262.977	75.5303	262.955	75.8754	262.936	76.052
3.4443	262.494	97.0494	262.439	98.8007	262.417	99.5216	262.696	78.8619	262.638	79.5837	262.597	80.0898	262.978	75.5358	262.955	75.8757	262.936	76.057
3.46433	262.492	97.0923	262.439	98.8234	262.416	99.5328	262.694	78.8848	262.637	79.5683	262.596	80.092	262.978	75.5533	262.955	75.8611	262.936	76.068
3.48436	262.491	97.1401	262.438	98.8456	262.416	99.541	262.692	78.9114	262.637	79.5711	262.595	80.1218	262.977	75.5619	262.958	75.8141	262.937	76.083
3.50439	262.49	97.1884	262.437	98.8658	262.416	99.5497	262.691	78.9336	262.637	79.5471	262.594	80.1213	262.974	75.5996	262.959	75.7824	262.938	76.089
3.52441	262.488	97.2334	262.437	98.8886	262.415	99.5595	262.689	78.9598	262.636	79.5472	262.591	80.1848	262.973	75.6062	262.959	75.7948	262.938	76.082
3.54444	262.487	97.272	262.436	98.9098	262.415	99.5715	262.689	78.9552	262.635	79.5508	262.591	80.1895	262.974	75.5629	262.959	75.7847	262.939	76.067
3.56447	262.485	97.323	262.435	98.9307	262.415	99.5819	262.689	78.9363	262.634	79.562	262.59	80.2089	262.976	75.5198	262.959	75.7813	262.939	76.045
3.58449	262.484	97.3669	262.435	98.9528	262.414	99.5917	262.689	78.9221	262.633	79.5931	262.591	80.143	262.978	75.4876	262.959	75.776	262.939	76.025
3.60452	262.483	97.4073	262.434	98.9765	262.414	99.6022	262.688	78.9277	262.631	79.6165	262.592	80.0995	262.979	75.4901	262.961	75.7693	262.94	76.021
3.62455	262.482	97.4472	262.433	98.997	262.413	99.609	262.687	78.9418	262.631	79.6229	262.592	80.0863	262.979	75.5065	262.962	75.7779	262.94	76.027
3.64458	262.481	97.4839	262.433	99.0175	262.413	99.6175	262.686	78.9541	262.63	79.6266	262.591	80.1074	262.978	75.5405	262.961	75.7963	262.939	76.041
3.6646	262.479	97.5231	262.432	99.0359	262.413	99.6224	262.685	78.9602	262.63	79.6024	262.589	80.1514	262.979	75.5486	262.959	75.8555	262.938	76.058
3.68463	262.478	97.5591	262.431	99.0535	262.413	99.6296	262.684	78.9624	262.63	79.5784	262.588	80.1747	262.978	75.5606	262.956	75.8614	262.937	76.07
3.70466	262.477	97.5954	262.431	99.0722	262.412	99.6354	262.683	78.9777	262.629	79.6045	262.587	80.1908	262.977	75.572	262.956	75.8494	262.937	76.073
3.72468	262.476	97.6329	262.43	99.0906	262.412	99.641	262.681	79.001	262.628	79.6283	262.585	80.2079	262.976	75.5699	262.958	75.8294	262.937	76.073
3.74471	262.475	97.6738	262.43	99.1097	262.412	99.6471	262.68	79.013	262.626	79.6668	262.585	80.2226	262.976	75.5519	262.96	75.8003	262.937	76.07
3.76474	262.473	97.7149	262.429	99.1283	262.411	99.6533	262.679	79.0335	262.625	79.6672	262.584	80.2322	262.976	75.5504	262.958	75.8096	262.937	76.06
3.78477	262.472	97.7524	262.429	99.1438	262.411	99.6588	262.678	79.0561	262.625	79.6515	262.583	80.24	262.977	75.5466	262.957	75.8258	262.938	76.052
3.80479	262.471	97.7936	262.428	99.1599	262.411	99.6644	262.677	79.0645	262.625	79.6268	262.582	80.2615	262.978	75.524	262.957	75.859	262.937	76.051
3.82482	262.47	97.828	262.428	99.177	262.411	99.67	262.677	79.0519	262.624	79.6399	262.58	80.2911	262.978	75.5275	262.959	75.8298	262.938	76.054
3.84485	262.469	97.8625	262.427	99.1936	262.41	99.6774	262.676	79.0377	262.623	79.6555	262.58	80.2949	262.977	75.5466	262.959	75.817	262.938	76.055
3.86487	262.468	97.8952	262.426	99.211	262.41	99.6836	262.675	79.0566	262.621	79.7058	262.58	80.2809	262.975	75.5664	262.959	75.8147	262.938	76.054
3.8849	262.467	97.9293	262.426	99.2267	262.41	99.6884	262.674	79.0693	262.62	79.7227	262.579	80.2978	262.975	75.5529	262.958	75.8358	262.938	76.048
3.90493	262.466	97.9623	262.425	99.2435	262.41	99.6928	262.674	79.0626	262.619	79.7236	262.577	80.3215	262.977	75.5184	262.958	75.8361	262.938	76.034
3.92496	262.465	97.9936	262.425	99.2573	262.409	99.6971	262.673	79.0652	262.619	79.7055	262.577	80.3325	262.978	75.4952	262.958	75.8291	262.938	76.019
3.94498	262.464	98.0223	262.425	99.2696	262.409	99.701	262.673	79.064	262.62	79.6766	262.576	80.3523	262.979	75.479	262.959	75.8115	262.938	76.009
3.96501	262.463	98.052	262.424	99.2818	262.409	99.7047	262.672	79.05	262.619	79.684	262.575	80.3462	262.98	75.4919	262.96	75.8025	262.939	76.008
3.98504	262.462	98.0844	262.424	99.297	262.409	99.7082	262.671	79.0724	262.618	79.7085	262.575	80.3455	262.981	75.5012	262.96	75.8334	262.939	76.017
4.00506	262.461	98.1147	262.423	99.3116	262.408	99.7117	262.67	79.0889	262.616	79.7469	262.576	80.3106	262.98	75.5111	262.96	75.844	262.939	76.027
4.02509	262.46	98.1404	262.423	99.327	262.408	99.7157	262.669	79.1129	262.614	79.7917	262.575	80.308	262.979	75.5416	262.959	75.8595	262.938	76.036
4.04512	262.459	98.1724	262.422	99.3403	262.408	99.7186	262.667	79.1308	262.613	79.8063	262.576	80.273	262.979	75.5311	262.957	75.8742	262.937	76.042
4.06515	262.458	98.2033	262.422	99.3538	262.408	99.7227	262.667	79.1344	262.613	79.799	262.575	80.287	262.979	75.5364	262.956	75.845	262.937	76.049
4.08517	262.458	98.2251	262.421	99.367	262.408	99.7266	262.667	79.1179	262.613	79.7656	262.575	80.2891	262.979	75.5295	262.957	75.8284	262.937	76.052
4.1052	262.457	98.2529	262.421	99.379	262.407	99.7296	262.666	79.1112	262.613	79.7593	262.575	80.2792	262.978	75.5466	262.959	75.7931	262.938	76.055
4.12523	262.456	98.278	262.421	99.39	262.407	99.7331	262.666	79.1032	262.613	79.7605	262.575	80.2404	262.977	75.5582	262.961	75.7721	262.939	76.058
4.14525	262.455	98.3014	262.42	99.4028	262.407	99.7364	262.665	79.1039	262.611	79.7874	262.575	80.2332	262.977	75.5465	262.962	75.7874	262.94	76.057
4.16528	262.455	98.3269	262.42	99.4128	262.407	99.7389	262.665	79.1062	262.61	79.8122	262.575	80.2261	262.977	75.5481	262.961	75.8291	262.939	76.052
4.18531	262.454	98.356	262.42	99.4213	262.406	99.7419	262.664	79.1133	262.609	79.8189	262.573	80.2737	262.977	75.5256	262.959	75.8668	262.938	76.044
4.20534	262.453	98.3806	262.419	99.4299	262.406	99.7448	262.663	79.1321	262.609	79.8022	262.571	80.3256	262.978	75.5225	262.957	75.8777	262.938	76.041
4.22536	262.452	98.4025	262.419	99.4407	262.406	99.7472	262.662	79.1549	262.608	79.8124	262.571	80.3288	262.978	75.5184	262.956	75.8709	262.937	76.037
4.24539	262.451	98.4252	262.418	99.4506	262.406	99.7496	262.66	79.1691	262.608	79.8238	262.57	80.3488	262.978	75.5319	262.957	75.8503	262.938	76.036
4.26542	262.451	98.4453	262.418	99.4606	262.406	99.7525	262.66	79.1694	262.607	79.8275	262.569	80.3446	262.979	75.5286	262.96	75.8098	262.938	76.036
4.28544	262.45	98.468	262.418	99.4709	262.406	99.7546	262.659	79.1674	262.607	79.8158	262.569	80.3321	262.979	75.5167	262.961	75.805	262.938	76.041
4.30547	262.449	98.491	262.417	99.4792	262.405	99.7571	262.659	79.1716	262.607	79.8048	262.568	80.3465	262.979	75.524	262.959	75.8194	262.939	76.043
4.3255	262.449	98.5126	262.417	99.4882	262.405	99.7594	262.658	79.185	262.607	79.7958	262.567	80.3702	262.979	75.5428	262.957	75.8518	262.939	76.043
4.34553	262.448	98.5363	262.417	99.497	262.405	99.7623	262.657	79.1894	262.606	79.7983	262.566	80.3868	262.978	75.5429	262.958	75.842	262.938	76.044
4.36555	262.447	98.5553	262.416	99.5046	262.405	99.7647	262.657	79.1836	262.606	79.8049	262.566	80.3922	262.978	75.5305	262.96	75.8328	262.938	76.041
4.38558	262.446	98.5767	262.416	99.5127	262.405	99.767	262.656	79.1924	262.605	79.813	262.565	80.3932	262.977	75.5212	262.959	75.8564	262.938	76.03
4.40561	262.446	98.5957	262.416	99.5224	262.404	99.7692	262.656	79.1817	262.604	79.8381	262.564	80.4196	262.978	75.5103	262.959	75.8714	262.938	76.017
4.42563	262.445	98.6146	262.415	99.5305	262.404	99.7713	262.656	79.1736	262.603	79.8353	262.562	80.4757	262.98	75.4862	262.957	75.8703	262.937	76.01
4.44566	262.445	98.6337	262.415	99.5386	262.404	99.7732	262.655	79.1781	262.602	79.8496	262.561	80.4909	262.98	75.4757	262.956	75.8697	262.937	76.009
4.46569	262.444	98.6541	262.415	99.545	262.404	99.7758	262.654	79.1822	262.602	79.8559	262.561	80.4849	262.98	75.4948	262.957	75.8353	262.937	76.014
4.48572	262.443	98.6742	262.415	99.5518	262.404	99.778	262.654	79.1808	262.6	79.8834	262.562	80.4614	262.98	75.5201	262.959	75.8001	262.938	76.024
4.50574	262.443	98.6916	262.414	99.5585	262.403	99.7796	262.653	79.1975	262.6	79.8946	262.562	80.4443	262.98	75.5335	262.96	75.7788	262.939	76.043
4.52577	262.442	98.7107	262.414	99.5655	262.403	99.7811	262.652	79.208	262.599	79.8907	262.56	80.4856	262.98	75.5373	262.961	75.8002	262.94	76.06
4.5458	262.441	98.7304	262.414	99.5712	262.403	99.7828	262.651	79.2184	262.598	79.9039	262.559	80.519	262.978	75.5697	262.961	75.8075	262.94	76.073
4.56583	262.441	98.7509	262.413	99.5766	262.403	99.7845	262.65	79.2311	262.598	79.9122	262.557	80.5644	262.977	75.578	262.962	75.8245	262.94	76.081
4.58585	262.44	98.7718	262.413	99.5826	262.403	99.7863	262.65	79.2189	262.597	79.9286	262.556	80.5668	262.976	75.5854	262.96	75.8551	262.939	76.082
4.60588	262.44	98.7915	262.413	99.5878	262.403	99.7881	262.65	79.2144	262.596	79.9418	262.557	80.5399	262.976	75.5727	262.957	75.8759	262.938	76.077
4.62591	262.439	98.8087	262.413	99.5938	262.402	99.7902	262.65	79.2054	262.596	79.9443	262.558	80.5131	262.977	75.5444	262.957	75.8796	262.938	76.072
4.64593	262.439	98.8242	262.412	99.5992	262.402	99.7923	262.649	79.2147	262.595	79.9583	262.557	80.5051	262.978	75.5443	262.958	75.8617	262.937	76.068
4.66596	262.438	98.8421	262.412	99.6029	262.402	99.794	262.648	79.2367	262.596	79.9219	262.556	80.5327	262.979	75.5533	262.959	75.8262	262.938	76.07
4.68599	262.437	98.8635	262.412	99.607	262.402	99.7957	262.646	79.2596	262.596	79.9064	262.556	80.5422	262.979	75.5638	262.959	75.8291	262.938	76.08
4.70601	262.437	98.8837	262.412	99.6109	262.402	99.7975	262.646	79.2619	262.595	79.9048	262.554	80.5863	262.977	75.5857	262.959	75.8489	262.938	76.093
4.72604	262.436	98.9017	262.412	99.6155	262.402	99.7994	262.645	79.2627	262.595	79.8987	262.554	80.5791	262.978	75.5952	262.959	75.8481	262.938	76.101
4.74607	262.436	98.9193	262.411	99.6198	262.401	99.801	262.645	79.2751	262.594	79.9208	262.554	80.5608	262.977	75.6055	262.959	75.8554	262.938	76.106
4.7661	262.435	98.9362	262.411	99.623	262.401	99.8029	262.644	79.2858	262.592	79.9743	262.553	80.5735	262.977	75.596	262.959	75.8531	262.938	76.106
4.78612	262.435	98.9506	262.411	99.627	262.401	99.8049	262.642	79.3161	262.591	79.9897	262.552	80.6098	262.976	75.5875	262.959	75.8659	262.938	76.107
4.80615	262.434	98.9659	262.411	99.6319	262.401	99.807	262.641	79.3539	262.59	80.0141	262.552	80.6053	262.977	75.5878	262.958	75.8572	262.938	76.106
4.82618	262.434	98.9795	262.41	99.6351	262.401	99.8082	262.639	79.3756	262.59	80.0075	262.552	80.6001	262.978	75.5986	262.958	75.8538	262.938	76.109
4.84621	262.433	98.9938	262.41	99.6394	262.401	99.8095	262.639	79.3774	262.591	79.9657	262.553	80.5595	262.978	75.6013	262.958	75.8427	262.938	76.118
4.86623	262.433	99.0111	262.41	99.6424	262.401	99.8108	262.638	79.3779	262.591	79.9498	262.552	80.5595	262.977	75.6121	262.959	75.8121	262.939	76.13
4.88626	262.432	99.0257	262.41	99.6459	262.4	99.8125	262.638	79.3875	262.59	79.9609	262.552	80.5619	262.976	75.6297	262.961	75.7983	262.939	76.139
4.90629	262.432	99.0399	262.41	99.6504	262.4	99.8139	262.637	79.4025	262.589	79.9722	262.551	80.58	262.974	75.6502	262.962	75.802	262.939	76.142
4.92631	262.431	99.056	262.409	99.6544	262.4	99.8154	262.636	79.4236	262.588	80.004	262.55	80.623	262.975	75.6417	262.96	75.8381	262.939	76.139
4.94634	262.431	99.0723	262.409	99.6587	262.4	99.8172	262.635	79.4283	262.587	80.024	262.548	80.6555	262.976	75.6174	262.958	75.8675	262.939	76.132
4.96637	262.43	99.0863	262.409	99.6626	262.4	99.8189	262.634	79.4353	262.585	80.064	262.546	80.7023	262.977	75.5972	262.958	75.8536	262.938	76.123
4.98639	262.43	99.0996	262.409	99.6666	262.4	99.8204	262.634	79.4333	262.585	80.0672	262.545	80.7489	262.977	75.5957	262.959	75.8477	262.938	76.117
5.00642	262.429	99.1161	262.408	99.6701	262.399	99.8217	262.633	79.4446	262.584	80.0801	262.543	80.7876	262.977	75.6052	262.96	75.8135	262.938	76.117
5.02645	262.429	99.1287	262.408	99.6741	262.399	99.8233	262.632	79.4694	262.584	80.0711	262.542	80.8258	262.977	75.6081	262.96	75.8134	262.939	76.12
5.04648	262.429	99.14	262.408	99.6776	262.399	99.8245	262.631	79.4931	262.584	80.0652	262.541	80.8276	262.977	75.6214	262.958	75.8048	262.939	76.123
5.0665	262.428	99.1504	262.408	99.6807	262.399	99.8258	262.63	79.5128	262.583	80.0725	262.541	80.8196	262.978	75.6115	262.959	75.8069	262.939	76.127
5.08653	262.428	99.1596	262.408	99.6834	262.399	99.827	262.629	79.5239	262.582	80.093	262.542	80.7883	262.977	75.6087	262.959	75.7877	262.939	76.13
5.10656	262.428	99.1691	262.407	99.6866	262.399	99.8282	262.628	79.5261	262.581	80.1218	262.542	80.7876	262.977	75.6283	262.961	75.7906	262.94	76.13
5.12659	262.427	99.1795	262.407	99.6892	262.399	99.8294	262.628	79.518	262.581	80.1246	262.542	80.7621	262.976	75.6214	262.962	75.7857	262.94	76.129
5.14661	262.427	99.1922	262.407	99.6919	262.399	99.8305	262.629	79.4987	262.58	80.1472	262.542	80.7651	262.977	75.6186	262.962	75.8055	262.94	76.13
5.16664	262.426	99.203	262.407	99.694	262.398	99.8318	262.629	79.4827	262.58	80.1321	262.541	80.7817	262.978	75.6085	262.961	75.8273	262.94	76.131
5.18667	262.426	99.2134	262.407	99.696	262.398	99.8331	262.629	79.4659	262.579	80.1499	262.541	80.794	262.977	75.6151	262.958	75.8428	262.939	76.133
5.20669	262.426	99.2263	262.406	99.6989	262.398	99.8345	262.628	79.4681	262.578	80.178	262.54	80.8105	262.977	75.6303	262.959	75.8157	262.939	76.138
5.22672	262.425	99.2386	262.406	99.701	262.398	99.8356	262.628	79.4817	262.577	80.1913	262.539	80.8375	262.977	75.6348	262.96	75.7983	262.939	76.147
5.24675	262.425	99.2482	262.406	99.7036	262.398	99.8369	262.627	79.4766	262.576	80.2128	262.539	80.8328	262.976	75.6437	262.962	75.777	262.94	76.151
5.26677	262.425	99.2578	262.406	99.7063	262.398	99.838	262.626	79.4945	262.575	80.2192	262.537	80.8645	262.975	75.6528	262.962	75.7992	262.939	76.149
5.2868	262.424	99.2653	262.406	99.7093	262.398	99.8391	262.625	79.522	262.576	80.1932	262.536	80.8904	262.976	75.6343	262.959	75.8401	262.939	76.147
5.30683	262.424	99.2718	262.405	99.7114	262.397	99.8403	262.624	79.5343	262.576	80.173	262.536	80.8847	262.977	75.6219	262.957	75.8589	262.938	76.144
5.32686	262.424	99.2804	262.405	99.7148	262.397	99.8416	262.623	79.5456	262.577	80.1418	262.536	80.8995	262.977	75.6213	262.958	75.851	262.938	76.136
5.34688	262.423	99.2907	262.405	99.7179	262.397	99.8428	262.623	79.541	262.577	80.1383	262.536	80.8871	262.975	75.6315	262.96	75.8178	262.938	76.129
5.36691	262.423	99.2996	262.405	99.7199	262.397	99.8442	262.623	79.5314	262.577	80.1362	262.535	80.9152	262.976	75.6106	262.96	75.8019	262.939	76.123
5.38694	262.423	99.3093	262.405	99.7229	262.397	99.8452	262.624	79.5106	262.577	80.1315	262.534	80.9171	262.977	75.5994	262.959	75.8157	262.939	76.119
5.40696	262.422	99.3196	262.404	99.7255	262.397	99.8463	262.623	79.52	262.576	80.1326	262.534	80.9204	262.979	75.591	262.959	75.8352	262.938	76.116
5.42699	262.422	99.3282	262.404	99.7279	262.397	99.8474	262.622	79.5319	262.576	80.1289	262.533	80.9564	262.979	75.6024	262.958	75.826	262.938	76.122
5.44702	262.422	99.3359	262.404	99.7297	262.397	99.8486	262.621	79.5426	262.575	80.142	262.532	80.9562	262.978	75.6157	262.958	75.8217	262.939	76.13
5.46705	262.421	99.3441	262.404	99.7318	262.396	99.8497	262.621	79.5357	262.575	80.1406	262.532	80.9635	262.978	75.6419	262.96	75.8141	262.939	76.14
5.48707	262.421	99.3551	262.404	99.7332	262.396	99.8508	262.621	79.5243	262.574	80.1702	262.531	80.9809	262.978	75.6397	262.961	75.8199	262.939	76.15
5.5071	262.421	99.3636	262.404	99.7358	262.396	99.8518	262.622	79.5046	262.574	80.1688	262.531	80.9866	262.976	75.6398	262.96	75.8367	262.938	76.152
5.52713	262.42	99.3687	262.403	99.7378	262.396	99.8528	262.621	79.5032	262.573	80.1691	262.531	80.9771	262.975	75.6516	262.957	75.8724	262.937	76.148
5.54716	262.42	99.3761	262.403	99.7398	262.396	99.8538	262.621	79.504	262.573	80.1733	262.529	81.013	262.975	75.6294	262.955	75.9077	262.937	76.14
5.56718	262.42	99.3832	262.403	99.7417	262.396	99.8549	262.621	79.4999	262.573	80.1709	262.529	81.0145	262.976	75.6197	262.956	75.8605	262.937	76.129
5.58721	262.419	99.3907	262.403	99.7437	262.396	99.8559	262.62	79.5165	262.572	80.1802	262.53	80.9973	262.977	75.6003	262.958	75.836	262.937	76.115
5.60724	262.419	99.3982	262.403	99.7452	262.396	99.8569	262.619	79.5204	262.571	80.1933	262.53	80.9708	262.978	75.5835	262.961	75.8234	262.938	76.109
5.62726	262.419	99.4045	262.403	99.7469	262.396	99.8578	262.619	79.513	262.57	80.2327	262.53	80.9617	262.978	75.5848	262.96	75.845	262.938	76.106
5.64729	262.419	99.4104	262.402	99.7491	262.395	99.8589	262.619	79.5152	262.569	80.2457	262.529	81.0019	262.978	75.5985	262.958	75.8912	262.938	76.105
5.66732	262.418	99.4164	262.402	99.7509	262.395	99.86	262.618	79.5222	262.569	80.2515	262.527	81.0581	262.98	75.601	262.956	75.9178	262.937	76.114
5.68735	262.418	99.423	262.402	99.7524	262.395	99.8611	262.617	79.5332	262.57	80.2206	262.525	81.1075	262.98	75.5976	262.956	75.9132	262.936	76.131
5.70737	262.418	99.4301	262.402	99.754	262.395	99.8622	262.617	79.5474	262.569	80.2219	262.525	81.1171	262.978	75.6301	262.957	75.8756	262.936	76.14
5.7274	262.418	99.4365	262.402	99.7555	262.395	99.8636	262.616	79.553	262.569	80.2131	262.526	81.0701	262.976	75.6672	262.957	75.8635	262.937	76.147
5.74743	262.417	99.4425	262.402	99.7572	262.395	99.8645	262.615	79.5695	262.569	80.213	262.526	81.0493	262.976	75.6459	262.958	75.8391	262.938	76.152
5.76745	262.417	99.4476	262.402	99.7588	262.395	99.8655	262.614	79.589	262.568	80.2333	262.527	81.0307	262.977	75.6359	262.959	75.8335	262.938	76.15
5.78748	262.417	99.4535	262.401	99.7603	262.395	99.8664	262.613	79.6084	262.567	80.2466	262.527	81.0045	262.977	75.6206	262.961	75.8372	262.938	76.141
5.80751	262.417	99.4593	262.401	99.7623	262.395	99.8673	262.613	79.6079	262.566	80.2701	262.526	81.0381	262.977	75.6229	262.959	75.8372	262.938	76.138
5.82754	262.416	99.4663	262.401	99.7636	262.394	99.8681	262.613	79.5952	262.565	80.3019	262.524	81.1062	262.977	75.6201	262.959	75.8542	262.938	76.136
5.84756	262.416	99.4718	262.401	99.7653	262.394	99.869	262.613	79.5772	262.564	80.3216	262.522	81.1451	262.977	75.6331	262.958	75.8407	262.938	76.137
5.86759	262.416	99.478	262.401	99.7669	262.394	99.8699	262.613	79.5865	262.564	80.3111	262.522	81.1461	262.978	75.6238	262.959	75.8208	262.939	76.138
5.88762	262.415	99.4841	262.401	99.7681	262.394	99.8709	262.612	79.5874	262.564	80.2989	262.522	81.1397	262.978	75.6247	262.96	75.8017	262.939	76.138
5.90764	262.415	99.4892	262.4	99.7698	262.394	99.8717	262.611	79.6067	262.565	80.2864	262.524	81.0736	262.978	75.6267	262.962	75.7978	262.94	76.136
5.92767	262.415	99.494	262.4	99.7713	262.394	99.8726	262.61	79.6357	262.564	80.2951	262.525	81.0531	262.977	75.6208	262.961	75.8143	262.94	76.135
5.9477	262.415	99.4987	262.4	99.7727	262.394	99.8736	262.609	79.6545	262.563	80.3372	262.524	81.0663	262.976	75.6232	262.959	75.828	262.939	76.131
5.96773	262.415	99.5027	262.4	99.774	262.394	99.8745	262.608	79.6738	262.561	80.3631	262.523	81.0864	262.976	75.6195	262.958	75.8428	262.939	76.127
5.98775	262.414	99.508	262.4	99.7753	262.394	99.8754	262.607	79.6889	262.561	80.3807	262.523	81.0862	262.977	75.606	262.959	75.8219	262.939	76.125
6.00778	262.414	99.5139	262.4	99.7768	262.394	99.8763	262.607	79.6847	262.56	80.4048	262.523	81.0949	262.978	75.6047	262.962	75.8117	262.939	76.121
6.02781	262.414	99.5199	262.4	99.7781	262.393	99.8771	262.608	79.6614	262.559	80.4033	262.523	81.0726	262.978	75.61	262.961	75.8366	262.939	76.12
6.04783	262.414	99.5248	262.399	99.7792	262.393	99.878	262.608	79.6534	262.56	80.3804	262.523	81.0688	262.978	75.6063	262.959	75.8654	262.938	76.123
6.06786	262.413	99.5283	262.399	99.7805	262.393	99.8789	262.607	79.6654	262.561	80.3573	262.523	81.0718	262.978	75.6135	262.956	75.8903	262.938	76.128
6.08789	262.413	99.5324	262.399	99.7817	262.393	99.8797	262.606	79.6808	262.561	80.3367	262.522	81.0905	262.977	75.6231	262.957	75.888	262.937	76.131
6.10792	262.413	99.5372	262.399	99.783	262.393	99.8806	262.605	79.7079	262.561	80.3359	262.521	81.1263	262.977	75.6268	262.958	75.8432	262.938	76.134
6.12794	262.413	99.5406	262.399	99.7843	262.393	99.8815	262.604	79.7394	262.56	80.3489	262.519	81.1702	262.977	75.6257	262.96	75.8185	262.939	76.134
6.14797	262.412	99.5452	262.399	99.7857	262.393	99.8823	262.603	79.7468	262.559	80.377	262.519	81.1704	262.977	75.6215	262.961	75.8169	262.939	76.13
6.168	262.412	99.5486	262.399	99.7871	262.393	99.8832	262.603	79.7566	262.558	80.4134	262.518	81.189	262.977	75.6158	262.96	75.8374	262.938	76.128
6.18802	262.412	99.552	262.399	99.7885	262.393	99.8841	262.602	79.7547	262.556	80.4452	262.517	81.2341	262.978	75.6021	262.958	75.8822	262.938	76.128
6.20805	262.412	99.5552	262.398	99.7899	262.393	99.8849	262.602	79.7666	262.556	80.4372	262.516	81.2627	262.979	75.6159	262.956	75.8899	262.938	76.129
6.22808	262.412	99.5596	262.398	99.7911	262.392	99.8858	262.601	79.7709	262.557	80.405	262.517	81.2318	262.978	75.6251	262.958	75.866	262.938	76.134
6.24811	262.411	99.5634	262.398	99.7923	262.392	99.8865	262.601	79.7649	262.558	80.3907	262.518	81.1879	262.977	75.6285	262.96	75.8593	262.938	76.139
6.26813	262.411	99.5662	262.398	99.7937	262.392	99.8873	262.602	79.7405	262.557	80.4069	262.519	81.1456	262.977	75.6364	262.959	75.8826	262.937	76.142
6.28816	262.411	99.5695	262.398	99.7951	262.392	99.8881	262.602	79.7308	262.555	80.4509	262.52	81.1035	262.977	75.6317	262.956	75.9052	262.937	76.144
6.30819	262.411	99.572	262.398	99.7963	262.392	99.8888	262.601	79.7416	262.553	80.4969	262.519	81.1297	262.977	75.6302	262.955	75.914	262.936	76.144
6.32822	262.411	99.5755	262.398	99.7976	262.392	99.8896	262.6	79.7573	262.552	80.5411	262.517	81.1877	262.976	75.633	262.956	75.8924	262.936	76.143
6.34824	262.41	99.5792	262.397	99.7988	262.392	99.8904	262.6	79.7574	262.551	80.5581	262.516	81.2233	262.976	75.6299	262.956	75.8724	262.936	76.14
6.36827	262.41	99.5824	262.397	99.7999	262.392	99.8913	262.599	79.7716	262.551	80.5389	262.516	81.2137	262.976	75.6302	262.957	75.8529	262.937	76.137
6.3883	262.41	99.5847	262.397	99.8011	262.392	99.8921	262.6	79.7517	262.551	80.536	262.517	81.1845	262.977	75.6152	262.96	75.8539	262.937	76.134
6.40832	262.41	99.5886	262.397	99.8023	262.392	99.8929	262.6	79.7457	262.551	80.5337	262.518	81.1536	262.978	75.6153	262.96	75.8569	262.937	76.132
6.42835	262.41	99.5913	262.397	99.8036	262.392	99.8937	262.6	79.7371	262.55	80.5612	262.52	81.0869	262.978	75.6213	262.956	75.903	262.937	76.134
6.44838	262.409	99.5942	262.397	99.8051	262.392	99.8944	262.6	79.7207	262.549	80.5851	262.519	81.0982	262.978	75.6193	262.956	75.8921	262.937	76.142
6.4684	262.409	99.5971	262.397	99.8066	262.391	99.8952	262.599	79.7266	262.549	80.5807	262.517	81.172	262.977	75.6412	262.957	75.8639	262.937	76.148
6.48843	262.409	99.6005	262.397	99.8077	262.391	99.896	262.599	79.7366	262.549	80.5925	262.514	81.2467	262.976	75.651	262.96	75.8639	262.938	76.152
6.50846	262.409	99.6028	262.396	99.8089	262.391	99.8968	262.598	79.7471	262.549	80.5829	262.514	81.2549	262.976	75.6473	262.96	75.8693	262.937	76.153
6.52849	262.409	99.6051	262.396	99.8099	262.391	99.8976	262.598	79.749	262.549	80.5808	262.513	81.2702	262.977	75.6396	262.958	75.9003	262.937	76.151
6.54851	262.409	99.6078	262.396	99.8109	262.391	99.8984	262.598	79.7487	262.548	80.5877	262.513	81.2673	262.977	75.6279	262.955	75.9216	262.936	76.145
6.56854	262.408	99.6108	262.396	99.8122	262.391	99.8991	262.598	79.7424	262.548	80.6002	262.514	81.2492	262.977	75.6288	262.956	75.9093	262.936	76.141
6.58857	262.408	99.6134	262.396	99.8133	262.391	99.8998	262.597	79.7411	262.548	80.5694	262.512	81.2949	262.977	75.6213	262.957	75.8931	262.936	76.138
6.6086	262.408	99.6162	262.396	99.8144	262.391	99.9006	262.596	79.7629	262.549	80.5521	262.512	81.287	262.978	75.6263	262.959	75.8669	262.937	76.137
6.62862	262.408	99.6189	262.396	99.8155	262.391	99.9013	262.596	79.7795	262.549	80.5387	262.512	81.2955	262.978	75.6275	262.958	75.8836	262.937	76.136
6.64865	262.408	99.6216	262.396	99.8167	262.391	99.9019	262.595	79.7838	262.549	80.5402	262.512	81.2781	262.978	75.6207	262.958	75.8989	262.937	76.14
6.66868	262.407	99.6238	262.395	99.8178	262.391	99.9027	262.595	79.7899	262.548	80.5496	262.512	81.2853	262.977	75.6238	262.957	75.8853	262.937	76.141
6.6887	262.407	99.6261	262.395	99.8191	262.391	99.9032	262.595	79.7803	262.547	80.5732	262.511	81.3245	262.978	75.6423	262.957	75.8768	262.938	76.143
6.70873	262.407	99.629	262.395	99.8201	262.39	99.904	262.595	79.7649	262.547	80.5826	262.509	81.3728	262.978	75.6305	262.959	75.8379	262.938	76.146
6.72876	262.407	99.6316	262.395	99.8212	262.39	99.9048	262.595	79.7618	262.546	80.5913	262.507	81.4306	262.978	75.6395	262.961	75.8481	262.939	76.15
6.74878	262.407	99.6343	262.395	99.8223	262.39	99.9055	262.595	79.7496	262.545	80.6185	262.507	81.4305	262.978	75.6332	262.961	75.872	262.938	76.153
6.76881	262.406	99.6368	262.395	99.8232	262.39	99.9062	262.595	79.7418	262.545	80.6237	262.508	81.403	262.978	75.6427	262.958	75.8963	262.937	76.158
6.78884	262.406	99.6388	262.395	99.8242	262.39	99.9069	262.595	79.7389	262.544	80.644	262.509	81.3603	262.977	75.6607	262.955	75.9	262.937	76.162
6.80887	262.406	99.6407	262.395	99.8254	262.39	99.9075	262.594	79.7479	262.544	80.6598	262.509	81.3635	262.977	75.6544	262.956	75.8871	262.937	76.168
6.82889	262.406	99.6428	262.394	99.8264	262.39	99.9081	262.595	79.7387	262.542	80.7008	262.509	81.3484	262.977	75.6582	262.958	75.8608	262.938	76.17
6.84892	262.406	99.645	262.394	99.8274	262.39	99.9088	262.594	79.7454	262.541	80.7166	262.509	81.3601	262.975	75.6667	262.961	75.8332	262.938	76.164
6.86895	262.406	99.6465	262.394	99.8284	262.39	99.9094	262.593	79.7627	262.542	80.6986	262.509	81.3555	262.975	75.6509	262.961	75.8469	262.938	76.153
6.88898	262.406	99.6484	262.394	99.8292	262.39	99.9101	262.592	79.7892	262.542	80.6754	262.508	81.3573	262.976	75.6284	262.958	75.881	262.938	76.14
6.909	262.405	99.6504	262.394	99.8301	262.39	99.9108	262.591	79.8275	262.543	80.661	262.508	81.3587	262.978	75.6026	262.956	75.9037	262.938	76.128
6.92903	262.405	99.6528	262.394	99.8311	262.39	99.9115	262.59	79.8476	262.542	80.6892	262.507	81.3858	262.979	75.5909	262.957	75.8724	262.938	76.124
6.94906	262.405	99.6548	262.394	99.832	262.39	99.9122	262.589	79.8507	262.541	80.6965	262.506	81.4292	262.98	75.6084	262.96	75.8408	262.938	76.124
6.96908	262.405	99.6566	262.394	99.833	262.389	99.9128	262.589	79.8614	262.54	80.7372	262.505	81.4596	262.98	75.6296	262.961	75.8374	262.939	76.131
6.98911	262.405	99.6593	262.394	99.8339	262.389	99.9134	262.588	79.8724	262.539	80.7712	262.504	81.4767	262.979	75.6307	262.96	75.8707	262.938	76.14
7.00914	262.405	99.6614	262.394	99.8349	262.389	99.914	262.587	79.8943	262.538	80.7754	262.504	81.471	262.978	75.6364	262.957	75.8872	262.938	76.143
7.02916	262.404	99.6632	262.393	99.8359	262.389	99.9145	262.587	79.8826	262.539	80.7551	262.504	81.4688	262.978	75.6342	262.956	75.8935	262.937	76.138
7.04919	262.404	99.6651	262.393	99.8368	262.389	99.9151	262.588	79.8623	262.539	80.7489	262.505	81.4418	262.978	75.6263	262.958	75.8704	262.938	76.133
7.06922	262.404	99.6673	262.393	99.8377	262.389	99.9157	262.587	79.8722	262.538	80.7634	262.505	81.4285	262.979	75.6053	262.959	75.8532	262.938	76.133
7.08925	262.404	99.6693	262.393	99.8386	262.389	99.9163	262.587	79.884	262.538	80.7587	262.504	81.4582	262.979	75.6053	262.961	75.8671	262.938	76.13
7.10927	262.404	99.6705	262.393	99.8395	262.389	99.9169	262.587	79.8857	262.537	80.786	262.503	81.4759	262.978	75.6335	262.959	75.9039	262.937	76.129
7.1293	262.404	99.6723	262.393	99.8403	262.389	99.9175	262.586	79.8948	262.536	80.8017	262.502	81.5242	262.977	75.6224	262.956	75.9395	262.936	76.127
7.14933	262.403	99.6745	262.393	99.8412	262.389	99.9181	262.585	79.9143	262.536	80.8076	262.501	81.5367	262.976	75.6195	262.954	75.9529	262.935	76.122
7.16936	262.403	99.6761	262.393	99.842	262.389	99.9187	262.585	79.9211	262.537	80.7896	262.502	81.5228	262.978	75.5957	262.955	75.9348	262.935	76.111
7.18938	262.403	99.6775	262.393	99.8429	262.389	99.9194	262.584	79.942	262.537	80.785	262.502	81.4993	262.979	75.5791	262.956	75.9087	262.935	76.105
7.20941	262.403	99.6792	262.393	99.8439	262.389	99.92	262.583	79.9632	262.536	80.7905	262.502	81.5131	262.98	75.5765	262.958	75.8745	262.936	76.104
7.22944	262.403	99.6811	262.392	99.8449	262.389	99.9205	262.582	79.9821	262.535	80.8258	262.503	81.4819	262.98	75.5965	262.957	75.8789	262.936	76.113
7.24946	262.403	99.6825	262.392	99.8457	262.389	99.921	262.582	79.9802	262.534	80.8511	262.502	81.5124	262.98	75.6125	262.956	75.8852	262.936	76.131
7.26949	262.403	99.6841	262.392	99.8466	262.388	99.9215	262.582	79.9691	262.534	80.861	262.501	81.5364	262.979	75.641	262.956	75.8734	262.937	76.154
7.28952	262.402	99.6861	262.392	99.8476	262.388	99.922	262.581	79.9903	262.533	80.8658	262.499	81.581	262.977	75.6668	262.959	75.8425	262.938	76.168
7.30955	262.402	99.6875	262.392	99.8485	262.388	99.9225	262.581	79.9944	262.533	80.8721	262.498	81.6296	262.975	75.6921	262.962	75.8195	262.938	76.174
7.32957	262.402	99.6889	262.392	99.8495	262.388	99.9231	262.581	79.9926	262.532	80.8882	262.497	81.6572	262.975	75.6689	262.961	75.8564	262.938	76.171
7.3496	262.402	99.6904	262.392	99.8505	262.388	99.9236	262.581	79.9915	262.532	80.8888	262.496	81.6696	262.976	75.6418	262.958	75.8937	262.938	76.163
7.36963	262.402	99.6919	262.392	99.8513	262.388	99.9242	262.58	80.006	262.532	80.8786	262.494	81.7337	262.977	75.6264	262.956	75.9034	262.938	76.152
7.38965	262.402	99.694	262.392	99.8521	262.388	99.9247	262.58	80.0103	262.532	80.871	262.493	81.7574	262.978	75.6276	262.957	75.9063	262.938	76.145
7.40968	262.401	99.696	262.392	99.8528	262.388	99.9252	262.579	80.0271	262.532	80.8714	262.493	81.7535	262.978	75.6335	262.959	75.8887	262.937	76.143
7.42971	262.401	99.6977	262.391	99.8536	262.388	99.9257	262.578	80.0485	262.532	80.8816	262.492	81.7737	262.978	75.6358	262.96	75.8988	262.937	76.142
7.44974	262.401	99.6994	262.391	99.8543	262.388	99.9262	262.577	80.0695	262.532	80.886	262.492	81.7679	262.977	75.6327	262.957	75.9497	262.936	76.14
7.46976	262.401	99.7011	262.391	99.8552	262.388	99.9267	262.577	80.0727	262.531	80.8906	262.493	81.7477	262.978	75.621	262.954	75.9588	262.934	76.133
7.48979	262.401	99.7026	262.391	99.856	262.388	99.9273	262.576	80.0884	262.531	80.8934	262.493	81.7463	262.979	75.6153	262.952	75.9739	262.934	76.127
7.50982	262.401	99.7038	262.391	99.8568	262.388	99.9278	262.575	80.0987	262.531	80.9046	262.493	81.7543	262.979	75.5993	262.953	75.9333	262.934	76.126
7.52984	262.401	99.7051	262.391	99.8575	262.388	99.9283	262.575	80.0948	262.53	80.9186	262.492	81.7681	262.98	75.6053	262.956	75.8697	262.936	76.129
7.54987	262.401	99.7066	262.391	99.8583	262.388	99.9289	262.576	80.0816	262.53	80.9092	262.491	81.8151	262.98	75.6303	262.959	75.8513	262.937	76.136
7.5699	262.4	99.7082	262.391	99.8593	262.388	99.9294	262.576	80.073	262.53	80.8999	262.491	81.8104	262.98	75.6369	262.96	75.8654	262.937	76.152
7.58993	262.4	99.7098	262.391	99.8601	262.388	99.9299	262.576	80.0734	262.53	80.9069	262.49	81.8195	262.979	75.6504	262.958	75.9212	262.937	76.168
7.60995	262.4	99.7114	262.391	99.8609	262.388	99.9304	262.575	80.0688	262.529	80.9318	262.491	81.7988	262.977	75.6758	262.956	75.9387	262.937	76.179
7.62998	262.4	99.713	262.391	99.8617	262.387	99.9308	262.575	80.0789	262.529	80.9165	262.492	81.7581	262.977	75.6891	262.957	75.8999	262.937	76.184
7.65001	262.4	99.7145	262.39	99.8624	262.387	99.9313	262.575	80.0874	262.529	80.9148	262.493	81.737	262.977	75.6809	262.958	75.8654	262.938	76.19
7.67003	262.4	99.7157	262.39	99.8632	262.387	99.9318	262.574	80.0841	262.529	80.9248	262.493	81.7298	262.976	75.6655	262.96	75.8292	262.939	76.186
7.69006	262.4	99.7166	262.39	99.864	262.387	99.9322	262.574	80.0842	262.528	80.9399	262.492	81.7559	262.975	75.6793	262.962	75.8319	262.939	76.174
7.71009	262.399	99.7182	262.39	99.8647	262.387	99.9327	262.574	80.0924	262.529	80.9256	262.492	81.7533	262.976	75.6538	262.961	75.8838	262.939	76.163
7.73012	262.399	99.7193	262.39	99.8655	262.387	99.9331	262.573	80.1038	262.528	80.9341	262.491	81.7787	262.977	75.6299	262.958	75.912	262.938	76.154
7.75014	262.399	99.7206	262.39	99.8663	262.387	99.9336	262.573	80.11	262.527	80.9665	262.491	81.7654	262.978	75.6286	262.957	75.9096	262.937	76.144
7.77017	262.399	99.7223	262.39	99.8672	262.387	99.934	262.573	80.1148	262.527	80.973	262.492	81.7367	262.979	75.619	262.956	75.8913	262.937	76.141
7.7902	262.399	99.7235	262.39	99.8679	262.387	99.9345	262.572	80.1218	262.527	80.973	262.492	81.7362	262.979	75.6306	262.958	75.8579	262.938	76.147
7.81022	262.399	99.7248	262.39	99.8686	262.387	99.935	262.572	80.1312	262.526	80.9779	262.492	81.7353	262.978	75.6383	262.959	75.8357	262.938	76.153
7.83025	262.399	99.726	262.39	99.8693	262.387	99.9354	262.571	80.1349	262.526	80.9942	262.491	81.7612	262.976	75.6596	262.961	75.8145	262.939	76.156
7.85028	262.398	99.7273	262.39	99.87	262.387	99.9358	262.571	80.1448	262.525	81.0191	262.491	81.7723	262.976	75.6556	262.961	75.8322	262.939	76.155
7.87031	262.398	99.7289	262.39	99.8707	262.387	99.9363	262.571	80.1361	262.524	81.0344	262.491	81.7652	262.977	75.6343	262.959	75.8261	262.939	76.154
7.89033	262.398	99.7301	262.389	99.8715	262.387	99.9366	262.571	80.127	262.523	81.0717	262.491	81.7586	262.978	75.6291	262.959	75.7977	262.94	76.149
7.91036	262.398	99.7313	262.389	99.8722	262.387	99.937	262.572	80.1022	262.522	81.0848	262.491	81.7562	262.977	75.6323	262.96	75.7532	262.94	76.143
7.93039	262.398	99.7325	262.389	99.8729	262.387	99.9375	262.572	80.1027	262.522	81.0815	262.491	81.7736	262.977	75.6328	262.962	75.7219	262.942	76.138
7.95041	262.398	99.7336	262.389	99.8736	262.387	99.938	262.571	80.1069	262.523	81.065	262.49	81.7964	262.977	75.6274	262.965	75.7176	262.943	76.132
7.97044	262.398	99.7349	262.389	99.8743	262.387	99.9384	262.571	80.1176	262.524	81.0387	262.489	81.8309	262.978	75.6079	262.966	75.7239	262.943	76.125
7.99047	262.398	99.7362	262.389	99.8749	262.387	99.9389	262.57	80.1293	262.524	81.0288	262.487	81.868	262.979	75.5991	262.964	75.7646	262.942	76.12
8.01	262.397	99.7373	262.389	99.8757	262.387	99.9393	262.57	80.1411	262.524	81.0284	262.486	81.9207	262.979	75.5985	262.961	75.7985	262.942	76.121
8.02907	262.397	99.7383	262.389	99.8764	262.386	99.9397	262.569	80.1574	262.523	81.0344	262.486	81.9159	262.98	75.6096	262.959	75.7927	262.941	76.124
8.04814	262.397	99.7395	262.389	99.8771	262.386	99.94	262.569	80.1525	262.523	81.0422	262.486	81.9055	262.978	75.6304	262.961	75.7869	262.94	76.13
8.06722	262.397	99.7408	262.389	99.8777	262.386	99.9405	262.569	80.1559	262.522	81.0615	262.487	81.8828	262.978	75.6239	262.962	75.752	262.941	76.133
8.08629	262.397	99.742	262.389	99.8784	262.386	99.9409	262.569	80.1421	262.522	81.0785	262.487	81.8618	262.978	75.6268	262.962	75.7606	262.941	76.131
8.10536	262.397	99.7432	262.389	99.879	262.386	99.9413	262.569	80.1456	262.52	81.1227	262.488	81.8458	262.978	75.6156	262.962	75.8012	262.94	76.128
8.12444	262.397	99.7441	262.389	99.8798	262.386	99.9418	262.568	80.1492	262.52	81.1166	262.487	81.858	262.979	75.6004	262.959	75.8441	262.939	76.124
8.14351	262.397	99.7454	262.388	99.8805	262.386	99.9422	262.567	80.1722	262.52	81.1253	262.487	81.8616	262.979	75.6118	262.957	75.8841	262.938	76.119
8.16258	262.396	99.7463	262.388	99.8812	262.386	99.9426	262.567	80.1874	262.52	81.112	262.487	81.8646	262.98	75.6058	262.956	75.8843	262.937	76.117
8.18166	262.396	99.7474	262.388	99.8819	262.386	99.943	262.567	80.1855	262.521	81.0991	262.486	81.8867	262.98	75.5999	262.958	75.8397	262.938	76.122
8.20073	262.396	99.7485	262.388	99.8826	262.386	99.9435	262.567	80.1688	262.521	81.086	262.486	81.9041	262.98	75.6085	262.96	75.8269	262.938	76.125
8.2198	262.396	99.7496	262.388	99.8833	262.386	99.944	262.567	80.167	262.521	81.0773	262.485	81.9225	262.979	75.6222	262.959	75.8527	262.938	76.129
8.23888	262.396	99.7507	262.388	99.8839	262.386	99.9444	262.567	80.158	262.521	81.0758	262.485	81.9087	262.979	75.6304	262.959	75.866	262.938	76.135
8.25795	262.396	99.7516	262.388	99.8847	262.386	99.9448	262.567	80.153	262.521	81.0616	262.485	81.9085	262.978	75.6267	262.958	75.8843	262.937	76.136
8.27703	262.396	99.7527	262.388	99.8854	262.386	99.9452	262.567	80.1618	262.521	81.0752	262.485	81.9085	262.978	75.6253	262.956	75.8877	262.937	76.136
8.2961	262.396	99.7536	262.388	99.886	262.386	99.9455	262.567	80.1462	262.521	81.0789	262.485	81.9168	262.978	75.616	262.957	75.8525	262.938	76.13
8.31517	262.396	99.7551	262.388	99.8867	262.386	99.9459	262.566	80.162	262.52	81.0984	262.484	81.9332	262.977	75.62	262.96	75.8171	262.938	76.121
8.33425	262.395	99.7562	262.388	99.8873	262.386	99.9463	262.567	80.1525	262.518	81.1512	262.484	81.9373	262.978	75.6046	262.961	75.7984	262.939	76.113
8.35332	262.395	99.7574	262.388	99.888	262.386	99.9466	262.566	80.1551	262.517	81.1846	262.483	81.9697	262.979	75.5814	262.961	75.8033	262.94	76.107
8.37239	262.395	99.7585	262.388	99.8886	262.386	99.947	262.566	80.1705	262.517	81.1828	262.483	81.9655	262.979	75.5838	262.96	75.836	262.94	76.102
8.39147	262.395	99.7597	262.387	99.8893	262.386	99.9473	262.565	80.1882	262.517	81.1846	262.482	81.9873	262.98	75.586	262.961	75.8397	262.94	76.104
8.41054	262.395	99.7609	262.387	99.8899	262.386	99.9477	262.564	80.2111	262.517	81.1799	262.482	81.9856	262.98	75.5936	262.961	75.8374	262.94	76.114
8.42961	262.395	99.7618	262.387	99.8905	262.386	99.948	262.563	80.2305	262.517	81.1729	262.482	81.995	262.98	75.6141	262.96	75.8227	262.94	76.124
8.44869	262.395	99.7629	262.387	99.8911	262.385	99.9484	262.564	80.2163	262.516	81.1955	262.483	81.9633	262.979	75.6305	262.96	75.7921	262.94	76.132
8.46776	262.395	99.7638	262.387	99.8917	262.385	99.9487	262.564	80.2051	262.517	81.1789	262.483	81.9663	262.977	75.6376	262.96	75.7595	262.94	76.136
8.48683	262.394	99.7648	262.387	99.8923	262.385	99.9491	262.564	80.19	262.516	81.1952	262.482	81.989	262.977	75.6233	262.961	75.7507	262.941	76.135
8.50591	262.394	99.7658	262.387	99.893	262.385	99.9495	262.564	80.1937	262.516	81.2059	262.482	82.0006	262.977	75.6166	262.962	75.7477	262.941	76.128
8.52498	262.394	99.767	262.387	99.8937	262.385	99.9498	262.563	80.21	262.515	81.2148	262.481	82.0197	262.978	75.6053	262.964	75.7504	262.941	76.12
8.54405	262.394	99.768	262.387	99.8943	262.385	99.9501	262.562	80.2368	262.515	81.2299	262.481	82.0206	262.98	75.5955	262.962	75.796	262.941	76.12
8.56313	262.394	99.7693	262.387	99.8947	262.385	99.9505	262.561	80.2662	262.514	81.2358	262.48	82.0337	262.98	75.5988	262.961	75.8163	262.94	76.13
8.5822	262.394	99.7702	262.387	99.8953	262.385	99.9508	262.561	80.2826	262.514	81.2559	262.48	82.0429	262.979	75.6265	262.959	75.8105	262.94	76.143
8.60127	262.394	99.7711	262.387	99.8959	262.385	99.9512	262.56	80.2865	262.514	81.2368	262.481	82.0214	262.978	75.6621	262.959	75.7818	262.94	76.16
8.62035	262.394	99.7721	262.387	99.8966	262.385	99.9515	262.561	80.2727	262.515	81.2253	262.481	82.0024	262.977	75.6741	262.96	75.7761	262.94	76.178
8.63942	262.394	99.7732	262.387	99.8971	262.385	99.9519	262.56	80.2826	262.514	81.2246	262.482	81.988	262.976	75.6795	262.962	75.7626	262.94	76.184
8.6585	262.393	99.7742	262.387	99.8977	262.385	99.9522	262.56	80.2771	262.513	81.2582	262.481	82.0203	262.975	75.6873	262.961	75.7852	262.94	76.181
8.67757	262.393	99.7753	262.386	99.8983	262.385	99.9525	262.56	80.2816	262.512	81.2964	262.48	82.0362	262.976	75.6573	262.96	75.8237	262.94	76.174
8.69664	262.393	99.7762	262.386	99.8989	262.385	99.9528	262.56	80.2867	262.511	81.322	262.48	82.0266	262.976	75.6448	262.959	75.8317	262.939	76.166
8.71571	262.393	99.7771	262.386	99.8996	262.385	99.9532	262.56	80.2743	262.512	81.2986	262.481	82.0036	262.976	75.6418	262.958	75.8439	262.938	76.155
8.73479	262.393	99.778	262.386	99.9002	262.385	99.9535	262.56	80.2653	262.512	81.2881	262.482	81.9813	262.976	75.6405	262.958	75.8286	262.938	76.15
8.75386	262.393	99.7792	262.386	99.9008	262.385	99.9539	262.56	80.2736	262.512	81.2751	262.483	81.9449	262.977	75.6302	262.959	75.8227	262.938	76.148
8.77294	262.393	99.7802	262.386	99.9014	262.385	99.9542	262.559	80.2836	262.513	81.2654	262.483	81.9503	262.978	75.6313	262.96	75.7855	262.939	76.147
8.79201	262.393	99.7811	262.386	99.902	262.385	99.9545	262.559	80.2977	262.511	81.299	262.482	81.9779	262.978	75.6353	262.96	75.7877	262.94	76.148
8.81108	262.393	99.7821	262.386	99.9025	262.385	99.9548	262.558	80.2989	262.51	81.3393	262.482	81.9836	262.978	75.6394	262.961	75.7951	262.94	76.15
8.83016	262.392	99.7831	262.386	99.9031	262.385	99.9551	262.558	80.2954	262.509	81.3583	262.48	82.0147	262.978	75.644	262.961	75.7913	262.94	76.152
8.84923	262.392	99.7841	262.386	99.9036	262.385	99.9554	262.558	80.2976	262.509	81.3686	262.48	82.0403	262.978	75.6415	262.96	75.8009	262.94	76.153
8.8683	262.392	99.785	262.386	99.9041	262.385	99.9558	262.558	80.2979	262.509	81.3574	262.479	82.0479	262.978	75.6419	262.96	75.8306	262.94	76.154
8.88738	262.392	99.7858	262.386	99.9046	262.385	99.9561	262.558	80.2962	262.51	81.3361	262.479	82.0542	262.978	75.6387	262.96	75.8109	262.94	76.16
8.90645	262.392	99.7867	262.386	99.9052	262.385	99.9564	262.558	80.3019	262.509	81.3489	262.478	82.0809	262.978	75.6465	262.961	75.7926	262.94	76.164
8.92552	262.392	99.7878	262.386	99.9057	262.385	99.9567	262.558	80.2935	262.51	81.3332	262.477	82.1105	262.976	75.6707	262.961	75.7876	262.94	76.165
8.9446	262.392	99.7887	262.386	99.9062	262.385	99.9571	262.558	80.2879	262.509	81.3567	262.477	82.1089	262.976	75.6647	262.96	75.8149	262.94	76.164
8.96367	262.392	99.7895	262.386	99.9068	262.384	99.9574	262.557	80.3052	262.508	81.3865	262.478	82.0704	262.977	75.6437	262.96	75.7992	262.94	76.161
8.98274	262.392	99.7902	262.385	99.9073	262.384	99.9577	262.556	80.3281	262.507	81.4107	262.479	82.0478	262.977	75.6338	262.959	75.8093	262.94	76.154
9.00182	262.392	99.791	262.385	99.9079	262.384	99.958	262.556	80.3429	262.506	81.4388	262.48	82.0237	262.977	75.6318	262.96	75.7855	262.94	76.144
9.02089	262.392	99.7919	262.385	99.9085	262.384	99.9582	262.555	80.3498	262.506	81.4481	262.48	82.0283	262.978	75.6342	262.962	75.7728	262.94	76.136
9.03997	262.391	99.7928	262.385	99.909	262.384	99.9585	262.555	80.3442	262.506	81.4349	262.479	82.0403	262.979	75.6154	262.962	75.7926	262.94	76.133
9.05904	262.391	99.7936	262.385	99.9095	262.384	99.9588	262.555	80.3457	262.506	81.4284	262.477	82.0956	262.979	75.6047	262.961	75.8146	262.94	76.134
9.07811	262.391	99.7945	262.385	99.91	262.384	99.959	262.555	80.3387	262.507	81.4075	262.476	82.1331	262.978	75.6197	262.959	75.8176	262.94	76.137
9.09718	262.391	99.7953	262.385	99.9105	262.384	99.9593	262.555	80.3467	262.507	81.391	262.475	82.1632	262.976	75.6385	262.959	75.81	262.939	76.136
9.11626	262.391	99.7961	262.385	99.911	262.384	99.9596	262.554	80.365	262.507	81.3861	262.475	82.1708	262.976	75.6459	262.96	75.7723	262.94	76.131
9.13533	262.391	99.797	262.385	99.9115	262.384	99.9599	262.554	80.3838	262.507	81.3926	262.475	82.1687	262.978	75.6093	262.961	75.7596	262.941	76.122
9.15441	262.391	99.7979	262.385	99.912	262.384	99.9602	262.553	80.4051	262.507	81.4056	262.476	82.1329	262.979	75.5809	262.963	75.7473	262.941	76.112
9.17348	262.391	99.7988	262.385	99.9126	262.384	99.9605	262.552	80.4269	262.506	81.416	262.477	82.0982	262.98	75.5775	262.963	75.7654	262.941	76.104
9.19255	262.391	99.7998	262.385	99.9131	262.384	99.9608	262.552	80.4332	262.505	81.4475	262.477	82.1034	262.981	75.5849	262.961	75.7835	262.94	76.105
9.21163	262.391	99.8008	262.385	99.9135	262.384	99.9611	262.552	80.427	262.505	81.4465	262.477	82.1122	262.98	75.6103	262.958	75.8284	262.939	76.112
9.2307	262.39	99.8016	262.385	99.914	262.384	99.9614	262.552	80.427	262.505	81.4431	262.476	82.1214	262.979	75.6111	262.957	75.8271	262.939	76.119
9.24977	262.39	99.8026	262.385	99.9145	262.384	99.9617	262.551	80.441	262.507	81.3967	262.475	82.1526	262.979	75.6175	262.959	75.7881	262.939	76.122
9.26885	262.39	99.8035	262.385	99.9149	262.384	99.9619	262.551	80.4537	262.507	81.3739	262.474	82.1913	262.979	75.6118	262.961	75.7646	262.939	76.121
9.28792	262.39	99.8044	262.385	99.9154	262.384	99.9622	262.55	80.4717	262.507	81.3772	262.473	82.2075	262.979	75.6011	262.962	75.7562	262.94	76.119
9.30699	262.39	99.8053	262.385	99.9159	262.384	99.9625	262.549	80.4807	262.507	81.3912	262.473	82.2058	262.98	75.6037	262.961	75.7935	262.94	76.116
9.32607	262.39	99.806	262.384	99.9164	262.384	99.9628	262.549	80.4912	262.505	81.4305	262.474	82.1983	262.979	75.5998	262.96	75.8047	262.94	76.114
9.34514	262.39	99.8067	262.384	99.9169	262.384	99.963	262.548	80.5031	262.504	81.465	262.474	82.1817	262.978	75.6045	262.96	75.7997	262.939	76.113
9.36421	262.39	99.8075	262.384	99.9174	262.384	99.9633	262.548	80.5155	262.503	81.4856	262.474	82.1861	262.978	75.6034	262.96	75.7908	262.939	76.114
9.38329	262.39	99.8083	262.384	99.918	262.384	99.9636	262.548	80.4972	262.504	81.4757	262.473	82.2289	262.979	75.5949	262.96	75.7909	262.94	76.116
9.40236	262.39	99.8093	262.384	99.9184	262.384	99.9639	262.548	80.5202	262.504	81.4695	262.47	82.2972	262.98	75.6056	262.961	75.7719	262.94	76.125
9.42143	262.389	99.8103	262.384	99.9189	262.384	99.9642	262.548	80.5156	262.504	81.4538	262.469	82.3422	262.98	75.6131	262.961	75.7756	262.94	76.138
9.44051	262.389	99.8112	262.384	99.9193	262.384	99.9645	262.547	80.5337	262.504	81.4482	262.469	82.3424	262.979	75.6492	262.961	75.7901	262.94	76.154
9.45958	262.389	99.8121	262.384	99.9198	262.384	99.9647	262.547	80.5161	262.504	81.4751	262.469	82.3487	262.978	75.6683	262.961	75.8071	262.94	76.169
9.47865	262.389	99.8129	262.384	99.9202	262.384	99.965	262.547	80.518	262.503	81.4997	262.469	82.3342	262.976	75.6752	262.96	75.8061	262.94	76.178
9.49773	262.389	99.8137	262.384	99.9207	262.384	99.9652	262.547	80.5234	262.503	81.4981	262.47	82.2957	262.975	75.6811	262.959	75.8282	262.939	76.174
9.5168	262.389	99.8145	262.384	99.9211	262.384	99.9655	262.547	80.5255	262.502	81.5117	262.469	82.3242	262.977	75.6581	262.96	75.8031	262.939	76.164
9.53588	262.389	99.8153	262.384	99.9215	262.384	99.9657	262.546	80.5413	262.502	81.5017	262.469	82.3197	262.977	75.6295	262.96	75.7819	262.94	76.155
9.55495	262.389	99.8161	262.384	99.9219	262.384	99.966	262.546	80.5391	262.502	81.5029	262.469	82.3207	262.977	75.6184	262.96	75.763	262.94	76.147
9.57402	262.389	99.8168	262.384	99.9224	262.384	99.9662	262.546	80.5342	262.502	81.5031	262.469	82.3172	262.976	75.6304	262.961	75.7413	262.941	76.143
9.5931	262.389	99.8175	262.384	99.9228	262.383	99.9664	262.547	80.5208	262.502	81.5026	262.47	82.3044	262.977	75.6371	262.962	75.7586	262.941	76.147
9.61217	262.389	99.8183	262.384	99.9233	262.383	99.9667	262.547	80.5109	262.502	81.5005	262.47	82.2946	262.978	75.6414	262.963	75.7603	262.941	76.155
9.63124	262.389	99.8189	262.384	99.9238	262.383	99.9669	262.546	80.5173	262.502	81.4949	262.469	82.3229	262.978	75.646	262.962	75.7868	262.94	76.164
9.65032	262.388	99.8196	262.384	99.9241	262.383	99.9671	262.547	80.5062	262.502	81.4935	262.468	82.3506	262.977	75.6603	262.96	75.8078	262.94	76.175
9.66939	262.388	99.8203	262.384	99.9246	262.383	99.9673	262.547	80.507	262.502	81.5018	262.467	82.385	262.977	75.6764	262.958	75.8096	262.939	76.182
9.68846	262.388	99.8211	262.384	99.925	262.383	99.9675	262.547	80.5081	262.501	81.5212	262.467	82.3978	262.976	75.6911	262.959	75.7916	262.94	76.191
9.70754	262.388	99.8219	262.383	99.9254	262.383	99.9678	262.546	80.5183	262.501	81.5385	262.466	82.4021	262.977	75.678	262.962	75.765	262.94	76.199
9.72661	262.388	99.8227	262.383	99.9259	262.383	99.968	262.545	80.5344	262.5	81.5556	262.467	82.3925	262.976	75.6896	262.963	75.7756	262.939	76.2
9.74568	262.388	99.8236	262.383	99.9262	262.383	99.9683	262.545	80.5413	262.501	81.5154	262.467	82.3802	262.974	75.7011	262.959	75.8338	262.939	76.192
9.76476	262.388	99.8244	262.383	99.9266	262.383	99.9685	262.545	80.5375	262.502	81.4918	262.467	82.3889	262.974	75.6802	262.957	75.8486	262.938	76.181
9.78383	262.388	99.8252	262.383	99.9271	262.383	99.9688	262.545	80.5427	262.502	81.4811	262.466	82.4085	262.976	75.6522	262.957	75.8355	262.938	76.165
9.8029	262.388	99.8258	262.383	99.9274	262.383	99.969	262.544	80.5528	262.502	81.4984	262.465	82.4334	262.978	75.6233	262.958	75.8075	262.938	76.15
9.82198	262.388	99.8265	262.383	99.9278	262.383	99.9692	262.545	80.5488	262.501	81.5362	262.465	82.4437	262.979	75.6088	262.961	75.7802	262.938	76.141
9.84105	262.388	99.8273	262.383	99.9283	262.383	99.9694	262.544	80.5546	262.499	81.5755	262.465	82.4516	262.978	75.6284	262.961	75.7967	262.939	76.138
9.86013	262.388	99.828	262.383	99.9287	262.383	99.9696	262.544	80.5678	262.499	81.5793	262.465	82.4329	262.978	75.6307	262.958	75.8422	262.939	76.143
9.8792	262.387	99.8288	262.383	99.9292	262.383	99.9698	262.543	80.5778	262.499	81.5806	262.465	82.444	262.978	75.638	262.958	75.8535	262.938	76.151
9.89827	262.387	99.8297	262.383	99.9296	262.383	99.97	262.543	80.5828	262.5	81.561	262.465	82.451	262.978	75.6519	262.958	75.8496	262.938	76.151
9.91734	262.387	99.8304	262.383	99.93	262.383	99.9702	262.543	80.5753	262.5	81.5469	262.465	82.4316	262.978	75.6453	262.959	75.8365	262.938	76.148
9.93642	262.387	99.8312	262.383	99.9303	262.383	99.9704	262.543	80.5778	262.501	81.5209	262.466	82.4216	262.979	75.6273	262.959	75.8332	262.938	76.148
9.95549	262.387	99.8319	262.383	99.9307	262.383	99.9706	262.543	80.5882	262.501	81.5145	262.465	82.4275	262.979	75.6203	262.958	75.8409	262.937	76.146
9.97457	262.387	99.8325	262.383	99.9311	262.383	99.9708	262.542	80.6039	262.501	81.5172	262.464	82.4589	262.977	75.6376	262.958	75.8577	262.937	76.142
9.99364	262.387	99.8332	262.383	99.9316	262.383	99.9711	262.541	80.6188	262.5	81.5297	262.463	82.5075	262.977	75.638	262.957	75.8457	262.937	76.14
10.0127	262.387	99.8339	262.383	99.932	262.383	99.9713	262.541	80.6175	262.5	81.5353	262.462	82.525	262.978	75.6273	262.958	75.8525	262.938	76.141
10.0318	262.387	99.8347	262.383	99.9323	262.383	99.9715	262.542	80.5944	262.499	81.5787	262.462	82.5187	262.979	75.6192	262.96	75.8527	262.938	76.144
10.0509	262.387	99.8354	262.383	99.9327	262.383	99.9717	262.543	80.5772	262.497	81.6285	262.463	82.5018	262.98	75.6255	262.96	75.881	262.937	76.154
10.0699	262.387	99.8362	262.383	99.933	262.383	99.9719	262.543	80.5506	262.496	81.6575	262.464	82.4553	262.978	75.6521	262.957	75.9189	262.936	76.166
10.089	262.387	99.837	262.383	99.9334	262.383	99.9721	262.543	80.5458	262.496	81.6496	262.464	82.4722	262.976	75.6851	262.955	75.9491	262.936	76.172
10.1081	262.386	99.8377	262.383	99.9338	262.383	99.9723	262.543	80.5627	262.496	81.6616	262.463	82.4983	262.975	75.6872	262.954	75.9215	262.936	76.174
10.1272	262.386	99.8383	262.382	99.9342	262.383	99.9725	262.541	80.6002	262.497	81.633	262.462	82.5347	262.977	75.6524	262.956	75.8682	262.936	76.171
10.1462	262.386	99.839	262.382	99.9346	262.383	99.9727	262.541	80.6228	262.497	81.6296	262.461	82.5628	262.977	75.6341	262.959	75.8479	262.937	76.163
10.1653	262.386	99.8399	262.382	99.935	262.383	99.9729	262.54	80.6491	262.497	81.6144	262.461	82.5415	262.978	75.6369	262.96	75.8413	262.937	76.15
10.1844	262.386	99.8406	262.382	99.9354	262.383	99.9732	262.539	80.6686	262.497	81.6231	262.462	82.5339	262.977	75.6429	262.958	75.8754	262.938	76.142
10.2035	262.386	99.8413	262.382	99.9358	262.383	99.9734	262.538	80.6885	262.497	81.6257	262.461	82.5432	262.977	75.6255	262.956	75.9048	262.937	76.137
10.2225	262.386	99.8419	262.382	99.9362	262.383	99.9736	262.539	80.675	262.495	81.6652	262.461	82.564	262.978	75.612	262.957	75.894	262.937	76.13
10.2416	262.386	99.8426	262.382	99.9365	262.383	99.9738	262.539	80.6655	262.495	81.6768	262.46	82.5709	262.979	75.6073	262.958	75.8807	262.937	76.128
10.2607	262.386	99.8433	262.382	99.9368	262.383	99.974	262.539	80.6459	262.495	81.6731	262.46	82.5709	262.98	75.605	262.958	75.8618	262.938	76.132
10.2797	262.386	99.844	262.382	99.9372	262.383	99.9742	262.539	80.6509	262.495	81.6863	262.46	82.5846	262.979	75.6286	262.959	75.8404	262.938	76.14
10.2988	262.386	99.8447	262.382	99.9375	262.383	99.9743	262.539	80.6583	262.494	81.6974	262.46	82.5713	262.978	75.6477	262.959	75.8637	262.938	76.149
10.3179	262.386	99.8454	262.382	99.9379	262.383	99.9745	262.538	80.6736	262.494	81.7054	262.459	82.607	262.977	75.6538	262.959	75.8588	262.938	76.156
10.337	262.385	99.8461	262.382	99.9382	262.383	99.9747	262.538	80.6801	262.493	81.7439	262.458	82.6339	262.977	75.6511	262.959	75.8639	262.938	76.153
10.356	262.385	99.8468	262.382	99.9386	262.383	99.9749	262.538	80.6711	262.492	81.7723	262.458	82.6466	262.977	75.6404	262.959	75.8631	262.938	76.143
10.3751	262.385	99.8475	262.382	99.9389	262.383	99.975	262.538	80.661	262.491	81.7906	262.457	82.6586	262.978	75.6116	262.959	75.8462	262.938	76.131
10.3942	262.385	99.8481	262.382	99.9393	262.382	99.9752	262.538	80.6622	262.491	81.8025	262.457	82.6685	262.979	75.6003	262.959	75.8624	262.938	76.124
10.4133	262.385	99.8486	262.382	99.9396	262.382	99.9754	262.538	80.6832	262.491	81.802	262.457	82.658	262.979	75.594	262.96	75.8699	262.938	76.117
10.4323	262.385	99.8493	262.382	99.9399	262.382	99.9756	262.537	80.7032	262.491	81.7784	262.458	82.6335	262.979	75.6158	262.958	75.884	262.937	76.115
10.4514	262.385	99.8498	262.382	99.9402	262.382	99.9758	262.536	80.7259	262.491	81.7918	262.458	82.6326	262.979	75.605	262.957	75.9057	262.937	76.117
10.4705	262.385	99.8504	262.382	99.9406	262.382	99.9759	262.536	80.7358	262.49	81.8173	262.458	82.63	262.98	75.6023	262.956	75.8964	262.937	76.124
10.4895	262.385	99.8511	262.382	99.9409	262.382	99.9761	262.535	80.7445	262.489	81.8329	262.458	82.6392	262.979	75.6092	262.958	75.8851	262.937	76.123
10.5086	262.385	99.8517	262.382	99.9412	262.382	99.9763	262.536	80.7316	262.49	81.8238	262.457	82.6737	262.978	75.6259	262.96	75.8662	262.937	76.124
10.5277	262.385	99.8524	262.382	99.9416	262.382	99.9765	262.536	80.7266	262.49	81.8145	262.456	82.7013	262.979	75.6147	262.959	75.8702	262.937	76.127
10.5468	262.385	99.853	262.382	99.942	262.382	99.9767	262.535	80.7393	262.49	81.8151	262.455	82.728	262.978	75.6108	262.958	75.8833	262.937	76.126
10.5658	262.385	99.8537	262.382	99.9423	262.382	99.9768	262.535	80.744	262.49	81.8161	262.455	82.7138	262.978	75.6144	262.956	75.8978	262.937	76.121
10.5849	262.385	99.8543	262.382	99.9427	262.382	99.977	262.535	80.7438	262.489	81.8401	262.456	82.7053	262.978	75.6024	262.957	75.8608	262.938	76.118
10.604	262.385	99.8549	262.382	99.9429	262.382	99.9772	262.535	80.7363	262.489	81.847	262.455	82.7159	262.979	75.6038	262.96	75.8418	262.938	76.119
10.6231	262.384	99.8556	262.381	99.9433	262.382	99.9774	262.536	80.7186	262.488	81.8635	262.456	82.7009	262.98	75.6014	262.961	75.8417	262.938	76.122
10.6421	262.384	99.8563	262.381	99.9436	262.382	99.9776	262.535	80.7248	262.488	81.8796	262.456	82.6868	262.978	75.6152	262.958	75.8952	262.938	76.126
10.6612	262.384	99.857	262.381	99.944	262.382	99.9777	262.535	80.7269	262.487	81.8867	262.455	82.7175	262.977	75.6302	262.957	75.8903	262.938	76.125
10.6803	262.384	99.8576	262.381	99.9442	262.382	99.9779	262.534	80.7608	262.487	81.9078	262.454	82.7479	262.977	75.6208	262.957	75.8887	262.937	76.122
10.6994	262.384	99.8582	262.381	99.9446	262.382	99.978	262.533	80.7787	262.486	81.9307	262.453	82.7983	262.978	75.597	262.958	75.8259	262.938	76.115
10.7184	262.384	99.8587	262.381	99.9449	262.382	99.9782	262.533	80.787	262.486	81.9282	262.451	82.8317	262.979	75.5854	262.959	75.8275	262.938	76.11
10.7375	262.384	99.8592	262.381	99.9452	262.382	99.9783	262.533	80.7984	262.486	81.9387	262.451	82.8429	262.98	75.5825	262.96	75.8081	262.939	76.111
10.7566	262.384	99.8598	262.381	99.9455	262.382	99.9785	262.532	80.8051	262.485	81.9577	262.452	82.8162	262.98	75.6038	262.961	75.8198	262.94	76.121
10.7757	262.384	99.8604	262.381	99.9459	262.382	99.9786	262.532	80.8243	262.485	81.9546	262.453	82.7758	262.979	75.6261	262.961	75.8454	262.939	76.135
10.7947	262.384	99.861	262.381	99.9462	262.382	99.9788	262.532	80.8213	262.485	81.9393	262.454	82.7543	262.978	75.6471	262.961	75.8646	262.939	76.15
10.8138	262.384	99.8616	262.381	99.9465	262.382	99.9789	262.531	80.8349	262.486	81.9368	262.453	82.7912	262.977	75.6581	262.958	75.8726	262.938	76.159
10.8329	262.384	99.8622	262.381	99.9468	262.382	99.9791	262.531	80.8353	262.486	81.9266	262.452	82.8173	262.976	75.657	262.956	75.8906	262.938	76.161
10.852	262.384	99.8628	262.381	99.9471	262.382	99.9792	262.531	80.8257	262.486	81.9086	262.451	82.8511	262.976	75.6486	262.957	75.8687	262.938	76.156
10.871	262.384	99.8634	262.381	99.9474	262.382	99.9794	262.531	80.831	262.487	81.8935	262.451	82.8361	262.976	75.6362	262.96	75.8418	262.938	76.148
10.8901	262.384	99.8639	262.381	99.9476	262.382	99.9795	262.53	80.8512	262.487	81.9028	262.452	82.8257	262.977	75.6202	262.96	75.8235	262.939	76.141
10.9092	262.383	99.8646	262.381	99.9479	262.382	99.9797	262.529	80.8866	262.486	81.9149	262.452	82.8246	262.977	75.6166	262.961	75.8329	262.939	76.137
10.9282	262.383	99.8651	262.381	99.9482	262.382	99.9798	262.529	80.8987	262.486	81.9232	262.452	82.8062	262.978	75.6237	262.959	75.8542	262.938	76.134
10.9473	262.383	99.8657	262.381	99.9485	262.382	99.98	262.529	80.8889	262.485	81.9533	262.452	82.7985	262.977	75.6302	262.958	75.8724	262.938	76.134
10.9664	262.383	99.8661	262.381	99.9488	262.382	99.9801	262.529	80.8909	262.485	81.9403	262.453	82.7877	262.977	75.6215	262.958	75.8885	262.938	76.135
10.9855	262.383	99.8667	262.381	99.9491	262.382	99.9803	262.529	80.8847	262.486	81.9234	262.452	82.8137	262.978	75.6163	262.959	75.859	262.938	76.136
11.0045	262.383	99.8672	262.381	99.9494	262.382	99.9804	262.529	80.8931	262.486	81.9176	262.452	82.8104	262.978	75.6256	262.958	75.8492	262.938	76.135
11.0236	262.383	99.8678	262.381	99.9497	262.382	99.9806	262.529	80.8857	262.486	81.9086	262.451	82.8504	262.979	75.6259	262.958	75.8341	262.938	76.137
11.0427	262.383	99.8685	262.381	99.95	262.382	99.9807	262.528	80.8954	262.486	81.8991	262.45	82.8808	262.979	75.6264	262.958	75.8041	262.939	76.145
11.0617	262.383	99.869	262.381	99.9503	262.382	99.9808	262.528	80.8955	262.486	81.9045	262.45	82.8818	262.978	75.6326	262.96	75.8026	262.94	76.148
11.0808	262.383	99.8696	262.381	99.9506	262.382	99.9809	262.529	80.8819	262.486	81.9225	262.449	82.8975	262.977	75.6539	262.962	75.7981	262.94	76.15
11.0999	262.383	99.8702	262.381	99.9508	262.382	99.981	262.529	80.8718	262.486	81.9123	262.449	82.8965	262.977	75.6431	262.962	75.824	262.94	76.15
11.119	262.383	99.8708	262.381	99.951	262.382	99.9812	262.529	80.8609	262.486	81.9031	262.449	82.9063	262.977	75.6354	262.96	75.8689	262.939	76.144
11.138	262.383	99.8713	262.381	99.9513	262.382	99.9813	262.529	80.8733	262.486	81.8985	262.45	82.8801	262.977	75.6233	262.956	75.908	262.938	76.136
11.1571	262.383	99.8719	262.381	99.9516	262.382	99.9814	262.528	80.9037	262.486	81.9001	262.449	82.886	262.978	75.6071	262.956	75.8971	262.937	76.128
11.1762	262.383	99.8723	262.381	99.9519	262.382	99.9815	262.527	80.9213	262.486	81.8921	262.45	82.8792	262.977	75.613	262.957	75.8746	262.937	76.121
11.1953	262.383	99.8729	262.38	99.9521	262.382	99.9817	262.526	80.9452	262.485	81.9333	262.45	82.8653	262.977	75.6034	262.959	75.8428	262.937	76.116
11.2143	262.382	99.8734	262.38	99.9524	262.382	99.9818	262.525	80.9673	262.484	81.9507	262.45	82.8782	262.977	75.6	262.959	75.8467	262.938	76.111
11.2334	262.382	99.8739	262.38	99.9526	262.382	99.9819	262.525	80.9652	262.484	81.97	262.449	82.9032	262.978	75.5991	262.958	75.874	262.937	76.104
11.2525	262.382	99.8744	262.38	99.9529	262.382	99.9821	262.526	80.9417	262.484	81.9716	262.448	82.9233	262.979	75.579	262.957	75.8845	262.937	76.103
11.2716	262.382	99.875	262.38	99.9532	262.382	99.9822	262.526	80.9331	262.483	81.9801	262.447	82.9454	262.981	75.5794	262.957	75.8885	262.937	76.107
11.2906	262.382	99.8756	262.38	99.9535	262.382	99.9823	262.527	80.9233	262.484	81.9586	262.447	82.9463	262.98	75.5972	262.959	75.8469	262.938	76.117
11.3097	262.382	99.876	262.38	99.9537	262.382	99.9824	262.527	80.9225	262.484	81.964	262.448	82.9244	262.979	75.6213	262.959	75.8261	262.938	76.129
11.3288	262.382	99.8766	262.38	99.954	262.382	99.9825	262.526	80.9297	262.483	81.9832	262.449	82.9074	262.977	75.6498	262.96	75.8505	262.938	76.137
11.3479	262.382	99.8771	262.38	99.9542	262.382	99.9827	262.526	80.9462	262.483	81.9897	262.448	82.923	262.977	75.6393	262.959	75.8642	262.938	76.137
11.3669	262.382	99.8776	262.38	99.9545	262.382	99.9828	262.526	80.9507	262.483	81.9937	262.446	82.986	262.978	75.6158	262.958	75.9105	262.937	76.134
11.386	262.382	99.8781	262.38	99.9547	262.382	99.9829	262.525	80.9524	262.483	81.998	262.445	83.0303	262.978	75.6012	262.957	75.923	262.937	76.125
11.4051	262.382	99.8786	262.38	99.955	262.382	99.983	262.525	80.9604	262.483	81.9888	262.445	83.015	262.979	75.6024	262.956	75.938	262.937	76.116
11.4241	262.382	99.8792	262.38	99.9552	262.382	99.9831	262.525	80.96	262.483	81.9933	262.445	83.0077	262.979	75.6052	262.957	75.938	262.936	76.113
11.4432	262.382	99.8797	262.38	99.9555	262.382	99.9832	262.525	80.9571	262.482	82.0068	262.445	83.0103	262.98	75.5981	262.958	75.9325	262.936	76.111
11.4623	262.382	99.8802	262.38	99.9557	262.382	99.9834	262.525	80.9593	262.482	82.0297	262.445	83.0097	262.979	75.5998	262.956	75.93	262.935	76.108
11.4814	262.382	99.8807	262.38	99.956	262.382	99.9835	262.525	80.9621	262.481	82.0436	262.445	83.0051	262.978	75.5923	262.954	75.9303	262.935	76.1
11.5004	262.382	99.8812	262.38	99.9562	262.382	99.9836	262.525	80.9575	262.481	82.0336	262.446	82.9991	262.978	75.5855	262.955	75.9192	262.935	76.092
11.5195	262.382	99.8817	262.38	99.9564	262.382	99.9837	262.525	80.9505	262.481	82.0561	262.447	82.9634	262.979	75.565	262.957	75.8787	262.936	76.08
11.5386	262.381	99.8822	262.38	99.9567	262.382	99.9838	262.525	80.9483	262.479	82.0954	262.446	82.9858	262.98	75.5568	262.958	75.8667	262.937	76.072
11.5577	262.381	99.8828	262.38	99.9569	262.382	99.9839	262.525	80.9504	262.479	82.1167	262.445	83.0138	262.981	75.5383	262.959	75.8605	262.937	76.068
11.5767	262.381	99.8833	262.38	99.9572	262.382	99.984	262.524	80.9712	262.478	82.1216	262.445	83.0277	262.981	75.5544	262.958	75.8544	262.938	76.072
11.5958	262.381	99.8838	262.38	99.9575	262.382	99.9841	262.524	80.9875	262.479	82.093	262.443	83.0736	262.98	75.5668	262.958	75.8558	262.938	76.08
11.6149	262.381	99.8843	262.38	99.9577	262.381	99.9843	262.523	80.994	262.479	82.0902	262.444	83.0616	262.98	75.5839	262.959	75.8363	262.939	76.096
11.634	262.381	99.8848	262.38	99.9579	262.381	99.9844	262.524	80.9829	262.48	82.0735	262.443	83.074	262.979	75.5963	262.96	75.8185	262.939	76.106
11.653	262.381	99.8853	262.38	99.9581	262.381	99.9845	262.524	80.9734	262.48	82.0665	262.444	83.048	262.978	75.6171	262.961	75.8234	262.94	76.114
11.6721	262.381	99.8859	262.38	99.9584	262.381	99.9846	262.523	80.9889	262.48	82.0754	262.443	83.0688	262.978	75.6065	262.96	75.8218	262.94	76.12
11.6912	262.381	99.8863	262.38	99.9586	262.381	99.9847	262.523	80.9942	262.48	82.0792	262.443	83.0631	262.978	75.6055	262.96	75.8468	262.94	76.12
11.7103	262.381	99.8868	262.38	99.9588	262.381	99.9848	262.523	80.9913	262.48	82.0851	262.443	83.0604	262.977	75.6138	262.96	75.8116	262.94	76.113
11.7293	262.381	99.8874	262.38	99.959	262.381	99.9849	262.523	81.0073	262.479	82.0964	262.443	83.0632	262.978	75.596	262.962	75.7939	262.94	76.108
11.7484	262.381	99.8879	262.38	99.9593	262.381	99.985	262.523	81.0005	262.48	82.0841	262.442	83.0998	262.978	75.5862	262.962	75.7805	262.94	76.104
11.7675	262.381	99.8884	262.38	99.9595	262.381	99.9851	262.523	81.0112	262.48	82.0824	262.442	83.1078	262.978	75.5803	262.961	75.8103	262.941	76.098
11.7866	262.381	99.8889	262.38	99.9598	262.381	99.9852	262.522	81.0245	262.479	82.0884	262.442	83.1163	262.979	75.5832	262.96	75.7915	262.941	76.1
11.8056	262.381	99.8894	262.38	99.96	262.381	99.9853	262.522	81.0299	262.48	82.0809	262.441	83.1228	262.98	75.5861	262.961	75.779	262.941	76.104
11.8247	262.381	99.8898	262.38	99.9603	262.381	99.9854	262.522	81.0268	262.48	82.0784	262.441	83.1237	262.978	75.6031	262.963	75.765	262.941	76.108
11.8438	262.381	99.8903	262.38	99.9605	262.381	99.9855	262.522	81.0325	262.479	82.0819	262.442	83.1134	262.978	75.6074	262.963	75.7533	262.941	76.113
11.8628	262.381	99.8907	262.38	99.9608	262.381	99.9856	262.521	81.0547	262.479	82.0914	262.442	83.1171	262.978	75.6021	262.962	75.7708	262.941	76.116
11.8819	262.38	99.8911	262.38	99.961	262.381	99.9858	262.52	81.0799	262.478	82.1127	262.441	83.1362	262.978	75.6078	262.961	75.8092	262.941	76.113
11.901	262.38	99.8916	262.379	99.9612	262.381	99.9859	262.52	81.0923	262.478	82.1275	262.441	83.1417	262.978	75.5986	262.962	75.8167	262.941	76.107
11.9201	262.38	99.8922	262.379	99.9614	262.381	99.986	262.519	81.0937	262.478	82.1217	262.44	83.1508	262.979	75.5874	262.962	75.8338	262.94	76.106
11.9391	262.38	99.8926	262.379	99.9617	262.381	99.9861	262.519	81.0951	262.479	82.1062	262.44	83.1567	262.979	75.5794	262.959	75.8634	262.939	76.105
11.9582	262.38	99.8931	262.379	99.9619	262.381	99.9862	262.519	81.0998	262.478	82.1153	262.44	83.1538	262.979	75.5992	262.957	75.8758	262.938	76.105
11.9773	262.38	99.8936	262.379	99.9621	262.381	99.9862	262.519	81.0987	262.478	82.1217	262.441	83.1426	262.978	75.5997	262.957	75.8561	262.937	76.105
11.9964	262.38	99.8941	262.379	99.9623	262.381	99.9863	262.519	81.1061	262.477	82.1546	262.44	83.1587	262.978	75.5977	262.957	75.8347	262.938	76.107
12.0154	262.38	99.8946	262.379	99.9625	262.381	99.9864	262.519	81.1125	262.475	82.2167	262.44	83.1552	262.978	75.5896	262.959	75.8022	262.939	76.103
12.0345	262.38	99.895	262.379	99.9628	262.381	99.9865	262.518	81.121	262.474	82.2429	262.439	83.191	262.978	75.5912	262.962	75.8034	262.939	76.097
12.0536	262.38	99.8955	262.379	99.963	262.381	99.9866	262.518	81.1268	262.474	82.2533	262.44	83.1554	262.979	75.5748	262.962	75.8445	262.939	76.091
12.0726	262.38	99.8959	262.379	99.9632	262.381	99.9867	262.518	81.12	262.474	82.2414	262.44	83.1592	262.978	75.5713	262.959	75.917	262.938	76.085
12.0917	262.38	99.8964	262.379	99.9634	262.381	99.9868	262.518	81.1192	262.475	82.201	262.44	83.168	262.979	75.5663	262.955	75.9656	262.936	76.079
12.1108	262.38	99.8968	262.379	99.9636	262.381	99.9869	262.518	81.1328	262.476	82.1774	262.439	83.1914	262.979	75.5604	262.954	75.9515	262.935	76.078
12.1299	262.38	99.8973	262.379	99.9638	262.381	99.987	262.518	81.1346	262.476	82.1777	262.439	83.2043	262.98	75.5631	262.955	75.9372	262.935	76.076
12.1489	262.38	99.8978	262.379	99.964	262.381	99.9871	262.517	81.1444	262.476	82.1878	262.438	83.2147	262.98	75.5684	262.957	75.8924	262.936	76.076
12.168	262.38	99.8982	262.379	99.9642	262.381	99.9872	262.517	81.1477	262.475	82.2179	262.439	83.1854	262.98	75.5642	262.958	75.8756	262.936	76.077
12.1871	262.38	99.8986	262.379	99.9644	262.381	99.9873	262.517	81.1536	262.475	82.2228	262.438	83.2168	262.979	75.5637	262.957	75.8933	262.936	76.076
12.2062	262.38	99.899	262.379	99.9647	262.381	99.9874	262.517	81.1584	262.475	82.2193	262.438	83.2145	262.978	75.5643	262.956	75.9112	262.936	76.073
12.2252	262.38	99.8994	262.379	99.9649	262.381	99.9875	262.517	81.145	262.474	82.2398	262.438	83.234	262.979	75.5596	262.955	75.8949	262.936	76.067
12.2443	262.38	99.8998	262.379	99.9651	262.381	99.9876	262.517	81.1577	262.473	82.2763	262.436	83.2833	262.979	75.5516	262.957	75.859	262.937	76.062
12.2634	262.379	99.9002	262.379	99.9653	262.381	99.9876	262.517	81.1586	262.471	82.316	262.435	83.3083	262.981	75.5363	262.959	75.8394	262.937	76.059
12.2825	262.379	99.9006	262.379	99.9655	262.381	99.9877	262.516	81.1812	262.471	82.3161	262.435	83.3301	262.981	75.5406	262.959	75.8588	262.937	76.06
12.3015	262.379	99.901	262.379	99.9657	262.381	99.9878	262.515	81.1952	262.472	82.3056	262.435	83.3171	262.98	75.5498	262.958	75.8933	262.937	76.062
12.3206	262.379	99.9014	262.379	99.9659	262.381	99.9879	262.515	81.2172	262.472	82.3064	262.434	83.3455	262.98	75.5619	262.955	75.9196	262.936	76.066
12.3397	262.379	99.9019	262.379	99.9661	262.381	99.988	262.515	81.2067	262.471	82.3202	262.435	83.3279	262.979	75.5601	262.954	75.9223	262.936	76.067
12.3588	262.379	99.9023	262.379	99.9663	262.381	99.9881	262.515	81.1993	262.471	82.3126	262.434	83.3418	262.979	75.5557	262.957	75.8857	262.936	76.066
12.3778	262.379	99.9027	262.379	99.9665	262.381	99.9882	262.515	81.2026	262.472	82.3082	262.435	83.3145	262.98	75.5482	262.96	75.8516	262.937	76.063
12.3969	262.379	99.9032	262.379	99.9667	262.381	99.9882	262.515	81.2064	262.472	82.3024	262.435	83.3292	262.981	75.5458	262.959	75.8814	262.937	76.062
12.416	262.379	99.9036	262.379	99.9669	262.381	99.9883	262.514	81.2169	262.472	82.3064	262.434	83.3474	262.981	75.5451	262.956	75.896	262.937	76.065
12.4351	262.379	99.904	262.379	99.9671	262.381	99.9884	262.514	81.2279	262.471	82.3219	262.432	83.3967	262.98	75.5567	262.955	75.8934	262.937	76.073
12.4541	262.379	99.9044	262.379	99.9672	262.381	99.9885	262.514	81.2254	262.471	82.3238	262.432	83.4167	262.979	75.5695	262.957	75.8682	262.937	76.084
12.4732	262.379	99.9048	262.379	99.9674	262.381	99.9886	262.514	81.2245	262.471	82.3138	262.431	83.4419	262.978	75.5904	262.96	75.8406	262.938	76.094
12.4923	262.379	99.9052	262.379	99.9676	262.381	99.9887	262.514	81.2169	262.471	82.3329	262.431	83.4434	262.978	75.5994	262.961	75.8449	262.938	76.103
12.5113	262.379	99.9057	262.379	99.9678	262.381	99.9888	262.514	81.2128	262.471	82.329	262.43	83.461	262.978	75.5936	262.959	75.8853	262.938	76.113
12.5304	262.379	99.906	262.379	99.968	262.381	99.9888	262.514	81.2242	262.471	82.3205	262.431	83.4464	262.978	75.6007	262.957	75.874	262.938	76.119
12.5495	262.379	99.9065	262.379	99.9681	262.381	99.9889	262.514	81.2292	262.471	82.3254	262.431	83.4337	262.978	75.6193	262.957	75.8834	262.937	76.122
12.5686	262.379	99.9069	262.379	99.9683	262.381	99.989	262.514	81.231	262.471	82.3296	262.432	83.3956	262.976	75.6201	262.959	75.868	262.937	76.125
12.5876	262.379	99.9073	262.379	99.9685	262.381	99.9891	262.513	81.2452	262.47	82.361	262.433	83.3699	262.976	75.6181	262.958	75.8725	262.937	76.125
12.6067	262.379	99.9077	262.379	99.9687	262.381	99.9892	262.513	81.2359	262.469	82.3971	262.433	83.3746	262.977	75.6069	262.957	75.8735	262.937	76.124
12.6258	262.379	99.9081	262.379	99.9689	262.381	99.9892	262.513	81.2397	262.469	82.3886	262.432	83.4052	262.978	75.6031	262.957	75.8656	262.937	76.13
12.6448	262.379	99.9086	262.379	99.9691	262.381	99.9893	262.513	81.2447	262.47	82.3622	262.431	83.4314	262.979	75.6121	262.958	75.8577	262.938	76.137
12.6639	262.378	99.909	262.379	99.9693	262.381	99.9894	262.513	81.2396	262.47	82.3361	262.43	83.4561	262.978	75.6493	262.96	75.846	262.938	76.146
12.683	262.378	99.9094	262.379	99.9695	262.381	99.9895	262.513	81.236	262.47	82.3407	262.43	83.4766	262.978	75.6558	262.96	75.8777	262.937	76.16
12.7021	262.378	99.9098	262.379	99.9696	262.381	99.9895	262.513	81.2543	262.469	82.3667	262.43	83.4541	262.978	75.6515	262.957	75.9135	262.937	76.172
12.7211	262.378	99.9101	262.379	99.9698	262.381	99.9896	262.512	81.2594	262.468	82.4246	262.431	83.4364	262.976	75.6694	262.956	75.917	262.937	76.176
12.7402	262.378	99.9105	262.378	99.97	262.381	99.9897	262.512	81.2545	262.467	82.4538	262.43	83.4526	262.974	75.6769	262.957	75.9241	262.936	76.171
12.7593	262.378	99.9109	262.378	99.9702	262.381	99.9897	262.512	81.2533	262.466	82.4721	262.43	83.4811	262.975	75.6654	262.957	75.8951	262.936	76.166
12.7784	262.378	99.9113	262.378	99.9704	262.381	99.9898	262.513	81.2484	262.466	82.4667	262.429	83.5114	262.977	75.6338	262.957	75.904	262.937	76.158
12.7974	262.378	99.9117	262.378	99.9705	262.381	99.9899	262.512	81.2663	262.466	82.4773	262.429	83.4853	262.977	75.6234	262.958	75.8984	262.937	76.15
12.8165	262.378	99.9121	262.378	99.9707	262.381	99.99	262.511	81.2837	262.466	82.459	262.429	83.5114	262.977	75.632	262.957	75.8898	262.937	76.143
12.8356	262.378	99.9124	262.378	99.9709	262.381	99.9901	262.511	81.3008	262.466	82.4663	262.427	83.5537	262.976	75.6348	262.957	75.8891	262.937	76.141
12.8547	262.378	99.9128	262.378	99.971	262.381	99.9901	262.511	81.3057	262.466	82.4715	262.427	83.5621	262.977	75.6336	262.957	75.8877	262.937	76.138
12.8737	262.378	99.9132	262.378	99.9712	262.381	99.9902	262.511	81.3008	262.467	82.4476	262.426	83.5777	262.977	75.6196	262.958	75.8776	262.937	76.132
12.8928	262.378	99.9136	262.378	99.9713	262.381	99.9903	262.511	81.2953	262.467	82.4443	262.427	83.5725	262.978	75.6113	262.959	75.8713	262.938	76.126
12.9119	262.378	99.9139	262.378	99.9715	262.381	99.9904	262.511	81.2956	262.466	82.4584	262.427	83.5722	262.979	75.602	262.959	75.8673	262.938	76.122
12.931	262.378	99.9142	262.378	99.9716	262.381	99.9904	262.51	81.3087	262.466	82.4738	262.426	83.5887	262.979	75.6057	262.958	75.895	262.938	76.123
12.95	262.378	99.9145	262.378	99.9718	262.381	99.9905	262.51	81.3291	262.465	82.4909	262.425	83.6224	262.979	75.6111	262.957	75.8971	262.938	76.125
12.9691	262.378	99.9148	262.378	99.972	262.381	99.9906	262.509	81.353	262.465	82.4956	262.424	83.6563	262.977	75.6271	262.958	75.8751	262.937	76.127
12.9882	262.378	99.9152	262.378	99.9721	262.381	99.9906	262.508	81.3649	262.465	82.5024	262.424	83.6646	262.977	75.6197	262.959	75.888	262.937	76.125
13.0073	262.378	99.9155	262.378	99.9723	262.381	99.9907	262.509	81.3592	262.466	82.4665	262.424	83.6454	262.978	75.613	262.959	75.8757	262.938	76.123
13.0263	262.378	99.9158	262.378	99.9724	262.381	99.9908	262.509	81.3431	262.466	82.4745	262.425	83.6295	262.979	75.5941	262.958	75.9162	262.938	76.12
13.0454	262.378	99.9161	262.378	99.9726	262.381	99.9908	262.51	81.3195	262.465	82.4973	262.425	83.6129	262.979	75.6017	262.958	75.8905	262.937	76.117
13.0645	262.378	99.9165	262.378	99.9727	262.381	99.9909	262.51	81.3252	262.464	82.5391	262.426	83.5988	262.979	75.6103	262.958	75.8915	262.937	76.116
13.0835	262.378	99.9169	262.378	99.9728	262.381	99.991	262.509	81.3402	262.463	82.5503	262.424	83.6347	262.978	75.6072	262.957	75.8917	262.937	76.119
13.1026	262.378	99.9173	262.378	99.973	262.381	99.991	262.509	81.3438	262.464	82.5418	262.425	83.6147	262.978	75.6072	262.957	75.8813	262.938	76.121
13.1217	262.378	99.9176	262.378	99.9731	262.381	99.9911	262.508	81.3837	262.464	82.5328	262.424	83.6404	262.978	75.6072	262.959	75.863	262.938	76.122
13.1408	262.377	99.918	262.378	99.9733	262.381	99.9911	262.507	81.3899	262.464	82.5242	262.424	83.6566	262.977	75.6148	262.96	75.8463	262.938	76.12
13.1598	262.377	99.9183	262.378	99.9734	262.381	99.9912	262.507	81.4015	262.464	82.5297	262.424	83.6503	262.978	75.6131	262.959	75.866	262.938	76.118
13.1789	262.377	99.9186	262.378	99.9736	262.381	99.9913	262.507	81.3908	262.463	82.5571	262.423	83.6792	262.979	75.5997	262.958	75.857	262.938	76.119
13.198	262.377	99.9189	262.378	99.9737	262.381	99.9913	262.508	81.3755	262.462	82.5992	262.423	83.6661	262.979	75.5963	262.957	75.8339	262.939	76.119
13.2171	262.377	99.9192	262.378	99.9739	262.381	99.9914	262.508	81.3678	262.462	82.5981	262.423	83.6685	262.979	75.6117	262.96	75.8115	262.939	76.12
13.2361	262.377	99.9196	262.378	99.974	262.381	99.9915	262.507	81.3862	262.462	82.5967	262.424	83.6623	262.977	75.6164	262.962	75.7925	262.94	76.123
13.2552	262.377	99.92	262.378	99.9742	262.381	99.9915	262.506	81.4114	262.462	82.5709	262.424	83.6572	262.977	75.6172	262.963	75.8037	262.94	76.125
13.2743	262.377	99.9204	262.378	99.9743	262.381	99.9916	262.506	81.4325	262.463	82.5625	262.424	83.6573	262.978	75.6126	262.961	75.8501	262.94	76.122
13.2934	262.377	99.9207	262.378	99.9744	262.381	99.9916	262.506	81.4313	262.464	82.5384	262.424	83.6369	262.978	75.6072	262.958	75.8721	262.939	76.119
13.3124	262.377	99.921	262.378	99.9746	262.381	99.9917	262.505	81.4419	262.463	82.5398	262.424	83.6406	262.978	75.5958	262.957	75.8655	262.938	76.115
13.3315	262.377	99.9213	262.378	99.9747	262.381	99.9917	262.505	81.4429	262.463	82.554	262.424	83.634	262.977	75.6004	262.958	75.8322	262.939	76.109
13.3506	262.377	99.9216	262.378	99.9749	262.381	99.9918	262.506	81.4337	262.462	82.5747	262.424	83.6548	262.977	75.5972	262.96	75.7798	262.939	76.099
13.3697	262.377	99.9219	262.378	99.975	262.381	99.9919	262.506	81.4206	262.462	82.5893	262.423	83.6791	262.978	75.5848	262.963	75.7788	262.939	76.092
13.3887	262.377	99.9223	262.378	99.9752	262.381	99.9919	262.506	81.428	262.461	82.6206	262.422	83.7066	262.98	75.5565	262.961	75.8158	262.939	76.091
13.4078	262.377	99.9226	262.378	99.9753	262.381	99.992	262.505	81.4386	262.46	82.6452	262.421	83.7277	262.981	75.561	262.958	75.8582	262.939	76.094
13.4269	262.377	99.923	262.378	99.9755	262.381	99.992	262.505	81.4391	262.46	82.6373	262.42	83.7619	262.979	75.5946	262.957	75.8802	262.938	76.099
13.4459	262.377	99.9233	262.378	99.9756	262.381	99.9921	262.505	81.435	262.461	82.6232	262.421	83.7291	262.978	75.6161	262.959	75.8649	262.938	76.103
13.465	262.377	99.9236	262.378	99.9758	262.381	99.9922	262.506	81.4288	262.461	82.6233	262.423	83.6942	262.978	75.6049	262.96	75.8372	262.938	76.104
13.4841	262.377	99.9239	262.378	99.976	262.381	99.9922	262.505	81.4394	262.461	82.614	262.422	83.702	262.979	75.5799	262.959	75.8501	262.938	76.096
13.5032	262.377	99.9243	262.378	99.9761	262.381	99.9923	262.505	81.4349	262.461	82.6121	262.421	83.7323	262.979	75.5659	262.957	75.8527	262.938	76.082
13.5222	262.377	99.9246	262.378	99.9763	262.381	99.9923	262.505	81.4372	262.461	82.6021	262.42	83.7684	262.979	75.5512	262.957	75.8526	262.938	76.071
13.5413	262.377	99.9249	262.378	99.9764	262.381	99.9924	262.505	81.4444	262.462	82.5881	262.418	83.8254	262.98	75.5482	262.959	75.84	262.938	76.064
13.5604	262.377	99.9252	262.378	99.9765	262.381	99.9924	262.505	81.4536	262.462	82.5783	262.418	83.8343	262.981	75.5488	262.96	75.8249	262.938	76.066
13.5794	262.377	99.9255	262.378	99.9767	262.381	99.9925	262.504	81.4571	262.462	82.5862	262.419	83.7909	262.981	75.5467	262.96	75.8552	262.938	76.076
13.5985	262.377	99.9258	262.378	99.9768	262.381	99.9926	262.504	81.4668	262.462	82.5934	262.42	83.7592	262.98	75.5738	262.957	75.8829	262.937	76.088
13.6176	262.377	99.9262	262.378	99.9769	262.381	99.9926	262.504	81.476	262.461	82.6166	262.42	83.7654	262.979	75.6038	262.955	75.9049	262.937	76.098
13.6367	262.377	99.9265	262.378	99.977	262.381	99.9927	262.504	81.4744	262.46	82.6416	262.42	83.7638	262.978	75.6088	262.956	75.8674	262.937	76.107
13.6557	262.376	99.9269	262.378	99.9771	262.381	99.9927	262.504	81.455	262.459	82.6728	262.419	83.7892	262.978	75.5957	262.959	75.8586	262.937	76.109
13.6748	262.376	99.9272	262.378	99.9772	262.381	99.9928	262.505	81.4373	262.458	82.7072	262.419	83.7973	262.979	75.5934	262.96	75.8692	262.937	76.107
13.6939	262.376	99.9276	262.378	99.9774	262.381	99.9928	262.505	81.4372	262.457	82.7283	262.42	83.781	262.979	75.5816	262.958	75.9342	262.936	76.107
13.713	262.376	99.9279	262.378	99.9775	262.381	99.9929	262.505	81.4439	262.457	82.7436	262.42	83.782	262.978	75.5968	262.954	75.9789	262.935	76.108
13.732	262.376	99.9282	262.378	99.9776	262.381	99.9929	262.504	81.4629	262.457	82.7375	262.421	83.7438	262.978	75.6068	262.952	75.9895	262.934	76.109
13.7511	262.376	99.9285	262.378	99.9778	262.381	99.993	262.503	81.4829	262.457	82.7167	262.42	83.7662	262.978	75.6033	262.953	75.9421	262.934	76.109
13.7702	262.376	99.9288	262.378	99.9779	262.381	99.993	262.502	81.5101	262.458	82.7156	262.42	83.7712	262.979	75.5947	262.956	75.8838	262.935	76.11
13.7893	262.376	99.929	262.378	99.9781	262.381	99.9931	262.502	81.5146	262.458	82.7012	262.42	83.7793	262.979	75.585	262.958	75.8493	262.936	76.112
13.8083	262.376	99.9293	262.378	99.9782	262.381	99.9931	262.502	81.522	262.458	82.702	262.419	83.7937	262.978	75.6015	262.959	75.8698	262.937	76.112
13.8274	262.376	99.9297	262.378	99.9783	262.381	99.9932	262.502	81.5104	262.458	82.7077	262.419	83.7938	262.978	75.6136	262.957	75.9132	262.937	76.113
13.8465	262.376	99.93	262.378	99.9784	262.38	99.9932	262.503	81.4995	262.458	82.7134	262.421	83.7355	262.979	75.6075	262.956	75.9022	262.937	76.115
13.8656	262.376	99.9303	262.378	99.9785	262.38	99.9933	262.503	81.4942	262.457	82.7373	262.421	83.7295	262.978	75.5961	262.956	75.9008	262.937	76.113
13.8846	262.376	99.9306	262.378	99.9786	262.38	99.9933	262.503	81.4918	262.456	82.7628	262.42	83.7655	262.978	75.5974	262.958	75.8723	262.937	76.107
13.9037	262.376	99.9309	262.378	99.9787	262.38	99.9934	262.503	81.5033	262.456	82.772	262.42	83.784	262.978	75.59	262.96	75.863	262.938	76.101
13.9228	262.376	99.9312	262.378	99.9789	262.38	99.9934	262.503	81.5002	262.456	82.7548	262.419	83.8151	262.977	75.5832	262.959	75.8706	262.937	76.096
13.9419	262.376	99.9315	262.377	99.979	262.38	99.9934	262.503	81.4966	262.456	82.7484	262.417	83.8472	262.979	75.5788	262.957	75.8925	262.937	76.091
13.9609	262.376	99.9317	262.377	99.9791	262.38	99.9935	262.502	81.5114	262.458	82.7132	262.417	83.8778	262.979	75.5705	262.956	75.8876	262.937	76.09
13.98	262.376	99.932	262.377	99.9793	262.38	99.9935	262.502	81.5306	262.458	82.7061	262.416	83.8862	262.98	75.573	262.958	75.8578	262.938	76.092
13.9991	262.376	99.9323	262.377	99.9794	262.38	99.9936	262.502	81.5305	262.458	82.6904	262.415	83.9128	262.979	75.5869	262.961	75.8231	262.938	76.097
14.0181	262.376	99.9326	262.377	99.9795	262.38	99.9936	262.502	81.5299	262.458	82.692	262.414	83.9528	262.979	75.5903	262.961	75.8254	262.939	76.103
14.0372	262.376	99.9328	262.377	99.9796	262.38	99.9937	262.501	81.5373	262.458	82.7014	262.414	83.9657	262.978	75.6033	262.959	75.841	262.939	76.108
14.0563	262.376	99.9331	262.377	99.9798	262.38	99.9937	262.501	81.5361	262.456	82.7487	262.414	83.9573	262.978	75.6036	262.958	75.8419	262.939	76.11
14.0754	262.376	99.9334	262.377	99.9799	262.38	99.9938	262.501	81.5437	262.455	82.7864	262.414	83.941	262.979	75.5942	262.959	75.8315	262.939	76.112
14.0944	262.376	99.9337	262.377	99.98	262.38	99.9938	262.501	81.5538	262.454	82.8159	262.415	83.9296	262.979	75.5995	262.961	75.8223	262.939	76.114
14.1135	262.376	99.934	262.377	99.9801	262.38	99.9938	262.501	81.5502	262.454	82.8214	262.414	83.9402	262.979	75.6016	262.962	75.8305	262.939	76.114
14.1326	262.376	99.9342	262.377	99.9803	262.38	99.9939	262.501	81.5574	262.455	82.7986	262.414	83.9517	262.977	75.6093	262.959	75.8635	262.938	76.113
14.1517	262.376	99.9345	262.377	99.9803	262.38	99.9939	262.5	81.5774	262.455	82.7881	262.413	84.0012	262.977	75.6056	262.957	75.8835	262.938	76.107
14.1707	262.376	99.9347	262.377	99.9805	262.38	99.994	262.499	81.5956	262.456	82.7701	262.412	84.0275	262.977	75.587	262.956	75.8833	262.937	76.102
14.1898	262.376	99.935	262.377	99.9806	262.38	99.994	262.499	81.6051	262.455	82.7854	262.411	84.0355	262.979	75.572	262.958	75.8477	262.938	76.101
14.2089	262.376	99.9353	262.377	99.9807	262.38	99.9941	262.499	81.6005	262.454	82.8087	262.411	84.0432	262.98	75.5789	262.96	75.8209	262.939	76.106
14.2279	262.376	99.9356	262.377	99.9808	262.38	99.9941	262.499	81.5875	262.454	82.8259	262.411	84.0583	262.979	75.6013	262.962	75.8272	262.939	76.117
14.247	262.375	99.9359	262.377	99.9809	262.38	99.9941	262.5	81.5738	262.454	82.8111	262.409	84.0952	262.978	75.6326	262.96	75.8885	262.938	76.133
14.2661	262.375	99.9362	262.377	99.9811	262.38	99.9942	262.5	81.5653	262.453	82.8398	262.408	84.1305	262.977	75.6406	262.956	75.943	262.937	76.143
14.2852	262.375	99.9364	262.377	99.9812	262.38	99.9942	262.499	81.5841	262.452	82.8669	262.408	84.1354	262.976	75.6502	262.955	75.9658	262.936	76.149
14.3042	262.375	99.9367	262.377	99.9813	262.38	99.9943	262.499	81.5992	262.451	82.9006	262.409	84.1234	262.978	75.6302	262.956	75.9142	262.936	76.149
14.3233	262.375	99.937	262.377	99.9814	262.38	99.9943	262.498	81.6234	262.45	82.9317	262.409	84.1219	262.977	75.6314	262.958	75.8775	262.937	76.145
14.3424	262.375	99.9373	262.377	99.9815	262.38	99.9943	262.498	81.6174	262.45	82.952	262.409	84.0985	262.977	75.631	262.959	75.859	262.938	76.136
14.3615	262.375	99.9375	262.377	99.9816	262.38	99.9944	262.498	81.6262	262.45	82.9504	262.409	84.1153	262.977	75.6217	262.959	75.8591	262.938	76.13
14.3805	262.375	99.9378	262.377	99.9817	262.38	99.9944	262.498	81.6192	262.45	82.926	262.409	84.1112	262.978	75.6068	262.959	75.8938	262.937	76.126
14.3996	262.375	99.938	262.377	99.9818	262.38	99.9945	262.498	81.6196	262.45	82.9255	262.409	84.1101	262.979	75.5998	262.957	75.9262	262.937	76.125
14.4187	262.375	99.9383	262.377	99.9819	262.38	99.9945	262.498	81.6326	262.451	82.9206	262.41	84.075	262.979	75.6089	262.955	75.9392	262.936	76.128
14.4378	262.375	99.9386	262.377	99.982	262.38	99.9945	262.497	81.654	262.45	82.9391	262.411	84.0571	262.977	75.6265	262.956	75.9403	262.936	76.132
14.4568	262.375	99.9389	262.377	99.9821	262.38	99.9946	262.497	81.6661	262.45	82.931	262.411	84.0331	262.976	75.6369	262.956	75.9188	262.936	76.132
14.4759	262.375	99.9392	262.377	99.9822	262.38	99.9946	262.496	81.6824	262.45	82.927	262.412	84.0305	262.977	75.6284	262.958	75.9255	262.936	76.128
14.495	262.375	99.9394	262.377	99.9823	262.38	99.9946	262.496	81.6867	262.45	82.9283	262.412	84.0265	262.979	75.6002	262.958	75.9072	262.936	76.123
14.5141	262.375	99.9396	262.377	99.9824	262.38	99.9947	262.496	81.6923	262.45	82.9428	262.41	84.0679	262.979	75.5901	262.956	75.9406	262.936	76.118
14.5331	262.375	99.9398	262.377	99.9825	262.38	99.9947	262.496	81.6667	262.449	82.9669	262.41	84.0906	262.979	75.5993	262.955	75.9302	262.936	76.116
14.5522	262.375	99.9401	262.377	99.9826	262.38	99.9948	262.497	81.6627	262.448	83.0109	262.41	84.0846	262.978	75.6109	262.956	75.9039	262.936	76.116
14.5713	262.375	99.9403	262.377	99.9827	262.38	99.9948	262.497	81.6571	262.448	83.0114	262.41	84.0855	262.977	75.6179	262.958	75.8994	262.937	76.112
14.5904	262.375	99.9406	262.377	99.9828	262.38	99.9948	262.497	81.6603	262.447	83.0278	262.41	84.069	262.978	75.6008	262.959	75.8865	262.937	76.105
14.6094	262.375	99.9408	262.377	99.9829	262.38	99.9949	262.497	81.6625	262.448	82.9975	262.41	84.0902	262.979	75.5741	262.959	75.8972	262.937	76.097
14.6285	262.375	99.941	262.377	99.983	262.38	99.9949	262.496	81.669	262.449	82.9649	262.41	84.0749	262.979	75.5642	262.956	75.9406	262.936	76.088
14.6476	262.375	99.9413	262.377	99.9831	262.38	99.9949	262.496	81.6887	262.45	82.9351	262.41	84.0665	262.98	75.5708	262.955	75.9557	262.936	76.086
14.6666	262.375	99.9415	262.377	99.9832	262.38	99.995	262.495	81.6932	262.451	82.9133	262.411	84.0459	262.98	75.5708	262.957	75.93	262.936	76.089
14.6857	262.375	99.9418	262.377	99.9833	262.38	99.995	262.496	81.6851	262.451	82.9167	262.411	84.0607	262.979	75.59	262.959	75.9071	262.936	76.096
14.7048	262.375	99.942	262.377	99.9834	262.38	99.995	262.496	81.6874	262.45	82.9259	262.41	84.0681	262.98	75.59	262.958	75.9243	262.936	76.104
14.7239	262.375	99.9423	262.377	99.9835	262.38	99.9951	262.496	81.6788	262.449	82.9525	262.409	84.1032	262.979	75.6009	262.955	75.9578	262.936	76.111
14.7429	262.375	99.9425	262.377	99.9836	262.38	99.9951	262.496	81.6675	262.449	82.9621	262.409	84.1216	262.979	75.6093	262.954	75.9596	262.936	76.112
14.762	262.375	99.9428	262.377	99.9837	262.38	99.9952	262.496	81.6642	262.449	82.9522	262.409	84.1218	262.979	75.6068	262.956	75.9235	262.936	76.112
14.7811	262.375	99.9431	262.377	99.9838	262.38	99.9952	262.496	81.6811	262.449	82.9719	262.409	84.1131	262.979	75.5951	262.958	75.927	262.936	76.11
14.8002	262.375	99.9433	262.377	99.9839	262.38	99.9952	262.495	81.7017	262.448	82.9958	262.409	84.1007	262.979	75.5894	262.959	75.9133	262.936	76.105
14.8192	262.375	99.9436	262.377	99.984	262.38	99.9953	262.495	81.7153	262.448	83.004	262.409	84.1159	262.978	75.5898	262.957	75.9428	262.936	76.101
14.8383	262.375	99.9438	262.377	99.9841	262.38	99.9953	262.494	81.7268	262.447	83.026	262.409	84.1195	262.977	75.5856	262.956	75.9551	262.936	76.098
14.8574	262.375	99.944	262.377	99.9842	262.38	99.9953	262.494	81.7407	262.447	83.0213	262.409	84.1114	262.979	75.5838	262.955	75.9553	262.936	76.098
14.8765	262.375	99.9443	262.377	99.9843	262.38	99.9954	262.494	81.7435	262.447	83.0166	262.409	84.1157	262.98	75.5795	262.957	75.9294	262.936	76.105
14.8955	262.375	99.9445	262.377	99.9844	262.38	99.9954	262.493	81.7491	262.448	83.0059	262.41	84.0891	262.98	75.5927	262.958	75.9111	262.937	76.116
14.9146	262.374	99.9448	262.377	99.9845	262.38	99.9954	262.493	81.7554	262.448	82.9991	262.409	84.118	262.979	75.6213	262.958	75.9289	262.937	76.131
14.9337	262.374	99.945	262.377	99.9846	262.38	99.9954	262.493	81.7505	262.448	82.9943	262.409	84.1063	262.977	75.6412	262.957	75.9435	262.937	76.143
14.9527	262.374	99.9452	262.377	99.9847	262.38	99.9955	262.493	81.7493	262.448	83.0077	262.408	84.1537	262.976	75.6585	262.956	75.9504	262.936	76.146
14.9718	262.374	99.9455	262.377	99.9847	262.38	99.9955	262.493	81.7669	262.447	83.0289	262.406	84.1909	262.977	75.6414	262.956	75.9422	262.936	76.141
14.9909	262.374	99.9457	262.377	99.9848	262.38	99.9955	262.492	81.7887	262.447	83.0372	262.405	84.2208	262.977	75.6085	262.957	75.934	262.937	76.132
15.01	262.374	99.9459	262.377	99.9849	262.38	99.9956	262.491	81.8104	262.447	83.0202	262.405	84.2182	262.978	75.5935	262.959	75.9122	262.937	76.117
15.029	262.374	99.9462	262.377	99.985	262.38	99.9956	262.491	81.8122	262.447	83.0231	262.406	84.2034	262.977	75.6008	262.959	75.9167	262.937	76.103
15.0481	262.374	99.9464	262.377	99.9851	262.38	99.9956	262.491	81.8053	262.447	83.0277	262.407	84.1837	262.978	75.5817	262.956	75.9342	262.937	76.096
15.0672	262.374	99.9466	262.377	99.9852	262.38	99.9957	262.492	81.7848	262.446	83.0526	262.407	84.1839	262.979	75.5725	262.956	75.9253	262.937	76.096
15.0863	262.374	99.9469	262.377	99.9853	262.38	99.9957	262.493	81.7732	262.446	83.0723	262.406	84.1947	262.98	75.5717	262.957	75.8901	262.937	76.097
15.1053	262.374	99.9471	262.377	99.9854	262.38	99.9957	262.492	81.7747	262.445	83.0755	262.405	84.2288	262.979	75.5913	262.959	75.8754	262.938	76.104
15.1244	262.374	99.9473	262.377	99.9854	262.38	99.9958	262.492	81.7801	262.446	83.0616	262.404	84.2525	262.979	75.6097	262.961	75.879	262.939	76.113
15.1435	262.374	99.9475	262.377	99.9855	262.38	99.9958	262.492	81.7967	262.446	83.0645	262.405	84.2392	262.979	75.615	262.962	75.8908	262.938	76.127
15.1625	262.374	99.9478	262.377	99.9856	262.38	99.9958	262.491	81.8065	262.446	83.0666	262.405	84.2427	262.979	75.6183	262.958	75.9407	262.937	76.139
15.1816	262.374	99.948	262.377	99.9857	262.38	99.9958	262.491	81.8077	262.445	83.0846	262.405	84.2457	262.977	75.6436	262.955	75.9749	262.937	76.146
15.2007	262.374	99.9482	262.377	99.9858	262.38	99.9959	262.491	81.8071	262.445	83.0945	262.404	84.2619	262.976	75.6488	262.955	75.9376	262.936	76.15
15.2198	262.374	99.9484	262.377	99.9858	262.38	99.9959	262.491	81.8015	262.445	83.1017	262.403	84.2837	262.977	75.6431	262.956	75.8959	262.937	76.153
15.2388	262.374	99.9487	262.377	99.9859	262.38	99.9959	262.491	81.8035	262.445	83.0933	262.403	84.3074	262.978	75.6356	262.959	75.8751	262.938	76.154
15.2579	262.374	99.9489	262.377	99.986	262.38	99.996	262.491	81.8121	262.444	83.1074	262.403	84.2976	262.977	75.6361	262.961	75.8881	262.938	76.151
15.277	262.374	99.9491	262.377	99.9861	262.38	99.996	262.49	81.844	262.444	83.1282	262.402	84.3126	262.976	75.6465	262.961	75.916	262.938	76.147
15.2961	262.374	99.9493	262.377	99.9861	262.38	99.996	262.49	81.8489	262.443	83.1491	262.402	84.3351	262.976	75.6363	262.956	75.9772	262.936	76.142
15.3151	262.374	99.9495	262.377	99.9862	262.38	99.996	262.489	81.8614	262.443	83.1468	262.4	84.3816	262.977	75.6225	262.954	75.9935	262.935	76.136
15.3342	262.374	99.9497	262.377	99.9863	262.38	99.9961	262.49	81.8573	262.443	83.1484	262.4	84.3881	262.978	75.6078	262.953	75.9782	262.935	76.13
15.3533	262.374	99.9499	262.377	99.9864	262.38	99.9961	262.489	81.8601	262.443	83.1395	262.399	84.4122	262.978	75.6052	262.955	75.9273	262.935	76.126
15.3724	262.374	99.9501	262.377	99.9865	262.38	99.9961	262.489	81.8656	262.443	83.1479	262.4	84.3817	262.978	75.6163	262.958	75.883	262.936	76.127
15.3914	262.374	99.9503	262.377	99.9865	262.38	99.9962	262.489	81.8854	262.443	83.1548	262.4	84.3791	262.978	75.6206	262.96	75.8662	262.937	76.131
15.4105	262.374	99.9506	262.377	99.9866	262.38	99.9962	262.488	81.9063	262.443	83.1562	262.4	84.3735	262.977	75.6275	262.959	75.8803	262.937	76.133
15.4296	262.374	99.9507	262.377	99.9867	262.38	99.9962	262.488	81.9163	262.443	83.1383	262.4	84.3905	262.978	75.6268	262.956	75.8823	262.937	76.131
15.4487	262.374	99.951	262.377	99.9868	262.38	99.9962	262.488	81.9129	262.443	83.1482	262.4	84.3782	262.978	75.6117	262.956	75.8806	262.938	76.13
15.4677	262.374	99.9512	262.377	99.9868	262.38	99.9963	262.488	81.9	262.442	83.1677	262.4	84.3993	262.978	75.6071	262.958	75.8518	262.938	76.128
15.4868	262.374	99.9514	262.377	99.9869	262.38	99.9963	262.488	81.889	262.441	83.1982	262.4	84.3881	262.978	75.617	262.962	75.8329	262.939	76.126
15.5059	262.374	99.9517	262.377	99.987	262.38	99.9963	262.488	81.8986	262.44	83.2262	262.4	84.397	262.978	75.6172	262.963	75.8643	262.939	76.129
15.525	262.374	99.9519	262.377	99.9871	262.38	99.9963	262.488	81.9001	262.44	83.2459	262.399	84.4261	262.978	75.6149	262.96	75.9265	262.938	76.133
15.544	262.374	99.9521	262.377	99.9871	262.38	99.9964	262.488	81.8909	262.44	83.2444	262.399	84.4188	262.978	75.6274	262.955	75.9612	262.937	76.138
15.5631	262.374	99.9523	262.377	99.9872	262.38	99.9964	262.488	81.8987	262.439	83.2553	262.399	84.4022	262.978	75.6311	262.955	75.9639	262.937	76.146
15.5822	262.374	99.9525	262.377	99.9873	262.38	99.9964	262.488	81.8862	262.44	83.2523	262.4	84.3846	262.978	75.6419	262.957	75.9229	262.937	76.156
15.6012	262.374	99.9527	262.377	99.9874	262.38	99.9964	262.488	81.8879	262.44	83.2461	262.401	84.3697	262.977	75.6528	262.959	75.8795	262.938	76.163
15.6203	262.374	99.9529	262.377	99.9874	262.38	99.9965	262.488	81.8881	262.439	83.2545	262.4	84.373	262.976	75.6691	262.96	75.8814	262.938	76.167
15.6394	262.374	99.9531	262.377	99.9875	262.38	99.9965	262.488	81.8893	262.439	83.2687	262.399	84.4117	262.976	75.6612	262.959	75.8881	262.938	76.17
15.6585	262.374	99.9533	262.377	99.9876	262.38	99.9965	262.488	81.9003	262.439	83.2671	262.399	84.426	262.977	75.6529	262.957	75.8984	262.937	76.172
15.6775	262.374	99.9535	262.377	99.9876	262.38	99.9965	262.488	81.8899	262.438	83.2984	262.399	84.4225	262.977	75.6544	262.956	75.9055	262.937	76.172
15.6966	262.373	99.9537	262.377	99.9877	262.38	99.9966	262.488	81.8872	262.438	83.3019	262.4	84.397	262.977	75.6631	262.957	75.8864	262.938	76.173
15.7157	262.373	99.9539	262.377	99.9878	262.38	99.9966	262.488	81.8938	262.438	83.3057	262.401	84.3676	262.976	75.669	262.961	75.882	262.938	76.174
15.7348	262.373	99.9541	262.377	99.9879	262.38	99.9966	262.488	81.8839	262.439	83.2826	262.402	84.3381	262.977	75.6678	262.961	75.9105	262.937	76.174
15.7538	262.373	99.9543	262.376	99.9879	262.38	99.9966	262.488	81.8899	262.439	83.2771	262.4	84.3727	262.977	75.657	262.957	75.9803	262.936	76.169
15.7729	262.373	99.9544	262.376	99.988	262.38	99.9967	262.488	81.8885	262.438	83.3037	262.398	84.4333	262.977	75.652	262.953	76.0214	262.935	76.16
15.792	262.373	99.9547	262.376	99.9881	262.38	99.9967	262.488	81.9075	262.437	83.3363	262.397	84.4764	262.977	75.6384	262.951	76.0153	262.934	76.151
15.811	262.373	99.9549	262.376	99.9881	262.38	99.9967	262.487	81.9161	262.435	83.3777	262.398	84.4475	262.978	75.6265	262.954	75.9356	262.935	76.147
15.8301	262.373	99.955	262.376	99.9882	262.38	99.9967	262.487	81.9219	262.435	83.3829	262.399	84.4279	262.979	75.62	262.958	75.8871	262.936	76.149
15.8492	262.373	99.9552	262.376	99.9883	262.38	99.9968	262.486	81.953	262.436	83.3754	262.399	84.4056	262.98	75.6389	262.96	75.8659	262.937	76.156
15.8683	262.373	99.9554	262.376	99.9883	262.38	99.9968	262.486	81.9635	262.436	83.3696	262.399	84.4205	262.979	75.6607	262.959	75.8984	262.937	76.168
15.8873	262.373	99.9556	262.376	99.9884	262.38	99.9968	262.486	81.9482	262.435	83.3765	262.397	84.4638	262.978	75.6752	262.956	75.939	262.937	76.18
15.9064	262.373	99.9558	262.376	99.9885	262.38	99.9968	262.486	81.9426	262.437	83.3375	262.396	84.5089	262.976	75.6837	262.955	75.9537	262.937	76.187
15.9255	262.373	99.956	262.376	99.9885	262.38	99.9968	262.486	81.943	262.437	83.3381	262.395	84.5395	262.975	75.6835	262.956	75.9163	262.937	76.187
15.9446	262.373	99.9561	262.376	99.9886	262.38	99.9969	262.486	81.9451	262.436	83.3623	262.396	84.5188	262.975	75.6747	262.959	75.8919	262.937	76.183
15.9636	262.373	99.9564	262.376	99.9887	262.38	99.9969	262.486	81.9531	262.436	83.354	262.396	84.5093	262.977	75.6587	262.96	75.8785	262.938	76.178
15.9827	262.373	99.9566	262.376	99.9887	262.38	99.9969	262.486	81.9671	262.436	83.3521	262.397	84.4737	262.977	75.6549	262.959	75.8933	262.938	76.176
16.0018	262.373	99.9567	262.376	99.9888	262.38	99.9969	262.485	81.9716	262.436	83.3537	262.397	84.4844	262.976	75.6587	262.957	75.9208	262.937	76.173
16.0209	262.373	99.9569	262.376	99.9889	262.38	99.997	262.486	81.9545	262.437	83.3274	262.398	84.4613	262.976	75.6735	262.957	75.9331	262.937	76.17
16.0399	262.373	99.9571	262.376	99.9889	262.38	99.997	262.486	81.938	262.437	83.3369	262.397	84.466	262.976	75.6617	262.957	75.9076	262.937	76.162
16.059	262.373	99.9573	262.376	99.989	262.38	99.997	262.486	81.9474	262.437	83.3269	262.397	84.4751	262.977	75.6417	262.959	75.8587	262.938	76.155
16.0781	262.373	99.9575	262.376	99.9891	262.38	99.997	262.486	81.945	262.437	83.3189	262.397	84.4935	262.978	75.6154	262.96	75.8303	262.939	76.145
16.0971	262.373	99.9576	262.376	99.9891	262.38	99.997	262.486	81.965	262.437	83.3301	262.395	84.5353	262.979	75.623	262.96	75.8332	262.94	76.14
16.1162	262.373	99.9578	262.376	99.9892	262.38	99.9971	262.485	81.9833	262.437	83.3333	262.394	84.5716	262.979	75.6218	262.962	75.8356	262.941	76.14
16.1353	262.373	99.958	262.376	99.9892	262.38	99.9971	262.484	82.0084	262.436	83.3521	262.394	84.5743	262.979	75.637	262.963	75.8385	262.94	76.144
16.1544	262.373	99.9582	262.376	99.9893	262.38	99.9971	262.483	82.0323	262.435	83.3847	262.394	84.5657	262.979	75.6451	262.961	75.896	262.939	76.147
16.1734	262.373	99.9584	262.376	99.9894	262.38	99.9971	262.483	82.0486	262.435	83.3978	262.393	84.6069	262.979	75.6348	262.958	75.934	262.938	76.151
16.1925	262.373	99.9586	262.376	99.9894	262.38	99.9971	262.483	82.0486	262.434	83.4198	262.393	84.601	262.978	75.6364	262.956	75.9176	262.937	76.149
16.2116	262.373	99.9588	262.376	99.9895	262.38	99.9972	262.483	82.036	262.434	83.4151	262.392	84.6489	262.977	75.6399	262.956	75.9112	262.937	76.142
16.2307	262.373	99.959	262.376	99.9896	262.38	99.9972	262.484	82.0051	262.434	83.4182	262.39	84.7057	262.978	75.627	262.958	75.8828	262.938	76.135
16.2497	262.373	99.9592	262.376	99.9896	262.38	99.9972	262.484	82.0079	262.434	83.4292	262.389	84.7207	262.979	75.6112	262.961	75.8484	262.938	76.126
16.2688	262.373	99.9593	262.376	99.9897	262.38	99.9972	262.483	82.0288	262.433	83.4463	262.39	84.7051	262.979	75.6009	262.962	75.8799	262.938	76.117
16.2879	262.373	99.9595	262.376	99.9897	262.38	99.9972	262.482	82.063	262.433	83.462	262.39	84.6889	262.979	75.5929	262.957	75.9307	262.938	76.111
16.307	262.373	99.9597	262.376	99.9898	262.38	99.9973	262.482	82.078	262.433	83.458	262.391	84.6709	262.98	75.5934	262.955	75.9508	262.937	76.107
16.326	262.373	99.9598	262.376	99.9899	262.38	99.9973	262.481	82.0855	262.433	83.4519	262.39	84.6922	262.98	75.5954	262.956	75.9196	262.937	76.109
16.3451	262.373	99.96	262.376	99.9899	262.38	99.9973	262.481	82.1051	262.433	83.4385	262.389	84.7227	262.98	75.5925	262.958	75.8931	262.937	76.116
16.3642	262.373	99.9602	262.376	99.99	262.38	99.9973	262.481	82.1021	262.433	83.4609	262.388	84.7438	262.98	75.6111	262.961	75.8746	262.938	76.125
16.3833	262.373	99.9603	262.376	99.99	262.38	99.9973	262.481	82.0948	262.433	83.4461	262.389	84.7348	262.979	75.6266	262.96	75.8922	262.938	76.136
16.4023	262.373	99.9605	262.376	99.9901	262.38	99.9974	262.481	82.1018	262.433	83.4627	262.389	84.7383	262.978	75.6379	262.957	75.9429	262.937	76.145
16.4214	262.373	99.9606	262.376	99.9901	262.38	99.9974	262.48	82.1272	262.432	83.4684	262.389	84.7138	262.976	75.6525	262.955	75.9432	262.937	76.147
16.4405	262.373	99.9608	262.376	99.9902	262.38	99.9974	262.48	82.1386	262.433	83.4636	262.39	84.6999	262.977	75.6365	262.956	75.9049	262.937	76.146
16.4596	262.373	99.9609	262.376	99.9903	262.38	99.9974	262.48	82.1342	262.433	83.4549	262.39	84.6858	262.978	75.6205	262.958	75.8777	262.937	76.145
16.4786	262.373	99.9611	262.376	99.9903	262.38	99.9974	262.48	82.1384	262.433	83.4491	262.389	84.7174	262.978	75.6242	262.96	75.8583	262.938	76.143
16.4977	262.373	99.9613	262.376	99.9904	262.38	99.9974	262.48	82.1268	262.432	83.4687	262.389	84.7389	262.977	75.6324	262.961	75.8491	262.938	76.145
16.5168	262.373	99.9614	262.376	99.9904	262.38	99.9975	262.48	82.1267	262.432	83.4824	262.387	84.7885	262.977	75.6437	262.959	75.8708	262.938	76.148
16.5358	262.373	99.9616	262.376	99.9905	262.38	99.9975	262.48	82.1153	262.432	83.4852	262.386	84.8087	262.977	75.6424	262.958	75.8804	262.939	76.149
16.5549	262.373	99.9618	262.376	99.9905	262.38	99.9975	262.481	82.1069	262.431	83.4973	262.386	84.811	262.977	75.6363	262.958	75.8777	262.939	76.147
16.574	262.373	99.9619	262.376	99.9906	262.38	99.9975	262.481	82.1067	262.432	83.4869	262.386	84.812	262.978	75.6295	262.96	75.8595	262.938	76.141
16.5931	262.373	99.9621	262.376	99.9906	262.38	99.9975	262.481	82.1071	262.432	83.484	262.387	84.7941	262.978	75.6223	262.96	75.8645	262.938	76.135
16.6121	262.373	99.9622	262.376	99.9907	262.38	99.9976	262.481	82.1054	262.433	83.4629	262.387	84.7784	262.979	75.6171	262.958	75.8889	262.938	76.13
16.6312	262.373	99.9624	262.376	99.9908	262.38	99.9976	262.481	82.1093	262.433	83.4611	262.388	84.7615	262.979	75.6111	262.958	75.8788	262.938	76.127
16.6503	262.372	99.9626	262.376	99.9908	262.38	99.9976	262.48	82.1274	262.432	83.474	262.387	84.7906	262.978	75.6088	262.957	75.8681	262.938	76.127
16.6694	262.372	99.9627	262.376	99.9909	262.38	99.9976	262.479	82.1428	262.432	83.4899	262.387	84.8004	262.978	75.6164	262.959	75.8251	262.939	76.127
16.6884	262.372	99.9629	262.376	99.9909	262.38	99.9976	262.479	82.1597	262.432	83.4899	262.386	84.8289	262.978	75.6224	262.961	75.8081	262.939	76.125
16.7075	262.372	99.963	262.376	99.991	262.38	99.9977	262.478	82.1723	262.431	83.502	262.386	84.8266	262.979	75.6171	262.962	75.834	262.94	76.123
16.7266	262.372	99.9632	262.376	99.991	262.38	99.9977	262.479	82.1682	262.432	83.4942	262.387	84.8027	262.978	75.6015	262.961	75.862	262.94	76.118
16.7457	262.372	99.9634	262.376	99.9911	262.38	99.9977	262.479	82.1666	262.431	83.507	262.386	84.807	262.978	75.5975	262.96	75.8965	262.939	76.111
16.7647	262.372	99.9635	262.376	99.9911	262.38	99.9977	262.479	82.1482	262.431	83.5097	262.387	84.7935	262.979	75.5918	262.958	75.9068	262.938	76.105
16.7838	262.372	99.9637	262.376	99.9912	262.38	99.9977	262.479	82.1613	262.43	83.5282	262.387	84.7838	262.98	75.59	262.957	75.8873	262.938	76.106
16.8029	262.372	99.9639	262.376	99.9912	262.38	99.9977	262.479	82.1658	262.431	83.5232	262.386	84.814	262.98	75.5868	262.958	75.8774	262.938	76.111
16.822	262.372	99.964	262.376	99.9913	262.38	99.9978	262.478	82.1815	262.431	83.5238	262.387	84.7762	262.98	75.6062	262.959	75.8659	262.938	76.121
16.841	262.372	99.9642	262.376	99.9913	262.38	99.9978	262.478	82.1975	262.431	83.517	262.388	84.7689	262.979	75.6229	262.959	75.8691	262.938	76.129
16.8601	262.372	99.9643	262.376	99.9914	262.38	99.9978	262.477	82.206	262.431	83.5201	262.388	84.7674	262.977	75.6383	262.959	75.8721	262.938	76.137
16.8792	262.372	99.9645	262.376	99.9914	262.38	99.9978	262.477	82.2139	262.43	83.5291	262.387	84.7845	262.977	75.6313	262.958	75.8704	262.938	76.136
16.8982	262.372	99.9646	262.376	99.9915	262.38	99.9978	262.477	82.2183	262.43	83.5501	262.386	84.8078	262.976	75.625	262.958	75.8713	262.938	76.126
16.9173	262.372	99.9648	262.376	99.9915	262.38	99.9978	262.477	82.2153	262.43	83.5333	262.384	84.8701	262.978	75.601	262.959	75.8464	262.938	76.114
16.9364	262.372	99.9649	262.376	99.9916	262.38	99.9978	262.477	82.2192	262.43	83.5327	262.383	84.9029	262.98	75.5738	262.96	75.8226	262.939	76.109
16.9555	262.372	99.965	262.376	99.9916	262.38	99.9979	262.477	82.2205	262.43	83.5362	262.383	84.9267	262.98	75.58	262.961	75.8212	262.94	76.108
16.9745	262.372	99.9652	262.376	99.9917	262.38	99.9979	262.477	82.2228	262.43	83.5348	262.384	84.8925	262.98	75.6032	262.962	75.8337	262.94	76.115
16.9936	262.372	99.9654	262.376	99.9917	262.38	99.9979	262.477	82.2248	262.43	83.5387	262.384	84.8719	262.979	75.6237	262.961	75.8545	262.94	76.127
17.0127	262.372	99.9655	262.376	99.9918	262.38	99.9979	262.477	82.2159	262.429	83.5613	262.384	84.8867	262.978	75.6362	262.959	75.8666	262.94	76.134
17.0318	262.372	99.9656	262.376	99.9918	262.38	99.9979	262.477	82.2115	262.429	83.5638	262.383	84.9041	262.978	75.6329	262.959	75.8454	262.939	76.136
17.0508	262.372	99.9658	262.376	99.9919	262.38	99.9979	262.477	82.2172	262.429	83.5719	262.381	84.9705	262.979	75.6135	262.96	75.8364	262.94	76.134
17.0699	262.372	99.9659	262.376	99.9919	262.38	99.9979	262.476	82.2285	262.429	83.5808	262.38	85.0152	262.978	75.6123	262.96	75.7928	262.94	76.125
17.089	262.372	99.9661	262.376	99.992	262.38	99.998	262.476	82.2276	262.428	83.5993	262.379	85.0528	262.977	75.6147	262.962	75.7731	262.942	76.114
17.108	262.372	99.9662	262.376	99.992	262.38	99.998	262.476	82.2355	262.428	83.601	262.379	85.0363	262.978	75.593	262.964	75.7719	262.942	76.103
17.1271	262.372	99.9663	262.376	99.992	262.38	99.998	262.476	82.2382	262.428	83.6088	262.38	85.0063	262.979	75.5752	262.965	75.7736	262.942	76.094
17.1462	262.372	99.9665	262.376	99.9921	262.38	99.998	262.476	82.2358	262.428	83.6178	262.381	84.978	262.98	75.5591	262.963	75.7995	262.942	76.092
17.1653	262.372	99.9666	262.376	99.9921	262.38	99.998	262.476	82.2408	262.427	83.6271	262.382	84.9436	262.981	75.5681	262.96	75.8256	262.941	76.098
17.1843	262.372	99.9667	262.376	99.9922	262.38	99.998	262.476	82.2308	262.427	83.6234	262.382	84.9365	262.979	75.6044	262.96	75.7941	262.941	76.106
17.2034	262.372	99.9669	262.376	99.9922	262.38	99.998	262.476	82.2414	262.427	83.6421	262.383	84.9259	262.978	75.6213	262.962	75.7773	262.941	76.116
17.2225	262.372	99.967	262.376	99.9923	262.38	99.9981	262.476	82.2527	262.426	83.6562	262.383	84.9216	262.978	75.6192	262.964	75.7668	262.942	76.124
17.2416	262.372	99.9672	262.376	99.9923	262.38	99.9981	262.476	82.2424	262.426	83.668	262.383	84.9148	262.979	75.6066	262.964	75.7764	262.942	76.125
17.2606	262.372	99.9673	262.376	99.9924	262.38	99.9981	262.476	82.2295	262.425	83.6814	262.383	84.9016	262.978	75.6082	262.962	75.7939	262.941	76.125
17.2797	262.372	99.9675	262.376	99.9924	262.38	99.9981	262.477	82.2194	262.425	83.6806	262.384	84.8898	262.977	75.6107	262.96	75.8197	262.941	76.121
17.2988	262.372	99.9676	262.376	99.9924	262.38	99.9981	262.477	82.2176	262.426	83.6775	262.383	84.911	262.977	75.6215	262.959	75.8421	262.94	76.118
17.3179	262.372	99.9678	262.376	99.9925	262.38	99.9981	262.476	82.2302	262.425	83.6928	262.383	84.9206	262.978	75.596	262.96	75.7951	262.94	76.113
17.3369	262.372	99.9679	262.376	99.9925	262.38	99.9981	262.475	82.254	262.425	83.6904	262.383	84.9209	262.978	75.5926	262.961	75.7852	262.94	76.109
17.356	262.372	99.9681	262.376	99.9926	262.38	99.9982	262.475	82.2651	262.425	83.6871	262.382	84.9437	262.979	75.5858	262.962	75.7978	262.94	76.105
17.3751	262.372	99.9682	262.376	99.9926	262.38	99.9982	262.475	82.2738	262.425	83.7026	262.382	84.958	262.979	75.5889	262.962	75.8318	262.94	76.106
17.3941	262.372	99.9684	262.376	99.9927	262.38	99.9982	262.475	82.2792	262.425	83.7037	262.381	84.9856	262.978	75.6016	262.959	75.8683	262.939	76.108
17.4132	262.372	99.9685	262.376	99.9927	262.38	99.9982	262.475	82.2723	262.424	83.7145	262.381	84.9657	262.978	75.6005	262.958	75.8649	262.938	76.112
17.4323	262.372	99.9686	262.376	99.9927	262.38	99.9982	262.475	82.2594	262.425	83.6954	262.382	84.9438	262.977	75.6057	262.958	75.8696	262.938	76.112
17.4514	262.372	99.9687	262.376	99.9928	262.38	99.9982	262.475	82.2566	262.425	83.6854	262.381	84.9666	262.977	75.6033	262.959	75.8392	262.938	76.106
17.4704	262.372	99.9689	262.376	99.9928	262.38	99.9982	262.475	82.2643	262.425	83.6844	262.381	84.9629	262.978	75.5906	262.96	75.8117	262.939	76.1
17.4895	262.372	99.969	262.376	99.9929	262.38	99.9983	262.475	82.2784	262.424	83.7134	262.382	84.957	262.98	75.5686	262.961	75.8263	262.939	76.097
17.5086	262.372	99.9692	262.376	99.9929	262.38	99.9983	262.474	82.2883	262.423	83.7423	262.38	85	262.98	75.5722	262.961	75.838	262.939	76.097
17.5277	262.372	99.9693	262.376	99.9929	262.38	99.9983	262.473	82.3147	262.423	83.7578	262.38	85.0138	262.98	75.589	262.959	75.8618	262.938	76.099
17.5467	262.372	99.9694	262.376	99.993	262.38	99.9983	262.472	82.343	262.423	83.7677	262.379	85.0314	262.979	75.6038	262.957	75.9036	262.938	76.104
17.5658	262.372	99.9696	262.376	99.993	262.38	99.9983	262.472	82.3586	262.422	83.7786	262.379	85.0499	262.979	75.6022	262.957	75.8806	262.938	76.107
17.5849	262.372	99.9697	262.376	99.9931	262.38	99.9983	262.472	82.3711	262.423	83.7531	262.378	85.0595	262.978	75.5926	262.959	75.8454	262.938	76.107
17.604	262.372	99.9698	262.376	99.9931	262.38	99.9983	262.471	82.3779	262.424	83.7193	262.378	85.0764	262.977	75.5902	262.96	75.8089	262.939	76.1
17.623	262.372	99.9699	262.376	99.9931	262.38	99.9983	262.471	82.3797	262.424	83.7102	262.378	85.0717	262.977	75.5844	262.959	75.801	262.939	76.092
17.6421	262.372	99.9701	262.376	99.9932	262.38	99.9983	262.472	82.367	262.425	83.7097	262.378	85.0716	262.979	75.5703	262.96	75.8207	262.94	76.086
17.6612	262.372	99.9702	262.376	99.9932	262.38	99.9984	262.472	82.3647	262.424	83.7258	262.379	85.0511	262.98	75.5614	262.961	75.799	262.94	76.083
17.6803	262.372	99.9703	262.376	99.9933	262.38	99.9984	262.472	82.3647	262.423	83.7432	262.379	85.052	262.98	75.5638	262.961	75.7939	262.94	76.083
17.6993	262.372	99.9705	262.376	99.9933	262.38	99.9984	262.471	82.3796	262.423	83.7555	262.378	85.0723	262.98	75.5764	262.961	75.8345	262.94	76.086
17.7184	262.372	99.9706	262.376	99.9933	262.38	99.9984	262.471	82.3821	262.423	83.7491	262.377	85.0967	262.979	75.5835	262.96	75.8408	262.94	76.093
17.7375	262.372	99.9707	262.376	99.9934	262.38	99.9984	262.471	82.3837	262.423	83.759	262.376	85.1322	262.978	75.5873	262.959	75.8524	262.939	76.098
17.7566	262.372	99.9709	262.376	99.9934	262.38	99.9984	262.471	82.3741	262.423	83.7431	262.376	85.1276	262.979	75.5944	262.959	75.81	262.939	76.102
17.7756	262.372	99.971	262.376	99.9935	262.38	99.9984	262.472	82.3614	262.423	83.7496	262.376	85.1341	262.98	75.5888	262.96	75.8124	262.94	76.111
17.7947	262.372	99.9711	262.376	99.9935	262.38	99.9984	262.472	82.3468	262.422	83.7726	262.377	85.1017	262.98	75.5959	262.961	75.8138	262.94	76.121
17.8138	262.372	99.9712	262.376	99.9935	262.38	99.9984	262.472	82.3443	262.421	83.8102	262.378	85.082	262.978	75.6276	262.962	75.8102	262.94	76.128
17.8328	262.372	99.9713	262.376	99.9936	262.38	99.9985	262.472	82.344	262.421	83.8335	262.377	85.0919	262.976	75.6387	262.96	75.8443	262.939	76.132
17.8519	262.372	99.9714	262.376	99.9936	262.38	99.9985	262.473	82.3381	262.421	83.8302	262.377	85.0859	262.976	75.631	262.958	75.8526	262.939	76.131
17.871	262.371	99.9716	262.376	99.9936	262.38	99.9985	262.473	82.3311	262.421	83.8324	262.377	85.0946	262.977	75.6063	262.957	75.8584	262.939	76.129
17.8901	262.371	99.9717	262.376	99.9937	262.38	99.9985	262.473	82.3316	262.421	83.819	262.377	85.0976	262.978	75.5943	262.959	75.8338	262.939	76.129
17.9091	262.371	99.9718	262.376	99.9937	262.38	99.9985	262.473	82.3291	262.421	83.8298	262.377	85.0937	262.978	75.6155	262.961	75.8508	262.939	76.133
17.9282	262.371	99.9719	262.376	99.9937	262.38	99.9985	262.473	82.3272	262.421	83.8273	262.378	85.0771	262.978	75.6383	262.961	75.8705	262.938	76.144
17.9473	262.371	99.9721	262.376	99.9938	262.38	99.9985	262.473	82.3329	262.421	83.8226	262.378	85.0733	262.977	75.6534	262.958	75.9184	262.938	76.154
17.9664	262.371	99.9722	262.376	99.9938	262.38	99.9985	262.472	82.3606	262.421	83.8315	262.377	85.0955	262.976	75.6565	262.955	75.9191	262.937	76.155
17.9854	262.371	99.9723	262.376	99.9938	262.38	99.9985	262.472	82.3555	262.42	83.861	262.376	85.135	262.976	75.6447	262.956	75.9265	262.937	76.148
18.0045	262.371	99.9724	262.376	99.9939	262.38	99.9986	262.472	82.3581	262.419	83.8697	262.375	85.1779	262.976	75.6217	262.958	75.89	262.937	76.137
18.0236	262.371	99.9726	262.376	99.9939	262.38	99.9986	262.471	82.3726	262.419	83.8837	262.375	85.1771	262.977	75.6041	262.959	75.8901	262.937	76.123
18.0426	262.371	99.9727	262.376	99.9939	262.38	99.9986	262.472	82.3563	262.419	83.874	262.375	85.16	262.978	75.5966	262.958	75.9193	262.936	76.113
18.0617	262.371	99.9728	262.376	99.994	262.38	99.9986	262.472	82.3642	262.42	83.8628	262.377	85.1139	262.98	75.5877	262.955	75.9538	262.936	76.111
18.0808	262.371	99.9729	262.376	99.994	262.38	99.9986	262.472	82.3651	262.42	83.8452	262.377	85.0989	262.979	75.5967	262.954	75.9325	262.935	76.115
18.0999	262.371	99.973	262.376	99.994	262.38	99.9986	262.471	82.3788	262.42	83.8576	262.378	85.0824	262.978	75.6113	262.956	75.9088	262.936	76.115
18.1189	262.371	99.9731	262.376	99.9941	262.38	99.9986	262.47	82.3986	262.419	83.8676	262.377	85.1158	262.977	75.6219	262.957	75.8877	262.937	76.113
18.138	262.371	99.9732	262.376	99.9941	262.38	99.9986	262.471	82.3942	262.419	83.8831	262.376	85.1315	262.978	75.6	262.959	75.8942	262.937	76.105
18.1571	262.371	99.9733	262.376	99.9941	262.38	99.9986	262.471	82.3881	262.419	83.8725	262.375	85.1692	262.978	75.5774	262.959	75.9233	262.936	76.092
18.1762	262.371	99.9734	262.376	99.9942	262.38	99.9986	262.471	82.3877	262.419	83.8705	262.374	85.209	262.979	75.5552	262.956	75.9659	262.936	76.075
18.1952	262.371	99.9736	262.376	99.9942	262.38	99.9987	262.471	82.3882	262.419	83.8704	262.373	85.2237	262.98	75.5436	262.954	75.9802	262.935	76.061
18.2143	262.371	99.9737	262.376	99.9942	262.38	99.9987	262.47	82.3978	262.419	83.8651	262.374	85.1844	262.98	75.5394	262.954	75.9508	262.935	76.05
18.2334	262.371	99.9738	262.376	99.9943	262.38	99.9987	262.47	82.4073	262.419	83.8752	262.374	85.2015	262.98	75.5292	262.957	75.8981	262.936	76.044
18.2525	262.371	99.9739	262.376	99.9943	262.38	99.9987	262.47	82.4107	262.418	83.8963	262.374	85.205	262.981	75.5237	262.959	75.8664	262.937	76.039
18.2715	262.371	99.974	262.376	99.9943	262.38	99.9987	262.47	82.4212	262.419	83.8935	262.373	85.2112	262.982	75.5243	262.959	75.8829	262.938	76.04
18.2906	262.371	99.9741	262.376	99.9944	262.38	99.9987	262.47	82.4267	262.419	83.8927	262.372	85.2446	262.982	75.5185	262.959	75.8899	262.938	76.048
18.3097	262.371	99.9742	262.376	99.9944	262.38	99.9987	262.47	82.4257	262.419	83.8881	262.373	85.2376	262.98	75.5428	262.958	75.9401	262.938	76.055
18.3287	262.371	99.9743	262.376	99.9945	262.38	99.9987	262.469	82.4368	262.418	83.8958	262.373	85.2301	262.979	75.5688	262.958	75.9253	262.937	76.062
18.3478	262.371	99.9744	262.376	99.9945	262.38	99.9987	262.469	82.4537	262.418	83.907	262.373	85.2153	262.979	75.5594	262.956	75.9317	262.937	76.071
18.3669	262.371	99.9745	262.376	99.9945	262.38	99.9987	262.468	82.4575	262.418	83.9227	262.374	85.1998	262.979	75.5623	262.957	75.9207	262.937	76.077
18.386	262.371	99.9747	262.376	99.9945	262.38	99.9987	262.468	82.4781	262.417	83.9375	262.373	85.2173	262.979	75.5623	262.957	75.894	262.937	76.078
18.405	262.371	99.9748	262.376	99.9946	262.38	99.9988	262.468	82.4736	262.417	83.9364	262.373	85.2372	262.979	75.5733	262.959	75.8577	262.938	76.084
18.4241	262.371	99.9749	262.376	99.9946	262.38	99.9988	262.468	82.4732	262.417	83.9491	262.372	85.2612	262.979	75.5718	262.959	75.873	262.938	76.088
18.4432	262.371	99.975	262.376	99.9946	262.38	99.9988	262.468	82.475	262.417	83.9511	262.372	85.2706	262.979	75.5897	262.959	75.8537	262.938	76.093
18.4623	262.371	99.9751	262.376	99.9946	262.38	99.9988	262.468	82.4869	262.416	83.9628	262.372	85.2582	262.979	75.5833	262.959	75.8725	262.939	76.096
18.4813	262.371	99.9752	262.376	99.9947	262.38	99.9988	262.467	82.5072	262.416	83.9773	262.372	85.2573	262.979	75.5869	262.959	75.8536	262.939	76.101
18.5004	262.371	99.9753	262.376	99.9947	262.38	99.9988	262.466	82.518	262.415	83.9878	262.371	85.273	262.979	75.591	262.959	75.8617	262.939	76.105
18.5195	262.371	99.9754	262.376	99.9947	262.38	99.9988	262.466	82.5312	262.415	84.0003	262.371	85.2946	262.978	75.596	262.959	75.8468	262.939	76.109
18.5386	262.371	99.9755	262.376	99.9948	262.38	99.9988	262.466	82.534	262.414	84.0245	262.37	85.3189	262.977	75.6069	262.959	75.833	262.939	76.11
18.5576	262.371	99.9756	262.376	99.9948	262.38	99.9988	262.466	82.5313	262.414	84.0201	262.37	85.3287	262.977	75.6045	262.96	75.8322	262.94	76.107
18.5767	262.371	99.9757	262.376	99.9948	262.38	99.9988	262.466	82.5339	262.415	84.0171	262.371	85.3007	262.978	75.5906	262.961	75.8102	262.94	76.106
18.5958	262.371	99.9758	262.376	99.9949	262.38	99.9988	262.466	82.544	262.414	84.0325	262.371	85.29	262.979	75.5765	262.962	75.8147	262.941	76.107
18.6149	262.371	99.976	262.376	99.9949	262.38	99.9989	262.465	82.5491	262.414	84.0448	262.371	85.2964	262.979	75.5922	262.962	75.8176	262.941	76.108
18.6339	262.371	99.9761	262.376	99.9949	262.38	99.9989	262.465	82.5534	262.413	84.0588	262.37	85.3035	262.978	75.6097	262.961	75.8263	262.941	76.112
18.653	262.371	99.9762	262.376	99.995	262.38	99.9989	262.465	82.5651	262.413	84.0545	262.369	85.3369	262.977	75.613	262.961	75.7981	262.941	76.114
18.6721	262.371	99.9763	262.376	99.995	262.38	99.9989	262.465	82.5605	262.413	84.0613	262.369	85.3532	262.977	75.6067	262.963	75.788	262.941	76.112
18.6912	262.371	99.9764	262.376	99.995	262.38	99.9989	262.465	82.56	262.413	84.066	262.37	85.322	262.978	75.5909	262.964	75.7908	262.941	76.107
18.7102	262.371	99.9765	262.376	99.995	262.38	99.9989	262.465	82.5578	262.413	84.0672	262.371	85.2941	262.979	75.5806	262.961	75.8098	262.941	76.105
18.7293	262.371	99.9766	262.376	99.9951	262.38	99.9989	262.465	82.5494	262.413	84.0618	262.37	85.3145	262.98	75.5865	262.96	75.8221	262.941	76.105
18.7484	262.371	99.9767	262.376	99.9951	262.38	99.9989	262.465	82.5546	262.413	84.0642	262.369	85.3482	262.978	75.6031	262.96	75.8197	262.94	76.108
18.7674	262.371	99.9768	262.376	99.9951	262.38	99.9989	262.465	82.5586	262.413	84.062	262.369	85.3657	262.978	75.6041	262.961	75.8166	262.94	76.11
18.7865	262.371	99.9769	262.376	99.9952	262.38	99.9989	262.465	82.5706	262.413	84.0739	262.368	85.3673	262.978	75.6044	262.962	75.8035	262.941	76.114
18.8056	262.371	99.977	262.376	99.9952	262.38	99.9989	262.465	82.5756	262.412	84.1069	262.369	85.3497	262.978	75.5927	262.962	75.8029	262.941	76.117
18.8247	262.371	99.9771	262.376	99.9952	262.38	99.9989	262.464	82.5791	262.41	84.1435	262.37	85.3333	262.979	75.604	262.961	75.809	262.94	76.123
18.8437	262.371	99.9772	262.376	99.9952	262.38	99.9989	262.464	82.5962	262.41	84.1579	262.369	85.3422	262.979	75.6198	262.96	75.8393	262.94	76.134
18.8628	262.371	99.9773	262.376	99.9953	262.38	99.999	262.464	82.6052	262.409	84.1757	262.367	85.3993	262.979	75.6351	262.96	75.8409	262.94	76.152
18.8819	262.371	99.9774	262.376	99.9953	262.38	99.999	262.464	82.5833	262.41	84.1451	262.366	85.438	262.978	75.6596	262.96	75.8212	262.94	76.169
18.901	262.371	99.9775	262.376	99.9953	262.38	99.999	262.465	82.569	262.411	84.1203	262.366	85.4407	262.975	75.6828	262.961	75.8201	262.94	76.179
18.92	262.371	99.9776	262.376	99.9953	262.38	99.999	262.465	82.5676	262.412	84.0977	262.367	85.4278	262.974	75.6867	262.96	75.8262	262.94	76.179
18.9391	262.371	99.9776	262.376	99.9954	262.38	99.999	262.465	82.572	262.412	84.0856	262.367	85.4052	262.973	75.6727	262.96	75.8354	262.94	76.169
18.9582	262.371	99.9777	262.376	99.9954	262.38	99.999	262.464	82.5866	262.413	84.0716	262.367	85.4231	262.975	75.6339	262.96	75.8362	262.94	76.153
18.9773	262.371	99.9778	262.376	99.9954	262.38	99.999	262.464	82.5845	262.413	84.0656	262.366	85.4386	262.976	75.6102	262.961	75.8478	262.939	76.138
18.9963	262.371	99.9779	262.376	99.9954	262.38	99.999	262.464	82.5923	262.413	84.0648	262.367	85.4246	262.978	75.6033	262.96	75.8646	262.939	76.131
19.0154	262.371	99.978	262.376	99.9955	262.38	99.999	262.464	82.6061	262.413	84.0672	262.366	85.4472	262.979	75.6125	262.959	75.8746	262.939	76.136
19.0345	262.371	99.9781	262.376	99.9955	262.38	99.999	262.463	82.6232	262.412	84.0937	262.367	85.4177	262.979	75.634	262.959	75.8708	262.938	76.146
19.0535	262.371	99.9782	262.376	99.9955	262.38	99.999	262.463	82.6281	262.411	84.1191	262.367	85.4059	262.978	75.66	262.958	75.8671	262.938	76.157
19.0726	262.371	99.9783	262.376	99.9955	262.38	99.999	262.463	82.6178	262.411	84.1307	262.366	85.4428	262.978	75.6628	262.958	75.8667	262.939	76.167
19.0917	262.371	99.9784	262.376	99.9956	262.38	99.999	262.463	82.6061	262.411	84.1256	262.365	85.491	262.977	75.6565	262.96	75.8431	262.939	76.173
19.1108	262.371	99.9785	262.376	99.9956	262.38	99.999	262.464	82.5929	262.412	84.093	262.363	85.5254	262.976	75.6634	262.962	75.8335	262.939	76.169
19.1298	262.371	99.9786	262.376	99.9956	262.38	99.9991	262.464	82.5859	262.413	84.0743	262.363	85.5322	262.975	75.6621	262.961	75.8759	262.938	76.16
19.1489	262.371	99.9787	262.376	99.9956	262.38	99.9991	262.464	82.5848	262.412	84.0957	262.363	85.5236	262.976	75.6413	262.956	75.9398	262.937	76.149
19.168	262.371	99.9788	262.376	99.9957	262.38	99.9991	262.464	82.5851	262.411	84.1113	262.364	85.4922	262.977	75.6194	262.955	75.9566	262.937	76.136
19.1871	262.371	99.9789	262.376	99.9957	262.38	99.9991	262.464	82.5994	262.411	84.1263	262.365	85.4694	262.979	75.598	262.956	75.9188	262.936	76.126
19.2061	262.371	99.979	262.376	99.9957	262.38	99.9991	262.464	82.6039	262.411	84.136	262.366	85.4574	262.979	75.5996	262.957	75.8898	262.936	76.126
19.2252	262.371	99.9791	262.376	99.9957	262.38	99.9991	262.464	82.6012	262.411	84.1355	262.365	85.4818	262.979	75.6138	262.958	75.8817	262.937	76.137
19.2443	262.371	99.9791	262.376	99.9958	262.38	99.9991	262.463	82.6218	262.411	84.1214	262.364	85.5042	262.979	75.6422	262.957	75.8649	262.937	76.155
19.2633	262.371	99.9792	262.376	99.9958	262.38	99.9991	262.463	82.6239	262.411	84.1344	262.363	85.5515	262.977	75.6707	262.957	75.8508	262.938	76.171
19.2824	262.371	99.9793	262.376	99.9958	262.38	99.9991	262.463	82.6133	262.411	84.133	262.362	85.5627	262.976	75.6895	262.958	75.8317	262.939	76.182
19.3015	262.371	99.9794	262.376	99.9958	262.38	99.9991	262.463	82.6082	262.411	84.1386	262.362	85.5693	262.976	75.6801	262.961	75.8017	262.939	76.185
19.3206	262.371	99.9795	262.376	99.9959	262.38	99.9991	262.463	82.6082	262.41	84.1629	262.362	85.5579	262.976	75.6674	262.963	75.8075	262.94	76.183
19.3396	262.371	99.9796	262.376	99.9959	262.38	99.9991	262.463	82.6231	262.409	84.1784	262.363	85.5495	262.975	75.6577	262.962	75.8271	262.94	76.174
19.3587	262.371	99.9797	262.376	99.9959	262.38	99.9991	262.463	82.6298	262.409	84.1729	262.363	85.5293	262.976	75.6629	262.959	75.8568	262.939	76.164
19.3778	262.371	99.9798	262.376	99.9959	262.38	99.9991	262.462	82.6385	262.41	84.1648	262.363	85.5342	262.977	75.6408	262.957	75.9002	262.938	76.156
19.3969	262.371	99.9799	262.376	99.996	262.38	99.9991	262.462	82.6446	262.41	84.1697	262.363	85.5399	262.978	75.6301	262.958	75.8625	262.938	76.153
19.4159	262.371	99.9799	262.376	99.996	262.38	99.9992	262.462	82.6638	262.409	84.1795	262.363	85.5466	262.978	75.6301	262.959	75.8156	262.938	76.148
19.435	262.371	99.98	262.376	99.996	262.38	99.9992	262.461	82.6712	262.409	84.1986	262.363	85.5507	262.978	75.643	262.961	75.8018	262.939	76.149
19.4541	262.371	99.9801	262.376	99.996	262.38	99.9992	262.461	82.6769	262.408	84.2203	262.362	85.581	262.978	75.6367	262.96	75.8115	262.939	76.154
19.4732	262.371	99.9802	262.376	99.996	262.38	99.9992	262.461	82.6885	262.407	84.2422	262.361	85.5941	262.976	75.6442	262.959	75.8206	262.94	76.157
19.4922	262.371	99.9803	262.376	99.9961	262.38	99.9992	262.461	82.695	262.407	84.2399	262.362	85.5776	262.976	75.6564	262.96	75.8302	262.94	76.158
19.5113	262.371	99.9804	262.376	99.9961	262.38	99.9992	262.461	82.6882	262.407	84.2473	262.361	85.6012	262.977	75.6473	262.961	75.8005	262.94	76.157
19.5304	262.371	99.9804	262.376	99.9961	262.38	99.9992	262.461	82.6789	262.407	84.2396	262.361	85.6085	262.978	75.6448	262.961	75.8161	262.94	76.155
19.5495	262.37	99.9805	262.376	99.9961	262.38	99.9992	262.461	82.6816	262.408	84.2093	262.36	85.6324	262.978	75.6353	262.96	75.815	262.94	76.151
19.5685	262.37	99.9806	262.376	99.9962	262.38	99.9992	262.461	82.6914	262.408	84.2036	262.36	85.6365	262.977	75.63	262.96	75.8342	262.94	76.15
19.5876	262.37	99.9807	262.376	99.9962	262.38	99.9992	262.46	82.7	262.409	84.1885	262.36	85.6356	262.976	75.6402	262.959	75.8045	262.94	76.142
19.6067	262.37	99.9808	262.376	99.9962	262.38	99.9992	262.46	82.7016	262.409	84.1913	262.361	85.5977	262.977	75.6386	262.96	75.7884	262.94	76.133
19.6258	262.37	99.9808	262.376	99.9962	262.38	99.9992	262.46	82.7125	262.408	84.2037	262.362	85.5712	262.978	75.6058	262.962	75.7869	262.94	76.128
19.6448	262.37	99.9809	262.376	99.9962	262.38	99.9992	262.46	82.7134	262.408	84.21	262.362	85.5663	262.979	75.591	262.961	75.8172	262.94	76.122
19.6639	262.37	99.981	262.376	99.9963	262.38	99.9992	262.459	82.7278	262.408	84.2254	262.362	85.5794	262.98	75.6045	262.96	75.856	262.939	76.118
19.683	262.37	99.9811	262.376	99.9963	262.38	99.9992	262.459	82.7497	262.408	84.2243	262.361	85.5865	262.98	75.6114	262.959	75.8638	262.939	76.123
19.702	262.37	99.9812	262.376	99.9963	262.38	99.9992	262.458	82.7672	262.408	84.2113	262.361	85.5994	262.978	75.6194	262.958	75.859	262.938	76.13
19.7211	262.37	99.9813	262.376	99.9963	262.38	99.9992	262.458	82.7588	262.408	84.2157	262.361	85.603	262.977	75.6289	262.959	75.8328	262.938	76.13
19.7402	262.37	99.9813	262.376	99.9964	262.38	99.9992	262.459	82.7503	262.407	84.2416	262.361	85.5926	262.977	75.6256	262.96	75.8105	262.938	76.125
19.7593	262.37	99.9814	262.376	99.9964	262.38	99.9993	262.459	82.7473	262.407	84.2486	262.36	85.6163	262.978	75.6053	262.959	75.8259	262.939	76.119
19.7783	262.37	99.9815	262.376	99.9964	262.38	99.9993	262.458	82.7615	262.407	84.2636	262.36	85.6375	262.98	75.5863	262.959	75.8169	262.939	76.116
19.7974	262.37	99.9816	262.376	99.9964	262.38	99.9993	262.458	82.7705	262.406	84.2742	262.358	85.6803	262.98	75.5895	262.96	75.8201	262.939	76.116
19.8165	262.37	99.9817	262.376	99.9964	262.38	99.9993	262.457	82.7961	262.406	84.2754	262.358	85.6911	262.98	75.6113	262.96	75.848	262.939	76.124
19.8356	262.37	99.9817	262.376	99.9965	262.38	99.9993	262.457	82.8159	262.406	84.2931	262.358	85.6795	262.979	75.628	262.959	75.8585	262.939	76.137
19.8546	262.37	99.9818	262.376	99.9965	262.38	99.9993	262.457	82.8069	262.405	84.2977	262.359	85.6663	262.976	75.6455	262.959	75.884	262.938	76.143
19.8737	262.37	99.9819	262.376	99.9965	262.38	99.9993	262.457	82.8053	262.405	84.3171	262.359	85.6505	262.976	75.6496	262.959	75.88	262.938	76.142
19.8928	262.37	99.982	262.376	99.9965	262.38	99.9993	262.457	82.795	262.404	84.3364	262.36	85.6249	262.978	75.6202	262.957	75.8764	262.937	76.143
19.9119	262.37	99.9821	262.376	99.9965	262.38	99.9993	262.458	82.7796	262.404	84.3507	262.36	85.627	262.979	75.6092	262.957	75.8769	262.938	76.145
19.9309	262.37	99.9822	262.376	99.9966	262.38	99.9993	262.458	82.7636	262.403	84.3596	262.359	85.6511	262.98	75.6314	262.958	75.8577	262.938	76.15
19.95	262.37	99.9822	262.376	99.9966	262.38	99.9993	262.458	82.7831	262.403	84.3709	262.359	85.6652	262.979	75.6564	262.96	75.8547	262.938	76.162
19.9691	262.37	99.9823	262.376	99.9966	262.38	99.9993	262.457	82.8058	262.403	84.3681	262.358	85.6977	262.977	75.6713	262.96	75.874	262.938	76.174
19.9882	262.37	99.9824	262.376	99.9966	262.38	99.9993	262.457	82.8109	262.403	84.378	262.358	85.7094	262.976	75.6847	262.958	75.9054	262.937	76.181
20.0072	262.37	99.9825	262.376	99.9966	262.38	99.9993	262.456	82.8321	262.402	84.4042	262.357	85.7278	262.976	75.6687	262.955	75.9292	262.936	76.181
20.0263	262.37	99.9826	262.376	99.9967	262.38	99.9993	262.456	82.8412	262.401	84.4487	262.356	85.7421	262.976	75.6637	262.955	75.9116	262.936	76.175
20.0454	262.37	99.9826	262.376	99.9967	262.38	99.9993	262.456	82.8433	262.4	84.4811	262.356	85.7448	262.976	75.6551	262.957	75.8631	262.937	76.165
20.0644	262.37	99.9827	262.376	99.9967	262.38	99.9993	262.455	82.8513	262.4	84.475	262.356	85.7631	262.977	75.6432	262.959	75.8258	262.938	76.158
20.0835	262.37	99.9828	262.376	99.9967	262.38	99.9993	262.455	82.8572	262.4	84.4616	262.355	85.7806	262.977	75.6359	262.962	75.8326	262.939	76.151
20.1026	262.37	99.9829	262.376	99.9967	262.38	99.9993	262.456	82.8428	262.401	84.4498	262.355	85.7816	262.978	75.6339	262.96	75.9019	262.938	76.145
20.1217	262.37	99.983	262.376	99.9968	262.38	99.9993	262.456	82.8398	262.401	84.435	262.355	85.7815	262.978	75.6259	262.958	75.9558	262.937	76.142
20.1407	262.37	99.983	262.376	99.9968	262.38	99.9994	262.455	82.849	262.4	84.4527	262.355	85.7941	262.978	75.628	262.956	75.9519	262.936	76.141
20.1598	262.37	99.9831	262.376	99.9968	262.38	99.9994	262.455	82.8581	262.4	84.46	262.354	85.8078	262.978	75.6293	262.955	75.9544	262.936	76.142
20.1789	262.37	99.9832	262.376	99.9968	262.38	99.9994	262.455	82.8604	262.399	84.488	262.354	85.8263	262.978	75.6264	262.955	75.9066	262.936	76.144
20.1979	262.37	99.9832	262.376	99.9968	262.38	99.9994	262.455	82.8578	262.399	84.513	262.353	85.8527	262.977	75.6401	262.958	75.8753	262.937	76.144
20.217	262.37	99.9833	262.376	99.9968	262.38	99.9994	262.456	82.8454	262.398	84.5215	262.352	85.872	262.977	75.6346	262.96	75.8608	262.938	76.147
20.2361	262.37	99.9834	262.376	99.9969	262.38	99.9994	262.455	82.8485	262.398	84.5185	262.353	85.8594	262.977	75.6323	262.961	75.899	262.937	76.147
20.2552	262.37	99.9834	262.375	99.9969	262.38	99.9994	262.455	82.8551	262.398	84.5269	262.353	85.8508	262.977	75.642	262.957	75.958	262.937	76.144
20.2742	262.37	99.9835	262.375	99.9969	262.38	99.9994	262.455	82.8659	262.399	84.4831	262.353	85.8383	262.978	75.6288	262.954	75.9536	262.936	76.145
20.2933	262.37	99.9836	262.375	99.9969	262.38	99.9994	262.454	82.8798	262.4	84.4645	262.353	85.8624	262.978	75.6242	262.954	75.9368	262.935	76.147
20.3124	262.37	99.9836	262.375	99.9969	262.38	99.9994	262.454	82.8954	262.401	84.4462	262.352	85.8965	262.978	75.6399	262.956	75.8965	262.936	76.147
20.3315	262.37	99.9837	262.375	99.997	262.38	99.9994	262.453	82.9121	262.401	84.4425	262.351	85.9025	262.978	75.6397	262.958	75.8687	262.937	76.15
20.3505	262.37	99.9838	262.375	99.997	262.38	99.9994	262.453	82.9344	262.4	84.473	262.351	85.9125	262.977	75.6442	262.959	75.8699	262.937	76.151
20.3696	262.37	99.9838	262.375	99.997	262.38	99.9994	262.453	82.9354	262.399	84.5099	262.351	85.906	262.977	75.6433	262.959	75.8957	262.937	76.148
20.3887	262.37	99.9839	262.375	99.997	262.38	99.9994	262.453	82.9364	262.398	84.5205	262.351	85.9212	262.978	75.6297	262.957	75.9079	262.937	76.144
20.4078	262.37	99.984	262.375	99.997	262.38	99.9994	262.453	82.9343	262.398	84.5309	262.351	85.9182	262.978	75.6228	262.955	75.9237	262.937	76.139
20.4268	262.37	99.984	262.375	99.997	262.38	99.9994	262.453	82.9234	262.398	84.5235	262.351	85.9132	262.978	75.6194	262.958	75.913	262.937	76.133
20.4459	262.37	99.9841	262.375	99.9971	262.38	99.9994	262.453	82.931	262.399	84.4988	262.351	85.9139	262.977	75.621	262.96	75.8795	262.937	76.129
20.465	262.37	99.9842	262.375	99.9971	262.38	99.9994	262.453	82.9251	262.399	84.4909	262.351	85.9194	262.978	75.6131	262.959	75.9082	262.937	76.122
20.4841	262.37	99.9842	262.375	99.9971	262.38	99.9994	262.452	82.9428	262.399	84.4908	262.352	85.8941	262.979	75.6085	262.956	75.9536	262.936	76.118
20.5031	262.37	99.9843	262.375	99.9971	262.38	99.9994	262.452	82.9654	262.399	84.4999	262.353	85.8664	262.979	75.5898	262.954	75.9451	262.936	76.116
20.5222	262.37	99.9844	262.375	99.9971	262.38	99.9994	262.45	82.9984	262.399	84.501	262.353	85.8517	262.98	75.6005	262.955	75.9312	262.936	76.117
20.5413	262.37	99.9844	262.375	99.9971	262.38	99.9994	262.45	83.0058	262.399	84.5085	262.354	85.8345	262.98	75.6073	262.957	75.8852	262.937	76.122
20.5603	262.37	99.9845	262.375	99.9972	262.38	99.9995	262.451	82.9979	262.399	84.5083	262.353	85.8574	262.979	75.6219	262.96	75.8543	262.938	76.129
20.5794	262.37	99.9846	262.375	99.9972	262.38	99.9995	262.451	82.9885	262.397	84.5461	262.352	85.8671	262.978	75.6333	262.96	75.857	262.938	76.132
20.5985	262.37	99.9846	262.375	99.9972	262.38	99.9995	262.451	82.9846	262.397	84.5506	262.353	85.8656	262.978	75.6241	262.958	75.8864	262.939	76.133
20.6176	262.37	99.9847	262.375	99.9972	262.38	99.9995	262.451	82.9919	262.397	84.5713	262.353	85.8532	262.978	75.6145	262.958	75.8921	262.938	76.128
20.6366	262.37	99.9848	262.375	99.9972	262.38	99.9995	262.45	83.0044	262.396	84.585	262.353	85.8473	262.978	75.6122	262.959	75.8905	262.938	76.118
20.6557	262.37	99.9848	262.375	99.9972	262.38	99.9995	262.45	83.0211	262.396	84.589	262.353	85.8622	262.979	75.5966	262.96	75.8535	262.938	76.112
20.6748	262.37	99.9849	262.375	99.9972	262.38	99.9995	262.45	83.028	262.396	84.5813	262.352	85.8843	262.98	75.5823	262.959	75.8285	262.939	76.108
20.6939	262.37	99.9849	262.375	99.9973	262.38	99.9995	262.449	83.0289	262.396	84.5916	262.352	85.8719	262.979	75.593	262.959	75.8341	262.939	76.103
20.7129	262.37	99.985	262.375	99.9973	262.38	99.9995	262.45	83.0196	262.396	84.5911	262.352	85.8832	262.979	75.5978	262.96	75.8002	262.94	76.102
20.732	262.37	99.9851	262.375	99.9973	262.38	99.9995	262.45	83.0061	262.395	84.61	262.352	85.8896	262.98	75.5853	262.962	75.8074	262.94	76.106
20.7511	262.37	99.9851	262.375	99.9973	262.38	99.9995	262.45	83.0037	262.395	84.6089	262.351	85.901	262.979	75.5925	262.962	75.8112	262.94	76.108
20.7702	262.37	99.9852	262.375	99.9973	262.38	99.9995	262.451	82.9967	262.395	84.6068	262.35	85.946	262.979	75.6036	262.961	75.8358	262.94	76.11
20.7892	262.37	99.9852	262.375	99.9973	262.38	99.9995	262.45	83.0077	262.396	84.5866	262.349	85.9758	262.98	75.6006	262.959	75.8602	262.939	76.116
20.8083	262.37	99.9853	262.375	99.9974	262.38	99.9995	262.45	83.0123	262.397	84.5755	262.349	85.9644	262.98	75.6076	262.958	75.8491	262.939	76.125
20.8274	262.37	99.9854	262.375	99.9974	262.38	99.9995	262.45	83.0216	262.397	84.5603	262.35	85.9569	262.979	75.6183	262.958	75.8251	262.939	76.13
20.8465	262.37	99.9854	262.375	99.9974	262.38	99.9995	262.45	83.0251	262.397	84.5654	262.35	85.9534	262.977	75.6335	262.961	75.8064	262.94	76.132
20.8655	262.37	99.9855	262.375	99.9974	262.38	99.9995	262.45	83.0183	262.396	84.5761	262.35	85.9365	262.976	75.6282	262.962	75.8049	262.94	76.13
20.8846	262.37	99.9856	262.375	99.9974	262.38	99.9995	262.45	83.0188	262.396	84.5924	262.35	85.9329	262.977	75.6115	262.961	75.8596	262.939	76.123
20.9037	262.37	99.9857	262.375	99.9974	262.38	99.9995	262.449	83.0316	262.395	84.6122	262.349	85.9619	262.979	75.6013	262.958	75.8946	262.938	76.115
20.9228	262.37	99.9857	262.375	99.9974	262.38	99.9995	262.449	83.0387	262.395	84.6311	262.349	85.9743	262.981	75.5815	262.957	75.9017	262.937	76.113
20.9418	262.37	99.9858	262.375	99.9975	262.38	99.9995	262.449	83.0383	262.395	84.6327	262.348	85.9951	262.981	75.5921	262.956	75.8886	262.937	76.115
20.9609	262.37	99.9858	262.375	99.9975	262.38	99.9995	262.449	83.0348	262.394	84.639	262.348	85.9949	262.979	75.6182	262.958	75.8446	262.938	76.116
20.98	262.37	99.9859	262.375	99.9975	262.38	99.9995	262.449	83.0404	262.395	84.6217	262.348	85.9926	262.979	75.6202	262.96	75.8299	262.939	76.118
20.999	262.37	99.9859	262.375	99.9975	262.38	99.9995	262.449	83.0467	262.396	84.5902	262.348	85.9947	262.978	75.6088	262.961	75.8404	262.939	76.113
21.0181	262.37	99.986	262.375	99.9975	262.38	99.9995	262.448	83.0625	262.396	84.5973	262.349	85.9829	262.979	75.5924	262.96	75.8591	262.939	76.105
21.0372	262.37	99.9861	262.375	99.9975	262.38	99.9995	262.449	83.0561	262.396	84.6007	262.348	85.9953	262.981	75.5636	262.959	75.8706	262.939	76.1
21.0563	262.37	99.9861	262.375	99.9975	262.38	99.9995	262.449	83.0452	262.395	84.6217	262.348	86.0118	262.981	75.5783	262.958	75.8714	262.939	76.101
21.0753	262.37	99.9862	262.375	99.9976	262.38	99.9995	262.449	83.0366	262.395	84.616	262.347	86.0437	262.981	75.5958	262.959	75.8619	262.939	76.108
21.0944	262.37	99.9862	262.375	99.9976	262.38	99.9995	262.45	83.0247	262.395	84.6207	262.346	86.0587	262.98	75.6167	262.96	75.8336	262.939	76.124
21.1135	262.37	99.9863	262.375	99.9976	262.38	99.9996	262.45	83.0171	262.394	84.6426	262.346	86.056	262.979	75.6268	262.96	75.8293	262.939	76.138
21.1326	262.37	99.9864	262.375	99.9976	262.38	99.9996	262.45	83.017	262.394	84.641	262.347	86.0416	262.977	75.6447	262.959	75.8344	262.94	76.145
21.1516	262.37	99.9864	262.375	99.9976	262.38	99.9996	262.449	83.0305	262.394	84.654	262.346	86.0649	262.977	75.6483	262.96	75.832	262.94	76.144
21.1707	262.37	99.9865	262.375	99.9976	262.38	99.9996	262.449	83.0573	262.393	84.6747	262.345	86.0983	262.976	75.6311	262.961	75.8452	262.939	76.137
21.1898	262.37	99.9865	262.375	99.9976	262.38	99.9996	262.448	83.0608	262.394	84.6685	262.345	86.1026	262.977	75.6107	262.961	75.8551	262.939	76.123
21.2089	262.37	99.9866	262.375	99.9976	262.38	99.9996	262.448	83.0576	262.393	84.6909	262.346	86.0789	262.978	75.589	262.959	75.8884	262.938	76.108
21.2279	262.37	99.9866	262.375	99.9977	262.38	99.9996	262.449	83.0539	262.392	84.7008	262.346	86.0738	262.979	75.5744	262.956	75.9096	262.938	76.103
21.247	262.37	99.9867	262.375	99.9977	262.38	99.9996	262.449	83.047	262.392	84.7114	262.346	86.0672	262.98	75.5771	262.957	75.8877	262.938	76.106
21.2661	262.37	99.9867	262.375	99.9977	262.38	99.9996	262.449	83.0524	262.391	84.7324	262.346	86.078	262.98	75.605	262.959	75.8539	262.938	76.118
21.2851	262.37	99.9868	262.375	99.9977	262.38	99.9996	262.449	83.0496	262.392	84.7093	262.345	86.0869	262.98	75.6246	262.96	75.8289	262.939	76.139
21.3042	262.37	99.9868	262.375	99.9977	262.38	99.9996	262.448	83.0641	262.393	84.6926	262.345	86.0899	262.98	75.6472	262.96	75.8137	262.939	76.167
21.3233	262.37	99.9869	262.375	99.9977	262.38	99.9996	262.448	83.0779	262.393	84.6972	262.345	86.0884	262.978	75.6834	262.96	75.816	262.94	76.192
21.3424	262.37	99.9869	262.375	99.9977	262.38	99.9996	262.448	83.0841	262.392	84.7011	262.345	86.0877	262.976	75.7145	262.961	75.8313	262.94	76.209
21.3614	262.37	99.987	262.375	99.9978	262.38	99.9996	262.447	83.088	262.393	84.6915	262.345	86.1044	262.973	75.7292	262.961	75.8379	262.94	76.215
21.3805	262.37	99.9871	262.375	99.9978	262.38	99.9996	262.448	83.0846	262.393	84.6907	262.344	86.129	262.973	75.7101	262.962	75.8402	262.939	76.209
21.3996	262.37	99.9871	262.375	99.9978	262.38	99.9996	262.448	83.0773	262.393	84.682	262.343	86.1601	262.975	75.6777	262.959	75.8638	262.938	76.197
21.4187	262.37	99.9872	262.375	99.9978	262.38	99.9996	262.448	83.0766	262.392	84.7143	262.343	86.1643	262.977	75.6526	262.956	75.8795	262.938	76.187
21.4377	262.37	99.9872	262.375	99.9978	262.38	99.9996	262.447	83.0902	262.391	84.7356	262.343	86.1572	262.978	75.6538	262.957	75.871	262.938	76.186
21.4568	262.37	99.9873	262.375	99.9978	262.38	99.9996	262.447	83.0991	262.39	84.7683	262.343	86.1661	262.977	75.6798	262.959	75.8169	262.938	76.193
21.4759	262.37	99.9873	262.375	99.9978	262.38	99.9996	262.447	83.1162	262.389	84.7998	262.343	86.1629	262.976	75.7059	262.961	75.8034	262.939	76.205
21.4949	262.37	99.9874	262.375	99.9978	262.38	99.9996	262.446	83.1304	262.389	84.8066	262.343	86.1714	262.975	75.7151	262.962	75.8354	262.939	76.215
21.514	262.37	99.9874	262.375	99.9979	262.38	99.9996	262.447	83.1144	262.39	84.7918	262.343	86.1665	262.975	75.7099	262.959	75.8891	262.938	76.219
21.5331	262.37	99.9875	262.375	99.9979	262.38	99.9996	262.446	83.1255	262.39	84.7795	262.344	86.1464	262.976	75.7041	262.955	75.9055	262.937	76.216
21.5522	262.37	99.9876	262.375	99.9979	262.38	99.9996	262.446	83.1343	262.39	84.7767	262.343	86.1545	262.976	75.6997	262.955	75.8998	262.937	76.211
21.5712	262.37	99.9876	262.375	99.9979	262.38	99.9996	262.446	83.1321	262.39	84.7837	262.343	86.1738	262.976	75.6927	262.957	75.8662	262.937	76.205
21.5903	262.37	99.9877	262.375	99.9979	262.38	99.9996	262.446	83.1466	262.389	84.8239	262.342	86.187	262.975	75.6903	262.96	75.8375	262.937	76.195
21.6094	262.37	99.9877	262.375	99.9979	262.38	99.9996	262.445	83.149	262.388	84.8432	262.342	86.2044	262.975	75.6805	262.96	75.8316	262.938	76.182
21.6285	262.37	99.9878	262.375	99.9979	262.38	99.9996	262.446	83.1351	262.387	84.8581	262.341	86.2184	262.977	75.6511	262.958	75.868	262.938	76.174
21.6475	262.37	99.9878	262.375	99.9979	262.38	99.9996	262.446	83.1313	262.388	84.8395	262.341	86.2261	262.979	75.6361	262.956	75.8894	262.938	76.167
21.6666	262.37	99.9879	262.375	99.9979	262.38	99.9996	262.445	83.1556	262.389	84.8222	262.342	86.2007	262.979	75.6502	262.957	75.842	262.938	76.166
21.6857	262.37	99.9879	262.375	99.998	262.38	99.9996	262.444	83.1907	262.389	84.8161	262.342	86.2093	262.979	75.6583	262.96	75.8151	262.938	76.17
21.7048	262.37	99.988	262.375	99.998	262.38	99.9996	262.443	83.2138	262.389	84.812	262.341	86.2151	262.977	75.6727	262.961	75.8123	262.939	76.174
21.7238	262.37	99.988	262.375	99.998	262.38	99.9996	262.443	83.217	262.388	84.8285	262.341	86.2364	262.976	75.6737	262.96	75.8266	262.939	76.171
21.7429	262.37	99.9881	262.375	99.998	262.38	99.9996	262.443	83.2302	262.388	84.8463	262.341	86.2357	262.977	75.6572	262.959	75.8532	262.939	76.165
21.762	262.37	99.9882	262.375	99.998	262.38	99.9996	262.443	83.2229	262.387	84.8646	262.341	86.2393	262.978	75.6323	262.959	75.8358	262.939	76.157
21.7811	262.37	99.9882	262.375	99.998	262.38	99.9996	262.443	83.2151	262.388	84.8541	262.341	86.2234	262.979	75.6319	262.959	75.8267	262.939	76.149
21.8001	262.37	99.9882	262.375	99.998	262.38	99.9997	262.443	83.2123	262.388	84.8461	262.341	86.2365	262.979	75.6298	262.961	75.8109	262.939	76.146
21.8192	262.37	99.9883	262.375	99.998	262.38	99.9997	262.444	83.2076	262.387	84.8594	262.34	86.2545	262.977	75.6347	262.961	75.8054	262.94	76.146
21.8383	262.37	99.9883	262.375	99.9981	262.38	99.9997	262.444	83.2043	262.387	84.874	262.34	86.2594	262.977	75.6414	262.96	75.8306	262.94	76.143
21.8574	262.37	99.9884	262.375	99.9981	262.38	99.9997	262.444	83.1992	262.386	84.9045	262.339	86.2868	262.977	75.6302	262.96	75.824	262.939	76.139
21.8764	262.37	99.9884	262.375	99.9981	262.38	99.9997	262.444	83.2006	262.385	84.9335	262.339	86.2939	262.979	75.6178	262.96	75.8411	262.939	76.136
21.8955	262.37	99.9885	262.375	99.9981	262.38	99.9997	262.443	83.2186	262.384	84.9656	262.338	86.3069	262.979	75.6132	262.959	75.8517	262.939	76.134
21.9146	262.37	99.9885	262.375	99.9981	262.38	99.9997	262.443	83.2291	262.384	84.9664	262.338	86.3281	262.98	75.6185	262.958	75.8631	262.939	76.136
21.9336	262.37	99.9886	262.375	99.9981	262.38	99.9997	262.443	83.2377	262.384	84.9593	262.338	86.3127	262.979	75.6309	262.959	75.8628	262.939	76.14
21.9527	262.37	99.9886	262.375	99.9981	262.38	99.9997	262.442	83.2412	262.385	84.9398	262.339	86.3006	262.978	75.6388	262.96	75.8736	262.939	76.146
21.9718	262.37	99.9887	262.375	99.9981	262.38	99.9997	262.442	83.2411	262.385	84.9447	262.339	86.2956	262.979	75.6383	262.96	75.9021	262.938	76.149
21.9909	262.37	99.9887	262.375	99.9981	262.38	99.9997	262.443	83.2342	262.384	84.9618	262.339	86.2894	262.979	75.6426	262.958	75.9512	262.937	76.154
22.0099	262.37	99.9888	262.375	99.9982	262.38	99.9997	262.443	83.2152	262.384	84.9592	262.339	86.2856	262.979	75.6373	262.955	75.9818	262.936	76.156
22.029	262.37	99.9888	262.375	99.9982	262.38	99.9997	262.443	83.2105	262.384	84.9667	262.339	86.2808	262.978	75.6522	262.953	75.9685	262.935	76.158
22.0481	262.37	99.9889	262.375	99.9982	262.38	99.9997	262.443	83.2347	262.384	84.9757	262.339	86.2823	262.977	75.6484	262.954	75.9318	262.935	76.156
22.0672	262.37	99.9889	262.375	99.9982	262.38	99.9997	262.442	83.2431	262.384	84.9773	262.34	86.2706	262.976	75.6507	262.957	75.8915	262.936	76.15
22.0862	262.37	99.989	262.375	99.9982	262.38	99.9997	262.442	83.2645	262.382	85.0208	262.34	86.2715	262.977	75.631	262.96	75.872	262.937	76.141
22.1053	262.37	99.989	262.375	99.9982	262.38	99.9997	262.441	83.275	262.381	85.0582	262.339	86.2906	262.978	75.6078	262.959	75.9073	262.937	76.134
22.1244	262.37	99.989	262.375	99.9982	262.38	99.9997	262.441	83.2736	262.381	85.0587	262.339	86.2906	262.98	75.6058	262.957	75.952	262.936	76.133
22.1435	262.37	99.9891	262.375	99.9982	262.38	99.9997	262.441	83.2753	262.381	85.0512	262.339	86.2974	262.98	75.6161	262.955	75.9631	262.936	76.137
22.1625	262.37	99.9891	262.375	99.9982	262.38	99.9997	262.441	83.2756	262.381	85.0432	262.339	86.3017	262.979	75.6441	262.955	75.9658	262.936	76.152
22.1816	262.37	99.9892	262.375	99.9982	262.38	99.9997	262.441	83.2873	262.382	85.0336	262.338	86.3194	262.979	75.6527	262.957	75.9271	262.936	76.169
22.2007	262.37	99.9892	262.375	99.9983	262.38	99.9997	262.44	83.3067	262.382	85.0117	262.338	86.3281	262.977	75.6807	262.959	75.9189	262.936	76.179
22.2197	262.37	99.9893	262.375	99.9983	262.38	99.9997	262.44	83.3232	262.382	85.025	262.338	86.3203	262.976	75.6901	262.958	75.9468	262.936	76.179
22.2388	262.37	99.9893	262.375	99.9983	262.38	99.9997	262.44	83.3314	262.382	85.0213	262.338	86.3303	262.977	75.6702	262.956	75.9413	262.936	76.176
22.2579	262.37	99.9894	262.375	99.9983	262.38	99.9997	262.44	83.3285	262.382	85.0162	262.338	86.3236	262.978	75.6412	262.955	75.9457	262.936	76.17
22.277	262.37	99.9894	262.375	99.9983	262.38	99.9997	262.44	83.3281	262.382	85.0207	262.338	86.3077	262.978	75.638	262.955	75.9201	262.936	76.164
22.296	262.369	99.9895	262.375	99.9983	262.38	99.9997	262.44	83.3203	262.382	85.0141	262.338	86.3212	262.978	75.6528	262.957	75.894	262.937	76.159
22.3151	262.369	99.9895	262.375	99.9983	262.38	99.9997	262.44	83.309	262.382	85.0128	262.338	86.3168	262.976	75.6595	262.959	75.86	262.938	76.156
22.3342	262.369	99.9895	262.375	99.9983	262.38	99.9997	262.44	83.3062	262.383	85.0049	262.337	86.3583	262.977	75.6447	262.961	75.8535	262.939	76.15
22.3533	262.369	99.9896	262.375	99.9983	262.38	99.9997	262.44	83.305	262.383	84.9977	262.336	86.3946	262.978	75.6238	262.961	75.8947	262.938	76.142
22.3723	262.369	99.9896	262.375	99.9983	262.38	99.9997	262.44	83.3091	262.383	84.9963	262.334	86.4505	262.978	75.6091	262.958	75.964	262.937	76.133
22.3914	262.369	99.9897	262.375	99.9984	262.38	99.9997	262.44	83.3237	262.383	85.0025	262.333	86.4796	262.978	75.6144	262.955	75.9959	262.936	76.13
22.4105	262.369	99.9897	262.375	99.9984	262.38	99.9997	262.44	83.3203	262.382	85.0286	262.333	86.4767	262.979	75.6152	262.955	75.9797	262.936	76.133
22.4295	262.369	99.9898	262.375	99.9984	262.38	99.9997	262.44	83.3257	262.382	85.0374	262.334	86.4521	262.98	75.6275	262.956	75.9415	262.936	76.14
22.4486	262.369	99.9898	262.375	99.9984	262.38	99.9997	262.439	83.3361	262.381	85.0552	262.335	86.4285	262.979	75.6383	262.957	75.9084	262.936	76.149
22.4677	262.369	99.9899	262.375	99.9984	262.38	99.9997	262.439	83.3339	262.38	85.0847	262.335	86.4307	262.978	75.6457	262.958	75.8848	262.937	76.161
22.4868	262.369	99.9899	262.375	99.9984	262.38	99.9997	262.439	83.3484	262.38	85.1043	262.334	86.4529	262.978	75.6609	262.958	75.8763	262.938	76.17
22.5058	262.369	99.9899	262.375	99.9984	262.38	99.9997	262.439	83.3408	262.38	85.0931	262.334	86.4557	262.977	75.6707	262.959	75.8771	262.938	76.178
22.5249	262.369	99.99	262.375	99.9984	262.38	99.9997	262.439	83.3447	262.38	85.0848	262.332	86.496	262.976	75.6771	262.96	75.8717	262.938	76.179
22.544	262.369	99.99	262.375	99.9984	262.38	99.9997	262.439	83.3342	262.382	85.0317	262.332	86.5241	262.977	75.6744	262.959	75.895	262.938	76.179
22.5631	262.369	99.9901	262.375	99.9984	262.38	99.9997	262.44	83.3196	262.383	85.0109	262.331	86.5533	262.978	75.6545	262.958	75.9139	262.938	76.18
22.5821	262.369	99.9901	262.375	99.9984	262.38	99.9997	262.441	83.2968	262.383	85.0002	262.331	86.5374	262.978	75.6585	262.957	75.8957	262.938	76.182
22.6012	262.369	99.9901	262.375	99.9985	262.38	99.9997	262.44	83.3081	262.382	85.0238	262.331	86.5395	262.976	75.676	262.958	75.9096	262.938	76.181
22.6203	262.369	99.9902	262.375	99.9985	262.38	99.9997	262.439	83.3429	262.381	85.052	262.33	86.5595	262.976	75.6877	262.958	75.8803	262.938	76.181
22.6394	262.369	99.9902	262.375	99.9985	262.38	99.9997	262.439	83.3479	262.38	85.0763	262.331	86.5353	262.976	75.6679	262.96	75.8959	262.938	76.178
22.6584	262.369	99.9903	262.375	99.9985	262.38	99.9997	262.439	83.3572	262.38	85.1028	262.331	86.5276	262.978	75.6542	262.959	75.9282	262.937	76.173
22.6775	262.369	99.9903	262.375	99.9985	262.38	99.9997	262.438	83.3656	262.38	85.0975	262.332	86.526	262.978	75.6436	262.957	75.9652	262.937	76.172
22.6966	262.369	99.9904	262.375	99.9985	262.38	99.9997	262.438	83.3877	262.38	85.0918	262.332	86.5212	262.978	75.6536	262.955	75.9501	262.936	76.174
22.7157	262.369	99.9904	262.375	99.9985	262.38	99.9998	262.438	83.3858	262.38	85.0922	262.331	86.5447	262.977	75.6796	262.955	75.9386	262.936	76.179
22.7347	262.369	99.9904	262.375	99.9985	262.38	99.9998	262.438	83.3818	262.381	85.0709	262.331	86.5533	262.977	75.6771	262.956	75.8954	262.936	76.186
22.7538	262.369	99.9905	262.375	99.9985	262.38	99.9998	262.438	83.3656	262.38	85.0749	262.33	86.5732	262.977	75.6798	262.958	75.8684	262.937	76.193
22.7729	262.369	99.9905	262.375	99.9985	262.38	99.9998	262.438	83.3648	262.381	85.0613	262.33	86.579	262.976	75.6804	262.96	75.8629	262.938	76.196
22.7919	262.369	99.9906	262.375	99.9985	262.38	99.9998	262.438	83.3637	262.38	85.0849	262.329	86.6097	262.976	75.6887	262.96	75.8716	262.938	76.197
22.811	262.369	99.9906	262.375	99.9986	262.38	99.9998	262.438	83.3765	262.38	85.084	262.329	86.6006	262.976	75.693	262.959	75.89	262.939	76.195
22.8301	262.369	99.9906	262.375	99.9986	262.38	99.9998	262.437	83.3933	262.38	85.0964	262.329	86.5892	262.977	75.6836	262.958	75.9112	262.939	76.197
22.8492	262.369	99.9907	262.375	99.9986	262.38	99.9998	262.436	83.4241	262.38	85.0927	262.33	86.5691	262.977	75.6689	262.959	75.8851	262.939	76.199
22.8682	262.369	99.9907	262.375	99.9986	262.38	99.9998	262.436	83.4361	262.379	85.1155	262.331	86.5416	262.976	75.6906	262.96	75.8673	262.939	76.197
22.8873	262.369	99.9908	262.375	99.9986	262.38	99.9998	262.436	83.4366	262.379	85.1292	262.33	86.565	262.975	75.6973	262.96	75.8408	262.939	76.195
22.9064	262.369	99.9908	262.375	99.9986	262.38	99.9998	262.437	83.4229	262.378	85.1409	262.33	86.5828	262.975	75.6836	262.96	75.8152	262.939	76.192
22.9255	262.369	99.9909	262.375	99.9986	262.38	99.9998	262.437	83.4166	262.379	85.1165	262.328	86.6214	262.976	75.6732	262.96	75.8109	262.94	76.182
22.9445	262.369	99.9909	262.375	99.9986	262.38	99.9998	262.437	83.4134	262.38	85.1002	262.328	86.6317	262.977	75.654	262.961	75.7734	262.941	76.17
22.9636	262.369	99.9909	262.375	99.9986	262.38	99.9998	262.437	83.4034	262.38	85.0768	262.328	86.6422	262.977	75.6433	262.963	75.7473	262.942	76.16
22.9827	262.369	99.991	262.375	99.9986	262.38	99.9998	262.437	83.4214	262.38	85.0798	262.327	86.6525	262.977	75.637	262.964	75.7359	262.942	76.15
23.0018	262.369	99.991	262.375	99.9986	262.38	99.9998	262.436	83.433	262.38	85.0911	262.327	86.6677	262.978	75.6337	262.964	75.7651	262.943	76.143
23.0208	262.369	99.9911	262.375	99.9986	262.38	99.9998	262.436	83.4343	262.379	85.1079	262.327	86.6562	262.979	75.6218	262.963	75.7619	262.943	76.14
23.0399	262.369	99.9911	262.375	99.9986	262.38	99.9998	262.436	83.4369	262.379	85.1241	262.328	86.6497	262.979	75.6218	262.963	75.76	262.942	76.137
23.059	262.369	99.9911	262.375	99.9987	262.38	99.9998	262.436	83.4455	262.379	85.1359	262.328	86.6375	262.979	75.6246	262.962	75.7596	262.942	76.132
23.0781	262.369	99.9912	262.375	99.9987	262.38	99.9998	262.436	83.4518	262.378	85.1505	262.327	86.6673	262.978	75.6214	262.963	75.7322	262.943	76.129
23.0971	262.369	99.9912	262.375	99.9987	262.38	99.9998	262.436	83.454	262.378	85.1544	262.326	86.6858	262.979	75.6092	262.964	75.7396	262.943	76.126
23.1162	262.369	99.9912	262.375	99.9987	262.38	99.9998	262.435	83.4569	262.378	85.1451	262.326	86.685	262.978	75.6091	262.965	75.7459	262.943	76.122
23.1353	262.369	99.9913	262.375	99.9987	262.38	99.9998	262.436	83.4522	262.378	85.142	262.326	86.6947	262.979	75.6086	262.964	75.7752	262.942	76.117
23.1543	262.369	99.9913	262.375	99.9987	262.38	99.9998	262.436	83.448	262.379	85.1278	262.326	86.6911	262.979	75.6025	262.962	75.8204	262.941	76.114
23.1734	262.369	99.9914	262.375	99.9987	262.38	99.9998	262.435	83.4555	262.379	85.1148	262.327	86.6792	262.979	75.5948	262.959	75.839	262.94	76.115
23.1925	262.369	99.9914	262.375	99.9987	262.38	99.9998	262.435	83.4726	262.379	85.1263	262.326	86.6881	262.98	75.595	262.959	75.8212	262.94	76.115
23.2116	262.369	99.9914	262.375	99.9987	262.38	99.9998	262.435	83.4792	262.379	85.1329	262.326	86.7067	262.979	75.6132	262.96	75.7995	262.94	76.117
23.2306	262.369	99.9915	262.375	99.9987	262.38	99.9998	262.434	83.4957	262.378	85.1395	262.326	86.6998	262.979	75.6083	262.962	75.7845	262.94	76.122
23.2497	262.369	99.9915	262.375	99.9987	262.38	99.9998	262.434	83.5133	262.378	85.1424	262.326	86.7045	262.978	75.6118	262.962	75.8156	262.94	76.125
23.2688	262.369	99.9915	262.375	99.9987	262.38	99.9998	262.434	83.5106	262.378	85.1363	262.326	86.7078	262.977	75.6202	262.96	75.8635	262.939	76.123
23.2879	262.369	99.9916	262.375	99.9987	262.38	99.9998	262.434	83.5049	262.379	85.1173	262.326	86.6971	262.978	75.6131	262.958	75.9178	262.938	76.119
23.3069	262.369	99.9916	262.375	99.9988	262.38	99.9998	262.434	83.4901	262.379	85.118	262.326	86.6998	262.979	75.6025	262.956	75.9353	262.936	76.114
23.326	262.369	99.9917	262.375	99.9988	262.38	99.9998	262.435	83.4767	262.379	85.1147	262.325	86.7458	262.98	75.5888	262.955	75.94	262.935	76.112
23.3451	262.369	99.9917	262.375	99.9988	262.38	99.9998	262.434	83.4928	262.379	85.1209	262.323	86.7818	262.98	75.5854	262.955	75.9089	262.935	76.111
23.3641	262.369	99.9917	262.375	99.9988	262.38	99.9998	262.434	83.5091	262.378	85.1505	262.323	86.8043	262.979	75.6087	262.956	75.8864	262.936	76.112
23.3832	262.369	99.9918	262.375	99.9988	262.38	99.9998	262.433	83.5426	262.377	85.1741	262.323	86.8052	262.979	75.6081	262.958	75.8726	262.937	76.116
23.4023	262.369	99.9918	262.375	99.9988	262.38	99.9998	262.432	83.5531	262.376	85.2112	262.323	86.7942	262.979	75.6095	262.96	75.885	262.937	76.121
23.4214	262.369	99.9918	262.375	99.9988	262.38	99.9998	262.432	83.5745	262.376	85.2059	262.324	86.7778	262.978	75.6067	262.958	75.9271	262.937	76.12
23.4404	262.369	99.9919	262.375	99.9988	262.38	99.9998	262.432	83.5646	262.377	85.1946	262.324	86.7688	262.978	75.6132	262.956	75.9422	262.936	76.12
23.4595	262.369	99.9919	262.375	99.9988	262.38	99.9998	262.432	83.5681	262.377	85.1958	262.324	86.7768	262.979	75.6021	262.955	75.9294	262.936	76.119
23.4786	262.369	99.992	262.375	99.9988	262.38	99.9998	262.432	83.5644	262.377	85.1919	262.323	86.7964	262.978	75.6102	262.957	75.8847	262.937	76.12
23.4977	262.369	99.992	262.375	99.9988	262.38	99.9998	262.432	83.5587	262.375	85.2415	262.323	86.8042	262.978	75.6053	262.959	75.8544	262.938	76.116
23.5167	262.369	99.992	262.375	99.9988	262.38	99.9998	262.432	83.5657	262.374	85.2832	262.322	86.8334	262.978	75.6075	262.961	75.8477	262.938	76.113
23.5358	262.369	99.9921	262.375	99.9988	262.38	99.9998	262.432	83.5761	262.373	85.2958	262.321	86.8446	262.979	75.5948	262.961	75.8752	262.938	76.113
23.5549	262.369	99.9921	262.375	99.9988	262.38	99.9998	262.431	83.5784	262.373	85.3041	262.321	86.8563	262.98	75.5854	262.958	75.9248	262.938	76.116
23.574	262.369	99.9921	262.375	99.9988	262.38	99.9998	262.431	83.5913	262.374	85.2804	262.321	86.8457	262.979	75.6117	262.955	75.9448	262.937	76.118
23.593	262.369	99.9922	262.375	99.9989	262.38	99.9998	262.431	83.5925	262.375	85.2513	262.322	86.8241	262.978	75.6211	262.956	75.9277	262.937	76.123
23.6121	262.369	99.9922	262.375	99.9989	262.38	99.9998	262.431	83.5885	262.375	85.2342	262.322	86.8234	262.977	75.6193	262.958	75.879	262.937	76.127
23.6312	262.369	99.9922	262.375	99.9989	262.38	99.9998	262.431	83.6016	262.375	85.2366	262.322	86.8137	262.977	75.6194	262.96	75.8495	262.938	76.124
23.6503	262.369	99.9923	262.375	99.9989	262.38	99.9998	262.431	83.5973	262.374	85.2665	262.321	86.8473	262.978	75.6064	262.959	75.8708	262.938	76.124
23.6693	262.369	99.9923	262.375	99.9989	262.38	99.9998	262.431	83.5815	262.374	85.2807	262.32	86.8846	262.98	75.5939	262.958	75.8923	262.938	76.127
23.6884	262.369	99.9923	262.375	99.9989	262.38	99.9998	262.431	83.5959	262.373	85.3042	262.319	86.9145	262.979	75.6202	262.958	75.8961	262.937	76.131
23.7075	262.369	99.9924	262.375	99.9989	262.38	99.9998	262.431	83.6006	262.372	85.3334	262.319	86.9126	262.978	75.6331	262.957	75.9082	262.937	76.141
23.7265	262.369	99.9924	262.375	99.9989	262.38	99.9998	262.43	83.6129	262.372	85.3275	262.319	86.9047	262.977	75.6398	262.958	75.9016	262.937	76.147
23.7456	262.369	99.9924	262.375	99.9989	262.38	99.9998	262.43	83.6201	262.372	85.3315	262.32	86.8906	262.976	75.6569	262.957	75.9019	262.937	76.144
23.7647	262.369	99.9925	262.375	99.9989	262.38	99.9998	262.43	83.6325	262.372	85.3266	262.32	86.8827	262.977	75.627	262.957	75.9111	262.937	76.136
23.7838	262.369	99.9925	262.375	99.9989	262.38	99.9998	262.43	83.6374	262.372	85.3337	262.32	86.8984	262.978	75.6041	262.957	75.9206	262.937	76.127
23.8028	262.369	99.9925	262.375	99.9989	262.38	99.9998	262.43	83.6365	262.372	85.328	262.32	86.895	262.979	75.5922	262.957	75.9249	262.937	76.115
23.8219	262.369	99.9926	262.375	99.9989	262.38	99.9998	262.43	83.6286	262.372	85.3245	262.32	86.8775	262.979	75.5962	262.958	75.9119	262.937	76.109
23.841	262.369	99.9926	262.375	99.9989	262.38	99.9998	262.43	83.6255	262.373	85.3197	262.321	86.8716	262.979	75.5959	262.959	75.9081	262.937	76.103
23.8601	262.369	99.9926	262.375	99.9989	262.38	99.9998	262.43	83.617	262.373	85.3206	262.321	86.8644	262.979	75.5956	262.958	75.9164	262.937	76.099
23.8791	262.369	99.9927	262.375	99.9989	262.38	99.9998	262.43	83.6083	262.372	85.3382	262.321	86.8631	262.979	75.5753	262.956	75.943	262.937	76.096
23.8982	262.369	99.9927	262.375	99.999	262.38	99.9998	262.43	83.6138	262.371	85.3669	262.321	86.858	262.98	75.5716	262.957	75.9367	262.937	76.096
23.9173	262.369	99.9927	262.375	99.999	262.38	99.9998	262.43	83.621	262.37	85.3911	262.321	86.8576	262.98	75.5841	262.958	75.9171	262.936	76.098
23.9364	262.369	99.9927	262.375	99.999	262.38	99.9998	262.429	83.6405	262.37	85.3949	262.321	86.8551	262.98	75.5921	262.957	75.9102	262.937	76.107
23.9554	262.369	99.9928	262.375	99.999	262.38	99.9998	262.429	83.6524	262.37	85.3937	262.321	86.8519	262.978	75.606	262.957	75.9009	262.937	76.112
23.9745	262.369	99.9928	262.375	99.999	262.38	99.9998	262.429	83.646	262.37	85.3986	262.321	86.8578	262.978	75.6192	262.957	75.8935	262.938	76.112
23.9936	262.369	99.9928	262.375	99.999	262.38	99.9998	262.429	83.6451	262.37	85.3964	262.32	86.8746	262.978	75.5984	262.96	75.873	262.938	76.108
24.0127	262.369	99.9929	262.375	99.999	262.38	99.9998	262.429	83.6507	262.369	85.4206	262.32	86.885	262.979	75.5869	262.961	75.8769	262.938	76.1
24.0317	262.369	99.9929	262.375	99.999	262.38	99.9998	262.43	83.6366	262.369	85.4233	262.32	86.8925	262.98	75.5685	262.959	75.8983	262.938	76.095
24.0508	262.369	99.9929	262.375	99.999	262.38	99.9998	262.43	83.6307	262.369	85.4208	262.319	86.9059	262.98	75.5695	262.957	75.9234	262.938	76.093
24.0699	262.369	99.9929	262.375	99.999	262.38	99.9999	262.429	83.6474	262.37	85.4132	262.319	86.9153	262.978	75.5906	262.956	75.9359	262.937	76.089
24.089	262.369	99.993	262.375	99.999	262.38	99.9999	262.429	83.6554	262.37	85.4061	262.318	86.9441	262.978	75.5897	262.959	75.9078	262.937	76.087
24.108	262.369	99.993	262.375	99.999	262.38	99.9999	262.429	83.6684	262.37	85.4131	262.318	86.9622	262.98	75.5696	262.959	75.8685	262.938	76.088
24.1271	262.369	99.993	262.375	99.999	262.38	99.9999	262.428	83.6785	262.369	85.4385	262.318	86.9627	262.981	75.5563	262.959	75.8571	262.938	76.089
24.1462	262.369	99.9931	262.375	99.999	262.38	99.9999	262.428	83.6813	262.368	85.4595	262.317	86.9822	262.981	75.5724	262.959	75.8313	262.939	76.095
24.1652	262.369	99.9931	262.375	99.999	262.38	99.9999	262.428	83.7	262.368	85.465	262.317	86.981	262.98	75.5977	262.959	75.81	262.939	76.105
24.1843	262.369	99.9931	262.375	99.999	262.38	99.9999	262.428	83.69	262.368	85.4597	262.317	86.9782	262.978	75.6184	262.96	75.8283	262.94	76.114
24.2034	262.369	99.9932	262.375	99.999	262.38	99.9999	262.428	83.684	262.368	85.4501	262.318	86.9548	262.977	75.6203	262.962	75.8216	262.94	76.116
24.2225	262.369	99.9932	262.375	99.9991	262.38	99.9999	262.428	83.6872	262.368	85.4638	262.318	86.9608	262.978	75.5997	262.962	75.8459	262.939	76.111
24.2415	262.369	99.9932	262.375	99.9991	262.38	99.9999	262.428	83.686	262.368	85.4587	262.317	86.9857	262.978	75.5861	262.958	75.8991	262.939	76.096
24.2606	262.369	99.9933	262.375	99.9991	262.38	99.9999	262.428	83.6905	262.368	85.4655	262.316	87.0044	262.979	75.5689	262.957	75.9033	262.938	76.083
24.2797	262.369	99.9933	262.375	99.9991	262.38	99.9999	262.427	83.7052	262.368	85.4657	262.316	87.0223	262.98	75.546	262.958	75.8864	262.938	76.076
24.2987	262.369	99.9933	262.375	99.9991	262.38	99.9999	262.427	83.7167	262.369	85.4458	262.316	87.0229	262.98	75.5572	262.959	75.8504	262.938	76.074
24.3178	262.369	99.9933	262.375	99.9991	262.38	99.9999	262.427	83.7237	262.368	85.4642	262.316	87.0163	262.98	75.5643	262.959	75.8418	262.939	76.073
24.3369	262.369	99.9934	262.375	99.9991	262.38	99.9999	262.426	83.741	262.368	85.4583	262.316	87.0029	262.979	75.5719	262.96	75.823	262.939	76.077
24.356	262.369	99.9934	262.375	99.9991	262.38	99.9999	262.426	83.7602	262.368	85.4651	262.316	87.0106	262.98	75.5664	262.96	75.8242	262.94	76.076
24.3751	262.369	99.9934	262.375	99.9991	262.38	99.9999	262.425	83.7715	262.367	85.4875	262.317	86.995	262.979	75.5638	262.96	75.8284	262.94	76.075
24.3941	262.369	99.9934	262.375	99.9991	262.38	99.9999	262.425	83.7721	262.367	85.4928	262.315	87.0339	262.979	75.5566	262.961	75.8416	262.94	76.069
24.4132	262.369	99.9935	262.375	99.9991	262.38	99.9999	262.425	83.7659	262.366	85.5116	262.315	87.0473	262.979	75.559	262.962	75.8376	262.94	76.062
24.4323	262.369	99.9935	262.375	99.9991	262.38	99.9999	262.425	83.7663	262.366	85.5141	262.315	87.0499	262.98	75.5396	262.961	75.8524	262.94	76.059
24.4513	262.369	99.9935	262.375	99.9991	262.38	99.9999	262.425	83.7655	262.366	85.5127	262.315	87.0506	262.981	75.5323	262.96	75.8855	262.939	76.058
24.4704	262.369	99.9935	262.375	99.9991	262.38	99.9999	262.425	83.7753	262.366	85.5158	262.315	87.0473	262.981	75.5456	262.958	75.9024	262.938	76.057
24.4895	262.369	99.9936	262.375	99.9991	262.38	99.9999	262.425	83.7856	262.366	85.5209	262.316	87.0301	262.981	75.5536	262.956	75.912	262.937	76.062
24.5086	262.369	99.9936	262.375	99.9991	262.38	99.9999	262.424	83.7949	262.366	85.5126	262.315	87.0495	262.981	75.5561	262.957	75.8688	262.937	76.072
24.5276	262.369	99.9936	262.375	99.9991	262.38	99.9999	262.424	83.8188	262.367	85.4936	262.315	87.0443	262.981	75.5629	262.958	75.8137	262.938	76.08
24.5467	262.369	99.9936	262.375	99.9991	262.38	99.9999	262.423	83.8255	262.367	85.4943	262.315	87.0511	262.98	75.58	262.961	75.7924	262.939	76.087
24.5658	262.369	99.9937	262.375	99.9991	262.38	99.9999	262.423	83.8303	262.367	85.4811	262.315	87.048	262.979	75.5866	262.963	75.782	262.94	76.088
24.5849	262.369	99.9937	262.375	99.9991	262.38	99.9999	262.424	83.8203	262.368	85.4762	262.315	87.0388	262.979	75.588	262.962	75.819	262.941	76.09
24.6039	262.369	99.9937	262.375	99.9992	262.38	99.9999	262.424	83.8164	262.368	85.4783	262.316	87.0288	262.979	75.5648	262.961	75.8597	262.94	76.086
24.623	262.369	99.9938	262.375	99.9992	262.38	99.9999	262.424	83.8221	262.367	85.5002	262.315	87.0485	262.979	75.5727	262.961	75.8676	262.939	76.08
24.6421	262.369	99.9938	262.375	99.9992	262.38	99.9999	262.423	83.8238	262.366	85.536	262.315	87.0579	262.979	75.5564	262.959	75.8867	262.938	76.073
24.6611	262.369	99.9938	262.375	99.9992	262.38	99.9999	262.424	83.8229	262.366	85.533	262.314	87.0806	262.979	75.5603	262.957	75.8936	262.938	76.07
24.6802	262.369	99.9938	262.375	99.9992	262.38	99.9999	262.423	83.8332	262.367	85.5089	262.314	87.0884	262.98	75.5531	262.957	75.856	262.938	76.069
24.6993	262.369	99.9939	262.375	99.9992	262.38	99.9999	262.423	83.8383	262.367	85.4987	262.313	87.1246	262.98	75.5501	262.959	75.8322	262.938	76.072
24.7184	262.369	99.9939	262.375	99.9992	262.38	99.9999	262.422	83.8556	262.367	85.505	262.313	87.1126	262.979	75.5663	262.96	75.8479	262.938	76.073
24.7374	262.369	99.9939	262.375	99.9992	262.38	99.9999	262.422	83.8703	262.367	85.4893	262.313	87.0986	262.979	75.5724	262.959	75.8573	262.938	76.075
24.7565	262.369	99.9939	262.375	99.9992	262.38	99.9999	262.422	83.8846	262.367	85.4947	262.314	87.0714	262.979	75.5647	262.957	75.8836	262.938	76.078
24.7756	262.369	99.994	262.375	99.9992	262.38	99.9999	262.422	83.8746	262.367	85.4989	262.314	87.0711	262.979	75.5629	262.957	75.8976	262.937	76.078
24.7947	262.369	99.994	262.375	99.9992	262.38	99.9999	262.422	83.8724	262.367	85.5097	262.315	87.0535	262.98	75.5619	262.958	75.8895	262.937	76.082
24.8137	262.369	99.994	262.375	99.9992	262.38	99.9999	262.422	83.877	262.366	85.5383	262.314	87.0655	262.98	75.57	262.958	75.8934	262.938	76.095
24.8328	262.369	99.994	262.375	99.9992	262.38	99.9999	262.422	83.8815	262.364	85.5815	262.314	87.0833	262.98	75.5904	262.959	75.8667	262.937	76.112
24.8519	262.369	99.9941	262.375	99.9992	262.38	99.9999	262.422	83.8794	262.363	85.6137	262.313	87.0958	262.978	75.6319	262.958	75.887	262.937	76.127
24.871	262.369	99.9941	262.375	99.9992	262.38	99.9999	262.422	83.8816	262.363	85.6129	262.314	87.0909	262.977	75.6441	262.957	75.9053	262.937	76.137
24.89	262.369	99.9941	262.375	99.9992	262.38	99.9999	262.421	83.8884	262.363	85.6057	262.314	87.0921	262.977	75.6407	262.958	75.8854	262.937	76.142
24.9091	262.369	99.9941	262.375	99.9992	262.38	99.9999	262.421	83.9123	262.364	85.5866	262.314	87.0887	262.977	75.618	262.958	75.8746	262.937	76.135
24.9282	262.369	99.9942	262.375	99.9992	262.38	99.9999	262.42	83.9296	262.364	85.5755	262.314	87.0915	262.977	75.6155	262.958	75.8449	262.938	76.123
24.9473	262.369	99.9942	262.375	99.9992	262.38	99.9999	262.42	83.9428	262.364	85.5771	262.313	87.1243	262.977	75.5947	262.96	75.8422	262.939	76.11
24.9663	262.369	99.9942	262.375	99.9992	262.38	99.9999	262.42	83.9396	262.363	85.6148	262.311	87.1642	262.979	75.5854	262.96	75.8371	262.939	76.104
24.9854	262.369	99.9942	262.375	99.9992	262.38	99.9999	262.42	83.9258	262.362	85.6494	262.309	87.2228	262.979	75.5778	262.96	75.8471	262.939	76.101
25.0045	262.369	99.9943	262.375	99.9993	262.38	99.9999	262.421	83.9153	262.362	85.6662	262.309	87.2229	262.979	75.5877	262.96	75.8702	262.939	76.1
25.0236	262.369	99.9943	262.375	99.9993	262.38	99.9999	262.421	83.9055	262.362	85.6518	262.31	87.2185	262.979	75.5984	262.959	75.8932	262.938	76.1
25.0426	262.369	99.9943	262.375	99.9993	262.38	99.9999	262.421	83.8976	262.362	85.643	262.31	87.1987	262.979	75.5936	262.958	75.9001	262.938	76.103
25.0617	262.369	99.9943	262.375	99.9993	262.38	99.9999	262.421	83.9021	262.363	85.6273	262.31	87.1919	262.979	75.5848	262.958	75.8913	262.938	76.106
25.0808	262.369	99.9944	262.375	99.9993	262.38	99.9999	262.421	83.9059	262.362	85.6385	262.311	87.1782	262.979	75.5891	262.958	75.8699	262.938	76.107
25.0998	262.369	99.9944	262.375	99.9993	262.38	99.9999	262.421	83.9152	262.362	85.6539	262.311	87.1749	262.978	75.6058	262.958	75.8591	262.938	76.109
25.1189	262.369	99.9944	262.375	99.9993	262.38	99.9999	262.42	83.9211	262.361	85.6727	262.311	87.1752	262.978	75.6042	262.96	75.863	262.938	76.112
25.138	262.369	99.9944	262.375	99.9993	262.38	99.9999	262.42	83.9303	262.361	85.6788	262.31	87.1952	262.979	75.5993	262.959	75.8709	262.938	76.116
25.1571	262.369	99.9945	262.375	99.9993	262.38	99.9999	262.42	83.9331	262.362	85.6662	262.31	87.2034	262.979	75.6029	262.958	75.8976	262.938	76.118
25.1761	262.369	99.9945	262.375	99.9993	262.38	99.9999	262.42	83.9378	262.362	85.6556	262.31	87.2149	262.978	75.6063	262.957	75.8986	262.938	76.121
25.1952	262.369	99.9945	262.375	99.9993	262.38	99.9999	262.42	83.9344	262.362	85.6665	262.311	87.1876	262.977	75.6158	262.958	75.9006	262.938	76.123
25.2143	262.369	99.9945	262.375	99.9993	262.38	99.9999	262.42	83.9323	262.361	85.668	262.311	87.1681	262.978	75.6225	262.959	75.8682	262.938	76.126
25.2334	262.369	99.9946	262.375	99.9993	262.38	99.9999	262.42	83.9195	262.361	85.6798	262.312	87.1514	262.978	75.6079	262.958	75.8845	262.938	76.131
25.2524	262.369	99.9946	262.375	99.9993	262.38	99.9999	262.42	83.916	262.361	85.6851	262.311	87.157	262.978	75.6164	262.959	75.9055	262.938	76.134
25.2715	262.369	99.9946	262.375	99.9993	262.38	99.9999	262.421	83.9068	262.361	85.6692	262.311	87.1663	262.979	75.6317	262.959	75.8916	262.937	76.143
25.2906	262.369	99.9946	262.375	99.9993	262.38	99.9999	262.421	83.9027	262.361	85.6825	262.31	87.21	262.978	75.6336	262.958	75.9025	262.937	76.155
25.3097	262.369	99.9947	262.375	99.9993	262.38	99.9999	262.421	83.8973	262.36	85.7153	262.309	87.2315	262.977	75.6651	262.957	75.9052	262.937	76.165
25.3287	262.369	99.9947	262.375	99.9993	262.38	99.9999	262.421	83.8968	262.359	85.7342	262.309	87.2393	262.976	75.6674	262.958	75.8966	262.938	76.172
25.3478	262.369	99.9947	262.375	99.9993	262.38	99.9999	262.421	83.9065	262.359	85.7543	262.309	87.2303	262.976	75.6685	262.959	75.8724	262.938	76.174
25.3669	262.369	99.9947	262.375	99.9993	262.38	99.9999	262.42	83.9317	262.358	85.784	262.31	87.2125	262.975	75.6666	262.96	75.8633	262.939	76.168
25.3859	262.369	99.9947	262.375	99.9993	262.38	99.9999	262.42	83.9438	262.358	85.7908	262.311	87.1818	262.976	75.6436	262.959	75.8652	262.939	76.165
25.405	262.369	99.9948	262.375	99.9993	262.38	99.9999	262.419	83.9612	262.358	85.7786	262.311	87.1707	262.977	75.6346	262.96	75.8894	262.939	76.163
25.4241	262.369	99.9948	262.375	99.9993	262.38	99.9999	262.419	83.9668	262.358	85.7681	262.31	87.1937	262.977	75.6526	262.961	75.8914	262.939	76.163
25.4432	262.369	99.9948	262.375	99.9993	262.38	99.9999	262.419	83.9704	262.358	85.7662	262.31	87.2089	262.977	75.6565	262.961	75.9105	262.938	76.165
25.4622	262.369	99.9948	262.375	99.9993	262.38	99.9999	262.418	83.9835	262.358	85.7791	262.309	87.2452	262.976	75.666	262.957	75.9356	262.937	76.166
25.4813	262.369	99.9949	262.375	99.9994	262.38	99.9999	262.418	83.9886	262.358	85.7872	262.308	87.262	262.977	75.6541	262.956	75.9482	262.937	76.162
25.5004	262.369	99.9949	262.375	99.9994	262.38	99.9999	262.418	83.983	262.357	85.8001	262.308	87.2691	262.976	75.6427	262.955	75.9434	262.936	76.153
25.5195	262.369	99.9949	262.375	99.9994	262.38	99.9999	262.419	83.9703	262.357	85.7989	262.309	87.2431	262.976	75.6308	262.957	75.9229	262.936	76.139
25.5385	262.369	99.9949	262.375	99.9994	262.38	99.9999	262.418	83.9789	262.358	85.7706	262.309	87.2246	262.978	75.6107	262.957	75.9062	262.936	76.126
25.5576	262.369	99.9949	262.375	99.9994	262.38	99.9999	262.418	83.9777	262.358	85.7855	262.309	87.2275	262.978	75.5981	262.957	75.9026	262.937	76.117
25.5767	262.369	99.995	262.375	99.9994	262.38	99.9999	262.418	83.9798	262.357	85.7937	262.309	87.2336	262.979	75.5892	262.958	75.8944	262.937	76.111
25.5957	262.369	99.995	262.375	99.9994	262.38	99.9999	262.418	83.9808	262.358	85.7925	262.308	87.2528	262.979	75.5987	262.959	75.8908	262.938	76.108
25.6148	262.369	99.995	262.375	99.9994	262.38	99.9999	262.418	83.9784	262.357	85.807	262.309	87.2462	262.979	75.6	262.959	75.9066	262.938	76.108
25.6339	262.369	99.995	262.375	99.9994	262.38	99.9999	262.418	83.9814	262.357	85.8236	262.309	87.2343	262.979	75.5948	262.959	75.9414	262.937	76.112
25.653	262.369	99.9951	262.375	99.9994	262.38	99.9999	262.418	83.9861	262.357	85.8198	262.309	87.2294	262.979	75.5974	262.956	75.9613	262.936	76.113
25.672	262.369	99.9951	262.375	99.9994	262.38	99.9999	262.418	83.9854	262.356	85.8259	262.309	87.2252	262.979	75.6072	262.955	75.9478	262.936	76.117
25.6911	262.369	99.9951	262.375	99.9994	262.38	99.9999	262.418	83.9776	262.356	85.8349	262.309	87.2382	262.979	75.6051	262.956	75.9337	262.936	76.123
25.7102	262.369	99.9951	262.375	99.9994	262.38	99.9999	262.419	83.9692	262.356	85.8503	262.309	87.2368	262.978	75.6203	262.958	75.9059	262.937	76.132
25.7293	262.369	99.9951	262.375	99.9994	262.38	99.9999	262.419	83.9741	262.355	85.8654	262.308	87.2646	262.978	75.628	262.96	75.8918	262.937	76.137
25.7483	262.369	99.9952	262.375	99.9994	262.38	99.9999	262.418	83.9848	262.355	85.8709	262.308	87.2703	262.978	75.6379	262.96	75.9231	262.937	76.141
25.7674	262.369	99.9952	262.375	99.9994	262.38	99.9999	262.419	83.9774	262.355	85.8607	262.307	87.3137	262.978	75.6322	262.956	75.9565	262.936	76.144
25.7865	262.369	99.9952	262.375	99.9994	262.38	99.9999	262.419	83.9754	262.355	85.8587	262.306	87.3353	262.978	75.6271	262.954	75.9608	262.936	76.146
25.8056	262.369	99.9952	262.375	99.9994	262.38	99.9999	262.419	83.9696	262.356	85.846	262.306	87.3397	262.977	75.6337	262.955	75.9271	262.936	76.146
25.8246	262.369	99.9952	262.375	99.9994	262.38	99.9999	262.419	83.9735	262.356	85.8487	262.306	87.3291	262.975	75.6419	262.958	75.8804	262.937	76.142
25.8437	262.369	99.9953	262.375	99.9994	262.38	99.9999	262.418	83.9837	262.356	85.8309	262.307	87.3126	262.976	75.6377	262.961	75.8532	262.938	76.135
25.8628	262.369	99.9953	262.375	99.9994	262.38	99.9999	262.418	83.9789	262.356	85.8298	262.307	87.3114	262.978	75.6116	262.961	75.8687	262.939	76.124
25.8819	262.369	99.9953	262.375	99.9994	262.38	99.9999	262.418	83.9783	262.357	85.8142	262.306	87.339	262.979	75.5883	262.96	75.8946	262.939	76.115
25.9009	262.369	99.9953	262.375	99.9994	262.38	99.9999	262.419	83.9744	262.357	85.8152	262.305	87.3501	262.98	75.5814	262.958	75.9271	262.938	76.114
25.92	262.369	99.9953	262.375	99.9994	262.38	99.9999	262.418	83.9784	262.356	85.8387	262.305	87.3566	262.98	75.5953	262.957	75.9134	262.938	76.124
25.9391	262.369	99.9954	262.375	99.9994	262.38	99.9999	262.418	83.996	262.355	85.8634	262.305	87.356	262.979	75.6362	262.957	75.9005	262.938	76.143
25.9581	262.369	99.9954	262.375	99.9994	262.38	99.9999	262.418	83.9821	262.354	85.8873	262.305	87.3607	262.979	75.6576	262.959	75.8647	262.938	76.165
25.9772	262.369	99.9954	262.375	99.9994	262.38	99.9999	262.418	83.9951	262.354	85.9143	262.305	87.3511	262.978	75.6871	262.96	75.8556	262.938	76.184
25.9963	262.369	99.9954	262.375	99.9994	262.38	99.9999	262.418	83.9944	262.353	85.9315	262.305	87.369	262.977	75.6895	262.96	75.8949	262.938	76.195
26.0154	262.369	99.9954	262.375	99.9994	262.38	99.9999	262.417	84.0138	262.354	85.9039	262.304	87.3904	262.977	75.6906	262.958	75.9404	262.937	76.2
26.0344	262.369	99.9955	262.375	99.9995	262.38	99.9999	262.417	84.031	262.354	85.9007	262.304	87.408	262.975	75.6915	262.955	75.9568	262.936	76.195
26.0535	262.369	99.9955	262.375	99.9995	262.38	99.9999	262.416	84.0472	262.354	85.9019	262.303	87.4211	262.976	75.6816	262.955	75.9414	262.936	76.186
26.0726	262.369	99.9955	262.375	99.9995	262.38	99.9999	262.416	84.0545	262.354	85.914	262.303	87.4358	262.976	75.661	262.957	75.8835	262.937	76.174
26.0917	262.369	99.9955	262.375	99.9995	262.38	99.9999	262.416	84.0469	262.354	85.9153	262.302	87.4589	262.977	75.644	262.958	75.8806	262.938	76.162
26.1107	262.369	99.9955	262.375	99.9995	262.38	99.9999	262.416	84.0539	262.354	85.9055	262.301	87.4967	262.978	75.6341	262.961	75.8602	262.938	76.154
26.1298	262.369	99.9956	262.375	99.9995	262.38	99.9999	262.416	84.0604	262.354	85.8985	262.3	87.5243	262.978	75.6311	262.961	75.8896	262.938	76.152
26.1489	262.369	99.9956	262.375	99.9995	262.38	99.9999	262.416	84.0656	262.354	85.8961	262.3	87.533	262.978	75.6402	262.957	75.9446	262.937	76.159
26.168	262.369	99.9956	262.375	99.9995	262.38	99.9999	262.415	84.0773	262.354	85.8978	262.3	87.5084	262.979	75.6503	262.954	75.9642	262.936	76.173
26.187	262.369	99.9956	262.375	99.9995	262.38	99.9999	262.415	84.0946	262.354	85.9103	262.3	87.5043	262.977	75.6818	262.954	75.9619	262.936	76.188
26.2061	262.369	99.9956	262.375	99.9995	262.38	99.9999	262.414	84.1021	262.353	85.9285	262.301	87.4904	262.976	75.6999	262.957	75.9196	262.936	76.201
26.2252	262.369	99.9956	262.375	99.9995	262.38	99.9999	262.414	84.1118	262.353	85.9362	262.301	87.5031	262.974	75.7097	262.959	75.9039	262.936	76.207
26.2443	262.369	99.9957	262.375	99.9995	262.38	99.9999	262.414	84.1103	262.353	85.9317	262.3	87.5117	262.975	75.7014	262.958	75.9129	262.936	76.208
26.2633	262.369	99.9957	262.375	99.9995	262.38	99.9999	262.414	84.1213	262.353	85.918	262.299	87.54	262.976	75.6844	262.955	75.9456	262.936	76.203
26.2824	262.369	99.9957	262.375	99.9995	262.38	99.9999	262.414	84.1213	262.353	85.9415	262.299	87.5605	262.976	75.6838	262.955	75.9278	262.936	76.197
26.3015	262.369	99.9957	262.375	99.9995	262.38	99.9999	262.414	84.1153	262.352	85.955	262.299	87.5563	262.976	75.6758	262.956	75.9116	262.936	76.192
26.3205	262.369	99.9957	262.375	99.9995	262.38	99.9999	262.414	84.1176	262.352	85.954	262.299	87.5629	262.977	75.6799	262.958	75.8788	262.937	76.192
26.3396	262.369	99.9958	262.375	99.9995	262.38	99.9999	262.414	84.1321	262.354	85.9169	262.299	87.5491	262.977	75.6767	262.961	75.8733	262.937	76.193
26.3587	262.369	99.9958	262.375	99.9995	262.38	99.9999	262.413	84.1457	262.354	85.9152	262.3	87.5357	262.978	75.6824	262.958	75.9139	262.937	76.198
26.3778	262.369	99.9958	262.375	99.9995	262.38	99.9999	262.413	84.1471	262.354	85.9017	262.3	87.5181	262.978	75.6901	262.956	75.9333	262.937	76.204
26.3968	262.369	99.9958	262.375	99.9995	262.38	99.9999	262.413	84.1403	262.354	85.9129	262.3	87.5313	262.977	75.7008	262.955	75.916	262.936	76.21
26.4159	262.369	99.9958	262.375	99.9995	262.38	99.9999	262.413	84.1432	262.353	85.945	262.3	87.5318	262.976	75.7097	262.956	75.8556	262.937	76.213
26.435	262.369	99.9959	262.375	99.9995	262.38	99.9999	262.414	84.1305	262.352	85.9684	262.299	87.5518	262.975	75.7057	262.959	75.8195	262.938	76.208
26.4541	262.369	99.9959	262.375	99.9995	262.38	99.9999	262.414	84.1298	262.352	85.9639	262.297	87.6011	262.974	75.6996	262.962	75.8084	262.939	76.196
26.4731	262.369	99.9959	262.375	99.9995	262.38	99.9999	262.413	84.1447	262.353	85.938	262.297	87.6194	262.976	75.6649	262.963	75.8189	262.939	76.183
26.4922	262.369	99.9959	262.375	99.9995	262.38	99.9999	262.413	84.1566	262.353	85.9209	262.297	87.6188	262.977	75.6429	262.96	75.8629	262.939	76.17
26.5113	262.369	99.9959	262.375	99.9995	262.38	99.9999	262.412	84.1689	262.354	85.9176	262.297	87.6125	262.978	75.6411	262.956	75.9202	262.938	76.162
26.5303	262.369	99.9959	262.375	99.9995	262.38	99.9999	262.412	84.1646	262.353	85.9327	262.297	87.6113	262.978	75.6418	262.955	75.9103	262.937	76.159
26.5494	262.369	99.996	262.375	99.9995	262.38	99.9999	262.412	84.1706	262.352	85.958	262.298	87.5983	262.978	75.6589	262.957	75.8607	262.937	76.159
26.5685	262.369	99.996	262.375	99.9995	262.38	99.9999	262.412	84.1774	262.351	85.9917	262.297	87.6111	262.978	75.6492	262.96	75.8271	262.938	76.158
26.5876	262.369	99.996	262.375	99.9995	262.38	99.9999	262.412	84.1795	262.35	86.0144	262.297	87.6146	262.979	75.6438	262.961	75.8178	262.939	76.156
26.6066	262.369	99.996	262.375	99.9995	262.38	99.9999	262.412	84.17	262.351	86.0016	262.297	87.6231	262.978	75.6354	262.959	75.8284	262.939	76.148
26.6257	262.369	99.996	262.375	99.9995	262.38	99.9999	262.412	84.168	262.351	85.9929	262.296	87.6312	262.977	75.634	262.959	75.8441	262.939	76.136
26.6448	262.369	99.996	262.375	99.9995	262.38	99.9999	262.413	84.1528	262.351	85.9938	262.297	87.6281	262.978	75.618	262.96	75.8452	262.939	76.125
26.6639	262.369	99.9961	262.375	99.9995	262.38	99.9999	262.412	84.1691	262.352	85.977	262.297	87.6226	262.979	75.5906	262.961	75.8537	262.938	76.117
26.6829	262.369	99.9961	262.375	99.9995	262.38	99.9999	262.412	84.1922	262.351	85.9994	262.297	87.6198	262.98	75.5867	262.959	75.8995	262.938	76.114
26.702	262.369	99.9961	262.375	99.9996	262.38	99.9999	262.411	84.2087	262.35	86.0138	262.297	87.6228	262.98	75.5976	262.956	75.9307	262.937	76.12
26.7211	262.369	99.9961	262.375	99.9996	262.38	99.9999	262.411	84.2172	262.35	86.0254	262.297	87.626	262.98	75.6191	262.955	75.9432	262.936	76.13
26.7402	262.369	99.9961	262.375	99.9996	262.38	99.9999	262.411	84.224	262.35	86.0393	262.296	87.6318	262.979	75.6441	262.956	75.9042	262.936	76.14
26.7592	262.369	99.9961	262.375	99.9996	262.38	99.9999	262.41	84.2484	262.35	86.0307	262.296	87.6527	262.979	75.6447	262.958	75.8899	262.937	76.146
26.7783	262.369	99.9962	262.375	99.9996	262.38	99.9999	262.41	84.2406	262.35	86.0247	262.296	87.6447	262.978	75.6347	262.96	75.8828	262.937	76.144
26.7974	262.369	99.9962	262.375	99.9996	262.38	99.9999	262.411	84.2241	262.35	86.0197	262.296	87.6348	262.977	75.6256	262.957	75.9133	262.937	76.135
26.8164	262.369	99.9962	262.375	99.9996	262.38	99.9999	262.411	84.2054	262.351	86.0097	262.296	87.6417	262.977	75.6129	262.955	75.9382	262.936	76.12
26.8355	262.369	99.9962	262.375	99.9996	262.38	99.9999	262.411	84.2141	262.35	86.0171	262.296	87.6343	262.977	75.595	262.956	75.9196	262.936	76.105
26.8546	262.369	99.9962	262.375	99.9996	262.38	99.9999	262.41	84.2343	262.35	86.0415	262.296	87.644	262.979	75.5708	262.957	75.8867	262.936	76.092
26.8737	262.369	99.9962	262.375	99.9996	262.38	99.9999	262.41	84.2411	262.349	86.0673	262.295	87.6655	262.98	75.5603	262.958	75.8728	262.937	76.087
26.8927	262.369	99.9963	262.375	99.9996	262.38	99.9999	262.409	84.2595	262.348	86.08	262.294	87.6956	262.981	75.5633	262.958	75.8807	262.937	76.09
26.9118	262.369	99.9963	262.375	99.9996	262.38	99.9999	262.409	84.2716	262.348	86.0801	262.294	87.6958	262.981	75.5877	262.958	75.8823	262.938	76.1
26.9309	262.369	99.9963	262.375	99.9996	262.38	99.9999	262.409	84.2778	262.349	86.0658	262.294	87.696	262.98	75.6101	262.959	75.8844	262.938	76.113
26.95	262.369	99.9963	262.375	99.9996	262.38	99.9999	262.409	84.2859	262.35	86.0405	262.294	87.6986	262.98	75.6178	262.958	75.8847	262.938	76.124
26.969	262.369	99.9963	262.375	99.9996	262.38	99.9999	262.409	84.2869	262.35	86.036	262.295	87.6897	262.979	75.6266	262.959	75.8703	262.939	76.13
26.9881	262.369	99.9963	262.375	99.9996	262.38	99.9999	262.409	84.2861	262.349	86.067	262.295	87.6921	262.979	75.6201	262.96	75.8624	262.939	76.131
27.0072	262.369	99.9963	262.375	99.9996	262.38	99.9999	262.409	84.2812	262.348	86.0787	262.295	87.6823	262.978	75.6137	262.96	75.878	262.939	76.131
27.0263	262.369	99.9964	262.375	99.9996	262.38	100	262.409	84.2713	262.347	86.1106	262.295	87.6939	262.978	75.6162	262.96	75.8717	262.939	76.128
27.0453	262.369	99.9964	262.375	99.9996	262.38	100	262.409	84.2706	262.347	86.1201	262.294	87.7032	262.978	75.6191	262.959	75.8741	262.939	76.125
27.0644	262.369	99.9964	262.375	99.9996	262.38	100	262.409	84.2732	262.347	86.12	262.295	87.682	262.978	75.6103	262.959	75.8878	262.939	76.124
27.0835	262.369	99.9964	262.375	99.9996	262.38	100	262.409	84.2853	262.347	86.1071	262.294	87.7071	262.978	75.6063	262.961	75.8646	262.939	76.12
27.1026	262.369	99.9964	262.375	99.9996	262.38	100	262.408	84.3037	262.348	86.0988	262.294	87.7099	262.978	75.6061	262.961	75.8774	262.939	76.115
27.1216	262.369	99.9964	262.375	99.9996	262.38	100	262.407	84.3238	262.348	86.0965	262.294	87.697	262.978	75.5981	262.959	75.9054	262.938	76.11
27.1407	262.369	99.9965	262.375	99.9996	262.38	100	262.406	84.3532	262.348	86.0919	262.295	87.6812	262.977	75.5959	262.957	75.9015	262.938	76.101
27.1598	262.369	99.9965	262.375	99.9996	262.38	100	262.406	84.3565	262.347	86.1196	262.294	87.6963	262.978	75.5853	262.956	75.8929	262.938	76.089
27.1789	262.369	99.9965	262.375	99.9996	262.38	100	262.406	84.3692	262.346	86.1412	262.295	87.6931	262.979	75.5612	262.958	75.8478	262.938	76.08
27.1979	262.369	99.9965	262.375	99.9996	262.38	100	262.406	84.3768	262.346	86.152	262.294	87.71	262.98	75.5471	262.96	75.8352	262.939	76.073
27.217	262.369	99.9965	262.375	99.9996	262.38	100	262.406	84.3632	262.346	86.1426	262.293	87.7401	262.981	75.5499	262.962	75.8436	262.939	76.069
27.2361	262.369	99.9965	262.375	99.9996	262.38	100	262.406	84.3707	262.347	86.1295	262.293	87.7525	262.981	75.5612	262.961	75.8795	262.939	76.075
27.2551	262.369	99.9966	262.375	99.9996	262.38	100	262.405	84.3885	262.347	86.124	262.293	87.7446	262.981	75.5671	262.957	75.9221	262.938	76.086
27.2742	262.369	99.9966	262.375	99.9996	262.38	100	262.405	84.3897	262.347	86.1091	262.293	87.7379	262.98	75.5902	262.956	75.9516	262.938	76.096
27.2933	262.369	99.9966	262.375	99.9996	262.38	100	262.406	84.3749	262.347	86.132	262.293	87.7346	262.979	75.6025	262.958	75.919	262.937	76.101
27.3124	262.369	99.9966	262.375	99.9996	262.38	100	262.406	84.3786	262.346	86.1571	262.293	87.7406	262.978	75.5977	262.959	75.8918	262.937	76.101
27.3314	262.369	99.9966	262.375	99.9996	262.38	100	262.405	84.3804	262.345	86.1958	262.293	87.7546	262.979	75.5863	262.959	75.898	262.938	76.098
27.3505	262.369	99.9966	262.375	99.9996	262.38	100	262.406	84.369	262.343	86.234	262.292	87.7831	262.98	75.5704	262.959	75.9059	262.938	76.092
27.3696	262.369	99.9966	262.375	99.9996	262.38	100	262.406	84.3641	262.343	86.2584	262.291	87.8117	262.98	75.5747	262.958	75.9252	262.938	76.09
27.3887	262.369	99.9967	262.375	99.9996	262.38	100	262.406	84.3752	262.343	86.2469	262.29	87.8274	262.98	75.5715	262.958	75.9331	262.938	76.091
27.4077	262.369	99.9967	262.375	99.9996	262.38	100	262.406	84.3786	262.344	86.2294	262.29	87.8299	262.978	75.588	262.958	75.9273	262.938	76.091
27.4268	262.369	99.9967	262.375	99.9996	262.38	100	262.405	84.386	262.345	86.1927	262.29	87.8468	262.978	75.5906	262.958	75.903	262.937	76.091
27.4459	262.369	99.9967	262.375	99.9996	262.38	100	262.406	84.379	262.345	86.1776	262.29	87.8379	262.98	75.5725	262.959	75.8701	262.938	76.093
27.465	262.369	99.9967	262.375	99.9996	262.38	100	262.405	84.3885	262.345	86.1782	262.29	87.8378	262.981	75.5724	262.958	75.8744	262.938	76.098
27.484	262.369	99.9967	262.375	99.9996	262.38	100	262.405	84.3931	262.345	86.1833	262.29	87.8333	262.981	75.5841	262.959	75.8582	262.939	76.106
27.5031	262.369	99.9967	262.375	99.9996	262.38	100	262.405	84.3949	262.345	86.185	262.291	87.8061	262.979	75.6092	262.96	75.8413	262.939	76.115
27.5222	262.369	99.9968	262.375	99.9996	262.38	100	262.405	84.4016	262.345	86.1847	262.291	87.7912	262.976	75.6324	262.961	75.8289	262.94	76.122
27.5413	262.369	99.9968	262.375	99.9996	262.38	100	262.404	84.4197	262.345	86.1756	262.292	87.7832	262.976	75.6187	262.962	75.8355	262.94	76.121
27.5603	262.369	99.9968	262.375	99.9997	262.38	100	262.405	84.4112	262.345	86.1757	262.291	87.8015	262.977	75.6046	262.96	75.8699	262.94	76.115
27.5794	262.369	99.9968	262.375	99.9997	262.38	100	262.404	84.4117	262.344	86.207	262.291	87.8165	262.979	75.5809	262.959	75.8809	262.94	76.112
27.5985	262.369	99.9968	262.375	99.9997	262.38	100	262.404	84.4204	262.343	86.2484	262.289	87.8646	262.98	75.5801	262.96	75.8656	262.94	76.113
27.6175	262.369	99.9968	262.375	99.9997	262.38	100	262.404	84.4397	262.342	86.2676	262.288	87.9064	262.978	75.6158	262.961	75.8589	262.94	76.118
27.6366	262.369	99.9968	262.375	99.9997	262.38	100	262.404	84.4381	262.342	86.265	262.287	87.9178	262.977	75.6231	262.96	75.8425	262.94	76.124
27.6557	262.369	99.9968	262.375	99.9997	262.38	100	262.404	84.436	262.343	86.2561	262.288	87.9124	262.977	75.6315	262.96	75.8526	262.939	76.127
27.6748	262.369	99.9969	262.375	99.9997	262.38	100	262.404	84.4289	262.343	86.25	262.288	87.8864	262.979	75.6089	262.96	75.8436	262.939	76.126
27.6938	262.369	99.9969	262.375	99.9997	262.38	100	262.404	84.4232	262.343	86.254	262.289	87.8545	262.98	75.5982	262.959	75.8471	262.939	76.124
27.7129	262.369	99.9969	262.375	99.9997	262.38	100	262.404	84.4187	262.342	86.285	262.29	87.8462	262.98	75.6078	262.96	75.8373	262.94	76.123
27.732	262.369	99.9969	262.375	99.9997	262.38	100	262.404	84.4263	262.342	86.292	262.289	87.8616	262.979	75.6157	262.961	75.8082	262.94	76.127
27.751	262.369	99.9969	262.375	99.9997	262.38	100	262.404	84.4384	262.341	86.3031	262.289	87.8531	262.978	75.6266	262.962	75.8122	262.94	76.129
27.7701	262.369	99.9969	262.375	99.9997	262.38	100	262.403	84.4532	262.341	86.2965	262.289	87.8705	262.977	75.6249	262.962	75.8209	262.94	76.125
27.7892	262.369	99.9969	262.375	99.9997	262.38	100	262.402	84.4829	262.342	86.2874	262.289	87.8753	262.977	75.6129	262.959	75.8414	262.939	76.115
27.8083	262.369	99.997	262.375	99.9997	262.38	100	262.402	84.5023	262.341	86.3008	262.288	87.9012	262.979	75.5831	262.958	75.8534	262.939	76.107
27.8273	262.369	99.997	262.375	99.9997	262.38	100	262.402	84.4946	262.341	86.309	262.287	87.9292	262.98	75.5704	262.959	75.832	262.94	76.1
27.8464	262.369	99.997	262.375	99.9997	262.38	100	262.402	84.4963	262.341	86.3177	262.287	87.9381	262.98	75.5819	262.962	75.8173	262.94	76.101
27.8655	262.369	99.997	262.375	99.9997	262.38	100	262.402	84.4827	262.34	86.3352	262.287	87.9391	262.98	75.5936	262.964	75.8198	262.94	76.109
27.8846	262.369	99.997	262.375	99.9997	262.38	100	262.403	84.4716	262.341	86.3174	262.287	87.9374	262.979	75.6154	262.962	75.8691	262.939	76.122
27.9036	262.369	99.997	262.375	99.9997	262.38	100	262.403	84.4718	262.341	86.3164	262.287	87.9225	262.979	75.6225	262.957	75.9241	262.938	76.136
27.9227	262.369	99.997	262.375	99.9997	262.38	100	262.403	84.4687	262.341	86.3092	262.287	87.9206	262.979	75.6381	262.955	75.915	262.937	76.151
27.9418	262.369	99.9971	262.375	99.9997	262.38	100	262.403	84.4707	262.341	86.3183	262.287	87.9275	262.977	75.6507	262.957	75.8731	262.937	76.159
27.9609	262.369	99.9971	262.375	99.9997	262.38	100	262.402	84.4931	262.34	86.3314	262.287	87.9275	262.975	75.6686	262.958	75.8246	262.938	76.161
27.9799	262.369	99.9971	262.375	99.9997	262.38	100	262.401	84.5075	262.34	86.3409	262.287	87.9424	262.975	75.6557	262.961	75.7908	262.939	76.159
27.999	262.369	99.9971	262.375	99.9997	262.38	100	262.401	84.5202	262.34	86.3383	262.286	87.954	262.977	75.6321	262.961	75.7981	262.94	76.153
28.0181	262.369	99.9971	262.375	99.9997	262.38	100	262.4	84.5378	262.341	86.3237	262.286	87.9514	262.977	75.6275	262.961	75.8262	262.94	76.144
28.0372	262.369	99.9971	262.375	99.9997	262.38	100	262.4	84.5394	262.341	86.3134	262.287	87.9428	262.978	75.6209	262.961	75.8318	262.94	76.137
28.0562	262.369	99.9971	262.375	99.9997	262.38	100	262.401	84.5318	262.341	86.3208	262.286	87.9503	262.977	75.6228	262.96	75.8459	262.94	76.133
28.0753	262.369	99.9971	262.375	99.9997	262.38	100	262.401	84.5273	262.34	86.3291	262.286	87.9629	262.976	75.6232	262.959	75.8276	262.939	76.126
28.0944	262.369	99.9972	262.375	99.9997	262.38	100	262.401	84.5274	262.339	86.3689	262.286	87.9568	262.978	75.6113	262.96	75.8082	262.939	76.117
28.1135	262.369	99.9972	262.375	99.9997	262.38	100	262.401	84.5258	262.339	86.3868	262.286	87.9631	262.979	75.5903	262.96	75.7985	262.94	76.11
28.1325	262.369	99.9972	262.375	99.9997	262.38	100	262.401	84.5197	262.338	86.3986	262.286	87.95	262.981	75.5795	262.961	75.8021	262.94	76.11
28.1516	262.369	99.9972	262.375	99.9997	262.38	100	262.401	84.5143	262.338	86.3896	262.287	87.9255	262.98	75.5875	262.962	75.8144	262.939	76.111
28.1707	262.369	99.9972	262.375	99.9997	262.38	100	262.402	84.4971	262.339	86.3733	262.287	87.9357	262.979	75.6223	262.959	75.854	262.939	76.113
28.1897	262.369	99.9972	262.375	99.9997	262.38	100	262.402	84.4866	262.34	86.3565	262.286	87.9554	262.977	75.617	262.957	75.8814	262.939	76.113
28.2088	262.369	99.9972	262.375	99.9997	262.38	100	262.402	84.4906	262.34	86.3566	262.285	88.0034	262.978	75.5993	262.958	75.8506	262.938	76.108
28.2279	262.369	99.9972	262.375	99.9997	262.38	100	262.402	84.5019	262.339	86.3611	262.284	88.0385	262.978	75.5791	262.959	75.8524	262.938	76.094
28.247	262.369	99.9973	262.375	99.9997	262.38	100	262.401	84.5117	262.34	86.3564	262.283	88.0452	262.979	75.5629	262.961	75.8408	262.938	76.081
28.266	262.369	99.9973	262.375	99.9997	262.38	100	262.401	84.5198	262.339	86.3794	262.284	88.0165	262.979	75.5504	262.959	75.8576	262.938	76.072
28.2851	262.369	99.9973	262.375	99.9997	262.38	100	262.401	84.5118	262.339	86.3807	262.284	88.0248	262.98	75.5534	262.957	75.871	262.938	76.073
28.3042	262.369	99.9973	262.375	99.9997	262.38	100	262.401	84.5318	262.339	86.3714	262.283	88.0425	262.981	75.5545	262.957	75.8647	262.938	76.079
28.3233	262.369	99.9973	262.375	99.9997	262.38	100	262.401	84.5344	262.34	86.3509	262.283	88.061	262.981	75.582	262.958	75.8358	262.938	76.092
28.3423	262.369	99.9973	262.375	99.9997	262.38	100	262.401	84.534	262.34	86.3574	262.283	88.07	262.981	75.5956	262.959	75.8329	262.939	76.107
28.3614	262.369	99.9973	262.375	99.9997	262.38	100	262.4	84.5469	262.339	86.3738	262.283	88.0615	262.98	75.6146	262.961	75.836	262.939	76.126
28.3805	262.369	99.9973	262.375	99.9997	262.38	100	262.4	84.5619	262.338	86.3902	262.283	88.0545	262.979	75.627	262.96	75.8824	262.938	76.136
28.3996	262.369	99.9974	262.375	99.9997	262.38	100	262.4	84.563	262.338	86.4176	262.283	88.0478	262.977	75.6503	262.957	75.9087	262.937	76.141
28.4186	262.369	99.9974	262.375	99.9997	262.38	100	262.4	84.5431	262.337	86.4224	262.282	88.0794	262.976	75.6352	262.955	75.9344	262.936	76.137
28.4377	262.369	99.9974	262.375	99.9997	262.38	100	262.4	84.5368	262.338	86.3973	262.282	88.0951	262.977	75.6168	262.955	75.8905	262.936	76.131
28.4568	262.369	99.9974	262.375	99.9997	262.38	100	262.4	84.5373	262.339	86.3862	262.282	88.1042	262.977	75.5983	262.957	75.8404	262.937	76.121
28.4759	262.369	99.9974	262.375	99.9997	262.38	100	262.4	84.5368	262.34	86.3507	262.281	88.1114	262.978	75.5954	262.96	75.8025	262.938	76.12
28.4949	262.369	99.9974	262.375	99.9997	262.38	100	262.4	84.5479	262.34	86.3445	262.282	88.0787	262.979	75.5988	262.961	75.7854	262.939	76.122
28.514	262.369	99.9974	262.375	99.9997	262.38	100	262.4	84.5545	262.34	86.3538	262.282	88.0769	262.978	75.6287	262.961	75.8082	262.94	76.128
28.5331	262.369	99.9974	262.375	99.9997	262.38	100	262.4	84.5645	262.339	86.3779	262.282	88.0807	262.977	75.6298	262.96	75.827	262.94	76.133
28.5521	262.369	99.9974	262.375	99.9997	262.38	100	262.4	84.5617	262.338	86.3967	262.281	88.1139	262.977	75.629	262.96	75.8298	262.939	76.136
28.5712	262.369	99.9975	262.375	99.9997	262.38	100	262.399	84.5723	262.338	86.402	262.281	88.122	262.977	75.6194	262.959	75.8117	262.94	76.129
28.5903	262.369	99.9975	262.375	99.9997	262.38	100	262.399	84.5747	262.339	86.3885	262.281	88.1263	262.978	75.6114	262.96	75.7919	262.94	76.12
28.6094	262.369	99.9975	262.375	99.9997	262.38	100	262.399	84.5817	262.339	86.3804	262.281	88.1267	262.977	75.5941	262.961	75.7941	262.94	76.11
28.6284	262.369	99.9975	262.375	99.9997	262.38	100	262.399	84.5699	262.339	86.3881	262.281	88.1317	262.979	75.5862	262.963	75.7911	262.94	76.101
28.6475	262.369	99.9975	262.375	99.9997	262.38	100	262.4	84.5622	262.338	86.4008	262.28	88.1393	262.98	75.5807	262.962	75.8054	262.94	76.097
28.6666	262.369	99.9975	262.375	99.9998	262.38	100	262.399	84.5679	262.337	86.4285	262.28	88.168	262.981	75.5715	262.96	75.8334	262.94	76.103
28.6857	262.369	99.9975	262.375	99.9998	262.38	100	262.4	84.5526	262.337	86.4509	262.279	88.1813	262.981	75.5904	262.959	75.8254	262.939	76.115
28.7047	262.369	99.9975	262.375	99.9998	262.38	100	262.4	84.5644	262.336	86.4676	262.279	88.1825	262.979	75.6256	262.958	75.7989	262.939	76.127
28.7238	262.369	99.9975	262.375	99.9998	262.38	100	262.399	84.5827	262.336	86.4583	262.279	88.1802	262.976	75.6496	262.96	75.7778	262.94	76.138
28.7429	262.369	99.9975	262.375	99.9998	262.38	100	262.398	84.599	262.336	86.453	262.279	88.1704	262.977	75.64	262.963	75.7659	262.94	76.142
28.7619	262.369	99.9976	262.375	99.9998	262.38	100	262.398	84.609	262.336	86.458	262.28	88.1406	262.977	75.6225	262.963	75.7795	262.94	76.138
28.781	262.369	99.9976	262.375	99.9998	262.38	100	262.398	84.6096	262.335	86.487	262.281	88.1284	262.977	75.613	262.96	75.8285	262.94	76.128
28.8001	262.369	99.9976	262.375	99.9998	262.38	100	262.397	84.6293	262.335	86.5067	262.281	88.1186	262.977	75.6036	262.958	75.8514	262.939	76.119
28.8192	262.369	99.9976	262.375	99.9998	262.38	100	262.397	84.6334	262.334	86.5388	262.28	88.1397	262.979	75.5989	262.958	75.8351	262.939	76.117
28.8382	262.369	99.9976	262.375	99.9998	262.38	100	262.397	84.6294	262.334	86.5359	262.279	88.1715	262.979	75.5992	262.96	75.7997	262.94	76.118
28.8573	262.369	99.9976	262.375	99.9998	262.38	100	262.397	84.6294	262.333	86.5494	262.279	88.1888	262.979	75.61	262.962	75.7845	262.94	76.123
28.8764	262.369	99.9976	262.375	99.9998	262.38	100	262.398	84.6281	262.333	86.5582	262.279	88.1963	262.979	75.6175	262.963	75.783	262.94	76.13
28.8955	262.369	99.9976	262.375	99.9998	262.38	100	262.397	84.6386	262.332	86.5813	262.28	88.1667	262.979	75.6315	262.96	75.8435	262.939	76.139
28.9145	262.369	99.9976	262.375	99.9998	262.38	100	262.397	84.6534	262.331	86.611	262.28	88.1469	262.978	75.6334	262.957	75.8516	262.939	76.147
28.9336	262.369	99.9977	262.375	99.9998	262.38	100	262.397	84.6402	262.331	86.6284	262.281	88.1279	262.977	75.643	262.958	75.8264	262.939	76.145
28.9527	262.369	99.9977	262.375	99.9998	262.38	100	262.397	84.6339	262.331	86.637	262.281	88.1218	262.975	75.6496	262.96	75.8043	262.939	76.133
28.9718	262.369	99.9977	262.375	99.9998	262.38	100	262.397	84.6287	262.331	86.6278	262.281	88.1182	262.976	75.6076	262.961	75.7834	262.939	76.119
28.9908	262.369	99.9977	262.375	99.9998	262.38	100	262.397	84.6432	262.332	86.607	262.281	88.1143	262.978	75.5742	262.961	75.7989	262.94	76.102
29.0099	262.369	99.9977	262.375	99.9998	262.38	100	262.397	84.6585	262.333	86.5768	262.28	88.1454	262.98	75.5597	262.96	75.7946	262.94	76.092
29.029	262.369	99.9977	262.375	99.9998	262.38	100	262.396	84.6714	262.332	86.581	262.279	88.1762	262.981	75.5617	262.959	75.792	262.94	76.1
29.048	262.369	99.9977	262.375	99.9998	262.38	100	262.396	84.678	262.332	86.5907	262.279	88.1981	262.981	75.5973	262.96	75.778	262.94	76.119
29.0671	262.369	99.9977	262.375	99.9998	262.38	100	262.396	84.6872	262.331	86.6244	262.278	88.2056	262.979	75.6458	262.962	75.7611	262.94	76.143
29.0862	262.369	99.9977	262.375	99.9998	262.38	100	262.396	84.6906	262.33	86.6528	262.279	88.1953	262.978	75.6702	262.963	75.7405	262.941	76.162
29.1053	262.369	99.9977	262.375	99.9998	262.38	100	262.395	84.7004	262.33	86.6557	262.279	88.1874	262.977	75.6806	262.962	75.7724	262.941	76.169
29.1243	262.369	99.9978	262.375	99.9998	262.38	100	262.395	84.7077	262.33	86.651	262.279	88.1901	262.976	75.6567	262.961	75.7879	262.941	76.161
29.1434	262.369	99.9978	262.375	99.9998	262.38	100	262.395	84.7061	262.331	86.6343	262.278	88.2148	262.976	75.6306	262.962	75.7879	262.941	76.143
29.1625	262.369	99.9978	262.375	99.9998	262.38	100	262.395	84.7011	262.331	86.632	262.277	88.2477	262.977	75.6082	262.962	75.792	262.941	76.118
29.1816	262.369	99.9978	262.375	99.9998	262.38	100	262.395	84.7035	262.331	86.6269	262.277	88.262	262.978	75.5773	262.961	75.79	262.94	76.101
29.2006	262.369	99.9978	262.375	99.9998	262.38	100	262.395	84.7175	262.33	86.6512	262.276	88.2657	262.98	75.5581	262.96	75.7915	262.94	76.091
29.2197	262.369	99.9978	262.375	99.9998	262.38	100	262.394	84.7295	262.33	86.656	262.276	88.285	262.98	75.5697	262.96	75.8032	262.94	76.086
29.2388	262.369	99.9978	262.375	99.9998	262.38	100	262.394	84.7384	262.33	86.67	262.277	88.2597	262.98	75.5814	262.96	75.7997	262.939	76.088
29.2579	262.369	99.9978	262.375	99.9998	262.38	100	262.393	84.7545	262.33	86.6583	262.277	88.2494	262.98	75.5833	262.96	75.7895	262.939	76.096
29.2769	262.369	99.9978	262.375	99.9998	262.38	100	262.393	84.763	262.33	86.6605	262.277	88.2435	262.979	75.5877	262.96	75.7959	262.94	76.101
29.296	262.369	99.9978	262.375	99.9998	262.38	100	262.393	84.7681	262.329	86.6758	262.277	88.2596	262.979	75.6009	262.96	75.7897	262.94	76.105
29.3151	262.369	99.9978	262.375	99.9998	262.38	100	262.393	84.7727	262.33	86.67	262.276	88.2668	262.979	75.5913	262.96	75.787	262.94	76.109
29.3342	262.369	99.9979	262.375	99.9998	262.38	100	262.393	84.772	262.33	86.6628	262.275	88.3054	262.979	75.6018	262.961	75.7763	262.94	76.112
29.3532	262.369	99.9979	262.375	99.9998	262.38	100	262.393	84.7666	262.33	86.6621	262.274	88.3568	262.979	75.6014	262.961	75.7644	262.94	76.116
29.3723	262.369	99.9979	262.375	99.9998	262.38	100	262.393	84.7766	262.33	86.6437	262.273	88.3876	262.978	75.6067	262.96	75.763	262.941	76.121
29.3914	262.369	99.9979	262.375	99.9998	262.38	100	262.393	84.7744	262.331	86.6339	262.273	88.3895	262.977	75.6174	262.962	75.7504	262.941	76.119
29.4105	262.369	99.9979	262.375	99.9998	262.38	100	262.393	84.7775	262.331	86.6315	262.273	88.3605	262.977	75.6168	262.964	75.7743	262.941	76.116
29.4295	262.369	99.9979	262.375	99.9998	262.38	100	262.392	84.7908	262.33	86.6415	262.274	88.3478	262.978	75.5937	262.962	75.8118	262.94	76.109
29.4486	262.369	99.9979	262.375	99.9998	262.38	100	262.392	84.7925	262.33	86.667	262.275	88.3233	262.978	75.5849	262.958	75.8676	262.939	76.103
29.4677	262.369	99.9979	262.375	99.9998	262.38	100	262.392	84.7949	262.329	86.684	262.274	88.3538	262.98	75.5733	262.957	75.8533	262.938	76.1
29.4867	262.369	99.9979	262.375	99.9998	262.38	100	262.392	84.7916	262.329	86.6729	262.272	88.3924	262.979	75.5883	262.957	75.8262	262.938	76.104
29.5058	262.369	99.9979	262.375	99.9998	262.38	100	262.392	84.7845	262.329	86.6897	262.271	88.4283	262.979	75.6014	262.959	75.7807	262.939	76.11
29.5249	262.369	99.9979	262.375	99.9998	262.38	100	262.392	84.7901	262.329	86.6725	262.271	88.4483	262.977	75.615	262.961	75.7574	262.939	76.115
29.544	262.369	99.998	262.375	99.9998	262.38	100	262.392	84.7887	262.33	86.6513	262.271	88.4357	262.977	75.6121	262.961	75.7384	262.941	76.114
29.563	262.369	99.998	262.375	99.9998	262.38	100	262.392	84.7896	262.33	86.6506	262.271	88.4284	262.978	75.5966	262.961	75.7489	262.941	76.11
29.5821	262.369	99.998	262.375	99.9998	262.38	100	262.392	84.7961	262.33	86.6455	262.272	88.4184	262.978	75.5832	262.963	75.7483	262.941	76.103
29.6012	262.369	99.998	262.375	99.9998	262.38	100	262.392	84.7962	262.329	86.6756	262.272	88.4192	262.979	75.5825	262.963	75.7522	262.941	76.1
29.6203	262.369	99.998	262.375	99.9998	262.38	100	262.392	84.7959	262.329	86.6815	262.271	88.4313	262.979	75.5834	262.961	75.7793	262.941	76.099
29.6393	262.369	99.998	262.375	99.9998	262.38	100	262.392	84.8149	262.329	86.6835	262.271	88.4422	262.979	75.5938	262.96	75.7759	262.941	76.101
29.6584	262.369	99.998	262.375	99.9998	262.38	100	262.392	84.8137	262.329	86.6901	262.271	88.4545	262.979	75.5945	262.96	75.7511	262.94	76.102
29.6775	262.369	99.998	262.375	99.9998	262.38	100	262.392	84.807	262.329	86.687	262.27	88.4587	262.979	75.5914	262.961	75.7515	262.941	76.101
29.6965	262.369	99.998	262.375	99.9998	262.38	100	262.392	84.7957	262.329	86.6987	262.27	88.4634	262.979	75.5873	262.962	75.7427	262.941	76.098
29.7156	262.369	99.998	262.375	99.9998	262.38	100	262.393	84.7803	262.328	86.7067	262.27	88.4607	262.978	75.5797	262.962	75.7583	262.94	76.093
29.7347	262.369	99.998	262.375	99.9998	262.38	100	262.393	84.7704	262.328	86.7276	262.271	88.4459	262.978	75.5795	262.96	75.8008	262.94	76.087
29.7538	262.369	99.998	262.375	99.9998	262.38	100	262.393	84.7781	262.327	86.7446	262.27	88.4597	262.979	75.5674	262.958	75.8042	262.939	76.085
29.7728	262.369	99.9981	262.375	99.9998	262.38	100	262.392	84.7852	262.327	86.7572	262.27	88.4653	262.98	75.5617	262.958	75.7733	262.939	76.089
29.7919	262.369	99.9981	262.375	99.9998	262.38	100	262.393	84.7782	262.327	86.7409	262.27	88.4708	262.98	75.5754	262.96	75.7374	262.94	76.099
29.811	262.369	99.9981	262.375	99.9998	262.38	100	262.393	84.776	262.328	86.7348	262.27	88.4671	262.98	75.6002	262.962	75.7171	262.941	76.113
29.8301	262.369	99.9981	262.375	99.9998	262.38	100	262.393	84.7713	262.328	86.7221	262.271	88.4464	262.978	75.6328	262.964	75.7274	262.941	76.125
29.8491	262.369	99.9981	262.375	99.9998	262.38	100	262.393	84.7748	262.328	86.7097	262.272	88.4175	262.977	75.6356	262.963	75.7629	262.941	76.13
29.8682	262.369	99.9981	262.375	99.9998	262.38	100	262.392	84.7884	262.328	86.7153	262.272	88.401	262.977	75.6218	262.96	75.8085	262.94	76.129
29.8873	262.369	99.9981	262.375	99.9998	262.38	100	262.392	84.7994	262.327	86.748	262.272	88.4191	262.977	75.6022	262.959	75.8012	262.94	76.122
29.9064	262.369	99.9981	262.375	99.9998	262.38	100	262.392	84.8134	262.327	86.7644	262.271	88.4393	262.978	75.5946	262.959	75.7882	262.94	76.117
29.9254	262.369	99.9981	262.375	99.9998	262.38	100	262.391	84.8362	262.326	86.7666	262.271	88.4455	262.979	75.5947	262.96	75.7694	262.94	76.115
29.9445	262.369	99.9981	262.375	99.9998	262.38	100	262.391	84.8353	262.327	86.7641	262.27	88.4609	262.979	75.6103	262.963	75.7423	262.94	76.119
29.9636	262.369	99.9981	262.375	99.9998	262.38	100	262.391	84.8233	262.327	86.7595	262.271	88.4287	262.978	75.6143	262.962	75.7367	262.94	76.124
29.9826	262.369	99.9981	262.375	99.9998	262.38	100	262.392	84.8053	262.327	86.74	262.272	88.4156	262.977	75.6227	262.959	75.7799	262.94	76.126
30.0017	262.369	99.9982	262.375	99.9998	262.38	100	262.392	84.7943	262.328	86.7349	262.272	88.4045	262.977	75.6186	262.958	75.7886	262.94	76.121
30.0208	262.369	99.9982	262.375	99.9998	262.38	100	262.392	84.7989	262.326	86.7738	262.272	88.4169	262.977	75.6052	262.96	75.7727	262.94	76.115
30.0399	262.369	99.9982	262.375	99.9998	262.38	100	262.392	84.811	262.326	86.7928	262.271	88.4325	262.978	75.5861	262.962	75.7586	262.94	76.109
30.0589	262.369	99.9982	262.375	99.9998	262.38	100	262.391	84.8221	262.326	86.7834	262.271	88.4422	262.979	75.5842	262.963	75.7804	262.94	76.103
30.078	262.369	99.9982	262.375	99.9998	262.38	100	262.391	84.8255	262.326	86.7748	262.271	88.441	262.979	75.5898	262.961	75.8054	262.939	76.103
30.0971	262.369	99.9982	262.375	99.9998	262.38	100	262.391	84.8333	262.326	86.7711	262.272	88.4177	262.98	75.5905	262.956	75.8419	262.938	76.108
30.1162	262.369	99.9982	262.375	99.9998	262.38	100	262.39	84.8466	262.326	86.7725	262.271	88.4321	262.979	75.6045	262.955	75.8585	262.937	76.112
30.1352	262.369	99.9982	262.375	99.9998	262.38	100	262.39	84.8489	262.326	86.7894	262.271	88.4426	262.978	75.6094	262.957	75.8141	262.937	76.115
30.1543	262.369	99.9982	262.375	99.9998	262.38	100	262.39	84.8671	262.326	86.7835	262.27	88.4639	262.977	75.6039	262.959	75.782	262.938	76.116
30.1734	262.369	99.9982	262.375	99.9998	262.38	100	262.389	84.8859	262.326	86.7746	262.27	88.4725	262.977	75.609	262.961	75.7663	262.938	76.11
30.1925	262.369	99.9982	262.375	99.9998	262.38	100	262.389	84.8846	262.326	86.7729	262.269	88.4875	262.977	75.5946	262.96	75.8105	262.939	76.101
30.2115	262.369	99.9982	262.375	99.9998	262.38	100	262.389	84.8874	262.326	86.7784	262.27	88.4827	262.979	75.5712	262.958	75.8518	262.938	76.097
30.2306	262.369	99.9982	262.375	99.9998	262.38	100	262.389	84.8948	262.326	86.7748	262.27	88.4818	262.98	75.5684	262.957	75.8799	262.938	76.1
30.2497	262.369	99.9983	262.375	99.9998	262.38	100	262.389	84.8812	262.326	86.7766	262.27	88.4687	262.981	75.5833	262.958	75.8726	262.937	76.112
30.2688	262.369	99.9983	262.375	99.9998	262.38	100	262.39	84.874	262.326	86.7837	262.27	88.4819	262.979	75.6208	262.959	75.8538	262.937	76.131
30.2878	262.369	99.9983	262.375	99.9998	262.38	100	262.39	84.8709	262.325	86.8059	262.269	88.4976	262.977	75.6564	262.957	75.854	262.937	76.148
30.3069	262.369	99.9983	262.375	99.9998	262.38	100	262.39	84.8716	262.325	86.8114	262.269	88.5033	262.975	75.6686	262.957	75.8458	262.937	76.157
30.326	262.369	99.9983	262.375	99.9998	262.38	100	262.39	84.8678	262.325	86.8052	262.269	88.5052	262.976	75.6497	262.957	75.8281	262.937	76.155
30.3451	262.369	99.9983	262.375	99.9998	262.38	100	262.39	84.8762	262.326	86.7958	262.269	88.5072	262.977	75.6321	262.958	75.8045	262.938	76.147
30.3641	262.369	99.9983	262.375	99.9998	262.38	100	262.389	84.8822	262.325	86.8068	262.269	88.5028	262.978	75.6111	262.959	75.7934	262.938	76.139
30.3832	262.369	99.9983	262.375	99.9998	262.38	100	262.389	84.8889	262.325	86.8208	262.269	88.5016	262.979	75.6117	262.961	75.785	262.939	76.137
30.4023	262.369	99.9983	262.375	99.9999	262.38	100	262.389	84.8938	262.325	86.8172	262.269	88.5067	262.978	75.633	262.96	75.8039	262.939	76.146
30.4213	262.369	99.9983	262.375	99.9999	262.38	100	262.388	84.916	262.325	86.8061	262.268	88.5228	262.977	75.6391	262.959	75.8132	262.939	76.154
30.4404	262.369	99.9983	262.375	99.9999	262.38	100	262.388	84.9148	262.325	86.801	262.269	88.5114	262.976	75.6735	262.959	75.8231	262.939	76.16
30.4595	262.369	99.9983	262.375	99.9999	262.38	100	262.389	84.9052	262.325	86.8045	262.269	88.4978	262.977	75.6507	262.959	75.7961	262.939	76.161
30.4786	262.369	99.9983	262.375	99.9999	262.38	100	262.389	84.8983	262.325	86.8149	262.269	88.5139	262.978	75.643	262.961	75.801	262.94	76.159
30.4976	262.369	99.9984	262.375	99.9999	262.38	100	262.389	84.8897	262.324	86.8378	262.269	88.5017	262.977	75.6376	262.962	75.7931	262.94	76.147
30.5167	262.369	99.9984	262.375	99.9999	262.38	100	262.389	84.8935	262.323	86.8663	262.269	88.5065	262.977	75.6327	262.961	75.8233	262.939	76.137
30.5358	262.369	99.9984	262.375	99.9999	262.38	100	262.389	84.9082	262.323	86.8922	262.269	88.4955	262.976	75.6129	262.958	75.856	262.939	76.124
30.5549	262.369	99.9984	262.375	99.9999	262.38	100	262.388	84.9226	262.322	86.898	262.27	88.4864	262.977	75.5988	262.957	75.8389	262.938	76.108
30.5739	262.369	99.9984	262.375	99.9999	262.38	100	262.388	84.9374	262.322	86.8937	262.27	88.4787	262.978	75.5802	262.958	75.8068	262.938	76.096
30.593	262.369	99.9984	262.375	99.9999	262.38	100	262.388	84.9386	262.323	86.8828	262.269	88.5015	262.98	75.5541	262.96	75.7746	262.939	76.093
30.6121	262.369	99.9984	262.375	99.9999	262.38	100	262.387	84.9454	262.323	86.8895	262.268	88.5277	262.981	75.5768	262.962	75.7517	262.94	76.097
30.6312	262.369	99.9984	262.375	99.9999	262.38	100	262.388	84.9336	262.322	86.9064	262.267	88.5606	262.98	75.5934	262.962	75.7951	262.94	76.112
30.6502	262.369	99.9984	262.375	99.9999	262.38	100	262.388	84.9204	262.322	86.9216	262.266	88.5832	262.978	75.6218	262.96	75.8332	262.939	76.129
30.6693	262.369	99.9984	262.375	99.9999	262.38	100	262.388	84.9103	262.321	86.9322	262.266	88.5922	262.976	75.6552	262.959	75.8529	262.938	76.138
30.6884	262.368	99.9984	262.375	99.9999	262.38	100	262.388	84.9175	262.321	86.9295	262.267	88.5817	262.978	75.6384	262.957	75.8555	262.938	76.142
30.7075	262.368	99.9984	262.375	99.9999	262.38	100	262.388	84.9381	262.321	86.9421	262.266	88.5847	262.979	75.6195	262.957	75.8538	262.938	76.142
30.7265	262.368	99.9984	262.375	99.9999	262.38	100	262.387	84.9611	262.321	86.9455	262.266	88.608	262.979	75.6161	262.96	75.8163	262.938	76.135
30.7456	262.368	99.9984	262.375	99.9999	262.38	100	262.386	84.9862	262.32	86.9682	262.266	88.6046	262.978	75.6222	262.961	75.8089	262.939	76.132
30.7647	262.368	99.9984	262.375	99.9999	262.38	100	262.386	84.9944	262.32	86.9682	262.266	88.5932	262.977	75.6174	262.959	75.8336	262.939	76.13
30.7837	262.368	99.9985	262.375	99.9999	262.38	100	262.386	84.9922	262.32	86.9782	262.266	88.606	262.976	75.6246	262.96	75.8438	262.938	76.126
30.8028	262.368	99.9985	262.375	99.9999	262.38	100	262.386	84.9995	262.32	86.972	262.266	88.6001	262.977	75.6083	262.957	75.8333	262.938	76.123
30.8219	262.368	99.9985	262.375	99.9999	262.38	100	262.386	85.0006	262.32	86.9595	262.266	88.5921	262.979	75.5987	262.958	75.8562	262.938	76.125
30.841	262.368	99.9985	262.375	99.9999	262.38	100	262.385	85.0047	262.321	86.9535	262.266	88.5922	262.979	75.6079	262.959	75.8357	262.938	76.13
30.86	262.368	99.9985	262.375	99.9999	262.38	100	262.386	84.999	262.321	86.9471	262.266	88.593	262.98	75.6238	262.96	75.8278	262.938	76.144
30.8791	262.368	99.9985	262.375	99.9999	262.38	100	262.385	85.0055	262.321	86.9551	262.265	88.6153	262.978	75.6541	262.96	75.8677	262.938	76.159
30.8982	262.368	99.9985	262.375	99.9999	262.38	100	262.385	85.0086	262.32	86.9655	262.265	88.6235	262.977	75.6766	262.957	75.9037	262.937	76.171
30.9172	262.368	99.9985	262.375	99.9999	262.38	100	262.385	85.0047	262.32	86.9743	262.265	88.6278	262.976	75.6714	262.955	75.8879	262.937	76.177
30.9363	262.368	99.9985	262.375	99.9999	262.38	100	262.386	84.9965	262.32	86.9704	262.265	88.6257	262.976	75.6696	262.956	75.874	262.937	76.174
30.9554	262.368	99.9985	262.375	99.9999	262.38	100	262.386	85.0019	262.32	86.9711	262.265	88.6252	262.976	75.6543	262.959	75.8424	262.938	76.168
30.9745	262.368	99.9985	262.375	99.9999	262.38	100	262.385	85.0052	262.32	86.9631	262.266	88.613	262.977	75.6398	262.96	75.8287	262.938	76.163
30.9935	262.368	99.9985	262.375	99.9999	262.38	100	262.385	85.0206	262.32	86.9655	262.265	88.6164	262.976	75.6448	262.96	75.8537	262.938	76.161
31.0126	262.368	99.9985	262.375	99.9999	262.38	100	262.384	85.0386	262.32	86.9718	262.265	88.6322	262.976	75.6471	262.958	75.8815	262.938	76.159
31.0317	262.368	99.9985	262.375	99.9999	262.38	100	262.384	85.0536	262.319	86.9902	262.264	88.66	262.976	75.6571	262.956	75.8614	262.937	76.159
31.0508	262.368	99.9985	262.375	99.9999	262.38	100	262.384	85.0484	262.318	87.0278	262.264	88.6656	262.977	75.6488	262.956	75.8452	262.937	76.158
31.0698	262.368	99.9986	262.375	99.9999	262.38	100	262.384	85.0462	262.318	87.0435	262.264	88.6669	262.977	75.638	262.959	75.806	262.938	76.155
31.0889	262.368	99.9986	262.375	99.9999	262.38	100	262.384	85.0434	262.318	87.0385	262.264	88.6654	262.977	75.6371	262.961	75.7684	262.939	76.153
31.108	262.368	99.9986	262.375	99.9999	262.38	100	262.384	85.046	262.318	87.0287	262.264	88.659	262.978	75.6347	262.961	75.7877	262.94	76.154
31.1271	262.368	99.9986	262.375	99.9999	262.38	100	262.384	85.0518	262.319	86.9937	262.264	88.6573	262.977	75.6464	262.96	75.8157	262.94	76.154
31.1461	262.368	99.9986	262.375	99.9999	262.38	100	262.383	85.0698	262.32	86.9779	262.265	88.6445	262.977	75.6532	262.959	75.8412	262.939	76.155
31.1652	262.368	99.9986	262.375	99.9999	262.38	100	262.383	85.0657	262.32	86.983	262.264	88.6612	262.977	75.6416	262.96	75.8582	262.939	76.159
31.1843	262.368	99.9986	262.375	99.9999	262.38	100	262.384	85.0644	262.319	87.0024	262.264	88.675	262.976	75.6413	262.959	75.8434	262.939	76.154
31.2034	262.368	99.9986	262.375	99.9999	262.38	100	262.383	85.0707	262.318	87.04	262.263	88.6898	262.976	75.6523	262.959	75.844	262.938	76.144
31.2224	262.368	99.9986	262.375	99.9999	262.38	100	262.383	85.0755	262.317	87.073	262.263	88.6986	262.977	75.6235	262.959	75.8339	262.938	76.138
31.2415	262.368	99.9986	262.375	99.9999	262.38	100	262.383	85.0855	262.317	87.0745	262.262	88.7125	262.978	75.603	262.959	75.8238	262.939	76.13
31.2606	262.368	99.9986	262.375	99.9999	262.38	100	262.383	85.0945	262.317	87.0771	262.262	88.714	262.978	75.6117	262.96	75.8296	262.939	76.122
31.2797	262.368	99.9986	262.375	99.9999	262.38	100	262.382	85.1031	262.317	87.0615	262.262	88.7197	262.979	75.5986	262.961	75.8255	262.939	76.122
31.2987	262.368	99.9986	262.375	99.9999	262.38	100	262.382	85.1156	262.317	87.0593	262.261	88.7469	262.979	75.6129	262.96	75.83	262.939	76.129
31.3178	262.368	99.9986	262.375	99.9999	262.38	100	262.382	85.1234	262.317	87.0773	262.26	88.7835	262.979	75.6244	262.959	75.8479	262.939	76.138
31.3369	262.368	99.9986	262.375	99.9999	262.38	100	262.382	85.1159	262.316	87.1072	262.26	88.7893	262.979	75.6375	262.958	75.8526	262.938	76.152
31.3559	262.368	99.9986	262.375	99.9999	262.38	100	262.382	85.1166	262.315	87.1346	262.26	88.7971	262.977	75.6581	262.958	75.8839	262.938	76.16
31.375	262.368	99.9986	262.375	99.9999	262.38	100	262.382	85.1131	262.315	87.1398	262.26	88.7906	262.975	75.6652	262.959	75.8606	262.938	76.16
31.3941	262.368	99.9987	262.375	99.9999	262.38	100	262.382	85.1184	262.315	87.1309	262.261	88.7669	262.975	75.6574	262.959	75.8466	262.938	76.151
31.4132	262.368	99.9987	262.375	99.9999	262.38	100	262.382	85.1169	262.315	87.1204	262.261	88.7595	262.976	75.6227	262.959	75.8662	262.938	76.133
31.4322	262.368	99.9987	262.375	99.9999	262.38	100	262.382	85.1038	262.316	87.1091	262.261	88.7692	262.978	75.5923	262.959	75.8799	262.938	76.117
31.4513	262.368	99.9987	262.375	99.9999	262.38	100	262.383	85.0922	262.315	87.1136	262.26	88.8034	262.98	75.5699	262.959	75.8682	262.938	76.109
31.4704	262.368	99.9987	262.375	99.9999	262.38	100	262.383	85.0937	262.315	87.1268	262.259	88.8227	262.98	75.5851	262.958	75.8875	262.938	76.114
31.4895	262.368	99.9987	262.375	99.9999	262.38	100	262.383	85.0818	262.314	87.1533	262.259	88.8346	262.98	75.6162	262.958	75.8825	262.938	76.128
31.5085	262.368	99.9987	262.375	99.9999	262.38	100	262.383	85.0819	262.314	87.1736	262.259	88.8346	262.979	75.6482	262.959	75.8551	262.938	76.146
31.5276	262.368	99.9987	262.375	99.9999	262.38	100	262.383	85.0833	262.314	87.1721	262.258	88.8634	262.979	75.6594	262.958	75.8525	262.938	76.162
31.5467	262.368	99.9987	262.375	99.9999	262.38	100	262.383	85.0736	262.314	87.1688	262.257	88.8888	262.977	75.6611	262.958	75.8445	262.938	76.168
31.5658	262.368	99.9987	262.375	99.9999	262.38	100	262.383	85.0672	262.314	87.1683	262.257	88.8972	262.977	75.6642	262.959	75.8228	262.939	76.166
31.5848	262.368	99.9987	262.375	99.9999	262.38	100	262.384	85.0631	262.314	87.1703	262.257	88.8898	262.976	75.648	262.96	75.8244	262.939	76.156
31.6039	262.368	99.9987	262.375	99.9999	262.38	100	262.383	85.0808	262.314	87.1656	262.258	88.8586	262.976	75.6387	262.962	75.8438	262.939	76.141
31.623	262.368	99.9987	262.375	99.9999	262.38	100	262.382	85.096	262.314	87.1636	262.257	88.8852	262.977	75.6102	262.96	75.8615	262.939	76.124
31.6421	262.368	99.9987	262.375	99.9999	262.38	100	262.382	85.1016	262.314	87.1623	262.257	88.882	262.978	75.5827	262.958	75.8849	262.938	76.108
31.6611	262.368	99.9987	262.375	99.9999	262.38	100	262.382	85.1086	262.314	87.1627	262.256	88.9081	262.979	75.5789	262.956	75.9135	262.938	76.093
31.6802	262.368	99.9987	262.375	99.9999	262.38	100	262.382	85.109	262.314	87.1734	262.256	88.9259	262.98	75.5696	262.957	75.8891	262.938	76.084
31.6993	262.368	99.9987	262.375	99.9999	262.38	100	262.383	85.0943	262.313	87.2004	262.255	88.9331	262.981	75.5617	262.96	75.856	262.938	76.082
31.7183	262.368	99.9987	262.375	99.9999	262.38	100	262.383	85.085	262.313	87.2062	262.256	88.9157	262.981	75.5654	262.96	75.8562	262.937	76.084
31.7374	262.368	99.9988	262.375	99.9999	262.38	100	262.383	85.0872	262.313	87.1864	262.256	88.9031	262.981	75.5747	262.958	75.8794	262.937	76.089
31.7565	262.368	99.9988	262.375	99.9999	262.38	100	262.382	85.0958	262.314	87.171	262.256	88.9081	262.98	75.5913	262.956	75.8998	262.937	76.097
31.7756	262.368	99.9988	262.375	99.9999	262.38	100	262.382	85.1121	262.314	87.1597	262.256	88.9281	262.979	75.5921	262.956	75.8742	262.937	76.104
31.7946	262.368	99.9988	262.375	99.9999	262.38	100	262.382	85.1235	262.314	87.1654	262.255	88.9337	262.977	75.6014	262.958	75.8596	262.937	76.104
31.8137	262.368	99.9988	262.375	99.9999	262.38	100	262.382	85.1237	262.313	87.1953	262.255	88.9406	262.978	75.6027	262.961	75.846	262.938	76.097
31.8328	262.368	99.9988	262.375	99.9999	262.38	100	262.382	85.118	262.312	87.2122	262.256	88.9067	262.979	75.5731	262.96	75.8481	262.938	76.091
31.8518	262.368	99.9988	262.375	99.9999	262.38	100	262.382	85.1214	262.312	87.2364	262.256	88.9158	262.98	75.5562	262.957	75.8875	262.938	76.085
31.8709	262.368	99.9988	262.375	99.9999	262.38	100	262.381	85.1329	262.312	87.2202	262.256	88.9087	262.98	75.5644	262.956	75.864	262.937	76.079
31.89	262.368	99.9988	262.375	99.9999	262.38	100	262.381	85.1485	262.313	87.204	262.256	88.9279	262.979	75.5681	262.957	75.8448	262.938	76.08
31.9091	262.368	99.9988	262.375	99.9999	262.38	100	262.38	85.1613	262.313	87.2012	262.255	88.944	262.979	75.5757	262.959	75.8065	262.939	76.083
31.9281	262.368	99.9988	262.375	99.9999	262.38	100	262.38	85.1649	262.313	87.1924	262.255	88.9444	262.978	75.577	262.961	75.7867	262.939	76.082
31.9472	262.368	99.9988	262.375	99.9999	262.38	100	262.38	85.172	262.313	87.1942	262.255	88.9435	262.979	75.5681	262.962	75.8066	262.939	76.08
31.9663	262.368	99.9988	262.375	99.9999	262.38	100	262.38	85.1596	262.312	87.2096	262.256	88.9226	262.98	75.5621	262.96	75.8359	262.939	76.078
31.9854	262.368	99.9988	262.375	99.9999	262.38	100	262.381	85.1455	262.312	87.221	262.255	88.9366	262.981	75.558	262.957	75.8676	262.939	76.079
32.0053	262.368	99.9988	262.375	99.9999	262.38	100	262.381	85.143	262.313	87.1985	262.256	88.9248	262.981	75.5666	262.959	75.8237	262.939	76.084
32.0282	262.368	99.9988	262.375	99.9999	262.38	100	262.381	85.1478	262.313	87.1882	262.256	88.9258	262.98	75.5827	262.961	75.7989	262.94	76.09
32.0511	262.368	99.9988	262.375	99.9999	262.38	100	262.38	85.1678	262.314	87.1741	262.256	88.9137	262.98	75.592	262.962	75.7951	262.94	76.099
32.074	262.368	99.9988	262.375	99.9999	262.38	100	262.38	85.1806	262.313	87.1877	262.256	88.9219	262.979	75.5932	262.961	75.8361	262.939	76.104
32.0969	262.368	99.9988	262.375	99.9999	262.38	100	262.38	85.1825	262.312	87.2135	262.256	88.9133	262.978	75.602	262.958	75.8437	262.938	76.103
32.1198	262.368	99.9989	262.375	99.9999	262.38	100	262.38	85.1819	262.312	87.2377	262.256	88.9194	262.978	75.5924	262.956	75.8661	262.938	76.096
32.1427	262.368	99.9989	262.375	99.9999	262.38	100	262.38	85.1853	262.311	87.2436	262.256	88.9176	262.979	75.5739	262.956	75.8628	262.938	76.089
32.1656	262.368	99.9989	262.375	99.9999	262.38	100	262.38	85.1856	262.312	87.2336	262.256	88.9079	262.98	75.5609	262.959	75.828	262.938	76.082
32.1884	262.368	99.9989	262.375	99.9999	262.38	100	262.38	85.1708	262.312	87.2298	262.257	88.8982	262.981	75.5546	262.961	75.8248	262.938	76.081
32.2113	262.368	99.9989	262.375	99.9999	262.38	100	262.38	85.1784	262.312	87.2122	262.256	88.9162	262.981	75.5707	262.959	75.8865	262.937	76.086
32.2342	262.368	99.9989	262.375	99.9999	262.38	100	262.379	85.1916	262.313	87.2064	262.255	88.934	262.98	75.5875	262.956	75.9416	262.936	76.093
32.2571	262.368	99.9989	262.375	99.9999	262.38	100	262.379	85.1997	262.312	87.2334	262.255	88.9635	262.98	75.5976	262.954	75.9728	262.935	76.101
32.28	262.368	99.9989	262.375	99.9999	262.38	100	262.379	85.2083	262.311	87.2524	262.254	88.9691	262.98	75.5929	262.954	75.9443	262.935	76.106
32.3029	262.368	99.9989	262.375	99.9999	262.38	100	262.379	85.2096	262.311	87.2471	262.255	88.9599	262.979	75.5944	262.955	75.9055	262.935	76.105
32.3258	262.368	99.9989	262.375	99.9999	262.38	100	262.379	85.2049	262.311	87.2408	262.255	88.9601	262.978	75.6001	262.958	75.8801	262.936	76.098
32.3486	262.368	99.9989	262.375	99.9999	262.38	100	262.379	85.1981	262.312	87.2379	262.254	88.9677	262.979	75.5785	262.959	75.8628	262.937	76.095
32.3715	262.368	99.9989	262.375	99.9999	262.38	100	262.379	85.1961	262.312	87.2326	262.253	88.9971	262.979	75.5666	262.958	75.8652	262.937	76.093
32.3944	262.368	99.9989	262.375	99.9999	262.38	100	262.379	85.2154	262.312	87.2296	262.253	89.0068	262.979	75.5759	262.956	75.885	262.937	76.088
32.4173	262.368	99.9989	262.375	99.9999	262.38	100	262.378	85.2282	262.311	87.2564	262.253	89.0171	262.979	75.5832	262.956	75.8755	262.937	76.088
32.4402	262.368	99.9989	262.375	99.9999	262.38	100	262.378	85.2343	262.31	87.2785	262.253	89.0082	262.979	75.577	262.958	75.8461	262.938	76.09
32.4631	262.368	99.9989	262.375	99.9999	262.38	100	262.378	85.233	262.31	87.2963	262.254	88.9883	262.98	75.5777	262.96	75.8215	262.938	76.092
32.486	262.368	99.9989	262.375	99.9999	262.38	100	262.378	85.2324	262.309	87.3063	262.254	88.9925	262.98	75.5777	262.961	75.8291	262.938	76.093
32.5089	262.368	99.9989	262.375	99.9999	262.38	100	262.378	85.2423	262.31	87.2989	262.253	89.0075	262.979	75.583	262.96	75.8486	262.938	76.093
32.5318	262.368	99.9989	262.375	99.9999	262.38	100	262.378	85.2375	262.31	87.2989	262.253	89.0142	262.978	75.5885	262.957	75.8644	262.938	76.088
32.5547	262.368	99.9989	262.375	99.9999	262.38	100	262.378	85.2379	262.31	87.2908	262.253	89.023	262.978	75.5771	262.958	75.8334	262.939	76.081
32.5775	262.368	99.9989	262.375	99.9999	262.38	100	262.378	85.2334	262.31	87.3019	262.253	89.0241	262.979	75.5537	262.96	75.8019	262.939	76.074
32.6004	262.368	99.9989	262.375	99.9999	262.38	100	262.378	85.2342	262.309	87.3194	262.252	89.0455	262.98	75.5449	262.961	75.768	262.94	76.066
32.6233	262.368	99.999	262.375	99.9999	262.38	100	262.378	85.2399	262.309	87.3085	262.252	89.0594	262.98	75.5471	262.962	75.7444	262.941	76.064
32.6462	262.368	99.999	262.375	99.9999	262.38	100	262.377	85.2524	262.31	87.3015	262.251	89.0722	262.98	75.5489	262.962	75.7768	262.941	76.072
32.6691	262.368	99.999	262.375	99.9999	262.38	100	262.377	85.2716	262.31	87.2904	262.251	89.0674	262.98	75.5679	262.962	75.7758	262.941	76.083
32.692	262.368	99.999	262.375	99.9999	262.38	100	262.377	85.2818	262.31	87.2951	262.251	89.062	262.979	75.5909	262.962	75.7839	262.941	76.093
32.7149	262.368	99.999	262.375	99.9999	262.38	100	262.376	85.2878	262.31	87.2909	262.252	89.0548	262.979	75.6021	262.961	75.7879	262.941	76.102
32.7377	262.368	99.999	262.375	99.9999	262.38	100	262.376	85.2862	262.31	87.2789	262.251	89.0666	262.979	75.5943	262.96	75.8014	262.94	76.109
32.7606	262.368	99.999	262.375	99.9999	262.38	100	262.376	85.2862	262.31	87.2908	262.252	89.0578	262.979	75.5949	262.96	75.7907	262.94	76.111
32.7835	262.368	99.999	262.375	99.9999	262.38	100	262.376	85.2924	262.31	87.2855	262.251	89.0736	262.979	75.6042	262.961	75.7864	262.94	76.113
32.8064	262.368	99.999	262.375	99.9999	262.38	100	262.376	85.2902	262.31	87.2972	262.251	89.0716	262.978	75.6009	262.961	75.7908	262.94	76.117
32.8293	262.368	99.999	262.375	99.9999	262.38	100	262.377	85.2791	262.309	87.326	262.251	89.0913	262.977	75.6121	262.961	75.7717	262.94	76.115
32.8522	262.368	99.999	262.375	99.9999	262.38	100	262.376	85.2978	262.308	87.3375	262.25	89.1073	262.977	75.6124	262.96	75.7697	262.94	76.109
32.8751	262.368	99.999	262.375	99.9999	262.38	100	262.376	85.301	262.308	87.3638	262.249	89.1286	262.978	75.5858	262.961	75.7747	262.941	76.102
32.898	262.368	99.999	262.375	99.9999	262.38	100	262.375	85.3158	262.308	87.3625	262.249	89.1251	262.979	75.5735	262.962	75.7657	262.941	76.098
32.9209	262.368	99.999	262.375	99.9999	262.38	100	262.375	85.3243	262.308	87.3456	262.249	89.1248	262.979	75.5689	262.962	75.7418	262.941	76.095
32.9437	262.368	99.999	262.375	99.9999	262.38	100	262.375	85.3227	262.308	87.35	262.25	89.1147	262.979	75.5922	262.962	75.7615	262.941	76.099
32.9666	262.368	99.999	262.375	99.9999	262.38	100	262.375	85.3277	262.308	87.3491	262.25	89.1156	262.978	75.5944	262.962	75.7546	262.941	76.105
32.9895	262.368	99.999	262.375	99.9999	262.38	100	262.375	85.3274	262.308	87.3374	262.249	89.1246	262.978	75.6065	262.962	75.7562	262.942	76.112
33.0124	262.368	99.999	262.375	99.9999	262.38	100	262.375	85.3307	262.308	87.3482	262.249	89.1324	262.979	75.6019	262.962	75.7427	262.942	76.116
33.0353	262.368	99.999	262.375	99.9999	262.38	100	262.375	85.341	262.308	87.3538	262.249	89.1306	262.98	75.6051	262.963	75.7366	262.942	76.122
33.0582	262.368	99.999	262.375	99.9999	262.38	100	262.375	85.3409	262.308	87.3517	262.249	89.1385	262.978	75.6133	262.964	75.7471	262.942	76.127
33.0811	262.368	99.999	262.375	99.9999	262.38	100	262.375	85.3386	262.308	87.3655	262.249	89.1463	262.978	75.6228	262.963	75.7727	262.942	76.131
33.104	262.368	99.999	262.375	99.9999	262.38	100	262.375	85.3233	262.307	87.374	262.249	89.1427	262.976	75.6333	262.962	75.7917	262.941	76.132
33.1268	262.368	99.999	262.375	99.9999	262.38	100	262.375	85.3302	262.307	87.371	262.249	89.1313	262.977	75.6207	262.96	75.8027	262.941	76.132
33.1497	262.368	99.9991	262.375	99.9999	262.38	100	262.375	85.3275	262.308	87.3544	262.249	89.1249	262.978	75.6102	262.96	75.7949	262.94	76.131
33.1726	262.368	99.9991	262.375	99.9999	262.38	100	262.375	85.3154	262.308	87.3497	262.249	89.1332	262.978	75.6126	262.961	75.7844	262.94	76.131
33.1955	262.368	99.9991	262.375	99.9999	262.38	100	262.376	85.3107	262.308	87.3622	262.249	89.1277	262.978	75.62	262.96	75.7621	262.94	76.136
33.2184	262.368	99.9991	262.375	99.9999	262.38	100	262.375	85.3144	262.307	87.3679	262.249	89.1312	262.978	75.6323	262.96	75.7558	262.94	76.144
33.2413	262.368	99.9991	262.375	99.9999	262.38	100	262.375	85.3172	262.307	87.3844	262.249	89.1391	262.978	75.6469	262.961	75.7475	262.94	76.154
33.2642	262.368	99.9991	262.375	99.9999	262.38	100	262.375	85.3285	262.307	87.3922	262.249	89.1392	262.978	75.6496	262.961	75.7487	262.94	76.164
33.2871	262.368	99.9991	262.375	99.9999	262.38	100	262.375	85.3369	262.307	87.394	262.25	89.1221	262.977	75.6633	262.961	75.7623	262.941	76.171
33.31	262.368	99.9991	262.375	99.9999	262.38	100	262.374	85.3546	262.306	87.4162	262.249	89.1307	262.976	75.6686	262.962	75.728	262.941	76.174
33.3328	262.368	99.9991	262.375	99.9999	262.38	100	262.374	85.3681	262.305	87.4315	262.248	89.1575	262.976	75.6651	262.962	75.7204	262.941	76.172
33.3557	262.368	99.9991	262.375	99.9999	262.38	100	262.373	85.381	262.305	87.4438	262.247	89.1992	262.977	75.6617	262.962	75.7344	262.941	76.165
33.3786	262.368	99.9991	262.375	99.9999	262.38	100	262.373	85.3883	262.304	87.4649	262.246	89.2208	262.976	75.6397	262.963	75.7428	262.941	76.155
33.4015	262.368	99.9991	262.375	99.9999	262.38	100	262.373	85.3802	262.304	87.4676	262.246	89.2276	262.977	75.6302	262.962	75.7505	262.941	76.144
33.4244	262.368	99.9991	262.375	99.9999	262.38	100	262.374	85.3721	262.304	87.484	262.246	89.2361	262.978	75.6173	262.961	75.7767	262.941	76.135
33.4473	262.368	99.9991	262.375	99.9999	262.38	100	262.374	85.3622	262.303	87.4929	262.246	89.2267	262.978	75.6136	262.961	75.7581	262.94	76.13
33.4702	262.368	99.9991	262.375	99.9999	262.38	100	262.374	85.3646	262.303	87.4922	262.247	89.2161	262.978	75.6132	262.961	75.7478	262.941	76.123
33.4931	262.368	99.9991	262.375	99.9999	262.38	100	262.374	85.3641	262.303	87.4954	262.247	89.2168	262.978	75.6136	262.961	75.7326	262.941	76.116
33.5159	262.368	99.9991	262.375	99.9999	262.38	100	262.373	85.3817	262.303	87.5096	262.247	89.2034	262.978	75.5954	262.962	75.7124	262.941	76.111
33.5388	262.368	99.9991	262.375	99.9999	262.38	100	262.373	85.3865	262.303	87.5007	262.248	89.182	262.978	75.5865	262.962	75.7101	262.942	76.103
33.5617	262.368	99.9991	262.375	99.9999	262.38	100	262.373	85.4057	262.303	87.5017	262.248	89.1605	262.979	75.5846	262.963	75.7154	262.942	76.094
33.5846	262.368	99.9991	262.375	99.9999	262.38	100	262.372	85.418	262.303	87.5086	262.248	89.174	262.979	75.5768	262.963	75.7374	262.942	76.09
33.6075	262.368	99.9991	262.375	99.9999	262.38	100	262.372	85.4224	262.303	87.5231	262.247	89.194	262.98	75.5678	262.963	75.738	262.941	76.088
33.6304	262.368	99.9991	262.375	99.9999	262.38	100	262.372	85.4293	262.302	87.5438	262.247	89.2169	262.981	75.5745	262.961	75.7539	262.941	76.091
33.6533	262.368	99.9991	262.375	99.9999	262.38	100	262.371	85.4425	262.302	87.5547	262.246	89.2203	262.981	75.5788	262.959	75.7589	262.94	76.097
33.6762	262.368	99.9991	262.375	99.9999	262.38	100	262.372	85.4333	262.302	87.5486	262.247	89.2144	262.979	75.5975	262.96	75.7206	262.94	76.106
33.699	262.368	99.9991	262.375	99.9999	262.38	100	262.372	85.4127	262.302	87.546	262.247	89.2103	262.978	75.6077	262.961	75.7147	262.941	76.108
33.7219	262.368	99.9992	262.375	99.9999	262.38	100	262.373	85.4043	262.302	87.5384	262.247	89.1986	262.978	75.6118	262.964	75.7076	262.942	76.109
33.7448	262.368	99.9992	262.375	99.9999	262.38	100	262.373	85.4063	262.301	87.566	262.247	89.2102	262.979	75.5867	262.964	75.7514	262.941	76.104
33.7677	262.368	99.9992	262.375	99.9999	262.38	100	262.372	85.4217	262.301	87.5857	262.246	89.228	262.979	75.5801	262.961	75.8117	262.94	76.1
33.7906	262.368	99.9992	262.375	99.9999	262.38	100	262.371	85.4453	262.3	87.6009	262.246	89.2476	262.979	75.5745	262.959	75.8718	262.939	76.093
33.8135	262.368	99.9992	262.375	99.9999	262.38	100	262.371	85.4601	262.3	87.6145	262.246	89.2359	262.979	75.5853	262.956	75.866	262.937	76.089
33.8364	262.368	99.9992	262.375	99.9999	262.38	100	262.371	85.4642	262.3	87.6127	262.246	89.2334	262.979	75.577	262.955	75.862	262.937	76.088
33.8593	262.368	99.9992	262.375	99.9999	262.38	100	262.371	85.4618	262.299	87.6256	262.247	89.2158	262.979	75.568	262.958	75.8351	262.937	76.085
33.8822	262.368	99.9992	262.375	99.9999	262.38	100	262.371	85.4536	262.299	87.6351	262.247	89.205	262.979	75.5765	262.96	75.8168	262.937	76.081
33.9051	262.368	99.9992	262.375	99.9999	262.38	100	262.372	85.4367	262.299	87.6449	262.246	89.223	262.98	75.5602	262.958	75.8687	262.936	76.076
33.9279	262.368	99.9992	262.375	99.9999	262.38	100	262.372	85.4259	262.299	87.6436	262.246	89.2352	262.98	75.5622	262.955	75.9117	262.935	76.074
33.9508	262.368	99.9992	262.375	99.9999	262.38	100	262.372	85.4228	262.299	87.6396	262.245	89.252	262.98	75.556	262.953	75.9078	262.935	76.07
33.9737	262.368	99.9992	262.375	99.9999	262.38	100	262.372	85.4251	262.3	87.6169	262.245	89.2668	262.98	75.5552	262.954	75.882	262.935	76.07
33.9966	262.368	99.9992	262.375	99.9999	262.38	100	262.372	85.434	262.3	87.6085	262.245	89.2535	262.98	75.559	262.957	75.835	262.936	76.071
34.0195	262.368	99.9992	262.375	99.9999	262.38	100	262.371	85.4458	262.3	87.6032	262.245	89.2566	262.981	75.5581	262.959	75.8075	262.937	76.076
34.0424	262.368	99.9992	262.375	99.9999	262.38	100	262.37	85.4769	262.3	87.6096	262.245	89.2653	262.981	75.5669	262.959	75.8184	262.937	76.084
34.0653	262.368	99.9992	262.375	99.9999	262.38	100	262.37	85.4899	262.299	87.6294	262.245	89.2744	262.981	75.5794	262.957	75.8437	262.938	76.096
34.0881	262.368	99.9992	262.375	99.9999	262.38	100	262.37	85.4932	262.299	87.6216	262.245	89.2714	262.98	75.5977	262.957	75.8409	262.938	76.11
34.111	262.368	99.9992	262.375	99.9999	262.38	100	262.37	85.4804	262.299	87.6203	262.245	89.2768	262.978	75.6196	262.96	75.832	262.938	76.119
34.1339	262.368	99.9992	262.375	99.9999	262.38	100	262.37	85.481	262.3	87.615	262.245	89.2756	262.976	75.6279	262.959	75.8365	262.938	76.122
34.1568	262.368	99.9992	262.375	99.9999	262.38	100	262.37	85.4781	262.299	87.6279	262.245	89.2668	262.976	75.6102	262.959	75.8351	262.938	76.117
34.1797	262.368	99.9992	262.375	99.9999	262.38	100	262.37	85.4736	262.299	87.6269	262.245	89.2824	262.978	75.5939	262.959	75.8428	262.938	76.109
34.2026	262.368	99.9992	262.375	99.9999	262.38	100	262.371	85.4665	262.299	87.6294	262.244	89.2972	262.979	75.5743	262.958	75.8135	262.938	76.102
34.2255	262.368	99.9992	262.375	99.9999	262.38	100	262.37	85.4769	262.299	87.6336	262.244	89.304	262.98	75.578	262.958	75.8241	262.938	76.102
34.2484	262.368	99.9992	262.375	99.9999	262.38	100	262.37	85.4775	262.299	87.6341	262.243	89.3191	262.979	75.5964	262.959	75.797	262.939	76.106
34.2713	262.368	99.9992	262.375	99.9999	262.38	100	262.37	85.4877	262.3	87.6098	262.243	89.3177	262.978	75.6085	262.96	75.7855	262.939	76.111
34.2942	262.368	99.9992	262.375	99.9999	262.38	100	262.37	85.4984	262.3	87.6018	262.244	89.3149	262.978	75.6123	262.96	75.8026	262.939	76.116
34.317	262.368	99.9992	262.375	99.9999	262.38	100	262.369	85.5078	262.3	87.6065	262.244	89.3041	262.978	75.5995	262.96	75.8154	262.939	76.114
34.3399	262.368	99.9992	262.375	99.9999	262.38	100	262.369	85.5214	262.299	87.626	262.244	89.2913	262.978	75.6048	262.96	75.8131	262.94	76.11
34.3628	262.368	99.9992	262.375	99.9999	262.38	100	262.369	85.5136	262.298	87.6619	262.244	89.2976	262.979	75.5836	262.96	75.7783	262.94	76.108
34.3857	262.368	99.9992	262.375	99.9999	262.38	100	262.369	85.5064	262.298	87.6763	262.244	89.3103	262.979	75.5885	262.961	75.8045	262.94	76.112
34.4086	262.368	99.9993	262.375	99.9999	262.38	100	262.369	85.5081	262.298	87.6808	262.244	89.3006	262.979	75.6039	262.961	75.8145	262.94	76.116
34.4315	262.368	99.9993	262.375	99.9999	262.38	100	262.369	85.5182	262.298	87.6672	262.244	89.3056	262.979	75.6198	262.96	75.8299	262.939	76.126
34.4544	262.368	99.9993	262.375	100	262.38	100	262.369	85.5264	262.298	87.6578	262.243	89.3153	262.979	75.6254	262.959	75.8352	262.939	76.14
34.4772	262.368	99.9993	262.375	100	262.38	100	262.369	85.5277	262.298	87.6539	262.244	89.3131	262.978	75.632	262.958	75.8289	262.939	76.15
34.5001	262.368	99.9993	262.375	100	262.38	100	262.369	85.5289	262.299	87.6416	262.242	89.3628	262.976	75.6583	262.958	75.8039	262.939	76.153
34.523	262.368	99.9993	262.375	100	262.38	100	262.368	85.5391	262.298	87.6593	262.241	89.3852	262.976	75.6541	262.96	75.788	262.939	76.15
34.5459	262.368	99.9993	262.375	100	262.38	100	262.368	85.546	262.298	87.6614	262.241	89.3925	262.977	75.6333	262.962	75.77	262.94	76.148
34.5688	262.368	99.9993	262.375	100	262.38	100	262.368	85.5577	262.298	87.6609	262.241	89.3851	262.978	75.6142	262.961	75.7997	262.94	76.143
34.5917	262.368	99.9993	262.375	100	262.38	100	262.368	85.5609	262.299	87.6391	262.242	89.3656	262.978	75.6196	262.96	75.7898	262.94	76.14
34.6146	262.368	99.9993	262.375	100	262.38	100	262.368	85.5577	262.299	87.6435	262.242	89.3582	262.978	75.6331	262.959	75.7952	262.94	76.143
34.6375	262.368	99.9993	262.375	100	262.38	100	262.368	85.5466	262.299	87.6456	262.242	89.3519	262.978	75.6397	262.96	75.7785	262.94	76.15
34.6604	262.368	99.9993	262.375	100	262.38	100	262.368	85.5482	262.298	87.6789	262.242	89.3789	262.977	75.6477	262.962	75.7588	262.94	76.156
34.6833	262.368	99.9993	262.375	100	262.38	100	262.368	85.5544	262.297	87.7092	262.242	89.3784	262.977	75.6498	262.963	75.7639	262.94	76.158
34.7061	262.368	99.9993	262.375	100	262.38	100	262.368	85.5641	262.295	87.7473	262.241	89.3925	262.976	75.6517	262.961	75.7809	262.94	76.156
34.729	262.368	99.9993	262.375	100	262.38	100	262.368	85.558	262.295	87.7667	262.241	89.4089	262.976	75.6436	262.959	75.8045	262.94	76.151
34.7519	262.368	99.9993	262.375	100	262.38	100	262.368	85.5589	262.295	87.7597	262.241	89.4037	262.978	75.6276	262.96	75.7877	262.94	76.148
34.7748	262.368	99.9993	262.375	100	262.38	100	262.368	85.5632	262.296	87.7329	262.241	89.4033	262.979	75.6211	262.961	75.766	262.94	76.147
34.7977	262.368	99.9993	262.375	100	262.38	100	262.367	85.5725	262.297	87.6917	262.241	89.4026	262.979	75.6352	262.962	75.7668	262.94	76.148
34.8206	262.368	99.9993	262.375	100	262.38	100	262.367	85.5891	262.297	87.6868	262.24	89.4143	262.978	75.6463	262.961	75.7885	262.94	76.153
34.8435	262.368	99.9993	262.375	100	262.38	100	262.366	85.598	262.297	87.7062	262.24	89.4137	262.978	75.6521	262.96	75.8179	262.939	76.158
34.8663	262.368	99.9993	262.375	100	262.38	100	262.366	85.6002	262.296	87.7269	262.241	89.4048	262.978	75.65	262.958	75.8217	262.939	76.16
34.8892	262.368	99.9993	262.375	100	262.38	100	262.367	85.5929	262.295	87.758	262.241	89.393	262.977	75.649	262.958	75.8427	262.938	76.157
34.9121	262.368	99.9993	262.375	100	262.38	100	262.367	85.5801	262.295	87.7588	262.241	89.3877	262.977	75.6411	262.959	75.8327	262.938	76.151
34.935	262.368	99.9993	262.375	100	262.38	100	262.367	85.5837	262.295	87.7556	262.241	89.401	262.977	75.6317	262.96	75.8226	262.938	76.144
34.9579	262.368	99.9993	262.375	100	262.38	100	262.367	85.591	262.296	87.7351	262.24	89.4306	262.978	75.6224	262.959	75.8215	262.938	76.136
34.9808	262.368	99.9993	262.375	100	262.38	100	262.366	85.6141	262.296	87.719	262.239	89.4712	262.978	75.6157	262.958	75.8339	262.938	76.131
35.0037	262.368	99.9993	262.375	100	262.38	100	262.366	85.6166	262.296	87.7191	262.238	89.5007	262.979	75.6115	262.957	75.8468	262.938	76.128
35.0266	262.368	99.9993	262.375	100	262.38	100	262.366	85.6104	262.296	87.7289	262.237	89.5349	262.98	75.6137	262.959	75.8078	262.939	76.13
35.0495	262.368	99.9993	262.375	100	262.38	100	262.366	85.5982	262.296	87.7397	262.237	89.5281	262.979	75.6173	262.961	75.7958	262.939	76.135
35.0724	262.368	99.9993	262.375	100	262.38	100	262.366	85.5978	262.295	87.7497	262.237	89.5184	262.979	75.6348	262.961	75.8161	262.938	76.14
35.0952	262.368	99.9993	262.375	100	262.38	100	262.366	85.6102	262.296	87.7402	262.237	89.5104	262.979	75.6383	262.958	75.8512	262.938	76.144
35.1181	262.368	99.9993	262.375	100	262.38	100	262.366	85.6179	262.296	87.7269	262.238	89.4985	262.979	75.634	262.956	75.8795	262.938	76.15
35.141	262.368	99.9993	262.375	100	262.38	100	262.366	85.62	262.296	87.7274	262.237	89.5134	262.979	75.6358	262.957	75.8498	262.938	76.155
35.1639	262.368	99.9994	262.375	100	262.38	100	262.366	85.6235	262.296	87.7277	262.237	89.5283	262.978	75.6454	262.96	75.8229	262.938	76.16
35.1868	262.368	99.9994	262.375	100	262.38	100	262.366	85.6219	262.296	87.7417	262.236	89.5418	262.976	75.6642	262.961	75.8244	262.938	76.162
35.2097	262.368	99.9994	262.375	100	262.38	100	262.366	85.6183	262.295	87.7574	262.237	89.5296	262.976	75.6616	262.959	75.8269	262.938	76.162
35.2326	262.368	99.9994	262.375	100	262.38	100	262.366	85.6177	262.295	87.7667	262.237	89.5237	262.976	75.6455	262.957	75.8347	262.938	76.158
35.2555	262.368	99.9994	262.375	100	262.38	100	262.366	85.6229	262.294	87.7817	262.237	89.5136	262.978	75.6331	262.958	75.8017	262.939	76.153
35.2783	262.368	99.9994	262.375	100	262.38	100	262.365	85.632	262.294	87.7896	262.237	89.5285	262.979	75.6285	262.96	75.7728	262.94	76.15
35.3012	262.368	99.9994	262.375	100	262.38	100	262.365	85.6393	262.294	87.7914	262.236	89.5516	262.978	75.6357	262.962	75.7652	262.94	76.154
35.3241	262.368	99.9994	262.375	100	262.38	100	262.365	85.6506	262.294	87.7948	262.234	89.6039	262.979	75.6482	262.963	75.7897	262.94	76.16
35.347	262.368	99.9994	262.375	100	262.38	100	262.364	85.6599	262.294	87.8058	262.234	89.6216	262.978	75.6644	262.96	75.8243	262.94	76.168
35.3699	262.368	99.9994	262.375	100	262.38	100	262.365	85.6543	262.293	87.8137	262.234	89.6192	262.978	75.6658	262.958	75.8674	262.939	76.178
35.3928	262.368	99.9994	262.375	100	262.38	100	262.364	85.6658	262.293	87.8127	262.234	89.6052	262.978	75.6649	262.958	75.844	262.938	76.185
35.4157	262.368	99.9994	262.375	100	262.38	100	262.364	85.6757	262.293	87.8097	262.235	89.5802	262.977	75.6867	262.959	75.8245	262.939	76.187
35.4386	262.368	99.9994	262.375	100	262.38	100	262.364	85.6639	262.293	87.8227	262.236	89.5702	262.976	75.6823	262.96	75.8036	262.939	76.187
35.4614	262.368	99.9994	262.375	100	262.38	100	262.365	85.6523	262.293	87.8234	262.236	89.5618	262.976	75.6774	262.96	75.795	262.939	76.185
35.4843	262.368	99.9994	262.375	100	262.38	100	262.365	85.6485	262.292	87.8408	262.235	89.5901	262.976	75.6626	262.96	75.7906	262.939	76.177
35.5072	262.368	99.9994	262.375	100	262.38	100	262.365	85.6525	262.292	87.8682	262.234	89.6171	262.976	75.658	262.959	75.8095	262.94	76.167
35.5301	262.368	99.9994	262.375	100	262.38	100	262.364	85.669	262.291	87.8802	262.234	89.6263	262.977	75.6454	262.96	75.7932	262.94	76.156
35.553	262.368	99.9994	262.375	100	262.38	100	262.364	85.6681	262.292	87.8673	262.234	89.6135	262.977	75.6324	262.961	75.7884	262.94	76.147
35.5759	262.368	99.9994	262.375	100	262.38	100	262.364	85.679	262.292	87.8542	262.234	89.6072	262.978	75.6235	262.961	75.8169	262.939	76.138
35.5988	262.368	99.9994	262.375	100	262.38	100	262.363	85.6972	262.292	87.8432	262.235	89.5839	262.978	75.6159	262.959	75.8507	262.939	76.13
35.6217	262.368	99.9994	262.375	100	262.38	100	262.363	85.7143	262.292	87.8471	262.235	89.5874	262.979	75.6117	262.958	75.8737	262.938	76.125
35.6446	262.368	99.9994	262.375	100	262.38	100	262.363	85.7207	262.292	87.8615	262.234	89.6083	262.98	75.6067	262.958	75.8876	262.937	76.123
35.6674	262.368	99.9994	262.375	100	262.38	100	262.363	85.7117	262.291	87.8776	262.234	89.6301	262.98	75.6089	262.958	75.8724	262.937	76.126
35.6903	262.368	99.9994	262.375	100	262.38	100	262.363	85.7104	262.291	87.8863	262.234	89.6331	262.98	75.6099	262.958	75.8553	262.937	76.131
35.7132	262.368	99.9994	262.375	100	262.38	100	262.363	85.7043	262.291	87.8838	262.234	89.6225	262.979	75.6328	262.957	75.8562	262.937	76.135
35.7361	262.368	99.9994	262.375	100	262.38	100	262.363	85.6995	262.292	87.8679	262.234	89.6078	262.978	75.6378	262.957	75.8594	262.937	76.137
35.759	262.368	99.9994	262.375	100	262.38	100	262.364	85.6842	262.291	87.8758	262.234	89.6028	262.978	75.6255	262.957	75.8294	262.938	76.138
35.7819	262.368	99.9994	262.375	100	262.38	100	262.364	85.6894	262.291	87.8801	262.234	89.628	262.978	75.6205	262.959	75.7929	262.939	76.134
35.8048	262.368	99.9994	262.375	100	262.38	100	262.364	85.6778	262.292	87.8692	262.233	89.6385	262.979	75.6149	262.962	75.7759	262.94	76.129
35.8277	262.368	99.9994	262.375	100	262.38	100	262.364	85.6789	262.291	87.8729	262.232	89.6696	262.979	75.6104	262.963	75.8171	262.939	76.128
35.8505	262.368	99.9994	262.375	100	262.38	100	262.364	85.6804	262.292	87.8631	262.232	89.6767	262.978	75.6145	262.961	75.8894	262.938	76.127
35.8734	262.368	99.9994	262.375	100	262.38	100	262.364	85.6859	262.291	87.8724	262.232	89.6902	262.978	75.6185	262.955	75.951	262.937	76.126
35.8963	262.368	99.9994	262.375	100	262.38	100	262.363	85.7025	262.291	87.8838	262.232	89.6931	262.978	75.6194	262.953	75.9486	262.935	76.126
35.9192	262.368	99.9994	262.375	100	262.38	100	262.363	85.7156	262.29	87.9114	262.231	89.699	262.979	75.6077	262.954	75.9142	262.935	76.127
35.9421	262.368	99.9994	262.375	100	262.38	100	262.362	85.7262	262.29	87.9276	262.232	89.693	262.979	75.6087	262.957	75.8673	262.936	76.13
35.965	262.368	99.9994	262.375	100	262.38	100	262.362	85.7344	262.289	87.9434	262.232	89.6679	262.979	75.6194	262.96	75.8403	262.937	76.135
35.9879	262.368	99.9994	262.375	100	262.38	100	262.362	85.741	262.29	87.93	262.233	89.6578	262.979	75.6339	262.96	75.8613	262.938	76.145
36.0108	262.368	99.9994	262.375	100	262.38	100	262.362	85.7413	262.29	87.9248	262.233	89.6575	262.978	75.6477	262.958	75.8965	262.937	76.155
36.0337	262.368	99.9994	262.375	100	262.38	100	262.362	85.7246	262.29	87.9103	262.233	89.6476	262.978	75.6547	262.956	75.9016	262.937	76.164
36.0565	262.368	99.9995	262.375	100	262.38	100	262.363	85.7156	262.29	87.9146	262.232	89.6674	262.976	75.6576	262.955	75.9061	262.937	76.163
36.0794	262.368	99.9995	262.375	100	262.38	100	262.363	85.7039	262.29	87.9254	262.232	89.6776	262.976	75.666	262.957	75.8834	262.937	76.157
36.1023	262.368	99.9995	262.375	100	262.38	100	262.363	85.7043	262.29	87.9277	262.232	89.6763	262.978	75.6313	262.959	75.8249	262.938	76.153
36.1252	262.368	99.9995	262.375	100	262.38	100	262.362	85.7216	262.29	87.9319	262.232	89.6826	262.978	75.6165	262.96	75.8315	262.938	76.152
36.1481	262.368	99.9995	262.375	100	262.38	100	262.362	85.7379	262.289	87.9398	262.232	89.6869	262.978	75.6324	262.958	75.8672	262.938	76.15
36.171	262.368	99.9995	262.375	100	262.38	100	262.361	85.756	262.289	87.9379	262.231	89.7177	262.977	75.6562	262.957	75.8979	262.938	76.152
36.1939	262.368	99.9995	262.375	100	262.38	100	262.361	85.765	262.289	87.9398	262.231	89.7219	262.977	75.6559	262.957	75.8733	262.938	76.153
36.2167	262.368	99.9995	262.375	100	262.38	100	262.361	85.7831	262.29	87.929	262.231	89.7232	262.977	75.6387	262.959	75.8368	262.938	76.149
36.2396	262.368	99.9995	262.375	100	262.38	100	262.36	85.797	262.29	87.9335	262.231	89.7187	262.977	75.624	262.96	75.8154	262.938	76.138
36.2625	262.368	99.9995	262.375	100	262.38	100	262.359	85.8189	262.289	87.9471	262.232	89.6958	262.979	75.6102	262.96	75.8119	262.939	76.131
36.2854	262.368	99.9995	262.375	100	262.38	100	262.36	85.8076	262.288	87.979	262.232	89.6877	262.979	75.5995	262.96	75.8101	262.939	76.133
36.3083	262.368	99.9995	262.375	100	262.38	100	262.36	85.796	262.288	87.9967	262.232	89.6895	262.979	75.6222	262.959	75.7987	262.94	76.138
36.3312	262.368	99.9995	262.375	100	262.38	100	262.36	85.7964	262.288	87.9898	262.231	89.7271	262.979	75.6476	262.96	75.7884	262.94	76.149
36.3541	262.368	99.9995	262.375	100	262.38	100	262.36	85.7913	262.288	87.9778	262.23	89.743	262.978	75.653	262.962	75.784	262.941	76.165
36.377	262.368	99.9995	262.375	100	262.38	100	262.36	85.7877	262.289	87.9572	262.229	89.7639	262.976	75.6641	262.963	75.795	262.941	76.169
36.3999	262.368	99.9995	262.375	100	262.38	100	262.36	85.7983	262.288	87.9772	262.229	89.7734	262.976	75.6762	262.962	75.8426	262.94	76.167
36.4228	262.368	99.9995	262.375	100	262.38	100	262.36	85.7905	262.288	87.9923	262.23	89.7601	262.977	75.6462	262.959	75.8651	262.939	76.165
36.4456	262.368	99.9995	262.375	100	262.38	100	262.36	85.8057	262.287	88.0152	262.23	89.7572	262.978	75.6368	262.956	75.8821	262.938	76.164
36.4685	262.368	99.9995	262.375	100	262.38	100	262.36	85.8145	262.287	88.024	262.23	89.7422	262.979	75.6433	262.956	75.8593	262.938	76.164
36.4914	262.368	99.9995	262.375	100	262.38	100	262.359	85.8251	262.287	88.0243	262.23	89.7373	262.978	75.6565	262.959	75.8107	262.938	76.172
36.5143	262.368	99.9995	262.375	100	262.38	100	262.359	85.8347	262.287	88.0193	262.23	89.7415	262.977	75.677	262.962	75.7793	262.939	76.178
36.5372	262.368	99.9995	262.375	100	262.38	100	262.359	85.8236	262.287	88.0218	262.23	89.7521	262.975	75.6893	262.961	75.8	262.939	76.179
36.5601	262.368	99.9995	262.375	100	262.38	100	262.359	85.8181	262.287	88.0171	262.23	89.7575	262.976	75.6649	262.959	75.8489	262.939	76.174
36.583	262.368	99.9995	262.375	100	262.38	100	262.36	85.8146	262.287	88.0291	262.23	89.7539	262.978	75.6482	262.957	75.8646	262.938	76.167
36.6058	262.368	99.9995	262.375	100	262.38	100	262.359	85.8169	262.287	88.0265	262.23	89.7508	262.978	75.6305	262.957	75.8369	262.938	76.16
36.6287	262.368	99.9995	262.375	100	262.38	100	262.359	85.8182	262.287	88.0043	262.229	89.7754	262.977	75.6432	262.959	75.8017	262.939	76.155
36.6516	262.368	99.9995	262.375	100	262.38	100	262.359	85.8235	262.288	87.9851	262.228	89.7988	262.977	75.6524	262.962	75.8036	262.939	76.152
36.6745	262.368	99.9995	262.375	100	262.38	100	262.359	85.8403	262.288	87.9804	262.228	89.8211	262.978	75.6394	262.961	75.8273	262.939	76.154
36.6974	262.368	99.9995	262.375	100	262.38	100	262.359	85.837	262.288	87.9716	262.228	89.8139	262.977	75.6365	262.958	75.8391	262.939	76.153
36.7203	262.368	99.9995	262.375	100	262.38	100	262.359	85.8377	262.288	87.9782	262.228	89.8076	262.977	75.6382	262.958	75.8387	262.939	76.149
36.7432	262.368	99.9995	262.375	100	262.38	100	262.359	85.8459	262.288	87.9894	262.228	89.8014	262.978	75.6396	262.96	75.8265	262.939	76.151
36.7661	262.368	99.9995	262.375	100	262.38	100	262.359	85.8432	262.288	87.9877	262.229	89.7926	262.978	75.6342	262.961	75.8084	262.939	76.153
36.789	262.368	99.9995	262.375	100	262.38	100	262.358	85.8467	262.288	87.9919	262.229	89.7629	262.978	75.6474	262.961	75.8272	262.939	76.157
36.8118	262.368	99.9995	262.375	100	262.38	100	262.359	85.8394	262.288	87.9875	262.229	89.7722	262.978	75.6477	262.959	75.8306	262.938	76.159
36.8347	262.368	99.9995	262.375	100	262.38	100	262.359	85.8404	262.288	87.9742	262.229	89.7659	262.978	75.6545	262.957	75.8201	262.938	76.167
36.8576	262.368	99.9995	262.375	100	262.38	100	262.359	85.8208	262.289	87.9631	262.229	89.7632	262.977	75.6514	262.957	75.7997	262.938	76.169
36.8805	262.368	99.9995	262.375	100	262.38	100	262.359	85.8291	262.289	87.9657	262.229	89.7826	262.975	75.6724	262.96	75.7712	262.939	76.166
36.9034	262.368	99.9995	262.375	100	262.38	100	262.359	85.8321	262.288	87.9682	262.229	89.7933	262.976	75.6581	262.963	75.7587	262.94	76.16
36.9263	262.368	99.9995	262.375	100	262.38	100	262.359	85.8331	262.288	87.9878	262.227	89.8297	262.977	75.6316	262.963	75.7819	262.94	76.155
36.9492	262.368	99.9995	262.375	100	262.38	100	262.359	85.8411	262.287	88.0051	262.227	89.8288	262.978	75.6268	262.961	75.7962	262.94	76.146
36.9721	262.368	99.9995	262.375	100	262.38	100	262.359	85.8425	262.287	88.0166	262.228	89.8143	262.978	75.6264	262.958	75.813	262.94	76.142
36.995	262.368	99.9995	262.375	100	262.38	100	262.358	85.8514	262.286	88.0384	262.228	89.8085	262.979	75.6258	262.958	75.8315	262.939	76.145
37.0178	262.368	99.9995	262.375	100	262.38	100	262.358	85.8637	262.286	88.0386	262.229	89.792	262.978	75.6395	262.961	75.7938	262.939	76.153
37.0407	262.368	99.9995	262.375	100	262.38	100	262.358	85.8597	262.287	88.0238	262.229	89.7717	262.979	75.6482	262.961	75.7758	262.939	76.165
37.0636	262.368	99.9995	262.375	100	262.38	100	262.358	85.8758	262.286	88.0374	262.229	89.7646	262.976	75.6666	262.96	75.8151	262.939	76.17
37.0865	262.368	99.9996	262.375	100	262.38	100	262.357	85.882	262.286	88.0482	262.228	89.7951	262.975	75.6832	262.958	75.8266	262.938	76.165
37.1094	262.368	99.9996	262.375	100	262.38	100	262.357	85.8967	262.285	88.0712	262.228	89.8115	262.975	75.6534	262.957	75.8449	262.937	76.156
37.1323	262.368	99.9996	262.375	100	262.38	100	262.356	85.9131	262.285	88.0828	262.228	89.8183	262.976	75.6162	262.957	75.8362	262.937	76.14
37.1552	262.368	99.9996	262.375	100	262.38	100	262.357	85.9081	262.285	88.0848	262.228	89.7947	262.978	75.6009	262.959	75.8179	262.938	76.122
37.1781	262.368	99.9996	262.375	100	262.38	100	262.357	85.9009	262.285	88.08	262.229	89.7791	262.979	75.5842	262.96	75.8134	262.938	76.115
37.2009	262.368	99.9996	262.375	100	262.38	100	262.357	85.8996	262.285	88.0647	262.229	89.7644	262.98	75.5981	262.96	75.8324	262.938	76.122
37.2238	262.368	99.9996	262.375	100	262.38	100	262.357	85.898	262.286	88.0502	262.229	89.7745	262.98	75.6173	262.959	75.8467	262.938	76.137
37.2467	262.368	99.9996	262.375	100	262.38	100	262.357	85.9084	262.285	88.0649	262.229	89.7895	262.978	75.6504	262.957	75.8437	262.938	76.154
37.2696	262.368	99.9996	262.375	100	262.38	100	262.356	85.9169	262.285	88.0691	262.228	89.8133	262.976	75.6763	262.958	75.8396	262.938	76.163
37.2925	262.368	99.9996	262.375	100	262.38	100	262.356	85.93	262.285	88.0852	262.228	89.8229	262.975	75.6687	262.96	75.7755	262.939	76.16
37.3154	262.368	99.9996	262.375	100	262.38	100	262.355	85.941	262.285	88.0883	262.228	89.8259	262.976	75.6404	262.961	75.7699	262.94	76.152
37.3383	262.368	99.9996	262.375	100	262.38	100	262.355	85.9406	262.285	88.0898	262.227	89.8452	262.978	75.6068	262.962	75.7859	262.94	76.136
37.3612	262.368	99.9996	262.375	100	262.38	100	262.355	85.9479	262.284	88.1011	262.227	89.852	262.979	75.6064	262.961	75.8229	262.94	76.12
37.3841	262.368	99.9996	262.375	100	262.38	100	262.355	85.9416	262.284	88.1016	262.227	89.853	262.979	75.5961	262.96	75.8326	262.939	76.113
37.4069	262.368	99.9996	262.375	100	262.38	100	262.355	85.9467	262.284	88.1051	262.227	89.8465	262.978	75.5931	262.959	75.8426	262.939	76.11
37.4298	262.368	99.9996	262.375	100	262.38	100	262.355	85.9427	262.284	88.1117	262.227	89.8423	262.979	75.6053	262.958	75.8511	262.938	76.104
37.4527	262.368	99.9996	262.375	100	262.38	100	262.355	85.9438	262.284	88.0983	262.227	89.8503	262.979	75.5876	262.958	75.8354	262.938	76.102
37.4756	262.368	99.9996	262.375	100	262.38	100	262.355	85.9453	262.284	88.0991	262.226	89.8808	262.98	75.5798	262.959	75.8144	262.938	76.102
37.4985	262.368	99.9996	262.375	100	262.38	100	262.355	85.9659	262.284	88.1028	262.225	89.9055	262.98	75.585	262.959	75.7901	262.939	76.102
37.5214	262.368	99.9996	262.375	100	262.38	100	262.354	85.9833	262.283	88.1302	262.225	89.9086	262.98	75.5943	262.96	75.7822	262.94	76.105
37.5443	262.368	99.9996	262.375	100	262.38	100	262.354	85.9988	262.283	88.1332	262.224	89.9239	262.979	75.6024	262.962	75.7849	262.94	76.108
37.5672	262.368	99.9996	262.375	100	262.38	100	262.353	86.0037	262.283	88.1462	262.225	89.8923	262.979	75.6043	262.963	75.7778	262.94	76.108
37.59	262.368	99.9996	262.375	100	262.38	100	262.354	85.9976	262.283	88.1306	262.226	89.8806	262.98	75.5924	262.961	75.8098	262.939	76.109
37.6129	262.368	99.9996	262.375	100	262.38	100	262.354	85.9929	262.284	88.1149	262.225	89.8935	262.979	75.5888	262.958	75.8309	262.939	76.104
37.6358	262.368	99.9996	262.375	100	262.38	100	262.354	85.9925	262.284	88.103	262.225	89.8978	262.978	75.5958	262.957	75.8327	262.939	76.095
37.6587	262.368	99.9996	262.375	100	262.38	100	262.354	86.0019	262.284	88.1064	262.225	89.9085	262.979	75.5775	262.959	75.7975	262.939	76.088
37.6816	262.368	99.9996	262.375	100	262.38	100	262.353	86.0207	262.283	88.147	262.224	89.9246	262.98	75.5621	262.961	75.769	262.94	76.083
37.7045	262.368	99.9996	262.375	100	262.38	100	262.353	86.0298	262.282	88.1746	262.224	89.9422	262.981	75.5581	262.961	75.7856	262.94	76.082
37.7274	262.368	99.9996	262.375	100	262.38	100	262.353	86.0305	262.281	88.1951	262.223	89.964	262.981	75.5642	262.961	75.8125	262.94	76.088
37.7503	262.368	99.9996	262.375	100	262.38	100	262.353	86.0291	262.282	88.1809	262.222	89.9894	262.98	75.5895	262.96	75.8489	262.94	76.097
37.7732	262.368	99.9996	262.375	100	262.38	100	262.353	86.0226	262.282	88.1648	262.222	89.9973	262.979	75.6079	262.959	75.8674	262.939	76.107
37.796	262.368	99.9996	262.375	100	262.38	100	262.353	86.0299	262.283	88.1414	262.223	89.9698	262.979	75.6064	262.959	75.855	262.938	76.116
37.8189	262.368	99.9996	262.375	100	262.38	100	262.352	86.0402	262.284	88.118	262.223	89.9549	262.978	75.6068	262.958	75.8604	262.938	76.12
37.8418	262.368	99.9996	262.375	100	262.38	100	262.352	86.0437	262.284	88.1142	262.224	89.9476	262.979	75.6101	262.958	75.8417	262.938	76.123
37.8647	262.368	99.9996	262.375	100	262.38	100	262.352	86.0444	262.284	88.1254	262.224	89.9508	262.98	75.6088	262.958	75.8235	262.938	76.127
37.8876	262.368	99.9996	262.375	100	262.38	100	262.353	86.029	262.283	88.1434	262.223	89.9728	262.979	75.6228	262.959	75.8065	262.939	76.136
37.9105	262.368	99.9996	262.375	100	262.38	100	262.353	86.0235	262.282	88.1647	262.222	90.0073	262.977	75.6279	262.96	75.782	262.939	76.144
37.9334	262.368	99.9996	262.375	100	262.38	100	262.353	86.0264	262.282	88.17	262.222	90.0057	262.976	75.651	262.962	75.7947	262.94	76.149
37.9563	262.368	99.9996	262.375	100	262.38	100	262.352	86.0398	262.282	88.1753	262.222	90.0083	262.976	75.6489	262.962	75.8089	262.94	76.15
37.9791	262.368	99.9996	262.375	100	262.38	100	262.352	86.0563	262.282	88.1685	262.222	89.9941	262.978	75.6348	262.96	75.828	262.94	76.155
38.002	262.368	99.9996	262.375	100	262.38	100	262.352	86.0647	262.282	88.1696	262.222	90.0065	262.979	75.6268	262.959	75.8213	262.939	76.16
38.0249	262.368	99.9996	262.375	100	262.38	100	262.351	86.0777	262.282	88.1769	262.221	90.0288	262.977	75.6529	262.959	75.8233	262.939	76.164
38.0478	262.368	99.9996	262.375	100	262.38	100	262.351	86.0776	262.282	88.1743	262.221	90.0409	262.975	75.6757	262.961	75.7924	262.94	76.165
38.0707	262.368	99.9996	262.375	100	262.38	100	262.351	86.0784	262.282	88.1696	262.22	90.053	262.976	75.6679	262.961	75.7636	262.94	76.168
38.0936	262.368	99.9996	262.375	100	262.38	100	262.351	86.087	262.282	88.1685	262.22	90.0571	262.977	75.6438	262.961	75.7774	262.94	76.166
38.1165	262.368	99.9996	262.375	100	262.38	100	262.351	86.09	262.282	88.1607	262.22	90.0653	262.978	75.6399	262.961	75.7794	262.94	76.162
38.1394	262.368	99.9996	262.375	100	262.38	100	262.351	86.0955	262.283	88.155	262.22	90.0528	262.978	75.642	262.961	75.7826	262.94	76.163
38.1623	262.368	99.9996	262.375	100	262.38	100	262.351	86.0965	262.282	88.1592	262.22	90.0618	262.977	75.6584	262.961	75.7607	262.941	76.166
38.1851	262.368	99.9996	262.375	100	262.38	100	262.35	86.1041	262.282	88.1643	262.22	90.0616	262.977	75.6702	262.961	75.7652	262.941	76.171
38.208	262.368	99.9996	262.375	100	262.38	100	262.35	86.1124	262.282	88.1807	262.22	90.0696	262.978	75.66	262.962	75.7544	262.941	76.175
38.2309	262.368	99.9996	262.375	100	262.38	100	262.35	86.1178	262.281	88.1905	262.22	90.075	262.978	75.6629	262.962	75.7502	262.941	76.175
38.2538	262.368	99.9996	262.375	100	262.38	100	262.35	86.1231	262.281	88.2027	262.22	90.0702	262.977	75.6655	262.96	75.7719	262.941	76.175
38.2767	262.368	99.9996	262.375	100	262.38	100	262.35	86.1146	262.281	88.2049	262.219	90.0861	262.976	75.6583	262.961	75.7494	262.941	76.172
38.2996	262.368	99.9996	262.375	100	262.38	100	262.35	86.1132	262.281	88.2006	262.219	90.0881	262.975	75.6711	262.962	75.7284	262.941	76.163
38.3225	262.368	99.9996	262.375	100	262.38	100	262.35	86.1162	262.281	88.2024	262.219	90.092	262.976	75.6445	262.963	75.7117	262.942	76.15
38.3454	262.368	99.9996	262.375	100	262.38	100	262.349	86.1313	262.281	88.1959	262.219	90.1034	262.977	75.6177	262.963	75.7191	262.942	76.137
38.3682	262.368	99.9996	262.375	100	262.38	100	262.349	86.138	262.281	88.1966	262.219	90.094	262.978	75.5973	262.964	75.735	262.942	76.125
38.3911	262.368	99.9996	262.375	100	262.38	100	262.349	86.1382	262.281	88.2026	262.219	90.0898	262.979	75.5969	262.961	75.756	262.942	76.121
38.414	262.368	99.9997	262.375	100	262.38	100	262.349	86.1349	262.281	88.2084	262.219	90.0855	262.98	75.6077	262.961	75.7619	262.942	76.125
38.4369	262.368	99.9997	262.375	100	262.38	100	262.349	86.1484	262.28	88.2219	262.219	90.0923	262.979	75.6245	262.963	75.738	262.942	76.134
38.4598	262.368	99.9997	262.375	100	262.38	100	262.349	86.1473	262.28	88.2347	262.219	90.1015	262.979	75.6366	262.964	75.7302	262.942	76.141
38.4827	262.368	99.9997	262.375	100	262.38	100	262.349	86.1465	262.28	88.2278	262.218	90.1157	262.979	75.643	262.963	75.738	262.942	76.145
38.5056	262.368	99.9997	262.375	100	262.38	100	262.349	86.1503	262.28	88.2485	262.218	90.1383	262.978	75.6322	262.962	75.7322	262.942	76.141
38.5285	262.368	99.9997	262.375	100	262.38	100	262.348	86.1612	262.279	88.2567	262.217	90.1487	262.977	75.6275	262.961	75.7462	262.941	76.128
38.5513	262.368	99.9997	262.375	100	262.38	100	262.349	86.1497	262.279	88.2671	262.217	90.1544	262.977	75.6067	262.96	75.7431	262.941	76.11
38.5742	262.368	99.9997	262.375	100	262.38	100	262.349	86.1359	262.279	88.2763	262.217	90.1708	262.979	75.573	262.962	75.7208	262.942	76.093
38.5971	262.368	99.9997	262.375	100	262.38	100	262.349	86.1323	262.279	88.2831	262.216	90.1814	262.98	75.5505	262.964	75.7166	262.942	76.077
38.62	262.368	99.9997	262.375	100	262.38	100	262.349	86.136	262.278	88.2879	262.216	90.1822	262.981	75.5477	262.963	75.74	262.942	76.07
38.6429	262.368	99.9997	262.375	100	262.38	100	262.349	86.1474	262.279	88.2841	262.217	90.1753	262.982	75.5487	262.963	75.751	262.941	76.073
38.6658	262.368	99.9997	262.375	100	262.38	100	262.349	86.1535	262.278	88.2924	262.217	90.1767	262.982	75.5698	262.961	75.7918	262.941	76.082
38.6887	262.368	99.9997	262.375	100	262.38	100	262.349	86.1407	262.278	88.3069	262.217	90.1695	262.981	75.5874	262.96	75.7646	262.941	76.096
38.7116	262.368	99.9997	262.375	100	262.38	100	262.35	86.1272	262.278	88.3099	262.217	90.1758	262.979	75.5972	262.961	75.7584	262.941	76.109
38.7345	262.368	99.9997	262.375	100	262.38	100	262.35	86.1158	262.278	88.3047	262.216	90.195	262.977	75.6184	262.962	75.7203	262.941	76.115
38.7573	262.368	99.9997	262.375	100	262.38	100	262.35	86.1185	262.278	88.297	262.216	90.2062	262.977	75.6149	262.963	75.7329	262.941	76.117
38.7802	262.368	99.9997	262.375	100	262.38	100	262.349	86.1347	262.278	88.2932	262.215	90.2137	262.979	75.5952	262.962	75.7588	262.94	76.118
38.8031	262.368	99.9997	262.375	100	262.38	100	262.348	86.1609	262.278	88.2877	262.216	90.2004	262.979	75.5998	262.959	75.8107	262.94	76.113
38.826	262.368	99.9997	262.375	100	262.38	100	262.348	86.1791	262.278	88.2957	262.216	90.1955	262.978	75.6032	262.958	75.8051	262.939	76.109
38.8489	262.368	99.9997	262.375	100	262.38	100	262.348	86.1855	262.277	88.3196	262.216	90.181	262.978	75.5907	262.959	75.7753	262.939	76.108
38.8718	262.368	99.9997	262.375	100	262.38	100	262.348	86.1879	262.276	88.3484	262.216	90.183	262.978	75.5948	262.961	75.7509	262.94	76.105
38.8947	262.368	99.9997	262.375	100	262.38	100	262.348	86.1717	262.275	88.38	262.215	90.2133	262.978	75.592	262.963	75.7637	262.94	76.098
38.9176	262.368	99.9997	262.375	100	262.38	100	262.348	86.1671	262.275	88.409	262.215	90.2208	262.979	75.5832	262.962	75.8015	262.94	76.093
38.9404	262.368	99.9997	262.375	100	262.38	100	262.349	86.1484	262.275	88.3888	262.215	90.2422	262.979	75.5702	262.959	75.8354	262.939	76.088
38.9633	262.368	99.9997	262.375	100	262.38	100	262.349	86.1527	262.276	88.3754	262.213	90.2799	262.979	75.5644	262.956	75.8786	262.937	76.084
38.9862	262.368	99.9997	262.375	100	262.38	100	262.349	86.1529	262.276	88.3616	262.213	90.2851	262.979	75.571	262.956	75.8746	262.937	76.08
39.0091	262.368	99.9997	262.375	100	262.38	100	262.348	86.1657	262.276	88.3625	262.214	90.2721	262.98	75.5705	262.957	75.8345	262.937	76.082
39.032	262.368	99.9997	262.375	100	262.38	100	262.348	86.1703	262.276	88.3747	262.214	90.2666	262.981	75.5635	262.959	75.8014	262.938	76.09
39.0549	262.368	99.9997	262.375	100	262.38	100	262.348	86.1741	262.276	88.3746	262.214	90.2494	262.98	75.5804	262.96	75.7886	262.938	76.1
39.0778	262.368	99.9997	262.375	100	262.38	100	262.348	86.1822	262.276	88.3792	262.215	90.2387	262.979	75.603	262.959	75.7963	262.939	76.109
39.1007	262.368	99.9997	262.375	100	262.38	100	262.348	86.1806	262.275	88.3842	262.215	90.2272	262.977	75.6225	262.958	75.8254	262.939	76.118
39.1236	262.368	99.9997	262.375	100	262.38	100	262.347	86.1937	262.275	88.3892	262.215	90.2395	262.977	75.618	262.96	75.8334	262.939	76.124
39.1464	262.368	99.9997	262.375	100	262.38	100	262.348	86.1879	262.275	88.392	262.215	90.2316	262.977	75.6081	262.961	75.8459	262.938	76.122
39.1693	262.368	99.9997	262.375	100	262.38	100	262.348	86.1841	262.275	88.3993	262.214	90.2495	262.978	75.6078	262.958	75.8824	262.937	76.117
39.1922	262.368	99.9997	262.375	100	262.38	100	262.348	86.19	262.275	88.4036	262.214	90.2537	262.979	75.5944	262.955	75.8909	262.936	76.12
39.2151	262.368	99.9997	262.375	100	262.38	100	262.347	86.1989	262.275	88.3995	262.213	90.2769	262.979	75.5959	262.954	75.9104	262.935	76.127
39.238	262.368	99.9997	262.375	100	262.38	100	262.347	86.191	262.275	88.3894	262.213	90.2978	262.978	75.6352	262.956	75.8633	262.936	76.138
39.2609	262.368	99.9997	262.375	100	262.38	100	262.348	86.1866	262.275	88.4032	262.213	90.2959	262.978	75.644	262.958	75.8242	262.936	76.151
39.2838	262.368	99.9997	262.375	100	262.38	100	262.347	86.2021	262.274	88.4133	262.212	90.3075	262.977	75.6587	262.959	75.8267	262.937	76.164
39.3067	262.368	99.9997	262.375	100	262.38	100	262.347	86.2155	262.274	88.4293	262.212	90.318	262.977	75.663	262.958	75.8286	262.938	76.167
39.3295	262.368	99.9997	262.375	100	262.38	100	262.347	86.2151	262.274	88.426	262.212	90.3319	262.976	75.6578	262.958	75.8598	262.938	76.165
39.3524	262.368	99.9997	262.375	100	262.38	100	262.347	86.2058	262.274	88.4293	262.212	90.3118	262.977	75.6504	262.959	75.8594	262.937	76.159
39.3753	262.368	99.9997	262.375	100	262.38	100	262.347	86.2064	262.274	88.4121	262.213	90.3013	262.977	75.6381	262.957	75.8716	262.937	76.153
39.3982	262.368	99.9997	262.375	100	262.38	100	262.346	86.2278	262.275	88.4045	262.213	90.2887	262.978	75.6238	262.957	75.8944	262.937	76.149
39.4211	262.368	99.9997	262.375	100	262.38	100	262.346	86.2284	262.275	88.3995	262.213	90.2863	262.978	75.6375	262.957	75.8619	262.937	76.145
39.444	262.368	99.9997	262.375	100	262.38	100	262.346	86.2352	262.275	88.3885	262.213	90.2979	262.978	75.6361	262.958	75.8584	262.937	76.146
39.4669	262.368	99.9997	262.375	100	262.38	100	262.346	86.2399	262.275	88.3955	262.212	90.3096	262.978	75.6306	262.958	75.8504	262.937	76.146
39.4898	262.368	99.9997	262.375	100	262.38	100	262.345	86.2547	262.275	88.4094	262.212	90.3191	262.979	75.641	262.958	75.8305	262.938	76.145
39.5127	262.368	99.9997	262.375	100	262.38	100	262.346	86.2497	262.274	88.4176	262.212	90.3131	262.979	75.6254	262.959	75.8005	262.939	76.15
39.5355	262.368	99.9997	262.375	100	262.38	100	262.345	86.2627	262.274	88.4274	262.212	90.3179	262.978	75.6322	262.961	75.7966	262.939	76.156
39.5584	262.368	99.9997	262.375	100	262.38	100	262.345	86.2823	262.274	88.4353	262.211	90.3466	262.977	75.6631	262.961	75.8127	262.939	76.158
39.5813	262.368	99.9997	262.375	100	262.38	100	262.344	86.2912	262.273	88.4499	262.21	90.3854	262.976	75.6597	262.96	75.8511	262.939	76.162
39.6042	262.368	99.9997	262.375	100	262.38	100	262.344	86.2886	262.273	88.4613	262.21	90.403	262.977	75.6511	262.959	75.856	262.939	76.162
39.6271	262.368	99.9997	262.375	100	262.38	100	262.345	86.2712	262.273	88.4663	262.209	90.4067	262.977	75.6422	262.959	75.8428	262.939	76.157
39.65	262.368	99.9997	262.375	100	262.38	100	262.345	86.2618	262.273	88.4738	262.211	90.3597	262.977	75.6358	262.959	75.825	262.939	76.151
39.6729	262.368	99.9997	262.375	100	262.38	100	262.345	86.2636	262.272	88.4892	262.211	90.343	262.978	75.6344	262.959	75.8059	262.939	76.147
39.6958	262.368	99.9997	262.375	100	262.38	100	262.345	86.2692	262.272	88.5002	262.212	90.319	262.977	75.6311	262.96	75.7988	262.939	76.145
39.7186	262.368	99.9997	262.375	100	262.38	100	262.345	86.282	262.272	88.5062	262.212	90.329	262.978	75.631	262.961	75.7772	262.94	76.145
39.7415	262.368	99.9997	262.375	100	262.38	100	262.344	86.2899	262.271	88.52	262.212	90.3381	262.978	75.6308	262.961	75.7932	262.94	76.145
39.7644	262.368	99.9997	262.375	100	262.38	100	262.344	86.289	262.271	88.5089	262.211	90.3479	262.978	75.6389	262.962	75.8056	262.94	76.141
39.7873	262.368	99.9997	262.375	100	262.38	100	262.345	86.2826	262.272	88.5019	262.212	90.3354	262.978	75.6326	262.96	75.8226	262.94	76.14
[truncated: 883 more rows]
