# Supplementary material for: The impacts of moisture transport on drifting snow sublimation in the saltation layer
Source: Copernicus journal article supplement (doi:10.5194/acp-16-7523-2016), 2016-06-20
Supplement: Supplementary file 3 [file Data in Figure 3.xlsx]

## Sheet: Sublimation Rate
	u*=0.3 m/s, Without moisture transport	u*=0.4 m/s, Without moisture transport	u*=0.5 m/s, Without moisture transport	u*=0.3 m/s, diffusion	u*=0.4 m/s, diffusion	u*=0.5 m/s, diffusion	u*=0.3 m/s, diffusion and advection	u*=0.4 m/s, diffusion and advection	u*=0.5 m/s, diffusion and advection
Time (s)	Sublimation rate (10-5 kg m-2 s-1)	Sublimation rate (10-5 kg m-2 s-1)	Sublimation rate (10-5 kg m-2 s-1)	Sublimation rate (10-5 kg m-2 s-1)	Sublimation rate (10-5 kg m-2 s-1)	Sublimation rate (10-5 kg m-2 s-1)	Sublimation rate (10-5 kg m-2 s-1)	Sublimation rate (10-5 kg m-2 s-1)	Sublimation rate (10-5 kg m-2 s-1)
0.02	0.000658055	0.00212	0.00511	0.00103	0.00284	0.00568	0.00103	0.00284	0.00474
0.0399994	0.00202	0.00607	0.015	0.00319	0.00874	0.01755	0.00319	0.00874	0.01457
0.0599968	0.00352	0.01136	0.03171	0.00555	0.01553	0.03501	0.00555	0.01553	0.02601
0.0799941	0.00555	0.01671	0.04844	0.00815	0.02241	0.0522	0.00815	0.02241	0.03738
0.0999915	0.00803	0.02311	0.06861	0.01129	0.03041	0.07316	0.0113	0.03042	0.05049
0.119989	0.00843	0.02452	0.07278	0.01434	0.03958	0.09943	0.01434	0.03959	0.06609
0.139986	0.00755	0.02198	0.06465	0.01758	0.05027	0.12957	0.01758	0.05029	0.08463
0.159984	0.00731	0.02162	0.0636	0.0213	0.0624	0.17082	0.02131	0.06244	0.10563
0.179981	0.0077	0.02262	0.06673	0.02514	0.07685	0.21676	0.02514	0.07691	0.13126
0.199978	0.00865	0.02503	0.07437	0.02935	0.09324	0.26861	0.02936	0.09333	0.1605
0.219976	0.00983	0.02869	0.08639	0.0341	0.11145	0.33043	0.03412	0.1116	0.19296
0.239973	0.01125	0.0337	0.1024	0.03924	0.13069	0.3996	0.03926	0.13091	0.22714
0.259985	0.01307	0.03987	0.12574	0.04551	0.15315	0.47613	0.04554	0.15348	0.26681
0.280012	0.01499	0.04769	0.15357	0.05259	0.17812	0.55602	0.05263	0.1786	0.31086
0.30004	0.01718	0.05693	0.1863	0.06045	0.20656	0.63583	0.06051	0.20724	0.36131
0.320067	0.01986	0.06766	0.22613	0.06951	0.23896	0.73162	0.0696	0.23992	0.41875
0.340094	0.02192	0.07562	0.25596	0.07693	0.26505	0.79104	0.07703	0.26622	0.46487
0.360121	0.02421	0.08404	0.28794	0.0848	0.29326	0.84404	0.08492	0.29468	0.51493
0.380148	0.02677	0.09344	0.32264	0.09319	0.32183	0.89013	0.09333	0.32353	0.56524
0.400175	0.02953	0.1034	0.36063	0.10205	0.35296	0.94233	0.10222	0.355	0.62043
0.420203	0.03247	0.11409	0.40034	0.11154	0.38651	1.00065	0.11174	0.38896	0.68003
0.44023	0.03564	0.12562	0.44076	0.12195	0.42146	1.05783	0.12219	0.42437	0.74166
0.460257	0.03909	0.13794	0.48326	0.13352	0.45756	1.09838	0.13382	0.46099	0.80452
0.480284	0.04259	0.15151	0.5246	0.14568	0.49719	1.14045	0.14604	0.50123	0.87419
0.500311	0.04648	0.16584	0.57958	0.15899	0.53717	1.19268	0.15941	0.54187	0.94344
0.520338	0.05068	0.18174	0.62614	0.17287	0.57658	1.23209	0.17337	0.58196	1.01098
0.540365	0.05598	0.2009	0.67294	0.1876	0.62876	1.26872	0.18819	0.63505	1.10425
0.560393	0.06159	0.22131	0.71214	0.20348	0.67434	1.30526	0.20417	0.68144	1.18257
0.58042	0.06755	0.24174	0.74315	0.22006	0.7157	1.33939	0.22087	0.72352	1.25131
0.600447	0.0738	0.26382	0.77674	0.23775	0.75319	1.37665	0.2387	0.76167	1.31079
0.620474	0.08049	0.28718	0.81208	0.2567	0.78541	1.40384	0.2578	0.79451	1.35804
0.640501	0.08781	0.31119	0.84506	0.27651	0.82382	1.43246	0.2778	0.8337	1.41739
0.660528	0.09592	0.33563	0.86629	0.2966	0.85473	1.45603	0.29809	0.86532	1.46091
0.680556	0.10443	0.36256	0.88668	0.31868	0.88828	1.47703	0.3204	0.89969	1.50795
0.700583	0.11383	0.38939	0.91246	0.34134	0.91707	1.4946	0.34332	0.92923	1.54444
0.72061	0.12349	0.41561	0.93021	0.36554	0.95514	1.51235	0.36782	0.9683	1.59881
0.740637	0.13369	0.45114	0.94615	0.39179	0.98223	1.52736	0.39442	0.99621	1.6281
0.760664	0.14454	0.48112	0.96061	0.41726	1.01412	1.54213	0.42024	1.02914	1.66848
0.780691	0.1558	0.50728	0.97225	0.44375	1.04239	1.54709	0.44713	1.05843	1.70029
0.800719	0.16776	0.52935	0.98432	0.47373	1.06928	1.55079	0.47759	1.08634	1.72552
0.820746	0.1805	0.54668	0.98913	0.5005	1.09193	1.54798	0.50482	1.10993	1.7453
0.840773	0.19352	0.56577	0.9941	0.5273	1.11014	1.54126	0.53209	1.12902	1.7558
0.8608	0.20652	0.579	0.99586	0.55653	1.12937	1.53084	0.56184	1.14925	1.76603
0.880827	0.2209	0.59343	0.9948	0.58481	1.14794	1.53112	0.59061	1.16885	1.776
0.900854	0.23541	0.60455	0.98985	0.6095	1.1625	1.52863	0.61576	1.18436	1.7814
0.920882	0.25066	0.61985	0.98322	0.63883	1.1746	1.50228	0.64566	1.19741	1.77674
0.940909	0.26707	0.62879	0.97487	0.66392	1.18449	1.4858	0.67132	1.20822	1.77197
0.960936	0.28259	0.6391	0.96579	0.68315	1.19304	1.47129	0.69105	1.21773	1.77075
0.980963	0.29854	0.64773	0.94956	0.70835	1.19895	1.46294	0.71691	1.22463	1.75772
1.00099	0.3164	0.65519	0.93195	0.73099	1.20714	1.46	0.74021	1.23389	1.75225
1.02102	0.33191	0.66001	0.90848	0.75133	1.22766	1.44793	0.76117	1.25601	1.7756
1.04104	0.3473	0.6622	0.8824	0.76851	1.23109	1.43184	0.77895	1.26051	1.76615
1.06107	0.36372	0.66366	0.85417	0.78658	1.23673	1.41248	0.79767	1.26732	1.76046
1.0811	0.37903	0.66483	0.82868	0.81434	1.23308	1.40895	0.82635	1.26447	1.7245
1.10113	0.39109	0.66355	0.80158	0.83105	1.22767	1.40421	0.84374	1.25985	1.69678
1.12115	0.40464	0.66005	0.75678	0.84411	1.22566	1.38987	0.85743	1.25878	1.68019
1.14118	0.41479	0.65475	0.72007	0.85748	1.22477	1.38288	0.87149	1.25888	1.66564
1.16121	0.4215	0.64709	0.68756	0.87081	1.20556	1.38751	0.88556	1.24029	1.61275
1.18123	0.4313	0.63755	0.66362	0.88752	1.19244	1.3872	0.90315	1.22791	1.56891
1.20126	0.43953	0.62917	0.64715	0.89771	1.18103	1.38789	0.91406	1.21727	1.53563
1.22129	0.44681	0.62543	0.62558	0.91066	1.17411	1.38401	0.92786	1.2112	1.50871
1.24132	0.4521	0.61417	0.60194	0.92012	1.17128	1.38902	0.9381	1.20928	1.49403
1.26134	0.45733	0.60412	0.57878	0.9314	1.17291	1.38482	0.95026	1.21221	1.48726
1.28137	0.46632	0.59017	0.5663	0.94131	1.1748	1.38255	0.96105	1.21524	1.48214
1.3014	0.46972	0.57417	0.5547	0.94367	1.17593	1.38069	0.96409	1.21753	1.48364
1.32142	0.47064	0.55886	0.53592	0.94835	1.17443	1.378	0.96956	1.21691	1.47664
1.34145	0.47134	0.54349	0.52238	0.94968	1.16285	1.37426	0.9716	1.20597	1.45206
1.36148	0.47163	0.51597	0.51266	0.95282	1.1672	1.36884	0.97556	1.21142	1.45906
1.38151	0.47309	0.49387	0.50262	0.95479	1.15637	1.36346	0.97828	1.20104	1.43493
1.40153	0.47169	0.47491	0.49438	0.95352	1.16046	1.36181	0.97766	1.20626	1.44628
1.42156	0.47103	0.4605	0.48503	0.95632	1.15237	1.36067	0.98136	1.19873	1.42697
1.44159	0.46842	0.44909	0.47997	0.95504	1.15207	1.36252	0.98075	1.19933	1.42884
1.46161	0.46632	0.43897	0.47166	0.95126	1.15825	1.36373	0.97757	1.2066	1.44709
1.48164	0.46349	0.4314	0.46423	0.94408	1.15501	1.36351	0.97096	1.20396	1.4486
1.50167	0.45689	0.42371	0.4578	0.93967	1.15427	1.34723	0.96725	1.20399	1.45257
1.5217	0.45141	0.41629	0.45103	0.93882	1.16056	1.3331	0.96716	1.2114	1.46785
1.54172	0.44412	0.40388	0.44256	0.93155	1.16295	1.33689	0.96051	1.21471	1.48161
1.56175	0.43696	0.39907	0.4345	0.92562	1.16418	1.33352	0.95513	1.21677	1.4915
1.58178	0.42974	0.38819	0.4239	0.92661	1.16467	1.33288	0.95681	1.21801	1.49227
1.6018	0.42088	0.38143	0.41696	0.91801	1.16273	1.32861	0.94861	1.21664	1.49808
1.62183	0.41203	0.37159	0.40908	0.91402	1.15733	1.32994	0.94516	1.21166	1.49148
1.64186	0.40271	0.36522	0.40458	0.91225	1.14989	1.33554	0.94397	1.20487	1.4788
1.66189	0.39237	0.36261	0.40051	0.91543	1.14491	1.3335	0.94788	1.20032	1.46538
1.68191	0.38016	0.35773	0.39683	0.91485	1.13705	1.33394	0.94793	1.19277	1.44984
1.70194	0.36995	0.3526	0.38668	0.90654	1.14128	1.33882	0.94014	1.19788	1.46851
1.72197	0.36285	0.34922	0.37725	0.90307	1.15512	1.34223	0.93721	1.21328	1.50314
1.742	0.35329	0.34536	0.37365	0.9078	1.15069	1.3401	0.9428	1.20942	1.48937
1.76202	0.34587	0.3412	0.36815	0.90498	1.14655	1.34819	0.94045	1.20583	1.48448
1.78205	0.34197	0.3382	0.36347	0.90286	1.15748	1.34336	0.93883	1.21804	1.5112
1.80208	0.33338	0.33462	0.35644	0.89979	1.17029	1.33853	0.93626	1.23215	1.54282
1.8221	0.3269	0.32922	0.35154	0.90061	1.18125	1.33327	0.93767	1.24431	1.56629
1.84213	0.32115	0.32033	0.34835	0.89633	1.17757	1.33531	0.9338	1.24104	1.56365
1.86216	0.31734	0.31456	0.34325	0.89956	1.17594	1.33764	0.93779	1.23997	1.55726
1.88219	0.31181	0.30703	0.33893	0.89564	1.16599	1.34409	0.93433	1.23021	1.54089
1.90221	0.30267	0.30429	0.33624	0.89274	1.17279	1.34561	0.93189	1.23803	1.55948
1.92224	0.29701	0.30298	0.33313	0.89661	1.17616	1.34537	0.93644	1.24225	1.56334
1.94227	0.29476	0.29696	0.33023	0.89608	1.17467	1.35023	0.9364	1.24124	1.56133
1.96229	0.29045	0.29197	0.33115	0.89319	1.17048	1.34525	0.93382	1.23741	1.55617
1.98232	0.28614	0.29305	0.32631	0.88611	1.17049	1.34729	0.92691	1.23818	1.56502
2.00235	0.28118	0.29419	0.32147	0.8821	1.17286	1.35053	0.92322	1.24125	1.57519
2.02238	0.2777	0.29391	0.3167	0.88511	1.16119	1.35161	0.92694	1.2295	1.54718
2.0424	0.27208	0.28873	0.31219	0.87755	1.17185	1.35119	0.91963	1.24129	1.57902
2.06243	0.26862	0.28492	0.30844	0.87545	1.17613	1.34703	0.91792	1.24636	1.59122
2.08246	0.26324	0.27858	0.30567	0.87616	1.17584	1.3471	0.91913	1.2467	1.59065
2.10248	0.25875	0.27874	0.30272	0.87473	1.17964	1.35355	0.91802	1.25134	1.60133
2.12251	0.25709	0.277	0.29994	0.87372	1.17837	1.37261	0.91741	1.25057	1.60039
2.14254	0.2536	0.27448	0.29884	0.86892	1.17541	1.37461	0.91281	1.24803	1.60001
2.16257	0.24953	0.27035	0.29587	0.86931	1.17262	1.36525	0.91367	1.24555	1.59403
2.18259	0.24401	0.2662	0.29287	0.86996	1.1828	1.3706	0.91477	1.25693	1.61619
2.20262	0.23922	0.26454	0.29065	0.8665	1.18984	1.36766	0.91155	1.265	1.63613
2.22265	0.23658	0.25974	0.2889	0.87161	1.18868	1.36539	0.91734	1.26424	1.62849
2.24267	0.23135	0.26042	0.28721	0.87182	1.19284	1.36104	0.91798	1.26917	1.63793
2.2627	0.22858	0.25879	0.28397	0.8705	1.18051	1.35774	0.917	1.25661	1.6132
2.28273	0.22662	0.2546	0.28186	0.86821	1.18163	1.38614	0.91501	1.25831	1.61878
2.30276	0.22474	0.25189	0.27997	0.86633	1.18533	1.38364	0.91341	1.2628	1.62966
2.32278	0.22183	0.2488	0.28022	0.85899	1.1835	1.38059	0.90606	1.26139	1.63449
2.34281	0.21764	0.24621	0.27805	0.86335	1.16872	1.38744	0.91104	1.24622	1.59816
2.36284	0.21479	0.24374	0.27363	0.85716	1.17793	1.38773	0.90489	1.25656	1.62582
2.38286	0.21262	0.24422	0.27324	0.85581	1.17799	1.38091	0.90382	1.25712	1.6281
2.40289	0.20944	0.24349	0.27058	0.85582	1.16751	1.38802	0.90423	1.24655	1.60599
2.42292	0.20903	0.24107	0.26827	0.8499	1.15166	1.38888	0.89839	1.23026	1.57873
2.44295	0.20709	0.24013	0.26469	0.84861	1.14452	1.39131	0.89741	1.22323	1.56533
2.46297	0.20478	0.23529	0.26205	0.85156	1.14463	1.39465	0.90091	1.22377	1.56277
2.483	0.20214	0.23341	0.26692	0.85003	1.15129	1.38411	0.89968	1.23139	1.57968
2.50303	0.19989	0.23231	0.26563	0.84578	1.14842	1.37951	0.8955	1.2288	1.57877
2.52305	0.19585	0.22984	0.26345	0.84591	1.13595	1.38163	0.896	1.21604	1.55208
2.54308	0.19482	0.22437	0.26198	0.84406	1.12311	1.38424	0.89443	1.20283	1.52664
2.56311	0.19089	0.22468	0.25912	0.83911	1.13395	1.38214	0.88956	1.21491	1.55653
2.58314	0.18854	0.22273	0.25457	0.84151	1.14021	1.38588	0.89247	1.22204	1.56809
2.60316	0.18678	0.21689	0.25476	0.84295	1.13404	1.40727	0.89436	1.21595	1.55363
2.62319	0.18326	0.21019	0.25366	0.84137	1.13467	1.39803	0.89302	1.2171	1.55739
2.64322	0.18143	0.20652	0.25221	0.83902	1.13924	1.4104	0.89089	1.22251	1.57071
2.66324	0.18067	0.20507	0.25022	0.83875	1.13105	1.41826	0.89092	1.21424	1.55373
2.68327	0.17872	0.20475	0.24597	0.83963	1.12401	1.42081	0.89219	1.20715	1.53785
2.7033	0.1761	0.20233	0.24323	0.84188	1.12336	1.41842	0.89493	1.20688	1.53442
2.72333	0.17376	0.197	0.24177	0.84453	1.12288	1.41074	0.8981	1.20676	1.53086
2.74335	0.17086	0.19188	0.23933	0.84583	1.12134	1.39527	0.89987	1.20554	1.52649
2.76338	0.16768	0.1924	0.23652	0.85316	1.11617	1.3951	0.90802	1.20046	1.50753
2.78341	0.16683	0.19264	0.2357	0.85201	1.11759	1.39672	0.90715	1.20241	1.51244
2.80343	0.16579	0.18991	0.23962	0.84995	1.10329	1.38925	0.90525	1.1875	1.48385
2.82346	0.16438	0.18877	0.23754	0.85263	1.09519	1.4076	0.90839	1.17925	1.46365
2.84349	0.16274	0.18844	0.23857	0.85511	1.09403	1.40781	0.91137	1.1784	1.45878
2.86352	0.16135	0.18621	0.23769	0.85655	1.09213	1.40826	0.91323	1.17685	1.45365
2.88354	0.15997	0.18411	0.23555	0.85421	1.09974	1.40271	0.91105	1.18555	1.47377
2.90357	0.15887	0.18371	0.23232	0.85137	1.10235	1.37687	0.90834	1.18873	1.48314
2.9236	0.15759	0.18266	0.22932	0.85049	1.09815	1.38328	0.9077	1.18458	1.47531
2.94362	0.15615	0.18053	0.22597	0.85747	1.09685	1.38227	0.91546	1.18356	1.46507
2.96365	0.15643	0.17719	0.22456	0.8541	1.1009	1.38865	0.91217	1.18839	1.47841
2.98368	0.15519	0.17603	0.22297	0.85997	1.0915	1.38527	0.91877	1.17876	1.45174
3.00371	0.15376	0.17194	0.21896	0.86089	1.09223	1.39432	0.92003	1.18001	1.45298
3.02373	0.15345	0.16901	0.22094	0.86174	1.0871	1.38463	0.92126	1.17483	1.44108
3.04376	0.15266	0.16789	0.22067	0.86798	1.0875	1.39666	0.92822	1.17566	1.43547
3.06379	0.15147	0.16624	0.22056	0.86642	1.08842	1.39633	0.92688	1.17716	1.43995
3.08381	0.14939	0.16672	0.21831	0.86065	1.08881	1.38782	0.92102	1.17802	1.44786
3.10384	0.14744	0.16715	0.21122	0.85834	1.08852	1.38671	0.91891	1.17818	1.45042
3.12387	0.14614	0.16596	0.21057	0.86081	1.09192	1.38081	0.92185	1.18222	1.45562
3.1439	0.14675	0.16514	0.20941	0.86132	1.09861	1.37884	0.92272	1.18986	1.47036
3.16392	0.1451	0.16486	0.21019	0.86292	1.1009	1.37742	0.92477	1.19277	1.47416
3.18395	0.14495	0.16157	0.20928	0.86489	1.08745	1.38054	0.92714	1.17872	1.44287
3.20398	0.14407	0.16027	0.20997	0.86451	1.0824	1.37956	0.927	1.1737	1.43274
3.224	0.14318	0.15898	0.20623	0.86271	1.08033	1.36189	0.92528	1.17186	1.43078
3.24403	0.14357	0.15811	0.20616	0.86045	1.08035	1.38546	0.92306	1.17227	1.43394
3.26406	0.1423	0.15699	0.20479	0.85852	1.07441	1.37056	0.92125	1.16619	1.42338
3.28409	0.14027	0.15623	0.20277	0.85639	1.07667	1.36055	0.91926	1.16909	1.4314
3.30411	0.13911	0.15538	0.20286	0.853	1.07379	1.35629	0.91592	1.16642	1.42945
3.32414	0.13901	0.15552	0.20161	0.84816	1.06657	1.36768	0.91104	1.1591	1.41955
3.34417	0.13864	0.15611	0.20011	0.84521	1.06254	1.37345	0.90818	1.15518	1.41453
3.3642	0.13837	0.15562	0.19879	0.844	1.06956	1.37232	0.90717	1.16325	1.43214
3.38422	0.13812	0.15167	0.19873	0.83947	1.06907	1.36874	0.9026	1.16308	1.43658
3.40425	0.1373	0.14942	0.19736	0.83599	1.08211	1.36642	0.89909	1.17773	1.4703
3.42428	0.13665	0.14809	0.19206	0.83652	1.08102	1.36276	0.89988	1.17695	1.46788
3.4443	0.13549	0.14751	0.19412	0.83545	1.08095	1.34257	0.899	1.17735	1.46963
3.46433	0.13391	0.14575	0.19034	0.82912	1.08277	1.35667	0.89248	1.1797	1.48129
3.48436	0.13212	0.14466	0.18799	0.8291	1.08263	1.35331	0.89274	1.17991	1.48144
3.50439	0.1302	0.14302	0.18671	0.82823	1.0742	1.36864	0.89204	1.1711	1.46411
3.52441	0.12832	0.13998	0.18745	0.83011	1.07454	1.36575	0.89433	1.17197	1.46349
3.54444	0.12731	0.13836	0.18695	0.82877	1.07703	1.36318	0.89315	1.17519	1.47134
3.56447	0.12685	0.13927	0.18473	0.82301	1.074	1.38457	0.88722	1.17238	1.4718
3.58449	0.12587	0.13889	0.1837	0.81833	1.0813	1.36454	0.8824	1.18088	1.49429
3.60452	0.12502	0.14026	0.1826	0.81321	1.07847	1.37059	0.87713	1.17819	1.4943
3.62455	0.12476	0.1388	0.18137	0.81769	1.07307	1.36027	0.8822	1.17274	1.4778
3.64458	0.12364	0.13747	0.17698	0.81187	1.07833	1.35759	0.87615	1.17895	1.49688
3.6646	0.12163	0.13686	0.17788	0.8114	1.08443	1.34609	0.87595	1.1861	1.51176
3.68463	0.12082	0.13618	0.17605	0.81158	1.07981	1.37062	0.87644	1.18153	1.50188
3.70466	0.12003	0.1344	0.17696	0.81085	1.08902	1.36532	0.87592	1.19207	1.52403
3.72468	0.1195	0.13311	0.17512	0.80696	1.08181	1.36645	0.87201	1.1846	1.51282
3.74471	0.11862	0.13194	0.17424	0.80663	1.0779	1.36858	0.87192	1.18076	1.50505
3.76474	0.11684	0.12969	0.17729	0.80111	1.07411	1.36973	0.86621	1.17708	1.50349
3.78477	0.11564	0.12955	0.17317	0.79735	1.08393	1.36592	0.86241	1.18832	1.53053
3.80479	0.11434	0.12863	0.17373	0.79817	1.08529	1.35951	0.86353	1.1902	1.5332
3.82482	0.11426	0.12724	0.17086	0.80165	1.0829	1.36477	0.86758	1.18798	1.5244
3.84485	0.11242	0.12689	0.16987	0.8127	1.08471	1.35978	0.87986	1.19041	1.51649
3.86487	0.11106	0.12683	0.16784	0.81507	1.08129	1.3387	0.88267	1.18711	1.50677
3.8849	0.11001	0.12516	0.17111	0.81667	1.08862	1.33669	0.88467	1.19561	1.52209
3.90493	0.10906	0.12581	0.17012	0.81595	1.08771	1.33821	0.88415	1.19507	1.52153
3.92496	0.10765	0.12431	0.16875	0.81383	1.09173	1.35271	0.88206	1.19981	1.53345
3.94498	0.1072	0.12301	0.16772	0.81666	1.09517	1.34887	0.88536	1.20393	1.53843
3.96501	0.10589	0.12135	0.16693	0.81421	1.09611	1.34454	0.88293	1.20535	1.54388
3.98504	0.10462	0.12128	0.16573	0.81219	1.09487	1.34184	0.88099	1.20449	1.54417
4.00506	0.10412	0.12067	0.1636	0.80829	1.09684	1.34272	0.877	1.20709	1.55368
4.02509	0.10388	0.11969	0.16337	0.81071	1.08074	1.34009	0.87988	1.1899	1.51542
4.04512	0.10429	0.11944	0.16138	0.80949	1.08164	1.34032	0.87879	1.19127	1.51937
4.06515	0.10403	0.11829	0.1574	0.80862	1.07972	1.33864	0.8781	1.18956	1.51659
4.08517	0.10377	0.11888	0.15632	0.80666	1.08516	1.33607	0.87621	1.19602	1.53182
4.1052	0.10337	0.11824	0.15558	0.81004	1.0846	1.35497	0.88017	1.19586	1.52733
4.12523	0.10279	0.11905	0.15643	0.80972	1.08607	1.33908	0.88004	1.19787	1.53158
4.14525	0.10284	0.11984	0.15442	0.80586	1.08142	1.33641	0.87609	1.19312	1.52601
4.16528	0.10177	0.11942	0.15272	0.80694	1.07479	1.33487	0.87752	1.18616	1.51024
4.18531	0.10064	0.11819	0.15212	0.81328	1.07242	1.32127	0.88472	1.1839	1.49804
4.20534	0.09921	0.11784	0.1517	0.81931	1.06062	1.33149	0.89158	1.17138	1.46517
4.22536	0.09887	0.11479	0.15088	0.81901	1.06506	1.32443	0.89155	1.17673	1.47616
4.24539	0.098	0.11451	0.15006	0.81596	1.06669	1.3226	0.88853	1.17895	1.4839
4.26542	0.09721	0.11419	0.14901	0.82473	1.06343	1.32533	0.89831	1.17581	1.46718
4.28544	0.09609	0.11447	0.14735	0.81856	1.06044	1.32597	0.89182	1.17298	1.4682
4.30547	0.09576	0.11409	0.1486	0.82023	1.05992	1.2994	0.89383	1.17277	1.46565
4.3255	0.09528	0.11354	0.14588	0.81962	1.05452	1.2999	0.89338	1.16718	1.45466
4.34553	0.09422	0.11249	0.14499	0.82354	1.06395	1.29728	0.89791	1.17802	1.47213
4.36555	0.09391	0.11156	0.14372	0.82232	1.07032	1.31212	0.89685	1.1855	1.48858
4.38558	0.09417	0.11101	0.14041	0.82416	1.0684	1.30884	0.8991	1.18385	1.48285
4.40561	0.09424	0.10897	0.14134	0.82344	1.06403	1.31155	0.89855	1.17958	1.47466
4.42563	0.09363	0.10895	0.13954	0.82197	1.06318	1.31783	0.89721	1.17904	1.47496
4.44566	0.09291	0.10865	0.13892	0.81774	1.06519	1.30975	0.89288	1.18165	1.48486
4.46569	0.09397	0.10798	0.13888	0.80518	1.06177	1.32507	0.87948	1.17824	1.49194
4.48572	0.09303	0.10761	0.13826	0.80407	1.06185	1.32667	0.87849	1.17866	1.49385
4.50574	0.09295	0.10772	0.1335	0.80155	1.0584	1.3276	0.87601	1.17525	1.48945
4.52577	0.09212	0.10749	0.133	0.79871	1.05409	1.33887	0.87316	1.17086	1.48344
4.5458	0.09167	0.10849	0.13317	0.80329	1.06158	1.33827	0.87843	1.17966	1.49595
4.56582	0.09048	0.10863	0.13566	0.79907	1.06512	1.32641	0.8741	1.18405	1.50951
4.58585	0.08996	0.10733	0.13513	0.80023	1.07153	1.34305	0.87558	1.19161	1.52345
4.60588	0.08955	0.106	0.13526	0.80304	1.0626	1.35069	0.87888	1.18212	1.50053
4.62591	0.08911	0.10555	0.13622	0.80435	1.06517	1.36207	0.88052	1.18544	1.50561
4.64593	0.08819	0.10574	0.13565	0.80779	1.08051	1.36432	0.88455	1.203	1.53738
4.66596	0.08612	0.10508	0.13817	0.80715	1.08029	1.36425	0.88409	1.20311	1.53808
4.68599	0.08576	0.10482	0.13811	0.80895	1.09033	1.36513	0.88633	1.21473	1.55955
4.70601	0.08507	0.10359	0.13791	0.81519	1.08609	1.35685	0.89345	1.21039	1.54317
4.72604	0.08441	0.10247	0.13904	0.80637	1.08785	1.34938	0.88407	1.21274	1.55785
4.74607	0.08463	0.10209	0.13905	0.80646	1.08448	1.34848	0.88441	1.20935	1.55054
4.7661	0.08364	0.10144	0.13769	0.81419	1.08508	1.36767	0.89315	1.21045	1.54361
4.78612	0.08354	0.10148	0.13959	0.81598	1.08898	1.3684	0.89537	1.21518	1.55098
4.80615	0.08371	0.09983	0.14017	0.81209	1.09641	1.3578	0.89137	1.22392	1.57309
4.82618	0.08365	0.09937	0.14112	0.81293	1.09315	1.35125	0.89252	1.22072	1.56533
4.8462	0.08334	0.10092	0.14123	0.81147	1.09671	1.37259	0.89114	1.22517	1.5759
4.86623	0.08251	0.10089	0.14098	0.81217	1.09901	1.37218	0.89217	1.22815	1.58093
4.88626	0.08217	0.10205	0.14079	0.80662	1.10337	1.37159	0.88636	1.23337	1.59774
4.90629	0.08249	0.10155	0.13942	0.80599	1.10004	1.37933	0.88593	1.23003	1.59133
4.92631	0.08106	0.10129	0.13894	0.80506	1.11051	1.39208	0.88522	1.24219	1.61702
4.94634	0.08084	0.10043	0.13933	0.8061	1.1125	1.39515	0.88659	1.24491	1.62113
4.96637	0.08152	0.09981	0.14183	0.8035	1.10483	1.39783	0.88399	1.23681	1.60727
4.98639	0.08139	0.09969	0.14171	0.80383	1.10109	1.3807	0.88458	1.23308	1.59901
5.00642	0.08086	0.09988	0.13935	0.80099	1.09969	1.38124	0.88169	1.2319	1.59962
5.02645	0.081	0.09908	0.13749	0.79932	1.0992	1.38253	0.88009	1.2318	1.6011
5.04648	0.08062	0.0992	0.13974	0.80525	1.09881	1.38001	0.88687	1.23175	1.59389
5.0665	0.08049	0.09943	0.13989	0.80474	1.10163	1.38169	0.88653	1.2353	1.60151
5.08653	0.07922	0.10005	0.14005	0.80941	1.10109	1.36183	0.89192	1.23506	1.59535
5.10656	0.07859	0.09967	0.14082	0.81308	1.11401	1.36793	0.89624	1.24998	1.62141
5.12659	0.078	0.10029	0.14187	0.81212	1.11179	1.37199	0.89546	1.24786	1.61789
5.14661	0.07807	0.09945	0.14148	0.81324	1.11274	1.35654	0.89691	1.24931	1.61932
5.16664	0.07772	0.09777	0.14098	0.81236	1.10869	1.35375	0.8962	1.24528	1.61182
5.18667	0.07759	0.09696	0.13804	0.81578	1.10148	1.35324	0.90022	1.23766	1.59197
5.20669	0.07695	0.09661	0.13785	0.81833	1.09577	1.33424	0.90327	1.23169	1.57654
5.22672	0.07617	0.09653	0.13752	0.81786	1.09734	1.3356	0.90304	1.23378	1.58106
5.24675	0.07629	0.09597	0.13659	0.81751	1.09919	1.32478	0.90289	1.23622	1.58622
5.26678	0.07579	0.0957	0.13574	0.81541	1.09092	1.32498	0.90083	1.2274	1.5703
5.2868	0.07584	0.09536	0.1327	0.81921	1.0911	1.32265	0.90525	1.22798	1.56684
5.30683	0.07568	0.0964	0.13285	0.81424	1.08315	1.32785	0.89999	1.21953	1.55504
5.32686	0.075	0.09625	0.13282	0.811	1.08689	1.32354	0.89667	1.22422	1.56816
5.34688	0.07479	0.09587	0.13042	0.81263	1.08239	1.31461	0.89871	1.21957	1.55647
5.36691	0.07459	0.09496	0.12944	0.81437	1.08441	1.31382	0.90087	1.22223	1.55965
5.38694	0.07489	0.09373	0.12941	0.80986	1.0939	1.29154	0.89617	1.23336	1.58742
5.40697	0.07488	0.09302	0.12702	0.80681	1.10037	1.28767	0.89304	1.24111	1.60658
5.42699	0.0744	0.09333	0.12676	0.80485	1.09405	1.28888	0.89112	1.23435	1.59474
5.44702	0.07377	0.09394	0.12513	0.80053	1.09515	1.29013	0.88659	1.23592	1.60272
5.46705	0.0732	0.09281	0.12486	0.80644	1.0916	1.26981	0.89338	1.23235	1.58827
5.48707	0.07337	0.09216	0.12472	0.8071	1.0846	1.26952	0.89436	1.22485	1.57187
5.5071	0.07258	0.09033	0.12529	0.80832	1.07837	1.26699	0.89594	1.21828	1.55673
5.52713	0.07191	0.08997	0.12433	0.80874	1.09129	1.25646	0.89662	1.23339	1.58701
5.54716	0.07186	0.08949	0.12213	0.81122	1.07673	1.24055	0.89962	1.21738	1.55102
5.56718	0.07186	0.09005	0.12117	0.81067	1.06792	1.25794	0.89926	1.2078	1.53177
5.58721	0.07128	0.09166	0.11767	0.80928	1.06478	1.25458	0.89797	1.20462	1.5266
5.60724	0.0711	0.09253	0.11653	0.81556	1.06012	1.2734	0.9052	1.19977	1.50907
5.62726	0.07084	0.09204	0.11608	0.81543	1.06752	1.2707	0.90526	1.20866	1.52723
5.64729	0.0704	0.09222	0.11558	0.81719	1.05917	1.269	0.90741	1.19967	1.50653
5.66732	0.07119	0.09166	0.11291	0.81205	1.05871	1.26402	0.90199	1.19949	1.51188
5.68735	0.07115	0.0906	0.11282	0.8088	1.0588	1.28501	0.89862	1.20001	1.51647
5.70737	0.07128	0.08906	0.11199	0.81232	1.06698	1.29	0.9028	1.20977	1.53208
5.7274	0.07128	0.08945	0.11066	0.81499	1.05414	1.27847	0.90602	1.19573	1.49992
5.74743	0.07144	0.08755	0.10885	0.8133	1.05617	1.27312	0.90435	1.19847	1.5073
5.76745	0.07125	0.08644	0.10973	0.81859	1.06749	1.27878	0.91048	1.21175	1.52808
5.78748	0.07101	0.08608	0.10839	0.81754	1.0655	1.26829	0.90954	1.2099	1.52527
5.80751	0.07169	0.08534	0.10914	0.81714	1.06469	1.27335	0.90934	1.2093	1.52426
5.82754	0.07181	0.08557	0.10799	0.81399	1.06327	1.27213	0.90607	1.20805	1.52513
5.84756	0.07212	0.08437	0.10778	0.8107	1.06621	1.28248	0.90268	1.21184	1.53646
5.86759	0.07139	0.08443	0.10692	0.8118	1.06218	1.28975	0.90415	1.2078	1.52663
5.88762	0.07072	0.08469	0.1087	0.81123	1.05472	1.2879	0.9038	1.1998	1.5106
5.90764	0.07077	0.08525	0.10869	0.8121	1.05343	1.31052	0.90505	1.19869	1.507
5.92767	0.07089	0.0835	0.10726	0.81592	1.05425	1.31825	0.90953	1.20002	1.50503
5.9477	0.07068	0.08313	0.10655	0.81984	1.05125	1.32361	0.91416	1.19703	1.49404
5.96773	0.07102	0.08443	0.10707	0.82154	1.05281	1.32188	0.91628	1.19921	1.49628
5.98775	0.07058	0.08472	0.1054	0.82044	1.05299	1.32762	0.91526	1.19981	1.49859
6.00778	0.07021	0.08512	0.10481	0.81987	1.04364	1.33093	0.91482	1.18962	1.47816
6.02781	0.06977	0.08511	0.10414	0.81834	1.0527	1.32945	0.91332	1.20045	1.50193
6.04783	0.06906	0.08502	0.10449	0.81604	1.05061	1.32811	0.91096	1.19841	1.50022
6.06786	0.06915	0.0837	0.10494	0.81322	1.05895	1.32247	0.90806	1.20837	1.5237
6.08789	0.06899	0.08245	0.10418	0.81093	1.06138	1.32366	0.90577	1.21167	1.53286
6.10792	0.06901	0.08244	0.10567	0.80963	1.06324	1.3396	0.90459	1.21415	1.5392
6.12794	0.06949	0.08275	0.10595	0.81244	1.06303	1.33921	0.90801	1.21428	1.53586
6.14797	0.07002	0.0824	0.10629	0.81138	1.05652	1.33802	0.90707	1.20733	1.5226
6.168	0.07037	0.08203	0.10593	0.81387	1.06355	1.34225	0.91013	1.21576	1.53667
6.18802	0.07034	0.08142	0.10601	0.81379	1.06945	1.31995	0.91025	1.22293	1.55125
6.20805	0.07016	0.07978	0.10632	0.8152	1.07151	1.32012	0.91206	1.22571	1.55504
6.22808	0.06963	0.08035	0.10634	0.80765	1.07378	1.30221	0.90388	1.22866	1.56969
6.24811	0.06882	0.08006	0.10631	0.81367	1.06598	1.30065	0.91086	1.22013	1.54486
6.26813	0.06773	0.08045	0.10564	0.81274	1.06482	1.31236	0.91007	1.21915	1.54368
6.28816	0.06675	0.08007	0.10491	0.8086	1.07251	1.32843	0.90568	1.22839	1.56724
6.30819	0.0661	0.07988	0.10548	0.81357	1.07134	1.30403	0.91149	1.2275	1.55931
6.32821	0.06588	0.07976	0.10511	0.80937	1.06416	1.31667	0.90707	1.21967	1.54791
6.34824	0.06544	0.07943	0.10494	0.80259	1.06287	1.31521	0.89973	1.21853	1.55327
6.36827	0.06536	0.08022	0.10545	0.80317	1.06405	1.31454	0.90058	1.22028	1.55596
6.3883	0.06518	0.08074	0.10365	0.80333	1.0535	1.31434	0.90105	1.20869	1.53171
6.40832	0.06499	0.0807	0.10391	0.80228	1.05889	1.31314	0.90011	1.21538	1.54641
6.42835	0.06391	0.08088	0.10209	0.80081	1.05887	1.30658	0.89873	1.2158	1.54872
6.44838	0.06408	0.08036	0.10175	0.80081	1.06377	1.30638	0.89896	1.22192	1.56102
6.4684	0.06365	0.08053	0.10216	0.8013	1.06342	1.28409	0.89975	1.22191	1.56017
6.48843	0.06302	0.08116	0.10342	0.80221	1.05827	1.27403	0.90102	1.21632	1.54739
6.50846	0.0633	0.0806	0.10113	0.80049	1.05752	1.27334	0.89935	1.21582	1.54811
6.52849	0.06284	0.07975	0.10238	0.79676	1.06121	1.25024	0.89539	1.22047	1.5618
6.54851	0.06215	0.07968	0.10208	0.79634	1.05434	1.23989	0.89512	1.21298	1.54674
6.56854	0.06212	0.0798	0.10169	0.78792	1.05105	1.23641	0.88591	1.2096	1.54948
6.58857	0.06196	0.07838	0.10118	0.78676	1.04945	1.23587	0.88485	1.20812	1.54755
6.60859	0.06159	0.07791	0.1006	0.7901	1.06386	1.2302	0.88883	1.22516	1.57831
6.62862	0.06115	0.07719	0.09979	0.78992	1.07153	1.22798	0.8889	1.23444	1.59727
6.64865	0.06092	0.07711	0.09924	0.79283	1.06138	1.23809	0.89244	1.22338	1.57086
6.66868	0.06098	0.07706	0.09678	0.79284	1.06718	1.24783	0.89272	1.23053	1.58522
6.6887	0.06093	0.07704	0.09564	0.79415	1.06394	1.25351	0.89442	1.22732	1.57687
6.70873	0.06073	0.07696	0.09561	0.79178	1.05518	1.25342	0.89201	1.21759	1.55946
6.72876	0.06026	0.07721	0.09351	0.78894	1.05766	1.25829	0.88904	1.22078	1.56911
6.74879	0.05992	0.0761	0.09242	0.79183	1.068	1.26557	0.89256	1.23315	1.59076
6.76881	0.05871	0.07556	0.09184	0.79313	1.06167	1.26857	0.89425	1.22635	1.57506
6.78884	0.05805	0.0754	0.09159	0.78811	1.05573	1.26548	0.88887	1.21999	1.56767
6.80887	0.05773	0.07673	0.09154	0.79054	1.05477	1.27299	0.89185	1.2193	1.56313
6.82889	0.05713	0.07752	0.09137	0.78641	1.05308	1.27213	0.88742	1.21771	1.56451
6.84892	0.05699	0.07619	0.09247	0.78524	1.0514	1.26909	0.88629	1.21612	1.56244
6.86895	0.0568	0.07624	0.09325	0.77785	1.04878	1.26604	0.87819	1.21348	1.56553
6.88898	0.05704	0.07586	0.09342	0.78009	1.05384	1.24813	0.88096	1.21975	1.57549
6.909	0.05714	0.0756	0.09325	0.78504	1.04641	1.2356	0.8868	1.2116	1.55265
6.92903	0.05707	0.07648	0.09298	0.7822	1.04223	1.23845	0.88386	1.20712	1.54654
6.94906	0.05752	0.07752	0.09305	0.77827	1.04628	1.22054	0.87967	1.21218	1.56131
6.96908	0.05759	0.07633	0.09246	0.78046	1.06035	1.22393	0.88238	1.22887	1.59268
6.98911	0.0569	0.07503	0.09139	0.78262	1.0551	1.22086	0.88507	1.22322	1.57828
7.00914	0.0569	0.07455	0.09186	0.78047	1.05569	1.21297	0.88286	1.22439	1.583
7.02917	0.05651	0.0746	0.09192	0.78101	1.05435	1.21071	0.88368	1.22342	1.58014
7.04919	0.0565	0.07468	0.09238	0.78198	1.05518	1.22171	0.885	1.22473	1.58145
7.06922	0.05585	0.07442	0.09234	0.78265	1.04849	1.22638	0.88597	1.21729	1.56517
7.08925	0.05581	0.0746	0.09069	0.78629	1.04564	1.25293	0.89035	1.21438	1.5546
7.10927	0.05593	0.07357	0.08896	0.78193	1.04506	1.25255	0.88565	1.21414	1.55906
7.1293	0.05546	0.07308	0.08852	0.78103	1.04787	1.25268	0.88487	1.21789	1.56757
7.14933	0.05499	0.07346	0.08664	0.78463	1.05077	1.25707	0.88918	1.22172	1.57088
7.16936	0.0552	0.07435	0.08713	0.78661	1.0534	1.25478	0.89168	1.22508	1.57515
7.18938	0.05538	0.07355	0.08733	0.78631	1.06629	1.25336	0.89159	1.2404	1.60666
7.20941	0.05544	0.07282	0.08696	0.78268	1.07237	1.2538	0.88772	1.24784	1.62596
7.22944	0.05548	0.07209	0.08699	0.78449	1.05655	1.25164	0.89005	1.22994	1.58682
7.24946	0.05543	0.07218	0.08796	0.784	1.05187	1.25126	0.88974	1.22505	1.57714
7.26949	0.05513	0.07192	0.08861	0.78328	1.04347	1.2536	0.88915	1.21573	1.55863
7.28952	0.05479	0.07197	0.0913	0.78842	1.05214	1.24322	0.89521	1.22631	1.57396
7.30955	0.05405	0.07147	0.0917	0.78956	1.04963	1.23956	0.89672	1.22379	1.56722
7.32957	0.05353	0.07114	0.0922	0.79007	1.05072	1.2552	0.89756	1.22545	1.56972
7.3496	0.05368	0.07084	0.09254	0.792	1.0486	1.23315	0.89999	1.2234	1.56298
7.36963	0.05378	0.07115	0.09171	0.78428	1.04019	1.22627	0.89148	1.21408	1.55281
7.38965	0.05367	0.07264	0.09125	0.78428	1.03937	1.2203	0.89168	1.21356	1.55154
7.40968	0.05331	0.07324	0.09109	0.78304	1.04477	1.21948	0.89049	1.2203	1.5666
7.42971	0.05354	0.07117	0.09054	0.77791	1.04523	1.21213	0.88488	1.22123	1.57439
7.44974	0.0537	0.06953	0.09017	0.78401	1.06038	1.21379	0.89207	1.23939	1.60407
7.46976	0.05383	0.06795	0.08975	0.78253	1.05815	1.21687	0.89064	1.23716	1.60101
7.48979	0.05437	0.06823	0.08836	0.78806	1.06302	1.21832	0.89719	1.24327	1.60664
7.50982	0.05436	0.06816	0.08827	0.78361	1.06413	1.22024	0.89236	1.24503	1.61534
7.52984	0.05406	0.06847	0.09052	0.78019	1.06274	1.21542	0.88869	1.24379	1.61666
7.54987	0.05405	0.06804	0.08974	0.78481	1.06523	1.2327	0.89416	1.24714	1.61778
7.5699	0.05309	0.067	0.09012	0.78724	1.05846	1.23313	0.89712	1.23967	1.59934
7.58993	0.05311	0.06668	0.08988	0.78639	1.04362	1.22841	0.89638	1.22274	1.56543
7.60995	0.05304	0.06701	0.08982	0.78507	1.04232	1.23384	0.8951	1.22155	1.56432
7.62998	0.05247	0.067	0.08862	0.78748	1.04443	1.23438	0.89813	1.22439	1.56696
7.65001	0.05269	0.06806	0.08829	0.78618	1.03805	1.24662	0.89687	1.21737	1.55388
7.67003	0.05217	0.06758	0.08771	0.78616	1.03922	1.24255	0.8971	1.21919	1.55738
7.69006	0.05235	0.06768	0.08743	0.78751	1.0485	1.24222	0.89889	1.23057	1.57884
7.71009	0.05192	0.06718	0.08749	0.78587	1.05027	1.2185	0.89728	1.23303	1.58557
7.73012	0.0517	0.06678	0.08736	0.78702	1.05392	1.21873	0.89883	1.23762	1.59334
7.75014	0.05219	0.06664	0.08886	0.78899	1.0558	1.21747	0.90131	1.24017	1.59597
7.77017	0.05237	0.06592	0.08858	0.78845	1.05258	1.2175	0.90096	1.2368	1.58943
7.7902	0.052	0.06489	0.0877	0.78736	1.05679	1.21232	0.89996	1.2422	1.60154
7.81022	0.0516	0.06464	0.08738	0.79023	1.04833	1.21578	0.90343	1.23287	1.57877
7.83025	0.05138	0.06489	0.08692	0.79663	1.04854	1.21838	0.91098	1.23364	1.57244
7.85028	0.05118	0.06443	0.08775	0.79286	1.05078	1.22077	0.90691	1.23668	1.58295
7.87031	0.05104	0.0641	0.0874	0.79847	1.04874	1.22054	0.91359	1.23465	1.57177
7.89033	0.05108	0.0645	0.0871	0.79749	1.04854	1.2219	0.91268	1.23473	1.57287
7.91036	0.05096	0.06453	0.0842	0.795	1.03996	1.21912	0.91009	1.22509	1.55584
7.93039	0.05096	0.06534	0.08333	0.79333	1.04047	1.21499	0.90842	1.22617	1.5598
7.95041	0.05107	0.06642	0.08258	0.79099	1.04085	1.2142	0.90597	1.22705	1.56417
7.97044	0.05095	0.06649	0.08256	0.79014	1.043	1.22675	0.90523	1.23001	1.57103
7.99047	0.05076	0.06648	0.08232	0.79155	1.03996	1.22633	0.90708	1.2268	1.5625
8.01	0.05093	0.06504	0.08268	0.79229	1.0384	1.23087	0.90816	1.22529	1.55826
8.02907	0.05126	0.06451	0.08253	0.79364	1.03257	1.24351	0.90996	1.21876	1.543
8.04814	0.05086	0.06471	0.08202	0.79763	1.03482	1.24527	0.91474	1.22186	1.54435
8.06722	0.0511	0.06506	0.08166	0.79385	1.01944	1.24339	0.91065	1.20423	1.51248
8.08629	0.05073	0.06556	0.08177	0.79481	1.02446	1.24342	0.91196	1.21061	1.52418
8.10536	0.05019	0.06502	0.08202	0.7942	1.02174	1.26538	0.91152	1.20788	1.51907
8.12444	0.0498	0.06463	0.08156	0.79411	1.01532	1.26578	0.91164	1.20074	1.5043
8.14351	0.04949	0.06394	0.08067	0.79355	1.01449	1.26424	0.91123	1.20011	1.50344
8.16258	0.0494	0.0635	0.08089	0.78675	1.01093	1.24492	0.9037	1.19622	1.50338
8.18166	0.04955	0.06292	0.07996	0.78751	1.00912	1.25141	0.90481	1.19442	1.49851
8.20073	0.0494	0.06275	0.08016	0.78971	1.01182	1.25431	0.90754	1.19801	1.50301
8.2198	0.04938	0.06218	0.08085	0.79216	1.0151	1.25136	0.91058	1.20233	1.50866
8.23888	0.04963	0.06173	0.08071	0.78593	1.011	1.24877	0.90369	1.19797	1.50696
8.25795	0.04923	0.05979	0.08024	0.78789	1.00926	1.24455	0.90621	1.19629	1.50088
8.27703	0.04916	0.05964	0.0802	0.78481	1.00837	1.24445	0.90293	1.19558	1.50287
8.2961	0.04894	0.05906	0.08207	0.78542	1.00146	1.2389	0.90386	1.18777	1.48587
8.31517	0.04888	0.05843	0.08216	0.7819	0.99632	1.24807	0.90005	1.18202	1.47809
8.33425	0.04882	0.05852	0.08194	0.78591	0.99818	1.26342	0.9049	1.1847	1.47849
8.35332	0.04816	0.05852	0.08018	0.7939	0.99768	1.26442	0.91435	1.1846	1.46836
8.37239	0.04814	0.05844	0.08036	0.7952	1.0025	1.26069	0.9161	1.19078	1.47918
8.39147	0.04841	0.05834	0.08053	0.79835	0.9967	1.26352	0.91998	1.1843	1.46183
8.41054	0.04865	0.05842	0.08051	0.80048	0.9941	1.26037	0.92266	1.18161	1.45349
8.42961	0.04805	0.05784	0.08055	0.79327	0.99623	1.26623	0.91459	1.18461	1.46813
8.44869	0.04795	0.05766	0.07989	0.79541	0.99167	1.26764	0.91728	1.17957	1.45497
8.46776	0.0476	0.05801	0.07932	0.78974	0.98926	1.27135	0.91099	1.17714	1.45659
8.48683	0.04771	0.05764	0.07878	0.79119	0.98951	1.25604	0.91288	1.17781	1.45599
8.50591	0.04756	0.05715	0.08012	0.79129	0.98262	1.26365	0.91324	1.17	1.43959
8.52498	0.04797	0.05682	0.08208	0.79276	0.98152	1.26239	0.91515	1.16913	1.4358
8.54405	0.04856	0.05577	0.0822	0.79234	0.97763	1.24377	0.91491	1.16488	1.42734
8.56313	0.04859	0.05542	0.08156	0.79275	0.97594	1.23347	0.91563	1.16328	1.42332
8.5822	0.0486	0.05488	0.08158	0.79214	0.97504	1.22888	0.91518	1.16259	1.42237
8.60127	0.04848	0.0547	0.08129	0.79208	0.97221	1.23155	0.91538	1.15962	1.41607
8.62035	0.04771	0.05497	0.08214	0.78823	0.97584	1.22028	0.91121	1.16435	1.43015
8.63942	0.04748	0.05463	0.08256	0.7849	0.97302	1.21748	0.90759	1.16142	1.42794
8.65849	0.04677	0.0544	0.08294	0.78782	0.97493	1.21696	0.91122	1.16409	1.4296
8.67757	0.04672	0.0541	0.08134	0.78759	0.97419	1.21614	0.91115	1.1636	1.42868
8.69664	0.04658	0.05347	0.08143	0.78477	0.97604	1.2027	0.90812	1.16619	1.43717
8.71572	0.04659	0.05325	0.08084	0.79171	0.97436	1.2033	0.91635	1.16452	1.42509
8.73479	0.04633	0.05296	0.07868	0.79815	0.98285	1.203	0.92404	1.1751	1.43872
8.75386	0.04607	0.05291	0.0775	0.79742	0.98862	1.20177	0.92341	1.18245	1.45445
8.77294	0.04573	0.05302	0.07682	0.79616	0.99885	1.19486	0.9222	1.19516	1.48177
8.79201	0.04554	0.05292	0.07677	0.79121	0.99564	1.20029	0.91673	1.1917	1.48042
8.81108	0.04496	0.05334	0.07621	0.78738	0.99238	1.19945	0.91255	1.18816	1.47755
8.83016	0.04457	0.05344	0.07657	0.7918	0.99512	1.20354	0.9179	1.19178	1.47935
8.84923	0.04475	0.05377	0.07681	0.78734	0.99978	1.19335	0.91293	1.19777	1.49685
8.8683	0.04475	0.0537	0.07698	0.78641	0.99754	1.18499	0.91206	1.19551	1.49313
8.88738	0.04452	0.05372	0.07561	0.78744	0.99873	1.19024	0.91351	1.19744	1.49556
8.90645	0.04492	0.0535	0.07531	0.78555	1.00076	1.18825	0.91154	1.2003	1.5035
8.92552	0.04522	0.0538	0.0751	0.78112	1.00607	1.17179	0.90664	1.20712	1.52262
8.9446	0.04501	0.05393	0.07493	0.76898	1.01208	1.17202	0.89283	1.21472	1.55271
8.96367	0.04464	0.05442	0.07464	0.76386	1.00929	1.17158	0.88716	1.21179	1.55265
8.98274	0.04398	0.05439	0.07492	0.76065	1.01943	1.17006	0.88372	1.22441	1.58214
9.00182	0.0435	0.05441	0.07453	0.75748	1.02847	1.18865	0.8803	1.23576	1.60899
9.02089	0.04381	0.05506	0.07453	0.76049	1.02765	1.19284	0.88404	1.23531	1.60416
9.03996	0.04351	0.05547	0.07395	0.75894	1.0283	1.19084	0.88249	1.23647	1.60816
9.05904	0.04335	0.05478	0.0736	0.75579	1.03002	1.18691	0.87904	1.23895	1.61687
9.07811	0.04316	0.05415	0.07389	0.75372	1.03159	1.18773	0.87683	1.24123	1.62385
9.09719	0.04282	0.05361	0.07277	0.75441	1.03569	1.18022	0.87788	1.24654	1.63364
9.11626	0.04234	0.05363	0.07046	0.75873	1.03227	1.18639	0.88319	1.24283	1.62046
9.13533	0.04144	0.05426	0.06983	0.76219	1.03934	1.19764	0.88747	1.25175	1.63425
9.15441	0.041	0.05437	0.06944	0.76061	1.04356	1.19639	0.88587	1.25729	1.64728
9.17348	0.04074	0.05491	0.06948	0.76089	1.0489	1.19799	0.88644	1.26414	1.66073
9.19255	0.04056	0.05515	0.07122	0.76275	1.05177	1.1911	0.88884	1.26797	1.66605
9.21163	0.04083	0.05463	0.07145	0.76165	1.05082	1.20865	0.88774	1.26725	1.66574
9.2307	0.04086	0.05466	0.07113	0.76315	1.04901	1.21599	0.8897	1.26548	1.66005
9.24977	0.04084	0.05478	0.07061	0.7572	1.04645	1.21497	0.88301	1.2628	1.66158
9.26885	0.04088	0.05498	0.07079	0.7582	1.04386	1.2157	0.8844	1.26007	1.65452
9.28792	0.04089	0.05525	0.07031	0.75773	1.03748	1.21916	0.88405	1.25277	1.63992
9.30699	0.0409	0.05498	0.07092	0.75385	1.04191	1.21658	0.8798	1.25852	1.65619
9.32607	0.04087	0.05515	0.07182	0.74994	1.03416	1.21789	0.87552	1.24961	1.6424
9.34514	0.04065	0.05508	0.07154	0.75183	1.03075	1.21799	0.87796	1.2459	1.63224
9.36421	0.04079	0.05516	0.07171	0.75667	1.02364	1.21932	0.88388	1.23771	1.60922
9.38329	0.04112	0.05518	0.07138	0.75657	1.02681	1.21205	0.88397	1.2419	1.61773
9.40236	0.0413	0.05484	0.07244	0.75813	1.034	1.22502	0.88606	1.251	1.63418
9.42143	0.04149	0.0546	0.07252	0.75493	1.03217	1.2245	0.88262	1.24927	1.63427
9.44051	0.04096	0.0542	0.07176	0.75803	1.02592	1.22681	0.88647	1.2422	1.61571
9.45958	0.04083	0.05397	0.07103	0.75781	1.02581	1.227	0.8864	1.24241	1.61621
9.47865	0.04076	0.05347	0.07101	0.7626	1.02305	1.22259	0.89223	1.23939	1.60391
9.49773	0.04041	0.05372	0.07126	0.76651	1.02486	1.21037	0.89699	1.24192	1.60409
9.5168	0.03999	0.05315	0.07152	0.76572	1.01367	1.20807	0.89628	1.22882	1.57799
9.53588	0.0399	0.05288	0.07153	0.76766	1.0042	1.20623	0.89879	1.21789	1.55296
9.55495	0.04006	0.05258	0.07143	0.76532	1.00053	1.21377	0.89628	1.21393	1.54746
9.57402	0.03998	0.05274	0.07089	0.76326	0.99499	1.21267	0.89411	1.20765	1.53686
9.5931	0.03999	0.0532	0.07197	0.76083	0.98445	1.1907	0.89149	1.19531	1.51433
9.61217	0.03946	0.05281	0.07179	0.76178	0.97698	1.17361	0.89282	1.18668	1.49523
9.63124	0.03953	0.05211	0.07173	0.76364	0.97828	1.17054	0.89528	1.18866	1.49671
9.65032	0.03949	0.05215	0.07136	0.76353	0.97344	1.17025	0.8954	1.1832	1.48539
9.66939	0.03991	0.0525	0.07088	0.76289	0.97001	1.16819	0.89489	1.17944	1.47821
9.68846	0.04017	0.05293	0.07028	0.76414	0.98059	1.16723	0.89661	1.19279	1.50377
9.70754	0.03991	0.05238	0.07034	0.75662	0.97778	1.1621	0.88798	1.18973	1.50657
9.72661	0.03963	0.05145	0.07026	0.757	0.98663	1.14948	0.88866	1.20101	1.52897
9.74568	0.03916	0.05085	0.0705	0.76159	0.98248	1.15154	0.8943	1.19644	1.51369
9.76476	0.03882	0.05053	0.06993	0.76171	0.97721	1.15563	0.8947	1.19047	1.50103
9.78383	0.03854	0.05011	0.06756	0.7573	0.97589	1.15256	0.88978	1.18928	1.50376
9.8029	0.03849	0.04973	0.06597	0.75848	0.97214	1.12865	0.89139	1.18509	1.49347
9.82198	0.03849	0.0496	0.06585	0.75872	0.96782	1.11906	0.89189	1.18017	1.48286
9.84105	0.03822	0.04883	0.06579	0.75777	0.96496	1.12688	0.89098	1.17702	1.47737
9.86012	0.0379	0.04834	0.06543	0.75815	0.96226	1.13023	0.89165	1.17415	1.47079
9.8792	0.03794	0.04876	0.06512	0.75615	0.96451	1.1352	0.88953	1.17732	1.4795
9.89827	0.03767	0.04853	0.06442	0.75569	0.96807	1.14657	0.88923	1.18211	1.48964
9.91735	0.03784	0.04901	0.06342	0.7506	0.97259	1.14454	0.88344	1.18797	1.50774
9.93642	0.03797	0.04866	0.06375	0.75268	0.97282	1.14643	0.88611	1.18865	1.50631
9.95549	0.03753	0.04812	0.06412	0.74997	0.97915	1.14503	0.8832	1.19685	1.52619
9.97457	0.03685	0.04803	0.0637	0.75301	0.97707	1.14351	0.88701	1.19477	1.51791
9.99364	0.03674	0.04813	0.0618	0.75248	0.97042	1.14007	0.88664	1.18711	1.5026
10.0127	0.03674	0.04825	0.06078	0.75241	0.96785	1.13552	0.88677	1.18439	1.49688
10.0318	0.0367	0.04839	0.06121	0.75418	0.96575	1.13353	0.88909	1.18218	1.48992
10.0509	0.03676	0.04837	0.06153	0.76095	0.96845	1.13546	0.89731	1.1859	1.48892
10.0699	0.03655	0.04844	0.06192	0.75323	0.97298	1.13388	0.88851	1.19195	1.51057
10.089	0.03645	0.04841	0.06272	0.75321	0.96848	1.13326	0.88875	1.18691	1.49997
10.1081	0.03617	0.04876	0.06271	0.75549	0.97158	1.14351	0.89165	1.19117	1.50565
10.1272	0.03634	0.04879	0.06298	0.7564	0.9743	1.14619	0.89295	1.19495	1.51204
10.1462	0.03621	0.0488	0.06298	0.76063	0.97111	1.13794	0.89816	1.19144	1.49939
10.1653	0.03635	0.04827	0.06268	0.76157	0.97689	1.13669	0.8995	1.19902	1.51352
10.1844	0.03626	0.04751	0.06219	0.76628	0.97292	1.13586	0.9053	1.19451	1.49819
10.2034	0.03641	0.04711	0.06189	0.76377	0.97286	1.13514	0.90256	1.19486	1.50178
10.2225	0.03673	0.04697	0.06168	0.76153	0.97292	1.13778	0.90014	1.19537	1.50536
10.2416	0.03734	0.04697	0.06189	0.76201	0.97447	1.1374	0.9009	1.19768	1.50929
10.2607	0.0369	0.04663	0.06183	0.76055	0.97666	1.13878	0.89936	1.20078	1.51726
10.2797	0.03701	0.04587	0.06175	0.75608	0.97036	1.14184	0.89435	1.19353	1.50767
10.2988	0.0373	0.04534	0.06233	0.75814	0.96864	1.1414	0.89702	1.19178	1.50128
10.3179	0.0376	0.04514	0.06246	0.75485	0.95641	1.13943	0.89338	1.17728	1.47536
10.337	0.03805	0.04484	0.06205	0.75144	0.95756	1.13431	0.88961	1.17912	1.4831
10.356	0.03829	0.04503	0.06204	0.7488	0.96129	1.14346	0.88669	1.18408	1.49634
10.3751	0.03869	0.04481	0.06191	0.74821	0.95947	1.15354	0.88618	1.18219	1.493
10.3942	0.03853	0.04483	0.06154	0.74831	0.95878	1.15798	0.88652	1.18173	1.4917
10.4133	0.03843	0.04473	0.0614	0.74837	0.95831	1.16428	0.88682	1.18153	1.49097
10.4323	0.03849	0.04485	0.06107	0.7491	0.95997	1.15874	0.88789	1.18398	1.49487
10.4514	0.03837	0.04501	0.06095	0.75008	0.96368	1.15343	0.88931	1.18892	1.50351
10.4705	0.03793	0.04483	0.06117	0.75347	0.96155	1.13995	0.89357	1.18667	1.49443
10.4895	0.03777	0.0448	0.06115	0.75258	0.95444	1.13074	0.89277	1.17837	1.47824
10.5086	0.03733	0.04419	0.06096	0.76107	0.94907	1.13391	0.90308	1.17222	1.45482
10.5277	0.03702	0.04418	0.0603	0.76018	0.94863	1.12922	0.90228	1.17209	1.45539
10.5468	0.03688	0.04446	0.06028	0.75799	0.9555	1.12585	0.89991	1.18105	1.47626
10.5658	0.03685	0.04432	0.06071	0.75973	0.95486	1.12656	0.90216	1.18061	1.47299
10.5849	0.0367	0.04416	0.06105	0.76405	0.96	1.11714	0.90751	1.18741	1.48131
10.604	0.03642	0.04379	0.06179	0.75983	0.96114	1.1177	0.90271	1.18921	1.49003
10.6231	0.03625	0.04365	0.06181	0.75574	0.96497	1.11639	0.8981	1.19436	1.50544
10.6421	0.03605	0.04369	0.06179	0.74753	0.96531	1.13801	0.8886	1.1952	1.51713
10.6612	0.03611	0.04348	0.06081	0.74724	0.97076	1.13721	0.8885	1.20243	1.53206
10.6803	0.03599	0.04307	0.05954	0.74662	0.97976	1.14052	0.888	1.21398	1.55626
10.6994	0.03647	0.04253	0.05919	0.74807	0.97636	1.13144	0.88996	1.21016	1.54637
10.7184	0.03643	0.04232	0.05866	0.7494	0.97122	1.12598	0.8918	1.20419	1.5322
10.7375	0.03636	0.04266	0.05838	0.75026	0.96992	1.1236	0.89308	1.2029	1.52821
10.7566	0.03652	0.04281	0.05849	0.7481	0.96576	1.12543	0.89077	1.19822	1.52104
10.7757	0.03678	0.04305	0.0579	0.74621	0.9651	1.12557	0.88875	1.19779	1.52228
10.7947	0.03634	0.04302	0.0579	0.74661	0.96244	1.12476	0.88944	1.1949	1.51563
10.8138	0.03578	0.0431	0.05782	0.74487	0.96387	1.12552	0.8876	1.19712	1.52212
10.8329	0.03501	0.04298	0.05931	0.75241	0.9656	1.12293	0.8968	1.19968	1.51769
10.8519	0.03481	0.04324	0.05923	0.75526	0.9667	1.1217	0.90043	1.20142	1.51747
10.871	0.03461	0.04375	0.05942	0.76047	0.96966	1.12089	0.90688	1.20557	1.5192
10.8901	0.0347	0.04354	0.05878	0.76323	0.97753	1.11968	0.9104	1.21573	1.53632
10.9092	0.03482	0.04311	0.05863	0.7621	0.97521	1.12275	0.90925	1.21325	1.53244
10.9282	0.03482	0.04298	0.0587	0.76115	0.97144	1.12651	0.90831	1.20894	1.5246
10.9473	0.03452	0.04256	0.05893	0.76318	0.97219	1.1101	0.91095	1.21031	1.52463
10.9664	0.03434	0.04222	0.05907	0.76723	0.97362	1.09984	0.91603	1.21246	1.52371
10.9855	0.03443	0.04178	0.05925	0.76978	0.98337	1.10581	0.91938	1.22503	1.54595
11.0045	0.0343	0.04167	0.05935	0.76774	0.98491	1.1011	0.9172	1.22732	1.55295
11.0236	0.03483	0.04179	0.05946	0.76818	0.98917	1.11199	0.91793	1.23304	1.56391
11.0427	0.03505	0.04226	0.05963	0.76755	0.99296	1.12008	0.91741	1.23823	1.57509
11.0618	0.03525	0.0429	0.05953	0.76476	0.99639	1.11408	0.91428	1.24291	1.58797
11.0808	0.03541	0.04379	0.05937	0.76757	0.99829	1.11564	0.91787	1.24569	1.5899
11.0999	0.03539	0.04381	0.05956	0.76387	0.99889	1.12437	0.9137	1.24679	1.59654
11.119	0.03547	0.04371	0.05989	0.76779	0.99723	1.1253	0.91866	1.24511	1.58789
11.138	0.0357	0.04369	0.05919	0.76738	0.98352	1.12969	0.91843	1.22856	1.55421
11.1571	0.0359	0.04367	0.05846	0.76474	0.98291	1.12751	0.91557	1.22825	1.55657
11.1762	0.03592	0.0441	0.0584	0.76047	0.9765	1.12887	0.91074	1.22064	1.54602
11.1953	0.0357	0.0442	0.05762	0.7637	0.97289	1.13065	0.91481	1.21645	1.53318
11.2143	0.03584	0.04439	0.05805	0.76355	0.97467	1.13167	0.91484	1.21905	1.53847
11.2334	0.03606	0.04442	0.0587	0.76445	0.97205	1.131	0.91611	1.21618	1.53125
11.2525	0.0361	0.04452	0.05875	0.76701	0.96421	1.13479	0.91942	1.2069	1.50875
11.2716	0.03628	0.04455	0.05936	0.76538	0.95838	1.13061	0.91773	1.20005	1.49649
11.2906	0.0359	0.04457	0.06028	0.76442	0.95852	1.13308	0.91683	1.20059	1.49854
11.3097	0.03603	0.04454	0.06021	0.76043	0.9658	1.13428	0.91229	1.21013	1.52287
11.3288	0.03591	0.04393	0.06018	0.75936	0.97355	1.1367	0.91125	1.22028	1.54476
11.3479	0.03563	0.04377	0.05988	0.76101	0.96495	1.14637	0.91344	1.20999	1.52137
11.3669	0.03532	0.04341	0.05969	0.76367	0.97673	1.14996	0.91688	1.22523	1.549
11.386	0.03555	0.0434	0.05954	0.76249	0.97999	1.14896	0.91569	1.22969	1.55939
11.4051	0.03559	0.04374	0.05933	0.76515	0.97645	1.1602	0.91911	1.22562	1.54746
11.4242	0.03569	0.04369	0.0589	0.75785	0.97101	1.16329	0.91061	1.21918	1.54317
11.4432	0.03577	0.04311	0.0591	0.75649	0.96886	1.1632	0.90921	1.21695	1.54008
11.4623	0.03552	0.04251	0.05867	0.75324	0.95898	1.16031	0.90557	1.2051	1.5196
11.4814	0.03524	0.0424	0.0586	0.75145	0.95482	1.15929	0.90367	1.20034	1.51186
11.5004	0.0348	0.0427	0.05823	0.75208	0.96072	1.16533	0.90467	1.20817	1.52685
11.5195	0.03463	0.04304	0.05797	0.75148	0.96878	1.16706	0.90421	1.21874	1.549
11.5386	0.03479	0.04245	0.05855	0.74757	0.96391	1.17065	0.89975	1.21306	1.54203
11.5577	0.03499	0.0429	0.05897	0.74352	0.96854	1.17396	0.8951	1.21934	1.5598
11.5767	0.03486	0.04307	0.05908	0.7435	0.96451	1.17519	0.8953	1.2148	1.55027
11.5958	0.03498	0.04295	0.05992	0.75128	0.96541	1.17307	0.90488	1.21633	1.54336
11.6149	0.0344	0.0426	0.05986	0.75559	0.96726	1.16777	0.91029	1.21917	1.54349
11.634	0.03422	0.04194	0.05943	0.75897	0.96314	1.15593	0.91464	1.21446	1.52926
11.653	0.03402	0.04058	0.05917	0.76085	0.96458	1.15827	0.91714	1.21667	1.53118
11.6721	0.03387	0.0397	0.05935	0.75457	0.96257	1.15478	0.90981	1.21448	1.53437
11.6912	0.03381	0.03968	0.06008	0.75282	0.96107	1.14139	0.90794	1.21294	1.53319
11.7103	0.0336	0.03993	0.06041	0.74539	0.96201	1.15827	0.89922	1.21447	1.54549
11.7293	0.03326	0.0396	0.06051	0.74223	0.96363	1.15461	0.89563	1.21686	1.55416
11.7484	0.03302	0.03968	0.06079	0.74033	0.97338	1.15496	0.89353	1.22964	1.58257
11.7675	0.0331	0.03924	0.06116	0.73906	0.9738	1.1501	0.89221	1.23063	1.58597
11.7865	0.0336	0.03913	0.06135	0.74016	0.98676	1.15646	0.89377	1.24755	1.61901
11.8056	0.03379	0.03924	0.06117	0.74342	0.98557	1.16096	0.89794	1.24649	1.61248
11.8247	0.0338	0.03907	0.05982	0.7456	0.98519	1.14239	0.90081	1.24638	1.60924
11.8438	0.03369	0.03935	0.05932	0.74181	0.98843	1.13647	0.89647	1.2509	1.62305
11.8628	0.03323	0.03958	0.05861	0.74063	0.98594	1.1377	0.89528	1.24813	1.61862
11.8819	0.03309	0.03978	0.05751	0.73686	0.98556	1.1347	0.89093	1.24805	1.62302
11.901	0.03263	0.04	0.05841	0.73548	0.97881	1.15029	0.88946	1.23996	1.60799
11.9201	0.03236	0.04011	0.05813	0.73443	0.97183	1.14725	0.88841	1.23152	1.59178
11.9391	0.03226	0.0405	0.05789	0.73804	0.97066	1.13711	0.89301	1.23034	1.58453
11.9582	0.03224	0.04032	0.0574	0.73198	0.95777	1.14832	0.88591	1.21437	1.55925
11.9773	0.03234	0.04081	0.05753	0.73171	0.95629	1.14862	0.88581	1.21291	1.55637
11.9964	0.03252	0.041	0.05758	0.72883	0.95839	1.14282	0.8826	1.21596	1.566
12.0154	0.03254	0.04135	0.05618	0.72929	0.96094	1.13926	0.88339	1.21958	1.57259
12.0345	0.03227	0.0423	0.05545	0.72856	0.96129	1.14001	0.88273	1.22039	1.57493
12.0536	0.03221	0.04261	0.05535	0.72498	0.95759	1.14125	0.87864	1.216	1.57023
12.0726	0.03203	0.04283	0.05511	0.72231	0.9546	1.14617	0.87561	1.21258	1.5664
12.0917	0.03204	0.04264	0.056	0.72243	0.94707	1.14152	0.87599	1.2035	1.54738
12.1108	0.03203	0.04244	0.0557	0.72636	0.94405	1.13791	0.88099	1.20017	1.53531
12.1299	0.0321	0.04267	0.05458	0.72839	0.94231	1.13435	0.8837	1.1983	1.52863
12.1489	0.03153	0.04229	0.05465	0.72887	0.94805	1.13357	0.8845	1.20601	1.5436
12.168	0.03128	0.04227	0.05431	0.7243	0.94392	1.12729	0.87919	1.20118	1.53926
12.1871	0.03091	0.04234	0.05382	0.71954	0.94585	1.12756	0.87368	1.20408	1.551
12.2062	0.03087	0.04245	0.05368	0.71997	0.94237	1.12619	0.87446	1.20011	1.54204
12.2252	0.03088	0.04261	0.05388	0.7206	0.93932	1.12639	0.87549	1.1966	1.53377
12.2443	0.0308	0.04275	0.05372	0.72202	0.9421	1.13052	0.87747	1.20056	1.53981
12.2634	0.03078	0.04285	0.0535	0.72611	0.9544	1.13258	0.88266	1.21671	1.56745
12.2825	0.03085	0.04245	0.05247	0.73003	0.96092	1.1338	0.88766	1.22549	1.58022
12.3015	0.03104	0.04221	0.05165	0.72907	0.96209	1.11447	0.88668	1.22746	1.58527
12.3206	0.03106	0.04218	0.0513	0.73201	0.95838	1.11244	0.89049	1.22314	1.57243
12.3397	0.03099	0.04273	0.05134	0.73641	0.94608	1.11183	0.8961	1.20782	1.53512
12.3588	0.03064	0.04259	0.05106	0.73769	0.9426	1.11614	0.89793	1.20366	1.52468
12.3778	0.03032	0.04267	0.05099	0.73697	0.93462	1.10583	0.89736	1.19397	1.50541
12.3969	0.03023	0.04218	0.05056	0.73498	0.93419	1.09914	0.89522	1.19395	1.50761
12.416	0.03016	0.04192	0.05043	0.73279	0.93237	1.09532	0.89281	1.19207	1.5063
12.435	0.03013	0.04204	0.0506	0.73472	0.93804	1.10184	0.89538	1.19986	1.51956
12.4541	0.03018	0.04269	0.05068	0.74166	0.94112	1.10454	0.90405	1.20421	1.51937
12.4732	0.0303	0.04299	0.05062	0.74101	0.93916	1.1045	0.90345	1.20207	1.51562
12.4923	0.03026	0.04281	0.04948	0.74169	0.93607	1.0879	0.90451	1.19852	1.50723
12.5113	0.03039	0.04236	0.04929	0.74022	0.93671	1.08554	0.90296	1.19975	1.51138
12.5304	0.03042	0.04175	0.04934	0.73537	0.94559	1.08157	0.89733	1.21158	1.54154
12.5495	0.03015	0.04165	0.04973	0.74007	0.95702	1.06719	0.90328	1.22664	1.56617
12.5686	0.02975	0.04108	0.04942	0.74032	0.954	1.07224	0.90379	1.22314	1.55846
12.5876	0.0294	0.04033	0.04938	0.73933	0.9547	1.06271	0.90279	1.22446	1.56221
12.6067	0.02921	0.03963	0.04961	0.74139	0.95233	1.06478	0.90554	1.22181	1.55389
12.6258	0.02934	0.03908	0.05045	0.74123	0.94937	1.06134	0.90558	1.21845	1.54697
12.6449	0.02988	0.03906	0.05085	0.7431	0.95158	1.05776	0.90812	1.22171	1.55097
12.6639	0.02987	0.03883	0.05108	0.74328	0.9515	1.0548	0.90858	1.22198	1.55106
12.683	0.02977	0.03855	0.05051	0.7412	0.9497	1.05413	0.90627	1.22001	1.54944
12.7021	0.02946	0.03829	0.05073	0.74031	0.94325	1.06282	0.90541	1.21214	1.53421
12.7211	0.02904	0.0383	0.05082	0.74126	0.94548	1.07433	0.90679	1.21543	1.53951
12.7402	0.02933	0.03858	0.05	0.74143	0.94519	1.07913	0.90722	1.21571	1.53962
12.7593	0.02953	0.03839	0.05006	0.74276	0.94206	1.07356	0.90909	1.21211	1.53027
12.7784	0.02967	0.03835	0.04942	0.74131	0.93743	1.07251	0.90759	1.20653	1.52041
12.7974	0.02981	0.03805	0.04967	0.73526	0.93487	1.0821	0.90044	1.2036	1.52191
12.8165	0.02969	0.0376	0.04969	0.73187	0.94639	1.09562	0.89655	1.21886	1.55728
12.8356	0.02966	0.0374	0.04962	0.7294	0.94201	1.1012	0.89376	1.21374	1.54973
12.8547	0.02957	0.03719	0.04954	0.73277	0.92856	1.09804	0.89813	1.19697	1.51075
12.8737	0.02945	0.03723	0.04953	0.72683	0.9217	1.09813	0.89114	1.18856	1.50086
12.8928	0.02951	0.03709	0.0501	0.72961	0.91776	1.0991	0.89478	1.18385	1.48738
12.9119	0.0296	0.03709	0.05119	0.73009	0.92117	1.11051	0.89564	1.18863	1.49626
12.931	0.02949	0.03663	0.05191	0.72488	0.92604	1.1138	0.88949	1.19531	1.51642
12.95	0.02941	0.03626	0.05158	0.72434	0.93294	1.11529	0.88904	1.20468	1.53609
12.9691	0.02921	0.03592	0.05145	0.72328	0.92802	1.11697	0.88793	1.19876	1.52513
12.9882	0.02889	0.03589	0.05185	0.72203	0.92298	1.13304	0.8866	1.19264	1.51398
13.0072	0.02877	0.0364	0.05253	0.72187	0.92477	1.13552	0.88661	1.19531	1.51945
13.0263	0.02865	0.03595	0.05265	0.71933	0.91647	1.12928	0.88374	1.18509	1.5015
13.0454	0.02886	0.03476	0.0522	0.71145	0.91304	1.136	0.87434	1.18102	1.50303
13.0645	0.02856	0.03396	0.0521	0.7137	0.91899	1.13871	0.87731	1.1891	1.51648
13.0835	0.0286	0.03362	0.05225	0.71885	0.92821	1.14003	0.88388	1.2015	1.535
13.1026	0.02857	0.03393	0.05317	0.71696	0.92655	1.14354	0.8818	1.19974	1.53358
13.1217	0.0284	0.03436	0.0535	0.71708	0.92097	1.16002	0.8822	1.19295	1.51924
13.1408	0.02856	0.03479	0.05366	0.7163	0.91424	1.15597	0.88152	1.18467	1.50298
13.1598	0.02865	0.03457	0.05358	0.71535	0.91444	1.1553	0.88059	1.18532	1.50529
13.1789	0.02864	0.03459	0.05407	0.71368	0.9125	1.15549	0.87875	1.18321	1.5029
13.198	0.02854	0.03496	0.05398	0.71003	0.9149	1.15347	0.87448	1.18669	1.51451
13.2171	0.02824	0.03507	0.05337	0.71168	0.91531	1.15984	0.87671	1.18754	1.51392
13.2361	0.02752	0.03496	0.05372	0.70838	0.9129	1.18325	0.87284	1.18476	1.51228
13.2552	0.02754	0.03532	0.05382	0.71213	0.92044	1.18387	0.87769	1.19498	1.52813
13.2743	0.02782	0.03557	0.05355	0.71355	0.92003	1.18216	0.87969	1.19484	1.52575
13.2934	0.02772	0.03543	0.05344	0.70931	0.91915	1.17737	0.87473	1.1941	1.52944
13.3124	0.02761	0.03531	0.05393	0.7089	0.92131	1.16496	0.87448	1.19727	1.5362
13.3315	0.02734	0.03537	0.0536	0.71292	0.9091	1.16136	0.87969	1.18178	1.49897
13.3506	0.02715	0.03564	0.05335	0.71416	0.90745	1.1761	0.88144	1.17995	1.49339
13.3696	0.027	0.03579	0.05302	0.71734	0.91507	1.17579	0.88559	1.19029	1.51023
13.3887	0.02678	0.0361	0.05277	0.71899	0.91329	1.15819	0.88785	1.18843	1.50404
13.4078	0.02695	0.03627	0.05336	0.716	0.9014	1.14465	0.88439	1.17346	1.47699
13.4269	0.02686	0.03616	0.05496	0.71489	0.89794	1.1351	0.88323	1.16932	1.46973
13.4459	0.02705	0.03638	0.05515	0.7169	0.8981	1.14368	0.886	1.16985	1.46789
13.465	0.02708	0.03606	0.0551	0.71961	0.8962	1.15455	0.88958	1.16767	1.45967
13.4841	0.02671	0.03583	0.05465	0.71808	0.89592	1.16711	0.88793	1.16767	1.4614
13.5032	0.02658	0.03598	0.05354	0.71499	0.89731	1.16004	0.88434	1.16998	1.46991
13.5222	0.02677	0.03562	0.05286	0.71728	0.89542	1.16653	0.88738	1.16797	1.46259
13.5413	0.02693	0.03568	0.05341	0.71792	0.89256	1.1678	0.88842	1.16464	1.45466
13.5604	0.02715	0.03605	0.05314	0.72156	0.89163	1.18144	0.89318	1.16373	1.44781
13.5795	0.02726	0.03584	0.05211	0.72063	0.89224	1.17315	0.89225	1.16487	1.45112
13.5985	0.02714	0.03521	0.0516	0.72263	0.8942	1.16857	0.89494	1.16788	1.45446
13.6176	0.02723	0.03524	0.05151	0.72625	0.88613	1.17133	0.89963	1.15786	1.429
13.6367	0.02745	0.0356	0.05243	0.72573	0.88851	1.1687	0.8992	1.16143	1.43678
13.6557	0.02762	0.03581	0.05326	0.72328	0.89459	1.17887	0.89639	1.16985	1.45699
13.6748	0.02752	0.03601	0.05377	0.7184	0.8839	1.18327	0.89062	1.15622	1.43511
13.6939	0.02729	0.03572	0.05298	0.72097	0.88548	1.18434	0.89402	1.15863	1.43647
13.713	0.02733	0.03513	0.05321	0.7209	0.8816	1.1714	0.89415	1.15396	1.42676
13.732	0.02734	0.03475	0.0533	0.71634	0.88489	1.18819	0.88871	1.15877	1.44234
13.7511	0.02762	0.03484	0.05407	0.7189	0.89001	1.19921	0.8921	1.1659	1.45339
13.7702	0.02764	0.03502	0.05365	0.72106	0.8914	1.20223	0.89501	1.1681	1.45485
13.7893	0.02783	0.03505	0.05325	0.72021	0.89318	1.20365	0.89418	1.17082	1.46129
13.8083	0.02814	0.03415	0.05336	0.71927	0.89701	1.20728	0.89327	1.17632	1.47353
13.8274	0.02819	0.034	0.05317	0.72084	0.8999	1.19276	0.89547	1.18056	1.47992
13.8465	0.02803	0.03418	0.05369	0.72302	0.89381	1.18812	0.89841	1.17302	1.46135
13.8656	0.02763	0.03404	0.05403	0.72285	0.90954	1.18454	0.8984	1.19405	1.50449
13.8846	0.02766	0.03448	0.05433	0.72165	0.91724	1.18723	0.8971	1.20452	1.52731
13.9037	0.02769	0.03424	0.05442	0.72136	0.9144	1.187	0.89697	1.20123	1.52071
13.9228	0.02756	0.03391	0.05683	0.71817	0.91566	1.18112	0.89329	1.20334	1.52889
13.9419	0.02764	0.03373	0.05886	0.71689	0.91878	1.17467	0.89196	1.2079	1.53964
13.9609	0.02772	0.03358	0.05974	0.71314	0.91288	1.17717	0.88756	1.20061	1.52931
13.98	0.02762	0.0337	0.05992	0.71143	0.91963	1.18415	0.88566	1.20986	1.55026
13.9991	0.02739	0.03384	0.05962	0.71348	0.92391	1.18289	0.88844	1.21585	1.55964
14.0181	0.02731	0.03384	0.05836	0.71344	0.93129	1.17965	0.88862	1.22598	1.58021
14.0372	0.02732	0.03346	0.05799	0.70892	0.92836	1.17787	0.8833	1.22255	1.57877
14.0563	0.02728	0.03431	0.05793	0.71024	0.93239	1.17641	0.88518	1.22831	1.58858
14.0754	0.02728	0.03496	0.05836	0.70808	0.93175	1.16168	0.88269	1.22789	1.59035
14.0944	0.02723	0.03493	0.05836	0.71311	0.92875	1.15901	0.88919	1.22442	1.57641
14.1135	0.02696	0.03479	0.05789	0.7126	0.9356	1.14916	0.88882	1.23389	1.59621
14.1326	0.02677	0.03458	0.05754	0.70822	0.93405	1.15345	0.88361	1.23222	1.59827
14.1517	0.02645	0.03413	0.05781	0.70254	0.93616	1.15265	0.87676	1.23539	1.61197
14.1707	0.02628	0.03467	0.05827	0.70147	0.93524	1.14543	0.87562	1.23459	1.61151
14.1898	0.02642	0.03539	0.05808	0.70004	0.9305	1.14723	0.87407	1.22877	1.6012
14.2089	0.0264	0.03603	0.05771	0.70019	0.93184	1.14992	0.87454	1.23089	1.60507
14.228	0.02613	0.03577	0.0576	0.70171	0.93757	1.14666	0.87671	1.23888	1.61916
14.247	0.02617	0.03577	0.05753	0.7059	0.92428	1.13366	0.88217	1.2218	1.5784
14.2661	0.02611	0.03545	0.05672	0.71051	0.93712	1.12913	0.88817	1.23921	1.6078
14.2852	0.02634	0.03524	0.05653	0.71125	0.94019	1.12992	0.88931	1.24372	1.61585
14.3042	0.02626	0.03563	0.05599	0.71477	0.94131	1.13278	0.89395	1.24558	1.61479
14.3233	0.02591	0.03571	0.05633	0.71621	0.93457	1.11538	0.89597	1.2371	1.59528
14.3424	0.02551	0.03601	0.05673	0.71468	0.94269	1.10119	0.8943	1.24835	1.62011
14.3615	0.02549	0.03584	0.05681	0.71593	0.93703	1.10042	0.89612	1.24127	1.60368
14.3805	0.02554	0.03549	0.05713	0.71761	0.94052	1.09596	0.89842	1.2464	1.61177
14.3996	0.02559	0.03553	0.05732	0.72169	0.9371	1.09167	0.90377	1.24229	1.59773
14.4187	0.02562	0.03578	0.05719	0.72083	0.93738	1.08532	0.90295	1.24305	1.60015
14.4378	0.02581	0.03517	0.05692	0.71377	0.93656	1.0872	0.89439	1.24235	1.60771
14.4568	0.0261	0.03559	0.05732	0.71415	0.93199	1.08971	0.89514	1.23687	1.59568
14.4759	0.02627	0.03548	0.05776	0.71437	0.92385	1.08046	0.89564	1.22653	1.57397
14.495	0.02651	0.03542	0.05756	0.71201	0.92224	1.08045	0.8929	1.22484	1.57339
14.5141	0.02655	0.0352	0.05525	0.71015	0.92716	1.08401	0.89077	1.23183	1.58994
14.5331	0.02642	0.03567	0.0532	0.70933	0.93042	1.07681	0.88993	1.23656	1.60053
14.5522	0.02633	0.03552	0.05247	0.70801	0.92736	1.08405	0.88846	1.23284	1.59444
14.5713	0.02634	0.03572	0.05194	0.71242	0.92044	1.07817	0.89423	1.22408	1.57043
14.5903	0.02649	0.03556	0.05166	0.70906	0.91398	1.07934	0.89027	1.21594	1.5579
14.6094	0.02641	0.03563	0.05135	0.71021	0.90504	1.08198	0.89196	1.20455	1.53276
14.6285	0.02601	0.03578	0.05153	0.70791	0.9094	1.07292	0.88935	1.21079	1.5483
14.6476	0.02591	0.03586	0.05178	0.70427	0.90741	1.08272	0.88502	1.20855	1.54826
14.6666	0.02584	0.03553	0.05142	0.70624	0.91091	1.09223	0.88771	1.21359	1.55576
14.6857	0.02572	0.03534	0.05153	0.70623	0.91471	1.08839	0.88795	1.21904	1.56668
14.7048	0.02573	0.03539	0.05184	0.70318	0.90381	1.08811	0.88432	1.20495	1.54162
14.7239	0.02575	0.03555	0.05134	0.70412	0.90458	1.08627	0.88569	1.20646	1.54326
14.7429	0.02581	0.0355	0.05151	0.70312	0.91347	1.06946	0.88462	1.21883	1.56974
14.762	0.02599	0.03509	0.05111	0.70902	0.91676	1.0724	0.89228	1.22361	1.5715
14.7811	0.02561	0.03434	0.05111	0.70825	0.91536	1.07194	0.89157	1.22205	1.56906
14.8002	0.02548	0.03347	0.05113	0.70562	0.9144	1.07502	0.88851	1.22113	1.57038
14.8192	0.02525	0.03352	0.05032	0.70706	0.90883	1.07151	0.89057	1.2142	1.55402
14.8383	0.0251	0.03334	0.05043	0.7033	0.9114	1.07063	0.88607	1.21809	1.56671
14.8574	0.02521	0.03359	0.05082	0.69917	0.90854	1.07237	0.88115	1.21491	1.56536
14.8765	0.02535	0.03395	0.05059	0.69647	0.90532	1.06706	0.878	1.21104	1.56073
14.8955	0.02529	0.03357	0.05028	0.69295	0.90708	1.0671	0.87382	1.21373	1.57065
14.9146	0.0254	0.03349	0.04955	0.69768	0.90645	1.0702	0.88003	1.21318	1.563
14.9337	0.02541	0.03349	0.04809	0.69729	0.89521	1.06635	0.87977	1.19862	1.53341
14.9527	0.02566	0.0336	0.04783	0.69564	0.90124	1.06201	0.87793	1.20711	1.55274
14.9718	0.0254	0.03363	0.04749	0.69375	0.89774	1.06691	0.87576	1.20297	1.54654
14.9909	0.02502	0.03367	0.04723	0.68883	0.90213	1.06562	0.86977	1.20933	1.56585
15.01	0.02492	0.03349	0.0467	0.68669	0.90189	1.0669	0.86726	1.20938	1.56861
15.029	0.02468	0.03347	0.04601	0.69074	0.9006	1.06511	0.87259	1.20801	1.56019
15.0481	0.02446	0.03311	0.04545	0.68883	0.89063	1.07166	0.87043	1.19508	1.53597
15.0672	0.02428	0.03298	0.04457	0.68775	0.89153	1.07153	0.86929	1.19666	1.5404
15.0863	0.02407	0.03337	0.04438	0.6909	0.89137	1.08474	0.87351	1.19682	1.53629
15.1053	0.02426	0.03379	0.04441	0.69311	0.88872	1.08181	0.87655	1.19369	1.52669
15.1244	0.02421	0.03354	0.04404	0.69633	0.88563	1.08585	0.88087	1.18997	1.51452
15.1435	0.02411	0.0338	0.04363	0.69436	0.88525	1.0767	0.87863	1.18977	1.51648
15.1626	0.02399	0.0334	0.04366	0.69241	0.89213	1.09098	0.87641	1.19942	1.53858
15.1816	0.02373	0.03353	0.0433	0.69208	0.89583	1.08798	0.8762	1.20476	1.54974
15.2007	0.02366	0.03376	0.04323	0.69052	0.89903	1.09813	0.87444	1.20949	1.5613
15.2198	0.02375	0.0341	0.04309	0.69017	0.89854	1.09788	0.87423	1.20929	1.56111
15.2388	0.02351	0.03382	0.04355	0.69347	0.90131	1.08014	0.87865	1.21346	1.56502
15.2579	0.02327	0.03418	0.04357	0.69384	0.90215	1.08151	0.87938	1.21499	1.56739
15.277	0.02325	0.03431	0.04407	0.68915	0.89802	1.08205	0.87371	1.20987	1.56284
15.2961	0.02322	0.03435	0.04359	0.69192	0.9015	1.08296	0.87747	1.21489	1.56919
15.3151	0.02328	0.03435	0.04371	0.69791	0.90184	1.07294	0.88532	1.21572	1.56265
15.3342	0.02307	0.03439	0.04341	0.69982	0.8906	1.08661	0.88798	1.20104	1.52975
15.3533	0.02293	0.03473	0.04432	0.6953	0.88714	1.08425	0.88252	1.19683	1.52686
15.3724	0.02295	0.03495	0.04435	0.6952	0.88976	1.08136	0.88262	1.20073	1.53475
15.3914	0.02297	0.035	0.04478	0.69219	0.8887	1.07011	0.87903	1.19964	1.53629
15.4105	0.02301	0.03485	0.04459	0.6899	0.88552	1.06753	0.87635	1.19575	1.53111
15.4296	0.02305	0.03505	0.04369	0.68977	0.88608	1.08101	0.87639	1.1969	1.53343
15.4487	0.02292	0.03552	0.04394	0.69139	0.88095	1.08084	0.87869	1.19044	1.51779
15.4677	0.0225	0.03607	0.04431	0.69436	0.88275	1.08413	0.88269	1.19331	1.51946
15.4868	0.0225	0.03692	0.04482	0.69521	0.88313	1.07656	0.88403	1.1942	1.51989
15.5059	0.02271	0.03731	0.04465	0.69009	0.88543	1.07409	0.87778	1.19768	1.53358
15.525	0.02268	0.03702	0.04537	0.6891	0.88018	1.07705	0.87674	1.19095	1.52088
15.544	0.02236	0.03689	0.04536	0.69154	0.87483	1.08819	0.88011	1.18411	1.50332
15.5631	0.02238	0.03695	0.04553	0.69115	0.86846	1.09794	0.87986	1.17586	1.48666
15.5822	0.02233	0.037	0.04533	0.69347	0.86433	1.09254	0.88309	1.17067	1.47263
15.6012	0.02233	0.03691	0.04528	0.69496	0.86527	1.08891	0.88523	1.17235	1.47382
15.6203	0.02238	0.03695	0.0458	0.6959	0.86355	1.10383	0.88668	1.1704	1.4683
15.6394	0.02247	0.03682	0.04556	0.69498	0.86611	1.10433	0.88568	1.17429	1.47733
15.6585	0.02258	0.03695	0.04565	0.69864	0.86799	1.10562	0.89054	1.17733	1.47846
15.6775	0.0226	0.0372	0.04534	0.69712	0.86646	1.09198	0.88885	1.17567	1.47683
15.6966	0.02234	0.03746	0.04555	0.69479	0.86131	1.09368	0.88612	1.16908	1.4662
15.7157	0.02225	0.03755	0.04587	0.69015	0.86545	1.08765	0.88045	1.17511	1.48451
15.7348	0.0223	0.03749	0.04629	0.69033	0.86578	1.08773	0.88088	1.17596	1.48579
15.7538	0.02224	0.0372	0.04675	0.68678	0.85957	1.07316	0.87655	1.16802	1.47406
15.7729	0.02236	0.03701	0.04688	0.69064	0.85429	1.08892	0.88171	1.16124	1.45475
15.792	0.02251	0.03684	0.04712	0.68859	0.85343	1.07537	0.87931	1.16045	1.45565
15.8111	0.02282	0.03643	0.048	0.69027	0.85418	1.0747	0.88172	1.16182	1.45593
15.8301	0.02307	0.0363	0.04769	0.6862	0.85354	1.07084	0.87678	1.16139	1.46023
15.8492	0.02351	0.03593	0.04726	0.68645	0.8568	1.06438	0.87734	1.16641	1.46993
15.8683	0.02363	0.03558	0.04646	0.68584	0.85324	1.06374	0.8768	1.16207	1.46161
15.8873	0.02355	0.03527	0.04669	0.68366	0.85387	1.07094	0.87424	1.1634	1.46701
15.9064	0.02331	0.03542	0.04675	0.67762	0.85151	1.08148	0.86677	1.16055	1.46902
15.9255	0.02334	0.03545	0.04691	0.67799	0.84926	1.06826	0.86747	1.1578	1.46264
15.9446	0.02322	0.0352	0.04594	0.68005	0.85476	1.06815	0.87035	1.16569	1.47581
15.9636	0.0234	0.03487	0.0461	0.68153	0.85719	1.06772	0.87247	1.1695	1.48138
15.9827	0.02321	0.0348	0.0452	0.68101	0.8619	1.0699	0.872	1.17643	1.49609
16.0018	0.02314	0.03488	0.04521	0.67853	0.86216	1.07439	0.86905	1.17722	1.5008
16.0209	0.02286	0.03471	0.04506	0.67894	0.85914	1.05826	0.86979	1.17341	1.49222
16.0399	0.02283	0.03423	0.04465	0.67638	0.85984	1.06847	0.86677	1.17467	1.49796
16.059	0.02279	0.03317	0.04432	0.67665	0.86143	1.06466	0.86739	1.17726	1.50262
16.0781	0.02267	0.03248	0.04441	0.67621	0.86803	1.06747	0.8671	1.18685	1.52259
16.0972	0.02237	0.03212	0.04478	0.67614	0.86928	1.06647	0.86725	1.18909	1.52703
16.1162	0.02242	0.03208	0.0441	0.67593	0.881	1.063	0.86719	1.2056	1.56093
16.1353	0.02248	0.03233	0.04389	0.67101	0.88103	1.06372	0.86106	1.20599	1.56816
16.1544	0.02247	0.03226	0.04375	0.67255	0.8817	1.04849	0.86321	1.2072	1.56839
16.1734	0.02241	0.03209	0.04387	0.67175	0.88697	1.05392	0.8624	1.2148	1.58482
16.1925	0.02222	0.03189	0.04436	0.6763	0.88725	1.05332	0.86848	1.21566	1.58019
16.2116	0.02218	0.03188	0.0439	0.67338	0.88709	1.04769	0.86501	1.21585	1.58424
16.2307	0.02206	0.03225	0.04449	0.67655	0.89066	1.05075	0.86935	1.22125	1.59074
16.2497	0.02211	0.03239	0.0443	0.67876	0.88603	1.04785	0.87246	1.21527	1.57522
16.2688	0.02212	0.03225	0.04419	0.67816	0.89315	1.05056	0.87192	1.22538	1.59652
16.2879	0.02216	0.03161	0.04377	0.67594	0.89576	1.04742	0.86928	1.22936	1.60744
16.307	0.02228	0.03149	0.04351	0.68086	0.88814	1.04529	0.87585	1.21938	1.58009
16.326	0.02221	0.03127	0.04377	0.68685	0.89822	1.04147	0.8838	1.23366	1.60101
16.3451	0.02236	0.03136	0.04319	0.69013	0.89626	1.03857	0.88826	1.23135	1.59158
16.3642	0.02227	0.03164	0.04333	0.68585	0.90662	1.02596	0.88299	1.24597	1.6271
16.3833	0.02217	0.03153	0.04297	0.68955	0.90528	1.03135	0.88796	1.24452	1.61891
16.4023	0.02174	0.03122	0.04236	0.68662	0.90048	1.03128	0.88442	1.23832	1.60992
16.4214	0.02165	0.03096	0.0424	0.68492	0.89866	1.04224	0.88245	1.23626	1.60776
16.4405	0.02156	0.03063	0.04241	0.68323	0.89415	1.03712	0.88046	1.2305	1.59805
16.4596	0.02147	0.03111	0.04252	0.68222	0.89493	1.04689	0.87935	1.23196	1.6022
16.4786	0.02145	0.03133	0.04224	0.68249	0.90829	1.03572	0.87989	1.25081	1.64028
16.4977	0.02173	0.03092	0.04176	0.68476	0.91414	1.02137	0.88306	1.25929	1.65433
16.5168	0.02198	0.03111	0.04127	0.68352	0.91627	1.03122	0.88171	1.26259	1.66251
16.5358	0.02209	0.03086	0.04109	0.68208	0.9091	1.02611	0.88012	1.25315	1.64484
16.5549	0.02188	0.0313	0.0409	0.67925	0.90343	1.02654	0.8767	1.2457	1.63316
16.574	0.02206	0.03129	0.04136	0.68238	0.89984	1.02502	0.88095	1.24112	1.61931
16.5931	0.02203	0.03112	0.04142	0.68221	0.89998	1.03074	0.8809	1.24169	1.62053
16.6121	0.02203	0.03098	0.04203	0.68035	0.91488	1.03139	0.87869	1.26272	1.66596
16.6312	0.02204	0.03082	0.04172	0.67794	0.90846	1.01647	0.87578	1.25431	1.65177
16.6503	0.02208	0.03091	0.0422	0.67565	0.91206	1.02236	0.87308	1.25977	1.6658
16.6694	0.02219	0.03162	0.04163	0.67776	0.90335	1.02137	0.87606	1.24815	1.63884
16.6884	0.02229	0.03207	0.041	0.67934	0.90435	1.02148	0.87834	1.24998	1.6402
16.7075	0.0221	0.03222	0.04158	0.68351	0.89478	1.02201	0.88398	1.23726	1.6082
16.7266	0.02194	0.03182	0.04142	0.68516	0.897	1.02417	0.88635	1.24075	1.61287
16.7457	0.0218	0.0316	0.04134	0.68723	0.90058	1.0275	0.8893	1.24612	1.62078
16.7647	0.02196	0.03156	0.04133	0.68796	0.89128	1.03404	0.89049	1.23369	1.59406
16.7838	0.02209	0.03159	0.04203	0.68446	0.88558	1.03287	0.88618	1.22616	1.58314
16.8029	0.02203	0.03202	0.04232	0.68704	0.88572	1.02529	0.88975	1.22669	1.58048
16.8219	0.02185	0.03143	0.04213	0.68843	0.87821	1.01281	0.89178	1.21678	1.55804
16.841	0.02152	0.03137	0.04273	0.68896	0.87857	1.01061	0.89273	1.21771	1.55894
16.8601	0.02133	0.03094	0.0429	0.68719	0.87158	1.00712	0.89069	1.20849	1.54218
16.8792	0.02119	0.03093	0.04319	0.68856	0.86864	1.00715	0.89269	1.20477	1.53246
16.8982	0.02117	0.03042	0.04363	0.68724	0.8688	1.00803	0.89124	1.20532	1.53511
16.9173	0.0211	0.03033	0.04433	0.68171	0.86104	1.02156	0.8843	1.19501	1.52126
16.9364	0.02112	0.03048	0.04484	0.68229	0.86104	1.01992	0.88527	1.19546	1.52115
16.9555	0.02115	0.03008	0.04517	0.68531	0.85486	1.022	0.88942	1.18741	1.50029
16.9745	0.02112	0.02982	0.04507	0.68324	0.85888	1.01592	0.88695	1.19345	1.51528
16.9936	0.0213	0.02987	0.04474	0.68177	0.86112	1.01843	0.88526	1.19694	1.5242
17.0127	0.0214	0.02954	0.04425	0.68832	0.85962	1.00537	0.89396	1.19519	1.51149
17.0318	0.02138	0.02933	0.04432	0.6945	0.85434	1.01894	0.90222	1.18816	1.4884
17.0508	0.02122	0.02876	0.04432	0.69422	0.85464	1.00853	0.90209	1.18892	1.49009
17.0699	0.02115	0.0286	0.04444	0.69416	0.84152	1.014	0.90224	1.17126	1.45373
17.089	0.02102	0.0288	0.04466	0.69009	0.8386	1.01587	0.89717	1.16773	1.45182
17.108	0.02085	0.02881	0.04548	0.69461	0.83865	1.00785	0.90326	1.16821	1.4464
17.1271	0.02099	0.0289	0.04566	0.69321	0.84451	1.00857	0.90163	1.17672	1.46557
17.1462	0.02121	0.02863	0.04594	0.69329	0.84611	1.0063	0.90192	1.17927	1.4705
17.1653	0.02117	0.02885	0.04565	0.69192	0.84757	1.01457	0.90037	1.18167	1.47703
17.1843	0.02113	0.02908	0.04577	0.69095	0.85073	1.01338	0.89931	1.18652	1.48808
17.2034	0.02146	0.02928	0.04516	0.69285	0.8415	1.01564	0.90202	1.17423	1.46005
17.2225	0.02171	0.02928	0.04589	0.69394	0.84368	1.01564	0.90367	1.17768	1.46539
17.2416	0.02166	0.0294	0.04542	0.69178	0.83658	1.00822	0.90107	1.16824	1.44876
17.2606	0.02155	0.02866	0.04575	0.68882	0.83757	1.01188	0.89745	1.16998	1.45614
17.2797	0.02131	0.02817	0.0458	0.68575	0.8353	1.01584	0.89366	1.16719	1.45439
17.2988	0.02145	0.02797	0.04547	0.68337	0.83548	1.02333	0.89077	1.16779	1.45866
17.3179	0.02146	0.02838	0.04571	0.68347	0.83429	1.01158	0.89111	1.16653	1.45573
17.3369	0.02155	0.02878	0.04594	0.68086	0.82939	1.00907	0.8879	1.16008	1.44586
17.356	0.02149	0.02913	0.04638	0.67926	0.83641	0.9954	0.88606	1.17029	1.46873
17.3751	0.02136	0.02935	0.04577	0.6794	0.83695	0.99383	0.88649	1.17143	1.47062
17.3942	0.02138	0.0289	0.04542	0.67589	0.8446	0.98929	0.88221	1.18257	1.49795
17.4132	0.02137	0.02886	0.04483	0.67084	0.84836	0.99903	0.87589	1.18823	1.51618
17.4323	0.02137	0.02851	0.04421	0.66795	0.85012	1.00045	0.87237	1.19104	1.52565
17.4514	0.02146	0.02858	0.04437	0.67213	0.84871	1.00258	0.87803	1.18943	1.51639
17.4704	0.02153	0.02873	0.04443	0.67492	0.84778	1.01184	0.88188	1.18848	1.5104
17.4895	0.02158	0.02882	0.04437	0.67298	0.84957	1.02698	0.87962	1.19138	1.51873
17.5086	0.02159	0.02867	0.04318	0.67377	0.84828	1.02672	0.88089	1.19002	1.51461
17.5277	0.02145	0.02823	0.04283	0.67391	0.84723	1.03262	0.88133	1.1889	1.51186
17.5467	0.02132	0.02827	0.04238	0.67257	0.84715	1.0388	0.87981	1.1892	1.51405
17.5658	0.02119	0.0282	0.0426	0.67329	0.84248	1.03976	0.88094	1.18304	1.50025
17.5849	0.02086	0.02839	0.04261	0.67761	0.84292	1.03766	0.88683	1.18405	1.49612
17.604	0.02053	0.0285	0.04324	0.6766	0.84323	1.03819	0.88582	1.18488	1.49889
17.623	0.02044	0.02865	0.04311	0.67022	0.84763	1.0256	0.87775	1.19153	1.52101
17.6421	0.02073	0.02868	0.0432	0.67407	0.84978	1.03474	0.88305	1.19507	1.52269
17.6612	0.02098	0.02858	0.0437	0.67479	0.84637	1.03079	0.88423	1.19065	1.5124
17.6803	0.02087	0.02851	0.04456	0.67852	0.84722	1.02887	0.88934	1.19219	1.51019
17.6993	0.02071	0.02814	0.04477	0.67354	0.85647	1.02466	0.88304	1.20564	1.54438
17.7184	0.0205	0.02787	0.04511	0.67292	0.84964	1.02993	0.88243	1.19651	1.52629
17.7375	0.02029	0.02776	0.04523	0.67143	0.85374	1.03079	0.88069	1.20275	1.54092
17.7565	0.02031	0.02754	0.04535	0.67562	0.85288	1.02306	0.88645	1.20201	1.53335
17.7756	0.02042	0.02764	0.04542	0.68159	0.84963	1.01146	0.89455	1.19786	1.51634
17.7947	0.02019	0.02769	0.04558	0.68216	0.84267	1.0152	0.89554	1.1884	1.49591
17.8138	0.01977	0.02779	0.04511	0.68257	0.84259	1.01336	0.89627	1.18862	1.49559
17.8328	0.01982	0.02775	0.04573	0.68653	0.83993	1.01986	0.90167	1.18529	1.48309
17.8519	0.01985	0.02765	0.04564	0.6824	0.8422	1.01281	0.89647	1.18899	1.49615
17.871	0.02009	0.02795	0.04573	0.68262	0.84498	1.00856	0.89695	1.19345	1.50478
17.8901	0.02005	0.02863	0.0456	0.68011	0.84558	1.00225	0.89388	1.19471	1.51058
17.9091	0.02004	0.02822	0.04578	0.67722	0.84461	1.00069	0.89031	1.19372	1.5123
17.9282	0.01992	0.02809	0.04557	0.67802	0.8442	0.99854	0.8916	1.19349	1.51048
17.9473	0.02001	0.02775	0.04491	0.68001	0.84699	0.99791	0.89445	1.19793	1.51658
17.9664	0.02014	0.02742	0.0442	0.67863	0.84874	1.00379	0.89286	1.20079	1.52411
17.9854	0.02013	0.02723	0.0444	0.67755	0.83978	1.01396	0.89166	1.18855	1.5003
18.0045	0.02021	0.02734	0.04441	0.67845	0.83695	1.00537	0.89307	1.185	1.49153
18.0236	0.02052	0.02716	0.04476	0.67583	0.84056	1.00683	0.88986	1.19058	1.50633
18.0427	0.02042	0.02705	0.04434	0.67502	0.84308	1.0055	0.88904	1.19454	1.51532
18.0617	0.02043	0.02682	0.04406	0.67459	0.84442	1.01313	0.8887	1.19683	1.52037
18.0808	0.02033	0.02675	0.04375	0.67169	0.84126	0.99576	0.88508	1.19274	1.51579
18.0999	0.02025	0.02688	0.0437	0.67295	0.83882	0.98219	0.88693	1.18963	1.50746
18.1189	0.02033	0.02708	0.04352	0.67744	0.84156	0.97922	0.89312	1.19389	1.5097
18.138	0.02056	0.02747	0.04323	0.67494	0.84262	0.96871	0.89007	1.19585	1.51691
18.1571	0.0207	0.0276	0.04326	0.67963	0.84624	0.96784	0.89654	1.20143	1.52157
18.1762	0.02085	0.02728	0.04345	0.67516	0.84365	0.97867	0.8909	1.19821	1.52088
18.1952	0.02101	0.02714	0.04269	0.67147	0.84313	0.98546	0.88628	1.1979	1.52511
18.2143	0.02095	0.02725	0.04269	0.67258	0.84388	0.98227	0.88795	1.19937	1.52636
18.2334	0.02099	0.02736	0.04255	0.6731	0.83992	0.97826	0.88888	1.1941	1.51458
18.2525	0.02104	0.02749	0.04295	0.67443	0.83757	0.97861	0.89083	1.19111	1.50642
18.2715	0.02098	0.02746	0.04207	0.67548	0.83311	0.97896	0.89247	1.18528	1.49273
18.2906	0.02105	0.02748	0.04126	0.67466	0.8223	0.97966	0.89161	1.17042	1.46316
18.3097	0.02115	0.02768	0.04095	0.67619	0.82272	0.98542	0.89389	1.17142	1.46283
18.3288	0.02104	0.02773	0.04047	0.68294	0.82461	0.9869	0.90307	1.1746	1.45971
18.3478	0.02113	0.02775	0.04042	0.67855	0.82203	0.9832	0.89752	1.17131	1.4588
18.3669	0.02097	0.02737	0.04091	0.67645	0.82035	0.99555	0.89493	1.16933	1.45746
18.386	0.02096	0.02706	0.04108	0.68002	0.82005	0.99327	0.89988	1.16932	1.45224
18.405	0.02114	0.02691	0.04066	0.68068	0.81751	0.99268	0.90098	1.16617	1.44461
18.4241	0.02129	0.02667	0.04024	0.67781	0.81712	0.98569	0.89746	1.166	1.44797
18.4432	0.02144	0.02649	0.04012	0.67821	0.81129	1.0029	0.89822	1.15803	1.43083
18.4623	0.02147	0.026	0.04009	0.68035	0.80405	1.00301	0.90131	1.14808	1.40719
18.4813	0.02131	0.02509	0.04012	0.68102	0.80686	1.01048	0.90242	1.15252	1.41513
18.5004	0.02124	0.02483	0.04047	0.68452	0.80621	1.01077	0.90727	1.15203	1.40903
18.5195	0.02133	0.02464	0.04059	0.6858	0.80666	1.01108	0.90922	1.15309	1.40916
18.5386	0.02111	0.02449	0.04035	0.68465	0.79883	1.01691	0.90799	1.14239	1.3885
18.5576	0.02111	0.02448	0.04072	0.68544	0.80309	1.01194	0.90929	1.14888	1.40046
18.5767	0.02131	0.02441	0.04041	0.68938	0.80994	1.00503	0.91477	1.15906	1.41556
18.5958	0.02131	0.02413	0.04013	0.68853	0.81096	1.00273	0.91388	1.16088	1.42024
18.6149	0.02099	0.02407	0.03955	0.69149	0.80518	1.00951	0.91805	1.15302	1.39974
18.6339	0.02086	0.02393	0.04008	0.6874	0.81362	1.01059	0.91286	1.16554	1.43087
18.653	0.02081	0.02377	0.04001	0.68321	0.81608	0.99147	0.90751	1.16948	1.44454
18.6721	0.02078	0.02391	0.04027	0.6841	0.81624	1.00463	0.90888	1.17009	1.44437
18.6911	0.02096	0.02372	0.04028	0.6828	0.81644	1.0082	0.90739	1.17079	1.44735
18.7102	0.02103	0.02344	0.04026	0.67528	0.82346	1.00859	0.8977	1.18137	1.47922
18.7293	0.02087	0.02283	0.04059	0.67824	0.82636	1.01257	0.9019	1.186	1.48429
18.7484	0.02075	0.02294	0.04027	0.67093	0.82081	1.01515	0.89245	1.17846	1.47877
18.7674	0.02074	0.0233	0.03995	0.67162	0.82154	1.00734	0.89362	1.17986	1.48042
18.7865	0.02059	0.02351	0.0399	0.67095	0.81855	1.00259	0.89297	1.17594	1.47306
18.8056	0.0206	0.02336	0.04039	0.6689	0.81363	1.0062	0.89047	1.16929	1.46205
18.8247	0.02034	0.02357	0.04065	0.66577	0.81666	1.00291	0.88657	1.1741	1.47601
18.8437	0.02012	0.0235	0.03961	0.66322	0.81883	0.99985	0.88343	1.17766	1.4866
18.8628	0.02011	0.02332	0.03989	0.66057	0.82141	1.00551	0.88014	1.18178	1.4985
18.8819	0.01995	0.02318	0.03974	0.66215	0.82002	1.00576	0.88247	1.1801	1.4926
18.901	0.01956	0.02325	0.0396	0.66126	0.81859	0.99344	0.88151	1.17835	1.49003
18.92	0.01946	0.02328	0.03976	0.65879	0.81116	0.99331	0.87849	1.16807	1.47213
18.9391	0.01905	0.02312	0.03983	0.65895	0.81019	0.99394	0.87896	1.16704	1.46952
18.9582	0.01901	0.02322	0.03929	0.65961	0.81019	0.98861	0.88015	1.16742	1.46905
18.9773	0.01895	0.02317	0.03894	0.6558	0.81079	0.98202	0.87535	1.16859	1.4765
18.9963	0.01886	0.02302	0.03916	0.6536	0.81392	0.98277	0.87264	1.17341	1.48921
19.0154	0.01873	0.02305	0.03909	0.65488	0.81771	0.98815	0.87458	1.17928	1.49922
19.0345	0.01857	0.02295	0.03905	0.66246	0.81666	0.97174	0.88492	1.1782	1.48614
19.0535	0.01848	0.02297	0.03934	0.66384	0.81815	0.97693	0.88698	1.18075	1.48919
19.0726	0.01856	0.02305	0.03914	0.66448	0.81495	0.96575	0.88806	1.17654	1.47944
19.0917	0.0185	0.02317	0.03815	0.66435	0.82239	0.97047	0.88815	1.18766	1.50214
19.1108	0.01837	0.02306	0.03784	0.66042	0.82252	0.97582	0.88314	1.18816	1.50844
19.1298	0.01833	0.023	0.03781	0.65796	0.81932	0.97073	0.88009	1.1839	1.50291
19.1489	0.01826	0.02291	0.03769	0.6578	0.82013	0.97028	0.88011	1.18555	1.50627
19.168	0.01811	0.02288	0.03744	0.65532	0.81486	0.97379	0.87703	1.17839	1.49481
19.1871	0.01805	0.02311	0.03749	0.65691	0.81886	0.98793	0.87936	1.18459	1.50509
19.2061	0.0182	0.02333	0.03767	0.65471	0.82165	0.9907	0.87666	1.18903	1.51701
19.2252	0.01854	0.02322	0.03702	0.65472	0.81391	0.98809	0.87691	1.17833	1.49483
19.2443	0.01864	0.02316	0.03727	0.65809	0.81097	0.98962	0.8817	1.17452	1.48198
19.2634	0.01868	0.02309	0.0368	0.65771	0.81181	0.97725	0.88144	1.17608	1.48544
19.2824	0.01858	0.02376	0.03691	0.65802	0.82174	0.9732	0.88208	1.19088	1.51512
19.3015	0.01828	0.02408	0.03701	0.65763	0.81356	0.98172	0.88176	1.17941	1.49195
19.3206	0.01809	0.0242	0.03653	0.65727	0.81601	0.9764	0.88147	1.18345	1.50052
19.3396	0.01808	0.02431	0.03655	0.65951	0.8176	0.97503	0.88467	1.18617	1.50274
19.3587	0.01804	0.02404	0.03687	0.66085	0.81663	0.96977	0.88669	1.18521	1.49865
19.3778	0.01813	0.02403	0.03759	0.65932	0.82398	0.9653	0.88487	1.1963	1.52331
19.3969	0.01812	0.02414	0.03757	0.65947	0.82507	0.9607	0.8853	1.19825	1.52685
19.4159	0.01807	0.02395	0.03706	0.65762	0.83113	0.95824	0.88304	1.20745	1.54807
19.435	0.01806	0.02387	0.03694	0.65898	0.83299	0.96182	0.8851	1.21048	1.55214
19.4541	0.01796	0.02396	0.0365	0.65884	0.82789	0.95874	0.88515	1.20348	1.53772
19.4732	0.01806	0.02447	0.03649	0.66043	0.82879	0.95751	0.88755	1.20518	1.53869
19.4922	0.01826	0.02442	0.03714	0.66062	0.82883	0.95857	0.88803	1.20562	1.5391
19.5113	0.01852	0.02458	0.03689	0.65914	0.83194	0.95923	0.8863	1.21057	1.55105
19.5304	0.01875	0.02461	0.03673	0.65776	0.83286	0.96404	0.88466	1.21228	1.55629
19.5495	0.01877	0.02444	0.03654	0.65647	0.83293	0.9582	0.88316	1.21282	1.55896
19.5685	0.01858	0.02461	0.03648	0.65768	0.8347	0.9685	0.88502	1.21584	1.56321
19.5876	0.01845	0.0247	0.03639	0.65842	0.83399	0.98473	0.88621	1.21528	1.56081
19.6067	0.01834	0.02517	0.0362	0.65419	0.82947	0.97801	0.88074	1.20908	1.55384
19.6257	0.01845	0.02551	0.03622	0.65005	0.82986	0.97914	0.87547	1.20994	1.56114
19.6448	0.01839	0.02539	0.03586	0.64824	0.8401	0.9768	0.87335	1.2253	1.59485
19.6639	0.01841	0.02533	0.03581	0.64745	0.84039	0.97978	0.87256	1.22619	1.59749
19.683	0.01843	0.02523	0.036	0.64504	0.83483	0.98588	0.86955	1.21862	1.58516
19.702	0.01842	0.0253	0.03628	0.64581	0.83643	0.98388	0.87078	1.22139	1.58953
19.7211	0.01841	0.02538	0.03659	0.64717	0.83943	0.9835	0.87284	1.22613	1.59709
19.7402	0.0184	0.02542	0.03641	0.64928	0.84387	0.98231	0.87589	1.23307	1.60812
19.7593	0.01845	0.02551	0.03712	0.64864	0.85305	0.97528	0.87524	1.24691	1.63717
19.7783	0.01852	0.02544	0.03854	0.64607	0.84369	0.96271	0.87202	1.23368	1.61343
19.7974	0.01831	0.02528	0.03894	0.6485	0.83976	0.94985	0.87556	1.22839	1.59886
19.8165	0.01809	0.0254	0.03947	0.64915	0.84225	0.94765	0.87666	1.23253	1.60619
19.8356	0.01795	0.02583	0.03962	0.64825	0.84257	0.94514	0.87566	1.2334	1.60902
19.8546	0.01784	0.02566	0.03984	0.64791	0.84348	0.94399	0.8754	1.23511	1.61281
19.8737	0.0178	0.02494	0.04018	0.64937	0.84103	0.94838	0.87763	1.232	1.60409
19.8928	0.01802	0.02477	0.04022	0.64785	0.84055	0.93706	0.87582	1.23169	1.60537
19.9119	0.01829	0.02482	0.04026	0.64958	0.83235	0.94824	0.87841	1.22018	1.57905
19.9309	0.01857	0.02514	0.0401	0.64894	0.82931	0.94265	0.87778	1.21613	1.5714
19.95	0.01866	0.02561	0.03953	0.64839	0.82884	0.94405	0.87726	1.21586	1.5714
19.9691	0.0186	0.0253	0.03883	0.65164	0.82568	0.94838	0.88185	1.21169	1.55801
19.9881	0.0186	0.02495	0.03835	0.65538	0.82424	0.95224	0.88712	1.20993	1.54887
20.0072	0.01859	0.02482	0.03847	0.6583	0.81358	0.95269	0.89132	1.19472	1.5133
20.0263	0.01859	0.02488	0.03849	0.65632	0.81133	0.94988	0.8889	1.19183	1.5099
20.0454	0.01868	0.02516	0.03828	0.65358	0.81835	0.95379	0.88544	1.20259	1.5356
20.0644	0.01882	0.02554	0.0383	0.65244	0.8188	0.95342	0.88414	1.20367	1.53917
20.0835	0.01873	0.02576	0.0376	0.65454	0.8204	0.95833	0.88722	1.20643	1.5416
20.1026	0.01876	0.02573	0.03834	0.65549	0.81676	0.95662	0.8887	1.20147	1.52989
20.1217	0.01875	0.02569	0.03833	0.65529	0.81831	0.95369	0.88863	1.20408	1.53531
20.1407	0.01883	0.02571	0.03851	0.65822	0.82013	0.96006	0.89284	1.20718	1.53724
20.1598	0.01911	0.02567	0.03857	0.65679	0.81947	0.95177	0.89116	1.20663	1.53789
20.1789	0.01935	0.02572	0.03853	0.65457	0.82129	0.93782	0.88837	1.20974	1.54718
20.198	0.01941	0.02533	0.03846	0.65696	0.82344	0.95628	0.89183	1.21333	1.5509
20.217	0.01918	0.02524	0.0383	0.65918	0.8265	0.95697	0.89509	1.21821	1.55749
20.2361	0.01905	0.02559	0.03848	0.65715	0.81808	0.95042	0.89255	1.20627	1.53568
20.2552	0.01905	0.02559	0.03833	0.65761	0.81732	0.94768	0.89339	1.20552	1.53326
20.2742	0.01925	0.02558	0.03832	0.66188	0.8144	0.9337	0.89945	1.20162	1.51889
20.2933	0.01947	0.02552	0.03791	0.66466	0.81357	0.92792	0.90345	1.20082	1.51305
20.3124	0.01956	0.02578	0.03756	0.66116	0.81829	0.92672	0.89894	1.20826	1.53305
20.3315	0.01974	0.02606	0.03752	0.65884	0.81436	0.94052	0.89602	1.20304	1.52541
20.3505	0.0197	0.0261	0.03681	0.66057	0.81199	0.94003	0.89863	1.20013	1.51671
20.3696	0.01954	0.0261	0.03555	0.66175	0.81367	0.93735	0.90046	1.20299	1.52064
20.3887	0.01961	0.02618	0.03582	0.6574	0.81405	0.94898	0.8948	1.20386	1.52838
20.4078	0.01966	0.02636	0.03551	0.65764	0.81104	0.95996	0.89535	1.19979	1.51945
20.4268	0.01957	0.02634	0.03486	0.66005	0.80931	0.96062	0.8989	1.19757	1.51119
20.4459	0.01951	0.02656	0.03449	0.65959	0.80863	0.96887	0.89849	1.19703	1.51049
20.465	0.01953	0.02658	0.03371	0.65772	0.80118	0.96645	0.89618	1.18653	1.49139
20.4841	0.01953	0.02652	0.03333	0.66302	0.79986	0.96481	0.90365	1.18503	1.48049
20.5031	0.01935	0.02652	0.03315	0.6585	0.79862	0.9511	0.89775	1.18361	1.48376
20.5222	0.01927	0.02614	0.03355	0.65817	0.79912	0.95681	0.89755	1.18465	1.48611
20.5413	0.01941	0.02598	0.03343	0.65549	0.79669	0.95483	0.89414	1.18134	1.48289
20.5604	0.01951	0.02608	0.03319	0.65323	0.79506	0.95025	0.89129	1.17934	1.48179
20.5794	0.01941	0.02621	0.03361	0.65295	0.79683	0.95477	0.89114	1.18245	1.48831
20.5985	0.01945	0.02619	0.03428	0.65556	0.80105	0.95231	0.89493	1.18923	1.49824
20.6176	0.01957	0.02598	0.03443	0.655	0.79973	0.94983	0.89439	1.18769	1.49566
20.6366	0.01954	0.02557	0.0351	0.65741	0.79509	0.94515	0.89792	1.18121	1.47867
20.6557	0.01944	0.02456	0.03511	0.65649	0.80126	0.94921	0.89694	1.19074	1.49923
20.6748	0.01957	0.02401	0.03488	0.65381	0.79831	0.94265	0.89352	1.18667	1.49448
20.6939	0.01934	0.02358	0.03388	0.64965	0.80225	0.94175	0.88808	1.19298	1.51313
20.7129	0.0192	0.02359	0.03382	0.65146	0.79901	0.94204	0.89077	1.18863	1.5014
20.732	0.01899	0.02355	0.03345	0.64943	0.79582	0.9339	0.88827	1.18431	1.49516
20.7511	0.01881	0.02345	0.03302	0.64742	0.79652	0.93141	0.88578	1.18572	1.50065
20.7702	0.01876	0.02323	0.03299	0.65206	0.79538	0.9312	0.89237	1.18441	1.49105
20.7892	0.01885	0.02309	0.03286	0.65269	0.79319	0.91323	0.89348	1.18155	1.48402
20.8083	0.01882	0.02281	0.03272	0.64744	0.79337	0.90934	0.88657	1.18229	1.49279
20.8274	0.01875	0.02251	0.0325	0.64908	0.78936	0.92373	0.88902	1.17676	1.47889
20.8465	0.01852	0.02287	0.03263	0.65002	0.78742	0.93471	0.89052	1.17428	1.47222
20.8655	0.01827	0.02285	0.03236	0.64689	0.79059	0.93779	0.88644	1.17939	1.48699
20.8846	0.01802	0.02288	0.03243	0.64351	0.79595	0.94044	0.88203	1.18784	1.50893
20.9037	0.01807	0.02248	0.03271	0.64291	0.78999	0.94063	0.8814	1.17942	1.49235
20.9227	0.01798	0.02199	0.03273	0.64019	0.78306	0.92935	0.8779	1.16955	1.47578
20.9418	0.01783	0.02192	0.03283	0.63549	0.77864	0.93289	0.87171	1.16338	1.46963
20.9609	0.01793	0.02205	0.03282	0.63544	0.78194	0.9392	0.87189	1.16868	1.48031
20.98	0.01788	0.02215	0.03194	0.64063	0.78753	0.92927	0.87927	1.17747	1.49058
20.999	0.01775	0.02218	0.03165	0.63984	0.7869	0.91854	0.87844	1.17699	1.49046
21.0181	0.01791	0.02186	0.03233	0.63679	0.7858	0.93487	0.87454	1.17573	1.49198
21.0372	0.01812	0.02162	0.03295	0.64001	0.78997	0.92479	0.8792	1.18236	1.50068
21.0563	0.01821	0.0217	0.03314	0.6421	0.79202	0.92964	0.88232	1.18583	1.50452
21.0753	0.01812	0.02183	0.03324	0.63672	0.79388	0.93659	0.87513	1.18901	1.51858
21.0944	0.01806	0.0216	0.03344	0.63692	0.79274	0.93839	0.87557	1.18775	1.51554
21.1135	0.01776	0.02127	0.03336	0.63757	0.79446	0.93453	0.87665	1.19076	1.52057
21.1326	0.01731	0.02105	0.03381	0.64106	0.80065	0.93334	0.88169	1.2004	1.53505
21.1516	0.01706	0.02125	0.03421	0.64356	0.79873	0.9319	0.88541	1.19788	1.52596
21.1707	0.01706	0.02153	0.03371	0.64289	0.80142	0.92224	0.88479	1.20226	1.5356
21.1898	0.01699	0.02159	0.03288	0.6371	0.80179	0.92345	0.87711	1.20324	1.54567
21.2088	0.01681	0.02161	0.03353	0.63984	0.80384	0.92992	0.88111	1.20678	1.54874
21.2279	0.01691	0.0218	0.03307	0.64295	0.80363	0.92764	0.88561	1.20693	1.54433
21.247	0.0171	0.02202	0.03339	0.64262	0.79708	0.92762	0.88537	1.19753	1.5253
21.2661	0.01717	0.02217	0.03378	0.64283	0.7971	0.93012	0.88589	1.19787	1.52545
21.2851	0.01746	0.02211	0.03387	0.64328	0.79771	0.92889	0.88672	1.19918	1.52727
21.3042	0.01766	0.02205	0.03374	0.64126	0.80722	0.92548	0.88417	1.21388	1.56008
21.3233	0.01777	0.02226	0.03389	0.63941	0.80562	0.92624	0.88184	1.21186	1.55837
21.3424	0.0177	0.02218	0.0342	0.6433	0.80304	0.92661	0.88744	1.20836	1.54533
21.3614	0.0175	0.02241	0.03423	0.64189	0.8011	0.9364	0.88574	1.20584	1.54195
21.3805	0.0172	0.02248	0.0344	0.6421	0.80191	0.93928	0.8863	1.2074	1.54455
21.3996	0.01723	0.02254	0.03477	0.64674	0.79877	0.93903	0.89295	1.20306	1.52868
21.4187	0.01738	0.0225	0.0348	0.65112	0.79917	0.93242	0.89926	1.20407	1.52411
21.4377	0.01744	0.02225	0.03517	0.64866	0.7984	0.92068	0.8961	1.20329	1.52584
21.4568	0.01741	0.02255	0.03567	0.6463	0.80372	0.91616	0.89308	1.21176	1.54638
21.4759	0.01732	0.02293	0.03575	0.64837	0.80492	0.92715	0.8962	1.214	1.54769
21.495	0.01714	0.02346	0.03544	0.6501	0.8044	0.9351	0.89885	1.21355	1.54398
21.514	0.01696	0.02351	0.03528	0.6512	0.80735	0.93499	0.9006	1.21845	1.55218
21.5331	0.01698	0.02348	0.0352	0.65144	0.80426	0.93505	0.90114	1.21423	1.54297
21.5522	0.01684	0.02334	0.03571	0.65447	0.80185	0.92745	0.90555	1.21106	1.53184
21.5712	0.01676	0.02325	0.0361	0.64892	0.79502	0.92464	0.8981	1.20117	1.51939
21.5903	0.01677	0.02306	0.03619	0.64824	0.79756	0.92351	0.89734	1.20546	1.52898
21.6094	0.01682	0.02298	0.03603	0.64748	0.79953	0.90519	0.89649	1.20881	1.53674
21.6285	0.01671	0.02292	0.03559	0.64426	0.79537	0.91472	0.89227	1.20298	1.52921
21.6475	0.01658	0.02321	0.03557	0.64083	0.79708	0.91236	0.88779	1.206	1.54012
21.6666	0.01665	0.02351	0.03621	0.64599	0.79818	0.90465	0.89521	1.20812	1.53667
21.6857	0.01666	0.02367	0.03653	0.64887	0.80194	0.90833	0.89947	1.21426	1.54479
21.7048	0.01672	0.0239	0.03629	0.64994	0.80119	0.90631	0.90124	1.21355	1.54147
21.7238	0.01686	0.0237	0.03619	0.6465	0.79669	0.9093	0.89669	1.20721	1.53325
21.7429	0.01713	0.02345	0.03599	0.64883	0.79679	0.91059	0.90017	1.20774	1.53069
21.762	0.01707	0.02311	0.03621	0.64608	0.79594	0.9138	0.89658	1.20688	1.5327
21.7811	0.01702	0.02317	0.03651	0.64572	0.79304	0.91459	0.89627	1.20288	1.52483
21.8001	0.01693	0.02323	0.03585	0.64355	0.79675	0.91083	0.89347	1.20894	1.54017
21.8192	0.01672	0.02305	0.03623	0.63894	0.80002	0.92407	0.88733	1.21436	1.55774
21.8383	0.01642	0.02304	0.03613	0.63985	0.80031	0.92255	0.88884	1.21528	1.55805
21.8573	0.01636	0.02305	0.03593	0.63763	0.80351	0.91929	0.88598	1.22057	1.57188
21.8764	0.01623	0.0232	0.03647	0.64132	0.80154	0.92876	0.89137	1.21804	1.56104
21.8955	0.01615	0.02319	0.03661	0.64395	0.79562	0.92937	0.8953	1.20952	1.53945
21.9146	0.0161	0.02312	0.03689	0.6417	0.80265	0.92584	0.89241	1.22065	1.5653
21.9336	0.01638	0.02325	0.03677	0.64284	0.80735	0.93547	0.89424	1.22825	1.57897
21.9527	0.01646	0.02343	0.03677	0.64683	0.80609	0.92528	0.90002	1.22679	1.56989
21.9718	0.01662	0.02357	0.03687	0.64513	0.8042	0.92781	0.89788	1.22433	1.5671
21.9909	0.01669	0.02381	0.03682	0.64056	0.80281	0.93831	0.89175	1.22256	1.56992
22.0099	0.01661	0.02391	0.03745	0.6394	0.80513	0.93945	0.89041	1.22645	1.57928
22.029	0.01662	0.02381	0.03717	0.64223	0.80601	0.9398	0.89458	1.22818	1.57846
22.0481	0.01655	0.02374	0.03671	0.64825	0.80013	0.93966	0.90318	1.21978	1.55221
22.0672	0.01667	0.02365	0.03687	0.64491	0.79471	0.92825	0.89874	1.21209	1.54111
22.0862	0.01677	0.02355	0.03685	0.64434	0.80198	0.9313	0.89815	1.22369	1.56551
22.1053	0.01677	0.0239	0.03668	0.64408	0.80679	0.92672	0.89799	1.23149	1.58166
22.1244	0.01701	0.02404	0.03695	0.64833	0.80687	0.92402	0.90417	1.23201	1.57623
22.1434	0.01733	0.02401	0.03623	0.6474	0.81112	0.92202	0.90318	1.23889	1.59138
22.1625	0.01736	0.02392	0.03589	0.64854	0.81042	0.92946	0.90502	1.23818	1.588
22.1816	0.01722	0.02388	0.03618	0.65005	0.80721	0.9307	0.90735	1.2337	1.57637
22.2007	0.01711	0.02404	0.03625	0.65336	0.80468	0.93094	0.91219	1.23021	1.56412
22.2197	0.01712	0.02406	0.03623	0.66031	0.80955	0.9247	0.92213	1.2381	1.56987
22.2388	0.01721	0.02365	0.03607	0.66111	0.805	0.9182	0.92345	1.23159	1.55514
22.2579	0.01703	0.02317	0.03541	0.6588	0.80589	0.91737	0.92051	1.2334	1.56194
22.277	0.01698	0.02325	0.03534	0.65502	0.80388	0.91115	0.91546	1.23071	1.56172
22.296	0.01693	0.0235	0.03512	0.65258	0.80937	0.91975	0.91229	1.23952	1.58311
22.3151	0.01697	0.02375	0.03482	0.65166	0.8153	0.91786	0.9112	1.24905	1.6038
22.3342	0.01684	0.02424	0.03441	0.64527	0.81584	0.9159	0.9025	1.2503	1.6155
22.3533	0.01682	0.02437	0.03416	0.64843	0.81655	0.91283	0.90714	1.25196	1.61403
22.3723	0.01688	0.02432	0.03379	0.65295	0.81375	0.91259	0.91374	1.24815	1.59928
22.3914	0.01708	0.02426	0.03347	0.65276	0.80768	0.91631	0.91373	1.23924	1.58104
22.4105	0.01738	0.02438	0.03289	0.65278	0.80126	0.90083	0.91398	1.22975	1.56131
22.4296	0.01742	0.0242	0.03231	0.64963	0.80311	0.89948	0.9098	1.23293	1.57223
22.4486	0.01728	0.02413	0.03199	0.65052	0.80839	0.89937	0.91124	1.24147	1.58821
22.4677	0.01708	0.02401	0.03132	0.64831	0.80724	0.88756	0.90836	1.24014	1.58852
22.4868	0.01693	0.02414	0.0314	0.64556	0.81113	0.89367	0.90474	1.24662	1.6056
22.5058	0.01691	0.02424	0.03098	0.64899	0.80739	0.90035	0.90977	1.24133	1.58946
22.5249	0.01672	0.02414	0.03068	0.64375	0.80555	0.89036	0.90269	1.23893	1.59199
22.544	0.01688	0.02382	0.03023	0.63855	0.80678	0.88858	0.89568	1.24122	1.60405
22.5631	0.01697	0.02343	0.02987	0.63779	0.81145	0.88363	0.89483	1.24886	1.62059
22.5821	0.01687	0.02312	0.02953	0.63983	0.8171	0.87352	0.89792	1.25799	1.63608
22.6012	0.01676	0.02303	0.02854	0.63571	0.81731	0.86249	0.89239	1.25878	1.64348
22.6203	0.01669	0.02321	0.02834	0.63233	0.82367	0.86485	0.88789	1.26897	1.66911
22.6394	0.01676	0.02332	0.02841	0.6268	0.81887	0.86683	0.8804	1.26191	1.66249
22.6584	0.01675	0.02296	0.02812	0.62953	0.81457	0.86445	0.88446	1.2556	1.64529
22.6775	0.01666	0.02263	0.02853	0.63331	0.80667	0.85172	0.89001	1.24383	1.61534
22.6966	0.01669	0.02217	0.02888	0.63329	0.80022	0.85173	0.89021	1.2344	1.59581
22.7157	0.01636	0.02195	0.02851	0.63092	0.79898	0.85345	0.88711	1.23294	1.59606
22.7347	0.01601	0.02192	0.0285	0.62586	0.79203	0.8537	0.88021	1.22268	1.58226
22.7538	0.01591	0.02209	0.02842	0.6256	0.79164	0.84591	0.88007	1.22245	1.58195
22.7729	0.01598	0.02231	0.0281	0.62838	0.79043	0.84522	0.88424	1.22099	1.57458
22.7919	0.01583	0.02225	0.02744	0.62566	0.79168	0.84575	0.88067	1.22328	1.58303
22.811	0.0157	0.02243	0.0274	0.61794	0.78681	0.84192	0.87007	1.21621	1.57966
22.8301	0.01547	0.02238	0.02739	0.61503	0.79219	0.84929	0.86619	1.22498	1.60171
22.8492	0.0155	0.02233	0.02728	0.61401	0.78746	0.8487	0.86498	1.2181	1.58887
22.8682	0.01558	0.02207	0.02695	0.61699	0.78656	0.85056	0.86938	1.21714	1.58229
22.8873	0.0156	0.02157	0.02716	0.61861	0.77941	0.85035	0.87189	1.20652	1.55787
22.9064	0.01557	0.02124	0.02753	0.62287	0.77227	0.85075	0.87814	1.19586	1.52947
22.9255	0.01547	0.02062	0.02768	0.62431	0.77604	0.85188	0.88041	1.20212	1.53992
22.9445	0.01551	0.0205	0.02761	0.62232	0.77726	0.85482	0.87788	1.20444	1.54734
22.9636	0.01558	0.02049	0.02774	0.62082	0.7835	0.8634	0.87601	1.21451	1.56993
22.9827	0.01544	0.02063	0.02789	0.62657	0.7849	0.85582	0.88433	1.2171	1.56651
23.0018	0.01515	0.02057	0.02783	0.6285	0.79093	0.86487	0.88726	1.2269	1.58352
23.0208	0.015	0.02077	0.02821	0.63089	0.78818	0.86748	0.89085	1.22309	1.57195
23.0399	0.01493	0.02071	0.02824	0.63351	0.7818	0.86845	0.89478	1.21366	1.54848
23.059	0.01504	0.02077	0.02832	0.634	0.77754	0.86963	0.89571	1.20743	1.53473
23.0781	0.0151	0.02067	0.02822	0.63568	0.76909	0.86116	0.89831	1.19466	1.50584
23.0971	0.01513	0.0205	0.02813	0.63187	0.76707	0.85638	0.89315	1.19192	1.50562
23.1162	0.01504	0.02074	0.02819	0.63466	0.76849	0.86197	0.89733	1.19461	1.50675
23.1353	0.01486	0.02084	0.02849	0.63241	0.76862	0.86256	0.89435	1.19527	1.51124
23.1543	0.01478	0.02109	0.02919	0.63617	0.76358	0.86261	0.89989	1.18784	1.49018
23.1734	0.01499	0.02118	0.02921	0.63221	0.76107	0.86151	0.89452	1.18432	1.4886
23.1925	0.01511	0.02138	0.02977	0.63081	0.75812	0.86409	0.89276	1.18011	1.48182
23.2116	0.01516	0.02124	0.02997	0.62989	0.74984	0.87252	0.89166	1.16769	1.45751
23.2306	0.01521	0.02106	0.02989	0.62945	0.75527	0.87525	0.89125	1.17662	1.47626
23.2497	0.0152	0.02099	0.02989	0.62694	0.75937	0.87437	0.88793	1.18348	1.49381
23.2688	0.01526	0.02094	0.02967	0.62433	0.75955	0.87465	0.8845	1.18415	1.49878
23.2879	0.01518	0.02103	0.02969	0.6234	0.75628	0.87793	0.88341	1.17941	1.49021
23.3069	0.01532	0.02111	0.03039	0.62228	0.75962	0.87433	0.88203	1.18493	1.50298
23.326	0.01534	0.02104	0.03075	0.62445	0.76204	0.8732	0.88529	1.18908	1.50805
23.3451	0.01553	0.02079	0.03101	0.62439	0.76647	0.87439	0.88539	1.19639	1.52294
23.3642	0.01544	0.02073	0.03106	0.61913	0.76569	0.87293	0.87817	1.1956	1.52889
23.3832	0.01547	0.02072	0.03128	0.61629	0.7654	0.87302	0.87438	1.19555	1.53277
23.4023	0.01547	0.02057	0.0317	0.62229	0.76287	0.87399	0.88315	1.19199	1.51627
23.4214	0.01546	0.02071	0.03185	0.62623	0.76167	0.87484	0.88899	1.19053	1.50715
23.4404	0.01535	0.02072	0.03171	0.62671	0.75989	0.87954	0.88989	1.1881	1.50121
23.4595	0.0152	0.02076	0.03156	0.62571	0.75922	0.87678	0.8887	1.18745	1.50115
23.4786	0.0151	0.02085	0.03153	0.62401	0.759	0.86786	0.8865	1.1875	1.50355
23.4977	0.01507	0.02136	0.03121	0.62227	0.75864	0.86486	0.88424	1.18735	1.50561
23.5167	0.01521	0.02175	0.03117	0.62223	0.7573	0.86328	0.88442	1.18575	1.50215
23.5358	0.01529	0.02196	0.03118	0.62254	0.75639	0.86057	0.88509	1.1848	1.4995
23.5549	0.01515	0.0218	0.03103	0.62139	0.75474	0.85733	0.88372	1.1827	1.49664
23.574	0.01503	0.0217	0.03104	0.61517	0.75484	0.86604	0.87516	1.18328	1.50679
23.593	0.01513	0.02159	0.03127	0.61076	0.74811	0.86858	0.86914	1.17315	1.49236
23.6121	0.01525	0.02168	0.03166	0.60957	0.74601	0.86473	0.86769	1.17028	1.48799
23.6312	0.01533	0.02168	0.03208	0.60719	0.74378	0.86322	0.86454	1.1672	1.48499
23.6503	0.01545	0.02167	0.03203	0.60667	0.74573	0.8623	0.86404	1.17066	1.49262
23.6693	0.0155	0.02156	0.03172	0.60627	0.74502	0.86213	0.86371	1.16991	1.49142
23.6884	0.01553	0.02145	0.03168	0.60641	0.74947	0.87283	0.86411	1.17733	1.50621
23.7075	0.01555	0.0213	0.03173	0.60228	0.75219	0.86574	0.85845	1.18208	1.52188
23.7265	0.01551	0.02126	0.0316	0.60194	0.74871	0.86345	0.85817	1.17702	1.51181
23.7456	0.01538	0.02122	0.03126	0.59764	0.74945	0.86492	0.8523	1.1786	1.52122
23.7647	0.01509	0.02115	0.03148	0.59977	0.74737	0.87046	0.85555	1.17579	1.51203
23.7838	0.01488	0.02078	0.03151	0.59963	0.74995	0.8689	0.85557	1.18026	1.52117
23.8028	0.01479	0.02059	0.03143	0.60476	0.75429	0.86046	0.86311	1.18752	1.52815
23.8219	0.01468	0.02039	0.03157	0.60404	0.7506	0.85802	0.86231	1.18209	1.51787
23.841	0.01463	0.0204	0.03153	0.60445	0.74747	0.86526	0.8631	1.17752	1.50765
23.8601	0.01458	0.02036	0.03129	0.60606	0.74517	0.86616	0.86565	1.17425	1.49828
23.8791	0.01457	0.0206	0.03135	0.60602	0.74708	0.86558	0.86581	1.17766	1.5051
23.8982	0.01444	0.02076	0.03056	0.60695	0.7481	0.86413	0.86738	1.17977	1.50778
23.9173	0.01444	0.02059	0.03016	0.60643	0.74657	0.86745	0.86687	1.17781	1.5043
23.9364	0.01429	0.02047	0.03004	0.60528	0.74345	0.8707	0.86546	1.17335	1.49663
23.9554	0.01437	0.02024	0.03025	0.60439	0.74281	0.87157	0.86438	1.17271	1.49645
23.9745	0.01436	0.02032	0.0303	0.6058	0.75419	0.87187	0.86659	1.19112	1.53189
23.9936	0.01459	0.02043	0.03022	0.59996	0.75649	0.88452	0.85845	1.19514	1.54865
24.0127	0.01461	0.02033	0.03033	0.59791	0.74981	0.8744	0.85574	1.185	1.53072
24.0317	0.01464	0.02032	0.03075	0.59605	0.75753	0.8682	0.85333	1.19762	1.55912
24.0508	0.01477	0.02027	0.03089	0.59308	0.7553	0.87371	0.84931	1.19448	1.55691
24.0699	0.01488	0.02027	0.03102	0.59541	0.75493	0.87457	0.8529	1.1943	1.55277
24.0889	0.015	0.02005	0.03109	0.59467	0.75568	0.88292	0.85208	1.19588	1.55687
24.108	0.01498	0.01976	0.03129	0.59314	0.75342	0.88254	0.85009	1.19275	1.55255
24.1271	0.01489	0.01951	0.03134	0.59547	0.75231	0.8813	0.85366	1.19151	1.54625
24.1462	0.01485	0.01958	0.03134	0.59175	0.74911	0.87286	0.84856	1.18688	1.54211
24.1652	0.0149	0.02009	0.03127	0.59262	0.74776	0.87473	0.85003	1.18517	1.53706
24.1843	0.01475	0.02029	0.03163	0.59542	0.7519	0.87779	0.85426	1.19212	1.54687
24.2034	0.01466	0.02002	0.03092	0.5984	0.7563	0.87814	0.85878	1.19943	1.55711
24.2225	0.01454	0.02015	0.03044	0.60224	0.75517	0.87809	0.86452	1.19794	1.54803
24.2415	0.01431	0.01994	0.03052	0.60718	0.75198	0.87879	0.87186	1.19322	1.53065
24.2606	0.01428	0.01984	0.03055	0.60862	0.755	0.88236	0.87418	1.1984	1.53882
24.2797	0.01421	0.01977	0.03102	0.60901	0.75478	0.87237	0.87496	1.19859	1.53839
24.2988	0.01417	0.0196	0.03124	0.6123	0.74698	0.87216	0.8799	1.18663	1.5087
24.3178	0.01433	0.01948	0.03133	0.61859	0.74961	0.87185	0.88915	1.19116	1.50826
24.3369	0.01431	0.01933	0.03105	0.62663	0.74929	0.86653	0.90094	1.19105	1.49566
24.356	0.0144	0.01932	0.03107	0.62409	0.75633	0.86947	0.89751	1.20268	1.52311
24.375	0.01455	0.01951	0.03096	0.62631	0.76285	0.86944	0.90093	1.21351	1.54171
24.3941	0.01473	0.01977	0.03074	0.62217	0.75844	0.86512	0.89525	1.20687	1.53406
24.4132	0.01491	0.0198	0.03047	0.62264	0.75846	0.86609	0.89613	1.20728	1.53398
24.4323	0.01509	0.01971	0.03034	0.62375	0.7604	0.86166	0.89794	1.2108	1.5393
24.4513	0.01518	0.01976	0.03038	0.62104	0.76656	0.86086	0.89425	1.22102	1.56412
24.4704	0.01521	0.01954	0.03008	0.62427	0.76842	0.85844	0.89911	1.22443	1.56603
24.4895	0.01537	0.01923	0.03018	0.62368	0.77278	0.85989	0.89849	1.23186	1.58191
24.5086	0.01559	0.01938	0.03029	0.62628	0.77794	0.85868	0.9025	1.24049	1.59539
24.5276	0.01583	0.01951	0.0301	0.62971	0.78427	0.85214	0.90772	1.25099	1.61142
24.5467	0.01573	0.01995	0.03008	0.63504	0.78337	0.85102	0.91566	1.24997	1.60099
24.5658	0.01571	0.02031	0.0298	0.63699	0.77312	0.85608	0.91872	1.23415	1.56535
24.5849	0.01543	0.02021	0.02925	0.63699	0.77237	0.85231	0.91893	1.23336	1.56351
24.6039	0.01533	0.02034	0.0291	0.64117	0.77407	0.87116	0.9252	1.23646	1.56327
24.623	0.01532	0.02045	0.02897	0.64059	0.76733	0.88009	0.92458	1.22613	1.54276
24.6421	0.01523	0.02059	0.02894	0.64184	0.76589	0.87563	0.9266	1.22417	1.53662
24.6611	0.01531	0.02059	0.02867	0.63858	0.77519	0.87617	0.92212	1.23949	1.57273
24.6802	0.01524	0.02069	0.02855	0.64146	0.78194	0.87041	0.92653	1.25076	1.5912
24.6993	0.01526	0.02088	0.02833	0.64031	0.78014	0.87036	0.92511	1.24829	1.58764
24.7184	0.0153	0.0211	0.02807	0.63822	0.77464	0.87176	0.92237	1.23991	1.57331
24.7374	0.01541	0.02102	0.02799	0.64088	0.77338	0.87972	0.92644	1.23826	1.56567
24.7565	0.01546	0.02054	0.02809	0.63918	0.77516	0.87864	0.92423	1.24146	1.57456
24.7756	0.01548	0.02041	0.02782	0.64126	0.7727	0.86288	0.92748	1.23796	1.56396
24.7947	0.01564	0.02046	0.02849	0.64231	0.77073	0.86255	0.92928	1.23526	1.55654
24.8137	0.01562	0.02034	0.02889	0.63868	0.77084	0.86592	0.92427	1.23582	1.56296
24.8328	0.01562	0.02036	0.0288	0.63218	0.77632	0.87094	0.91511	1.24505	1.5915
24.8519	0.01551	0.02059	0.02893	0.63123	0.77628	0.86888	0.914	1.24543	1.59343
24.871	0.01561	0.02075	0.02873	0.63367	0.76966	0.87521	0.91779	1.23521	1.56849
24.89	0.01555	0.02061	0.0286	0.6308	0.76951	0.87406	0.91387	1.23531	1.57283
24.9091	0.01543	0.02041	0.02856	0.62692	0.77268	0.87654	0.90852	1.24084	1.58977
24.9282	0.01547	0.02039	0.02878	0.62002	0.77037	0.87661	0.89883	1.2375	1.5931
24.9473	0.01539	0.02053	0.02862	0.62186	0.76348	0.86667	0.90173	1.22691	1.56835
24.9663	0.01541	0.02047	0.02806	0.62364	0.75215	0.87322	0.90459	1.20923	1.5291
24.9854	0.0154	0.02036	0.0281	0.62306	0.75298	0.87615	0.90399	1.21101	1.53338
25.0045	0.01528	0.0203	0.02842	0.62409	0.75094	0.87007	0.90571	1.20813	1.52567
25.0235	0.01509	0.02043	0.02873	0.6242	0.74868	0.87338	0.90611	1.20486	1.51855
25.0426	0.01497	0.02039	0.02872	0.62428	0.74416	0.88181	0.90647	1.19805	1.5042
25.0617	0.01491	0.02028	0.02897	0.62311	0.74013	0.88068	0.90504	1.19203	1.49338
25.0808	0.01464	0.0203	0.02891	0.62764	0.73593	0.8789	0.91185	1.18582	1.47349
25.0998	0.0144	0.02041	0.02897	0.62591	0.74027	0.88584	0.90959	1.19334	1.49128
25.1189	0.01412	0.02023	0.02893	0.62479	0.73776	0.8873	0.9082	1.18982	1.48552
25.138	0.01415	0.01977	0.02849	0.62237	0.74252	0.8896	0.90494	1.19796	1.50563
25.1571	0.01425	0.01909	0.02873	0.62098	0.74042	0.88374	0.90316	1.19503	1.50148
25.1761	0.01428	0.01898	0.02888	0.62116	0.74138	0.87246	0.90364	1.19701	1.50504
25.1952	0.01436	0.01879	0.02854	0.61505	0.7416	0.85556	0.89501	1.19773	1.51559
25.2143	0.01443	0.0187	0.02847	0.61458	0.74	0.85075	0.89454	1.19551	1.51154
25.2334	0.01445	0.01859	0.02854	0.61585	0.74372	0.84943	0.89661	1.20191	1.52248
25.2524	0.01435	0.01841	0.02838	0.61949	0.73512	0.85349	0.90216	1.18848	1.48911
25.2715	0.01438	0.01819	0.02828	0.61661	0.73025	0.86094	0.89822	1.18103	1.47799
25.2906	0.01425	0.01819	0.02859	0.61895	0.73032	0.86239	0.90184	1.18153	1.4752
25.3096	0.01414	0.01809	0.02864	0.6202	0.73068	0.86298	0.90393	1.18249	1.47497
25.3287	0.01399	0.01824	0.02877	0.61937	0.73043	0.85422	0.90296	1.18249	1.476
25.3478	0.01388	0.01818	0.0286	0.62009	0.72686	0.84693	0.90421	1.17719	1.46381
25.3669	0.01387	0.01821	0.02822	0.61887	0.72716	0.84694	0.90269	1.17807	1.46722
25.3859	0.01369	0.01831	0.02757	0.61508	0.72536	0.84456	0.89743	1.17556	1.46759
25.405	0.01369	0.01837	0.02725	0.61923	0.73072	0.84015	0.90376	1.18464	1.47957
25.4241	0.0138	0.01864	0.02707	0.62043	0.72935	0.8346	0.90575	1.18284	1.47378
25.4432	0.01389	0.01851	0.02698	0.61722	0.73169	0.83332	0.90129	1.18709	1.48718
25.4622	0.01375	0.01841	0.02692	0.61757	0.73711	0.82617	0.90204	1.19635	1.50538
25.4813	0.0138	0.01846	0.0267	0.62203	0.73692	0.82795	0.9088	1.19644	1.49845
25.5004	0.01381	0.01846	0.0265	0.62277	0.73398	0.8228	0.91012	1.19208	1.48813
25.5195	0.01377	0.01843	0.0261	0.62339	0.73343	0.82275	0.91126	1.1915	1.48575
25.5385	0.01378	0.01823	0.02595	0.6242	0.73382	0.82285	0.91264	1.19253	1.48642
25.5576	0.01377	0.01826	0.02607	0.62329	0.73523	0.82292	0.91154	1.19521	1.49307
25.5767	0.01368	0.0183	0.02606	0.62498	0.73863	0.81863	0.91422	1.20121	1.50254
25.5958	0.01377	0.01871	0.02586	0.62698	0.73957	0.81774	0.91738	1.20316	1.50322
25.6148	0.01381	0.01886	0.02569	0.62626	0.7427	0.81688	0.91658	1.20868	1.51539
25.6339	0.0138	0.01906	0.02578	0.62671	0.7407	0.8066	0.91749	1.20576	1.50843
25.653	0.01397	0.01923	0.02565	0.62739	0.74557	0.80573	0.91877	1.21406	1.52412
25.672	0.01422	0.01925	0.02584	0.62535	0.74066	0.80427	0.91612	1.20648	1.51136
25.6911	0.01433	0.01924	0.02569	0.62645	0.7299	0.80723	0.91801	1.18945	1.47448
25.7102	0.0144	0.01938	0.02575	0.62427	0.72675	0.80614	0.91506	1.18477	1.46797
25.7293	0.01445	0.01954	0.0258	0.62327	0.72164	0.81097	0.91382	1.17682	1.45297
25.7483	0.01446	0.01963	0.02585	0.62394	0.72178	0.81137	0.91503	1.17736	1.45281
25.7674	0.01452	0.01964	0.02563	0.6269	0.72194	0.81255	0.9196	1.17802	1.44936
25.7865	0.01454	0.01963	0.02561	0.6291	0.73202	0.8107	0.92304	1.19491	1.48037
25.8056	0.01444	0.01982	0.02555	0.63506	0.73792	0.80628	0.93203	1.20499	1.49159
25.8246	0.01442	0.01998	0.02519	0.63819	0.73565	0.81039	0.93691	1.20174	1.4798
25.8437	0.01444	0.02043	0.02513	0.63582	0.73892	0.80322	0.93371	1.20757	1.49513
25.8628	0.01443	0.02047	0.02507	0.63926	0.73771	0.79143	0.93904	1.20602	1.48636
25.8819	0.01453	0.02025	0.02515	0.63953	0.73811	0.79018	0.93969	1.20703	1.48774
25.9009	0.01458	0.02015	0.02512	0.63789	0.73674	0.78941	0.93758	1.20512	1.48603
25.92	0.01467	0.01995	0.02522	0.63928	0.74138	0.79088	0.93985	1.21308	1.49997
25.9391	0.0148	0.02001	0.02518	0.63754	0.74993	0.79886	0.93749	1.22753	1.53206
25.9581	0.01498	0.02022	0.02523	0.63546	0.74936	0.79982	0.93467	1.22702	1.53398
25.9772	0.01509	0.02072	0.02527	0.63399	0.7488	0.79896	0.93273	1.2265	1.53495
25.9963	0.01524	0.02099	0.02534	0.62839	0.75681	0.81315	0.92474	1.24009	1.57122
26.0154	0.01524	0.0208	0.02575	0.62816	0.76078	0.81147	0.92465	1.24701	1.5855
26.0344	0.01515	0.02085	0.02563	0.62771	0.7565	0.81193	0.92421	1.24038	1.57236
26.0535	0.01524	0.0209	0.02534	0.62887	0.75191	0.81599	0.9262	1.23328	1.55571
26.0726	0.01527	0.02115	0.02541	0.62426	0.7531	0.81458	0.91966	1.23564	1.56742
26.0917	0.0153	0.02137	0.02551	0.62152	0.74979	0.81369	0.9159	1.23063	1.5611
26.1107	0.01543	0.02183	0.02566	0.62174	0.74981	0.81499	0.91649	1.23099	1.56121
26.1298	0.01546	0.02222	0.02597	0.61958	0.75536	0.82738	0.91357	1.24047	1.58372
26.1489	0.01543	0.02204	0.02599	0.61662	0.76031	0.82355	0.90948	1.24898	1.60545
26.168	0.01534	0.02187	0.0259	0.61573	0.757	0.82279	0.90839	1.24396	1.59631
26.187	0.01512	0.02198	0.02632	0.61118	0.75693	0.83051	0.9019	1.24424	1.6037
26.2061	0.01504	0.02211	0.02609	0.6124	0.75602	0.82826	0.90391	1.2432	1.59946
26.2252	0.01494	0.02208	0.02587	0.61137	0.7596	0.82997	0.90262	1.24949	1.61371
26.2442	0.01486	0.02203	0.02577	0.61194	0.7522	0.83271	0.90372	1.23771	1.58841
26.2633	0.01465	0.02207	0.0255	0.61193	0.75189	0.83675	0.90396	1.23757	1.58787
26.2824	0.01451	0.02205	0.02535	0.61033	0.75364	0.82494	0.90183	1.24084	1.59681
26.3015	0.01449	0.02219	0.02532	0.60923	0.75264	0.82399	0.90044	1.23957	1.59565
26.3205	0.01441	0.02256	0.02566	0.6083	0.75203	0.81655	0.89928	1.2389	1.59551
26.3396	0.01433	0.02293	0.02549	0.61142	0.75682	0.81494	0.90415	1.24722	1.60744
26.3587	0.01431	0.02301	0.02546	0.60769	0.76057	0.81322	0.89887	1.25394	1.62675
26.3778	0.01427	0.023	0.02569	0.60433	0.74995	0.81432	0.89412	1.23701	1.59705
26.3968	0.01436	0.02289	0.02562	0.60353	0.7482	0.81904	0.89325	1.23462	1.59305
26.4159	0.01432	0.02291	0.02572	0.60384	0.75251	0.81672	0.89401	1.24206	1.60751
26.435	0.0143	0.02264	0.02593	0.60484	0.7475	0.8172	0.89574	1.23413	1.58943
26.4541	0.01429	0.02269	0.02619	0.59932	0.74484	0.81713	0.88781	1.23011	1.58952
26.4731	0.01423	0.02287	0.02595	0.59892	0.7501	0.81549	0.88744	1.23931	1.60877
26.4922	0.01417	0.02282	0.0259	0.59558	0.74999	0.81437	0.88271	1.23957	1.61427
26.5113	0.01412	0.02281	0.02569	0.59408	0.74587	0.81465	0.88069	1.23322	1.60339
26.5304	0.0142	0.02294	0.02564	0.59475	0.73591	0.80493	0.88187	1.21713	1.56915
26.5494	0.01406	0.02295	0.0255	0.59262	0.73315	0.80375	0.87892	1.21291	1.56359
26.5685	0.01392	0.02238	0.02535	0.59379	0.73206	0.80715	0.88089	1.21147	1.55858
26.5876	0.01388	0.02222	0.02526	0.5935	0.72165	0.79097	0.88068	1.19484	1.5247
26.6066	0.01387	0.02254	0.02496	0.5932	0.7178	0.79218	0.88048	1.18896	1.51287
26.6257	0.01389	0.02273	0.02494	0.59654	0.71847	0.79086	0.88568	1.1905	1.51057
26.6448	0.01379	0.02285	0.02503	0.59412	0.72036	0.78728	0.88235	1.194	1.52124
26.6639	0.01385	0.02304	0.02512	0.59496	0.72155	0.78706	0.8838	1.1964	1.52462
26.6829	0.01381	0.02283	0.02516	0.5965	0.72319	0.78675	0.88629	1.19957	1.52851
26.702	0.01384	0.02235	0.02522	0.59335	0.72529	0.78919	0.88183	1.2035	1.54125
26.7211	0.01389	0.02191	0.02488	0.59499	0.72284	0.77777	0.88448	1.20007	1.53144
26.7402	0.01381	0.02195	0.02486	0.59643	0.71908	0.7789	0.88686	1.19434	1.51719
26.7592	0.01386	0.02194	0.02506	0.5947	0.71634	0.77931	0.88451	1.19013	1.51104
26.7783	0.01386	0.02151	0.02453	0.59616	0.72082	0.77421	0.8869	1.19798	1.5246
26.7974	0.01384	0.02118	0.02459	0.5955	0.72029	0.77636	0.88616	1.19757	1.52455
26.8165	0.01391	0.021	0.02452	0.59673	0.71776	0.77601	0.88821	1.19387	1.51482
26.8355	0.01387	0.02097	0.02432	0.59236	0.72389	0.78529	0.88193	1.20455	1.5433
26.8546	0.01398	0.02097	0.02424	0.59259	0.72421	0.78278	0.8825	1.20549	1.54463
26.8737	0.01414	0.0208	0.0242	0.59288	0.72048	0.78125	0.88312	1.19964	1.53198
26.8927	0.01412	0.02055	0.02431	0.59296	0.72088	0.78367	0.88343	1.20068	1.53381
26.9118	0.01423	0.02012	0.02397	0.59372	0.72294	0.78213	0.88477	1.20455	1.54031
26.9309	0.01432	0.01976	0.02402	0.58914	0.7178	0.78055	0.87825	1.1965	1.53065
26.95	0.0143	0.01958	0.02405	0.59047	0.7118	0.78287	0.88048	1.18701	1.50887
26.969	0.01428	0.01975	0.0239	0.59166	0.71456	0.79337	0.88248	1.19198	1.51696
26.9881	0.01421	0.01966	0.02395	0.58635	0.71393	0.79674	0.8748	1.1913	1.52362
27.0072	0.01426	0.01936	0.02387	0.582	0.70761	0.79422	0.86856	1.18123	1.50953
27.0263	0.01424	0.01925	0.02409	0.57827	0.70856	0.80105	0.86319	1.18326	1.51934
27.0453	0.0144	0.01905	0.02396	0.58065	0.71107	0.80203	0.86694	1.18789	1.52489
27.0644	0.01453	0.01883	0.02387	0.58468	0.70643	0.81388	0.87321	1.18064	1.50345
27.0835	0.0146	0.01892	0.02416	0.58453	0.70614	0.8162	0.87323	1.18053	1.5032
27.1026	0.01462	0.01897	0.0242	0.58435	0.70805	0.81967	0.8732	1.18416	1.51066
27.1216	0.0144	0.01868	0.02423	0.5871	0.71376	0.8186	0.87756	1.19415	1.52656
27.1407	0.01431	0.01835	0.02439	0.58841	0.71417	0.81799	0.87973	1.19523	1.5265
27.1598	0.01426	0.01849	0.02482	0.5895	0.71422	0.8262	0.88161	1.1957	1.52549
27.1789	0.01411	0.01864	0.0251	0.59057	0.71581	0.83362	0.88345	1.19877	1.52986
27.1979	0.01408	0.01845	0.02508	0.58998	0.71527	0.83719	0.8828	1.19829	1.52955
27.217	0.01405	0.01835	0.02551	0.58676	0.71558	0.84118	0.87819	1.1992	1.53627
27.2361	0.01421	0.01827	0.0257	0.58805	0.71165	0.8417	0.88033	1.19304	1.52139
27.2551	0.01433	0.01794	0.02636	0.58791	0.70943	0.84149	0.8803	1.18977	1.51471
27.2742	0.01423	0.01793	0.02665	0.59025	0.70832	0.85694	0.88404	1.18832	1.50781
27.2933	0.01406	0.01806	0.02695	0.59257	0.71499	0.85273	0.88774	1.19993	1.52773
27.3124	0.01407	0.01834	0.02689	0.59115	0.71177	0.85478	0.88587	1.19495	1.51948
27.3314	0.01409	0.01836	0.02689	0.58995	0.71011	0.85071	0.88433	1.19258	1.51624
27.3505	0.01407	0.01836	0.0272	0.59172	0.7185	0.85185	0.88719	1.20711	1.54301
27.3696	0.01405	0.01847	0.02764	0.59207	0.7132	0.85597	0.88793	1.19867	1.52494
27.3887	0.01396	0.01852	0.02797	0.59188	0.71108	0.84926	0.88788	1.19547	1.51844
27.4077	0.01387	0.01858	0.02824	0.59278	0.7166	0.85236	0.88952	1.20512	1.53651
27.4268	0.01395	0.01848	0.02843	0.59347	0.71048	0.83962	0.89079	1.19523	1.51489
27.4459	0.01395	0.01843	0.02863	0.58908	0.71393	0.85491	0.8845	1.2015	1.53435
27.465	0.01401	0.0184	0.02962	0.58931	0.71492	0.85481	0.8851	1.20361	1.53804
27.484	0.01402	0.01867	0.02973	0.59007	0.71445	0.85454	0.88645	1.2033	1.53599
27.5031	0.01384	0.01868	0.03017	0.58976	0.72173	0.85576	0.88622	1.21599	1.56226
27.5222	0.0137	0.01867	0.03023	0.5918	0.72051	0.85725	0.8895	1.21425	1.55523
27.5412	0.01377	0.01889	0.03031	0.59415	0.71652	0.85477	0.89327	1.20782	1.5381
27.5603	0.01386	0.0187	0.0305	0.59712	0.71267	0.84058	0.89796	1.2018	1.52083
27.5794	0.01393	0.01861	0.03035	0.59652	0.71147	0.8366	0.89728	1.20032	1.51852
27.5985	0.01392	0.01873	0.0306	0.59646	0.71527	0.83524	0.89743	1.20718	1.53241
27.6175	0.0138	0.01855	0.03025	0.59932	0.71644	0.82756	0.90197	1.2095	1.5324
27.6366	0.01346	0.01857	0.0308	0.59764	0.71555	0.82943	0.89971	1.20833	1.53238
27.6557	0.01329	0.01845	0.03067	0.59334	0.71727	0.82296	0.89348	1.21156	1.54555
27.6748	0.01323	0.01829	0.0305	0.59574	0.71583	0.82396	0.8973	1.20945	1.53721
27.6938	0.01317	0.01837	0.03046	0.595	0.71109	0.81948	0.8964	1.20182	1.52252
27.7129	0.01323	0.01835	0.0305	0.59838	0.70436	0.81864	0.90179	1.19086	1.49439
27.732	0.0133	0.01824	0.03046	0.59881	0.70802	0.8171	0.90267	1.19746	1.50699
27.7511	0.01339	0.01798	0.03	0.59836	0.70769	0.80609	0.90225	1.19728	1.50705
27.7701	0.01335	0.01762	0.02982	0.59745	0.7033	0.80867	0.90108	1.1903	1.49398
27.7892	0.01333	0.01753	0.02969	0.59682	0.70542	0.81455	0.9003	1.1943	1.503
27.8083	0.01339	0.01753	0.02917	0.59749	0.7025	0.80944	0.90153	1.18971	1.4923
27.8273	0.01324	0.01771	0.02905	0.59751	0.70394	0.8153	0.90187	1.19248	1.49763
27.8464	0.01304	0.01821	0.0287	0.59887	0.7084	0.81403	0.90422	1.20046	1.51151
27.8655	0.01312	0.01837	0.02873	0.59474	0.70682	0.79953	0.89826	1.19816	1.51306
27.8846	0.01312	0.01837	0.02855	0.59416	0.6987	0.80038	0.89761	1.18486	1.48647
27.9036	0.01318	0.01817	0.02869	0.59379	0.70701	0.79956	0.89724	1.19939	1.51665
27.9227	0.0131	0.01826	0.02879	0.59121	0.71397	0.79834	0.89355	1.21157	1.54549
27.9418	0.01302	0.01823	0.0285	0.59141	0.70856	0.80022	0.89408	1.20284	1.52704
27.9609	0.01304	0.01804	0.02856	0.58871	0.71212	0.79377	0.89023	1.20934	1.54441
27.9799	0.01316	0.01817	0.02861	0.58762	0.71105	0.79306	0.8888	1.20791	1.54298
27.999	0.01331	0.01817	0.02829	0.58604	0.70753	0.7888	0.88663	1.2024	1.53395
28.0181	0.01337	0.01834	0.02831	0.58679	0.7093	0.7918	0.88799	1.20575	1.53939
28.0372	0.01338	0.01856	0.02821	0.58763	0.70264	0.77655	0.8895	1.1948	1.51536
28.0562	0.01321	0.01858	0.02737	0.5862	0.70356	0.77745	0.88761	1.19672	1.52128
28.0753	0.01324	0.01836	0.02728	0.58677	0.70096	0.77394	0.88876	1.19269	1.51182
28.0944	0.01341	0.01864	0.027	0.58716	0.69224	0.77412	0.88959	1.17838	1.48161
28.1135	0.01349	0.01897	0.02675	0.58965	0.69347	0.77311	0.8936	1.18086	1.48249
28.1325	0.01354	0.01894	0.02691	0.58579	0.69966	0.77865	0.88797	1.19178	1.51079
28.1516	0.01339	0.01906	0.02688	0.58562	0.6989	0.78207	0.88792	1.19078	1.50879
28.1707	0.01328	0.01901	0.02718	0.58612	0.69498	0.77931	0.88888	1.18438	1.49464
28.1897	0.01323	0.01896	0.02737	0.58352	0.69451	0.78139	0.88515	1.18395	1.4977
28.2088	0.0133	0.01913	0.02781	0.58152	0.6907	0.7848	0.88235	1.17789	1.48821
28.2279	0.01334	0.01902	0.02743	0.57975	0.68799	0.7801	0.87988	1.17373	1.48228
28.247	0.0133	0.01913	0.02769	0.57711	0.68413	0.77497	0.8761	1.16764	1.47377
28.266	0.01334	0.01906	0.02781	0.57412	0.68986	0.77221	0.87182	1.17785	1.49918
28.2851	0.01348	0.01884	0.02809	0.57946	0.69317	0.77428	0.88019	1.18388	1.50275
28.3042	0.01376	0.01891	0.02823	0.57269	0.69256	0.77488	0.87016	1.18316	1.51181
28.3233	0.01382	0.01925	0.02844	0.57253	0.6899	0.7777	0.87012	1.17902	1.50336
28.3423	0.01397	0.01935	0.02858	0.57117	0.69145	0.77921	0.86828	1.18207	1.51154
28.3614	0.01401	0.01938	0.02852	0.57096	0.69861	0.77111	0.8682	1.1948	1.53773
28.3805	0.01386	0.01944	0.0288	0.57107	0.6985	0.7589	0.86865	1.1951	1.53788
28.3996	0.01367	0.01915	0.02922	0.57548	0.69984	0.75961	0.87564	1.19777	1.536
28.4186	0.01354	0.01876	0.02911	0.57125	0.6983	0.75572	0.86943	1.19549	1.53785
28.4377	0.01341	0.01814	0.02873	0.56874	0.69307	0.76405	0.8658	1.18695	1.52416
28.4568	0.01328	0.01812	0.02825	0.56946	0.69646	0.76909	0.86709	1.19314	1.53549
28.4758	0.01335	0.01811	0.02803	0.56883	0.69622	0.76827	0.86634	1.19315	1.53631
28.4949	0.01312	0.01801	0.02783	0.56879	0.6891	0.77181	0.8665	1.18151	1.51227
28.514	0.01315	0.01786	0.02791	0.56964	0.68117	0.77383	0.86801	1.1684	1.48381
28.5331	0.01321	0.01777	0.02805	0.57054	0.67847	0.7745	0.86966	1.16416	1.47338
28.5521	0.01324	0.01776	0.02776	0.57403	0.67416	0.78063	0.8752	1.15711	1.45311
28.5712	0.01317	0.01751	0.02739	0.57579	0.67643	0.77967	0.87814	1.16144	1.4589
28.5903	0.01312	0.01739	0.02755	0.57538	0.67403	0.77933	0.87776	1.15781	1.45186
28.6094	0.01288	0.01717	0.02752	0.5752	0.67446	0.77727	0.87774	1.15901	1.45435
28.6284	0.01279	0.01694	0.02777	0.57645	0.67888	0.78197	0.87987	1.16697	1.46843
28.6475	0.01288	0.01697	0.02786	0.57557	0.678	0.78095	0.87872	1.16581	1.46726
28.6666	0.01286	0.01682	0.0276	0.57543	0.68052	0.7819	0.87869	1.17046	1.47683
28.6857	0.01281	0.0164	0.02747	0.57394	0.68069	0.78046	0.87661	1.17111	1.48034
28.7047	0.01276	0.01601	0.02759	0.57135	0.68552	0.78268	0.87295	1.17992	1.50223
28.7238	0.0127	0.01587	0.02769	0.57175	0.68188	0.77647	0.87381	1.17412	1.48944
28.7429	0.01277	0.01583	0.02811	0.57062	0.68111	0.77762	0.87238	1.17317	1.48899
28.7619	0.01286	0.01596	0.02803	0.57354	0.68107	0.78416	0.87715	1.17347	1.48461
28.781	0.01289	0.01585	0.02786	0.57681	0.68065	0.78383	0.8824	1.17317	1.47849
28.8001	0.0129	0.01575	0.02746	0.57828	0.68199	0.78031	0.88487	1.17586	1.48139
28.8192	0.01296	0.01589	0.02728	0.58231	0.68438	0.78815	0.89125	1.18035	1.48392
28.8382	0.013	0.01594	0.02698	0.5841	0.6849	0.78769	0.89419	1.18167	1.48352
28.8573	0.01308	0.01621	0.02678	0.58582	0.68598	0.79298	0.89702	1.18403	1.48539
28.8764	0.01309	0.01633	0.0265	0.58391	0.68347	0.78919	0.89435	1.18014	1.48022
28.8955	0.01292	0.01638	0.02639	0.58509	0.68486	0.7877	0.89639	1.18295	1.48384
28.9145	0.01279	0.01605	0.02605	0.58604	0.68421	0.78906	0.8981	1.18218	1.48046
28.9336	0.01259	0.01586	0.02598	0.58951	0.68957	0.78807	0.90368	1.19182	1.49437
28.9527	0.01259	0.01572	0.02604	0.58934	0.68235	0.78748	0.90363	1.17976	1.4697
28.9718	0.01272	0.01555	0.02576	0.59066	0.67921	0.78718	0.90588	1.17479	1.45714
28.9908	0.01294	0.01553	0.02529	0.58876	0.6774	0.78596	0.90321	1.17206	1.45436
29.0099	0.01334	0.01552	0.0254	0.58942	0.67991	0.77921	0.90444	1.17683	1.46283
29.029	0.0136	0.01552	0.02536	0.59078	0.68567	0.77382	0.90677	1.18725	1.48175
29.0481	0.01383	0.0155	0.0258	0.58955	0.68266	0.76815	0.90515	1.18242	1.47356
29.0671	0.01393	0.01534	0.02584	0.58821	0.68912	0.76663	0.90332	1.19401	1.49923
29.0862	0.014	0.01536	0.02582	0.58938	0.6856	0.7579	0.90536	1.18832	1.48542
29.1053	0.014	0.01539	0.02567	0.59159	0.68463	0.75947	0.90897	1.18702	1.47898
29.1243	0.01403	0.01568	0.02535	0.58798	0.68819	0.75835	0.90364	1.1937	1.49826
29.1434	0.01401	0.01569	0.02532	0.58596	0.6909	0.75139	0.90075	1.19887	1.51189
29.1625	0.01407	0.01572	0.0254	0.58733	0.69004	0.75177	0.90311	1.19775	1.50712
29.1816	0.01404	0.01568	0.02548	0.58926	0.69799	0.75872	0.90632	1.2119	1.53276
29.2006	0.01401	0.0158	0.02535	0.58724	0.69503	0.75855	0.90343	1.20709	1.52593
29.2197	0.01394	0.01589	0.02518	0.58386	0.69005	0.7543	0.89845	1.19887	1.5143
29.2388	0.01377	0.01578	0.02501	0.58773	0.69225	0.75502	0.90463	1.20312	1.51652
29.2579	0.01366	0.016	0.0251	0.58529	0.69044	0.75407	0.90113	1.20037	1.51457
29.2769	0.01363	0.01598	0.02507	0.58776	0.68996	0.75418	0.90518	1.19993	1.50942
29.296	0.01366	0.01598	0.02525	0.58476	0.68388	0.75308	0.90082	1.18976	1.49315
29.3151	0.01355	0.01605	0.02505	0.58381	0.68421	0.75823	0.89956	1.19076	1.49653
29.3342	0.01353	0.01606	0.0243	0.58278	0.68495	0.7554	0.89817	1.19245	1.50144
29.3532	0.01357	0.0161	0.02401	0.58065	0.68469	0.74637	0.89512	1.19236	1.50447
29.3723	0.0136	0.01659	0.02407	0.58042	0.68286	0.75538	0.89497	1.18956	1.49888
29.3914	0.01352	0.01673	0.02405	0.5818	0.68724	0.75713	0.89734	1.1976	1.51287
29.4104	0.01337	0.01662	0.02405	0.57837	0.68811	0.7498	0.89232	1.19954	1.52212
29.4295	0.01343	0.01662	0.0241	0.57721	0.69181	0.75012	0.89074	1.20644	1.53793
29.4486	0.01326	0.01641	0.02412	0.57596	0.68611	0.74247	0.88907	1.19692	1.52015
29.4677	0.01325	0.01632	0.02419	0.57616	0.69515	0.74217	0.88967	1.21308	1.55267
29.4867	0.01312	0.01616	0.0242	0.57579	0.69528	0.74611	0.88934	1.21363	1.55412
29.5058	0.01312	0.0162	0.02442	0.57601	0.6992	0.74969	0.88994	1.22087	1.56835
29.5249	0.01315	0.01625	0.02427	0.57467	0.69141	0.7489	0.88816	1.20775	1.54331
29.544	0.01315	0.01628	0.02409	0.57641	0.69246	0.75112	0.89106	1.21001	1.54491
29.563	0.01315	0.01635	0.02463	0.57406	0.69333	0.75151	0.88764	1.212	1.55257
29.5821	0.01313	0.01662	0.02487	0.57223	0.69473	0.75088	0.88506	1.21484	1.5611
29.6012	0.01285	0.01676	0.02465	0.5764	0.69217	0.74813	0.89173	1.21075	1.54571
29.6203	0.01269	0.01686	0.02463	0.5763	0.68599	0.74894	0.8918	1.20033	1.52429
29.6393	0.01257	0.01672	0.0242	0.57917	0.68608	0.74832	0.89647	1.20085	1.52046
29.6584	0.01254	0.01702	0.02412	0.58238	0.68033	0.75538	0.90168	1.19127	1.49534
29.6775	0.0125	0.01706	0.02433	0.58222	0.67952	0.75566	0.90169	1.19026	1.49327
29.6966	0.0125	0.01716	0.02458	0.57863	0.67972	0.75444	0.89637	1.19096	1.50028
29.7156	0.01246	0.01684	0.0246	0.57979	0.67478	0.75202	0.89839	1.1826	1.48103
29.7347	0.01248	0.01673	0.02452	0.5801	0.67119	0.75273	0.89908	1.17666	1.46813
29.7538	0.01246	0.0166	0.02437	0.57717	0.66847	0.76155	0.8948	1.17231	1.46369
29.7728	0.01251	0.01663	0.02419	0.57566	0.66318	0.75286	0.89271	1.16366	1.44815
29.7919	0.01269	0.01666	0.02403	0.57691	0.66538	0.75054	0.89486	1.16796	1.45471
29.811	0.01272	0.01681	0.02402	0.5797	0.66797	0.74795	0.89943	1.17286	1.45996
29.8301	0.01276	0.01705	0.02396	0.57667	0.66388	0.75054	0.89502	1.16602	1.45056
29.8491	0.01277	0.01707	0.02417	0.5777	0.66748	0.75026	0.89685	1.17272	1.46239
29.8682	0.01272	0.01703	0.02415	0.57786	0.67164	0.74865	0.89733	1.18045	1.47773
29.8873	0.01262	0.01702	0.02421	0.57724	0.67289	0.75036	0.89655	1.18305	1.48388
29.9064	0.01269	0.01689	0.0243	0.57982	0.67051	0.75427	0.90076	1.17926	1.47169
29.9254	0.01272	0.01678	0.02451	0.57831	0.67084	0.75217	0.89862	1.18023	1.47592
29.9445	0.01263	0.01664	0.02488	0.57742	0.67168	0.75235	0.89749	1.18208	1.4809
29.9636	0.01256	0.01622	0.02466	0.57766	0.66984	0.74048	0.89815	1.17926	1.47442
29.9827	0.01257	0.01599	0.02458	0.57737	0.6652	0.74057	0.89798	1.17155	1.4588
30.0017	0.01266	0.01599	0.02445	0.57708	0.66375	0.74689	0.89773	1.1694	1.45465
30.0208	0.0126	0.01596	0.02451	0.57791	0.66124	0.74671	0.89925	1.16539	1.44484
30.0399	0.01267	0.01629	0.02443	0.5829	0.66107	0.74657	0.90726	1.16545	1.43655
30.0589	0.01272	0.01658	0.02433	0.5804	0.64958	0.74851	0.90364	1.14569	1.39983
30.078	0.01279	0.01664	0.02443	0.57975	0.6484	0.74454	0.90286	1.14403	1.39727
30.0971	0.01295	0.01654	0.02464	0.57768	0.6435	0.74058	0.89986	1.1359	1.38375
30.1162	0.01295	0.01652	0.02468	0.57539	0.6473	0.74441	0.89653	1.14303	1.40185
30.1352	0.01291	0.01659	0.02468	0.57733	0.64573	0.75081	0.8998	1.1406	1.39344
30.1543	0.01284	0.01657	0.02421	0.58075	0.64667	0.75413	0.90537	1.14266	1.39183
30.1734	0.01274	0.01641	0.02424	0.57799	0.64664	0.75503	0.90132	1.14298	1.39672
30.1925	0.01271	0.01635	0.02465	0.57361	0.64748	0.76786	0.89478	1.14492	1.40756
30.2115	0.01274	0.0163	0.02486	0.57474	0.64869	0.76929	0.8968	1.14757	1.41087
30.2306	0.01289	0.01625	0.02509	0.57524	0.64986	0.76844	0.89781	1.15007	1.41495
30.2497	0.0128	0.01585	0.02535	0.57073	0.64859	0.76445	0.89097	1.14821	1.41831
30.2688	0.01279	0.01568	0.02519	0.5737	0.64827	0.76437	0.89582	1.14797	1.41273
30.2878	0.01275	0.0154	0.02491	0.57624	0.6473	0.75991	0.90002	1.14662	1.40554
30.3069	0.01267	0.01543	0.02495	0.57757	0.6461	0.75752	0.90235	1.1449	1.39957
30.326	0.01268	0.01544	0.02509	0.57809	0.64818	0.75855	0.90345	1.149	1.40683
30.345	0.01273	0.01558	0.02523	0.5792	0.65314	0.74973	0.90546	1.15823	1.42364
30.3641	0.01258	0.01561	0.02534	0.57726	0.6497	0.75102	0.90265	1.15255	1.41494
30.3832	0.0124	0.01553	0.02589	0.57836	0.65279	0.75146	0.90456	1.15846	1.42506
30.4023	0.01241	0.01524	0.02601	0.57822	0.65239	0.75061	0.90458	1.15817	1.42445
30.4213	0.01251	0.01504	0.02595	0.57593	0.65318	0.75291	0.90123	1.15996	1.43163
30.4404	0.01251	0.01489	0.02575	0.57594	0.64968	0.75364	0.90148	1.15428	1.41971
30.4595	0.01268	0.01495	0.02556	0.57259	0.6434	0.76102	0.89651	1.14359	1.40301
30.4786	0.01275	0.015	0.02514	0.57377	0.64274	0.75809	0.89859	1.14282	1.39925
30.4976	0.01271	0.01494	0.02487	0.57078	0.6468	0.74817	0.89415	1.15044	1.41954
30.5167	0.0126	0.01491	0.02486	0.57485	0.64593	0.74954	0.90076	1.14924	1.41015
30.5358	0.01257	0.01492	0.02459	0.5762	0.65054	0.75689	0.90308	1.15788	1.42542
30.5549	0.01257	0.01483	0.02468	0.57437	0.65075	0.76613	0.90046	1.15863	1.4297
30.5739	0.01275	0.01499	0.0248	0.57081	0.65059	0.7643	0.89512	1.15876	1.43557
30.593	0.01291	0.01499	0.0249	0.57608	0.65017	0.7585	0.90365	1.15849	1.42606
30.6121	0.01288	0.01503	0.02518	0.58081	0.64707	0.75892	0.91134	1.1534	1.40757
30.6312	0.01282	0.01478	0.02525	0.57731	0.64782	0.77199	0.90614	1.15511	1.41653
30.6502	0.01263	0.01446	0.02549	0.57654	0.65429	0.77	0.90517	1.16704	1.44201
30.6693	0.01259	0.01443	0.02535	0.57663	0.65742	0.77423	0.90551	1.17302	1.45391
30.6884	0.01245	0.01456	0.025	0.57801	0.66461	0.76914	0.9079	1.18631	1.47865
30.7074	0.01257	0.01457	0.02513	0.57849	0.66417	0.76254	0.90886	1.18601	1.47701
30.7265	0.01263	0.01467	0.02547	0.57456	0.6664	0.75369	0.90292	1.19039	1.49224
30.7456	0.01258	0.0146	0.02583	0.57103	0.66097	0.75082	0.89761	1.18109	1.47874
30.7647	0.01247	0.01456	0.02576	0.574	0.65805	0.74878	0.9025	1.17622	1.46364
30.7837	0.01255	0.01448	0.02545	0.57228	0.65568	0.73675	0.9	1.17233	1.45828
30.8028	0.01265	0.01443	0.02526	0.57108	0.65441	0.73311	0.89836	1.17044	1.45612
30.8219	0.0125	0.01459	0.02548	0.56708	0.65727	0.73315	0.89234	1.17603	1.4739
30.841	0.01248	0.01497	0.02523	0.56903	0.65736	0.72937	0.89565	1.17659	1.47158
30.86	0.01254	0.01518	0.0253	0.56477	0.6581	0.73625	0.88922	1.17836	1.48196
30.8791	0.01265	0.01538	0.02512	0.56601	0.6633	0.73869	0.89142	1.18815	1.49971
30.8982	0.01274	0.01537	0.02498	0.56611	0.66511	0.74398	0.89181	1.19175	1.50669
30.9173	0.0127	0.0154	0.02486	0.56868	0.6642	0.74377	0.89605	1.19052	1.49973
30.9363	0.01261	0.01532	0.02489	0.5658	0.65945	0.74252	0.89171	1.1824	1.48763
30.9554	0.01269	0.01536	0.02484	0.56741	0.65756	0.73928	0.89447	1.17936	1.47849
30.9745	0.01266	0.01543	0.02441	0.56521	0.65971	0.74727	0.89127	1.18372	1.4908
30.9935	0.01262	0.01547	0.02435	0.56146	0.66002	0.74854	0.88561	1.18476	1.49887
31.0126	0.01245	0.01553	0.02445	0.56344	0.66149	0.74886	0.88894	1.18786	1.50173
31.0317	0.01243	0.01545	0.02436	0.56392	0.66112	0.75025	0.88997	1.18759	1.50009
31.0508	0.01227	0.01536	0.02464	0.56355	0.66818	0.74533	0.88962	1.20066	1.52726
31.0698	0.01232	0.01541	0.02474	0.5665	0.66804	0.74384	0.89456	1.20083	1.52242
31.0889	0.01239	0.01548	0.02491	0.56893	0.67173	0.74647	0.89861	1.20794	1.53273
31.108	0.01262	0.01559	0.02496	0.56375	0.67149	0.74771	0.89065	1.20793	1.54108
31.1271	0.01267	0.01562	0.02499	0.55972	0.67395	0.7409	0.8845	1.21291	1.55774
31.1461	0.01273	0.01567	0.02488	0.55916	0.67604	0.73296	0.88382	1.21709	1.56703
31.1652	0.01253	0.01576	0.02516	0.55932	0.67653	0.73126	0.88428	1.21836	1.56914
31.1843	0.01226	0.0157	0.02507	0.55518	0.68039	0.72945	0.87802	1.22573	1.59083
31.2034	0.01221	0.01557	0.0248	0.5497	0.68136	0.73103	0.86963	1.22788	1.60405
31.2224	0.01217	0.01547	0.02472	0.54761	0.68311	0.71814	0.8666	1.2315	1.61466
31.2415	0.01212	0.0157	0.02459	0.55118	0.67809	0.72575	0.87253	1.22292	1.59083
31.2606	0.01221	0.01576	0.02465	0.55305	0.67418	0.72397	0.87574	1.21627	1.57382
31.2796	0.01233	0.01593	0.02487	0.55088	0.66574	0.73132	0.87253	1.20143	1.54677
31.2987	0.01222	0.0159	0.02491	0.55183	0.66696	0.73727	0.87429	1.20409	1.55038
31.3178	0.01214	0.01586	0.02455	0.55112	0.66298	0.74322	0.87339	1.19738	1.53757
31.3369	0.01214	0.01582	0.02416	0.54924	0.66453	0.74254	0.87061	1.20064	1.54717
31.3559	0.01207	0.01577	0.02392	0.54686	0.66642	0.74928	0.86708	1.20444	1.55868
31.375	0.01188	0.0159	0.02373	0.54977	0.66939	0.75263	0.87191	1.21021	1.56543
31.3941	0.01161	0.01591	0.02379	0.5515	0.66841	0.75362	0.87491	1.20881	1.5594
31.4132	0.0115	0.01589	0.02336	0.55211	0.66409	0.75212	0.8761	1.20143	1.54302
31.4322	0.01162	0.01558	0.02358	0.55159	0.66634	0.75081	0.87552	1.20593	1.55286
31.4513	0.01171	0.01541	0.02351	0.55295	0.66539	0.74488	0.87794	1.20459	1.54757
31.4704	0.01171	0.01524	0.02385	0.54966	0.66561	0.74825	0.87297	1.2054	1.55446
31.4895	0.01183	0.01532	0.02414	0.54823	0.6723	0.74573	0.87093	1.21792	1.58226
31.5085	0.01189	0.01523	0.02429	0.54868	0.66891	0.74288	0.87191	1.21215	1.56941
31.5276	0.01192	0.0152	0.02416	0.55166	0.66934	0.74228	0.87688	1.21339	1.56672
31.5467	0.0119	0.01518	0.02441	0.55189	0.67002	0.74299	0.87749	1.21502	1.56942
31.5658	0.01199	0.01523	0.02455	0.55111	0.66242	0.73787	0.87646	1.20168	1.54316
31.5848	0.01207	0.01532	0.02468	0.55598	0.66183	0.73707	0.88443	1.20093	1.53326
31.6039	0.01212	0.01535	0.02462	0.5547	0.66423	0.72961	0.8826	1.20565	1.54484
31.623	0.01208	0.01546	0.02451	0.55454	0.67146	0.72627	0.88255	1.21919	1.57266
31.642	0.01206	0.01545	0.02428	0.55384	0.66469	0.7236	0.88161	1.20738	1.54944
31.6611	0.01194	0.01541	0.02428	0.55178	0.66548	0.72333	0.87858	1.20927	1.5565
31.6802	0.0119	0.01554	0.02422	0.54967	0.65858	0.72168	0.87549	1.19721	1.53501
31.6993	0.01189	0.01535	0.02405	0.55092	0.66021	0.7183	0.87775	1.20051	1.53941
31.7183	0.01195	0.01525	0.02396	0.55552	0.65207	0.71685	0.88533	1.18613	1.50197
31.7374	0.01192	0.01516	0.02393	0.55606	0.65303	0.7215	0.88643	1.18828	1.50521
31.7565	0.01189	0.01493	0.02365	0.55571	0.65395	0.72253	0.88608	1.19037	1.50987
31.7756	0.01198	0.01499	0.02363	0.55439	0.65105	0.7231	0.88418	1.18559	1.50207
31.7946	0.01198	0.01525	0.02355	0.55431	0.64995	0.72074	0.88424	1.18398	1.49871
31.8137	0.012	0.01565	0.02356	0.56036	0.64626	0.7194	0.89411	1.17762	1.4753
31.8328	0.012	0.0155	0.02343	0.555	0.65098	0.7165	0.88578	1.1866	1.50247
31.8519	0.01189	0.01545	0.02325	0.55453	0.65824	0.72047	0.88529	1.20028	1.53103
31.8709	0.01171	0.01519	0.023	0.55687	0.6624	0.71484	0.88929	1.20834	1.54334
31.89	0.01165	0.01528	0.02277	0.55457	0.66063	0.70957	0.88591	1.20557	1.54123
31.9091	0.01168	0.01521	0.02268	0.55539	0.66353	0.70093	0.88746	1.21115	1.55103
31.9281	0.01167	0.01535	0.02275	0.56333	0.66382	0.70377	0.9004	1.21202	1.53923
31.9472	0.01173	0.01541	0.02276	0.56557	0.66225	0.70064	0.90423	1.20951	1.53005
31.9663	0.01178	0.01531	0.02269	0.56431	0.65895	0.70285	0.90244	1.20388	1.52038
31.9854	0.01183	0.01525	0.02252	0.56147	0.6598	0.70088	0.89814	1.20587	1.52898
32.0053	0.01196	0.01517	0.02242	0.56082	0.65831	0.71354	0.89729	1.20353	1.52508
32.0282	0.01171	0.0154	0.02236	0.56071	0.65584	0.71465	0.8973	1.1994	1.51661
32.0511	0.01153	0.01566	0.02249	0.56111	0.66199	0.71682	0.89815	1.21104	1.53958
32.074	0.01143	0.01575	0.0222	0.56132	0.65769	0.71135	0.8987	1.20363	1.5238
32.0969	0.0112	0.01563	0.02188	0.56312	0.65304	0.70901	0.90183	1.19563	1.50412
32.1198	0.0111	0.01568	0.02148	0.56048	0.65344	0.70945	0.8979	1.19675	1.51054
32.1427	0.01118	0.01577	0.02152	0.5574	0.652	0.70973	0.89324	1.19447	1.51077
32.1655	0.01118	0.01574	0.02133	0.55786	0.6527	0.7094	0.8942	1.19614	1.51317
32.1884	0.01111	0.0156	0.02129	0.56007	0.65689	0.70536	0.89795	1.20419	1.52574
32.2113	0.01102	0.01554	0.02104	0.55852	0.65676	0.70508	0.89571	1.20438	1.52849
32.2342	0.01095	0.01542	0.02147	0.55669	0.65399	0.70887	0.89297	1.19977	1.52192
32.2571	0.01093	0.01532	0.02171	0.55683	0.64553	0.7111	0.89345	1.18475	1.49062
32.28	0.01097	0.01548	0.02218	0.55775	0.65374	0.71994	0.89515	1.20025	1.52061
32.3029	0.01098	0.01548	0.02241	0.55665	0.65442	0.71889	0.89363	1.2019	1.52558
32.3258	0.01097	0.01543	0.02248	0.55539	0.65531	0.71866	0.89184	1.20394	1.53165
32.3487	0.01078	0.01545	0.02257	0.55899	0.65562	0.72071	0.89783	1.20498	1.52749
32.3715	0.01057	0.01541	0.02256	0.55624	0.65994	0.72014	0.89365	1.21337	1.54908
32.3944	0.01053	0.01544	0.02259	0.55531	0.65985	0.72069	0.89236	1.21363	1.55095
32.4173	0.01062	0.01561	0.02247	0.5552	0.6586	0.72171	0.89239	1.21169	1.54696
32.4402	0.01066	0.01569	0.02245	0.55481	0.65823	0.72958	0.89199	1.21138	1.54675
32.4631	0.01061	0.01561	0.0225	0.55643	0.66106	0.72987	0.89482	1.21706	1.55541
32.486	0.01054	0.01529	0.02257	0.55465	0.66251	0.74094	0.89224	1.22015	1.56445
32.5089	0.01045	0.01546	0.02311	0.55507	0.66167	0.73419	0.89313	1.21911	1.56139
32.5318	0.0103	0.01547	0.02337	0.55559	0.65453	0.72542	0.89418	1.2064	1.53422
32.5546	0.01022	0.01544	0.02359	0.55411	0.65259	0.73151	0.89203	1.2032	1.52993
32.5775	0.01029	0.01536	0.02387	0.55228	0.64965	0.73208	0.88929	1.19814	1.52243
32.6004	0.0103	0.0153	0.02395	0.55041	0.6509	0.74244	0.88649	1.20092	1.53108
32.6233	0.01036	0.01519	0.02409	0.54461	0.6516	0.73947	0.87739	1.20267	1.54421
32.6462	0.01041	0.01518	0.02432	0.54558	0.65143	0.73767	0.87921	1.20273	1.54242
32.6691	0.0104	0.01525	0.02482	0.5475	0.65337	0.73202	0.88256	1.20669	1.54702
32.692	0.01041	0.0154	0.02499	0.54921	0.654	0.72897	0.88559	1.20827	1.54709
32.7149	0.01037	0.01541	0.02548	0.54897	0.6546	0.7156	0.88541	1.20976	1.55031
32.7378	0.01044	0.0153	0.02531	0.54819	0.65324	0.71496	0.88439	1.20765	1.54708
32.7606	0.01052	0.01507	0.0251	0.55069	0.6477	0.71179	0.88868	1.19792	1.52262
32.7835	0.01051	0.01509	0.02545	0.55428	0.64943	0.71063	0.89471	1.20154	1.52372
32.8064	0.01051	0.01517	0.02551	0.55283	0.6476	0.70893	0.89263	1.19856	1.51979
32.8293	0.01052	0.01528	0.02578	0.55311	0.6524	0.7072	0.89334	1.20781	1.538
32.8522	0.01041	0.01525	0.0256	0.55292	0.65762	0.70738	0.89325	1.2178	1.55858
32.8751	0.01046	0.01517	0.02558	0.55323	0.65544	0.70959	0.89406	1.21409	1.55012
32.898	0.01052	0.01517	0.0256	0.55197	0.6503	0.71205	0.8923	1.20501	1.53336
32.9209	0.01053	0.01513	0.02578	0.55055	0.65702	0.71202	0.89029	1.21797	1.56202
32.9437	0.01053	0.01514	0.02544	0.55331	0.6584	0.70948	0.895	1.22095	1.5632
32.9666	0.01051	0.01514	0.02522	0.55331	0.6568	0.70857	0.89523	1.21834	1.55759
32.9895	0.01052	0.01499	0.02475	0.55518	0.65398	0.70891	0.89848	1.21359	1.54446
33.0124	0.01054	0.015	0.02435	0.55575	0.65149	0.71032	0.89966	1.20937	1.53457
33.0353	0.01044	0.01497	0.02411	0.55923	0.65078	0.71453	0.90549	1.20848	1.52662
33.0582	0.01046	0.01524	0.02394	0.55636	0.64823	0.71299	0.90108	1.20411	1.52229
33.0811	0.01047	0.01556	0.02381	0.55902	0.64793	0.71143	0.90565	1.204	1.51727
33.104	0.01042	0.01563	0.02372	0.55989	0.64578	0.70746	0.90729	1.20041	1.50818
33.1269	0.01031	0.01545	0.02372	0.55996	0.65351	0.70822	0.90763	1.21525	1.53826
33.1497	0.01017	0.01542	0.02377	0.55959	0.65062	0.69923	0.90723	1.21027	1.52846
33.1726	0.01019	0.01525	0.02384	0.55587	0.65424	0.70699	0.90145	1.21745	1.54924
33.1955	0.01024	0.01508	0.0239	0.55175	0.65879	0.69657	0.89505	1.22634	1.57419
33.2184	0.01041	0.01491	0.0237	0.5509	0.65651	0.69648	0.89389	1.22258	1.56771
33.2413	0.01056	0.01482	0.02339	0.55	0.65831	0.69608	0.89271	1.22633	1.57663
33.2642	0.01075	0.01481	0.02319	0.54999	0.65591	0.68771	0.89293	1.22226	1.56806
33.2871	0.01078	0.01473	0.02295	0.55193	0.65591	0.68562	0.89633	1.22263	1.56525
33.31	0.01084	0.01477	0.02293	0.55506	0.65186	0.67811	0.90165	1.21542	1.54488
33.3328	0.01079	0.01476	0.02291	0.55473	0.64765	0.67845	0.90134	1.20789	1.52977
33.3557	0.01073	0.01498	0.02299	0.55318	0.65416	0.68512	0.89906	1.22043	1.55787
33.3786	0.01074	0.01485	0.02266	0.55311	0.6562	0.68627	0.89917	1.22473	1.56656
33.4015	0.01071	0.01484	0.02295	0.54978	0.65878	0.68853	0.89399	1.23003	1.58288
33.4244	0.01061	0.01488	0.02257	0.55174	0.66006	0.6919	0.8974	1.23282	1.58501
33.4473	0.01054	0.01477	0.02261	0.55392	0.66556	0.69243	0.90117	1.24346	1.60287
33.4702	0.01048	0.01476	0.02268	0.55131	0.66582	0.69471	0.89723	1.24428	1.60868
33.4931	0.01049	0.01465	0.02247	0.54893	0.66344	0.69429	0.89361	1.24021	1.60414
33.5159	0.01051	0.01469	0.02253	0.54768	0.66428	0.69619	0.89179	1.24221	1.61016
33.5388	0.01053	0.01468	0.02256	0.54695	0.66446	0.69804	0.89084	1.24305	1.61286
33.5617	0.0105	0.01467	0.02279	0.54716	0.66277	0.6979	0.89139	1.2404	1.60686
33.5846	0.01049	0.015	0.0231	0.54353	0.66894	0.69516	0.8857	1.25237	1.63737
33.6075	0.01057	0.01511	0.02301	0.54278	0.66935	0.69818	0.88469	1.25342	1.64059
33.6304	0.01056	0.01512	0.0229	0.54164	0.66392	0.69645	0.88303	1.24369	1.62238
33.6533	0.01067	0.01515	0.02297	0.54178	0.66335	0.69559	0.88348	1.24306	1.62061
33.6762	0.01076	0.01553	0.02306	0.54211	0.66321	0.70347	0.88427	1.24317	1.62002
33.6991	0.01077	0.01584	0.02324	0.54294	0.65879	0.69801	0.88589	1.23537	1.60232
33.7219	0.01077	0.01603	0.02331	0.54152	0.65798	0.69799	0.88383	1.23422	1.60213
33.7448	0.01082	0.0163	0.0234	0.53977	0.65777	0.69385	0.88124	1.23418	1.60476
33.7677	0.0109	0.01636	0.02341	0.5395	0.65975	0.6952	0.88104	1.23831	1.61344
33.7906	0.01099	0.01631	0.0234	0.53931	0.65949	0.69773	0.88094	1.2383	1.61353
33.8135	0.01098	0.01644	0.02334	0.54152	0.65893	0.69373	0.88475	1.23766	1.60821
33.8364	0.01101	0.01653	0.02348	0.54404	0.6514	0.69468	0.88909	1.22403	1.57573
33.8593	0.01105	0.01659	0.02334	0.54356	0.65224	0.69461	0.88854	1.22599	1.58031
33.8822	0.01111	0.01674	0.02313	0.54622	0.6451	0.68575	0.89313	1.21306	1.54899
33.905	0.01115	0.01676	0.02318	0.54696	0.63832	0.68551	0.89457	1.20077	1.52228
33.9279	0.01112	0.01672	0.02293	0.54961	0.63858	0.68517	0.89915	1.20168	1.51933
33.9508	0.01102	0.01673	0.02297	0.55109	0.63747	0.68735	0.90181	1.19999	1.51307
33.9737	0.01089	0.01685	0.02292	0.55094	0.63665	0.68936	0.90178	1.19882	1.51071
33.9966	0.0108	0.01708	0.02291	0.55253	0.63805	0.69023	0.90461	1.20188	1.514
34.0195	0.01078	0.01719	0.02297	0.55133	0.639	0.68939	0.90287	1.2041	1.52039
34.0424	0.0109	0.0172	0.02274	0.55121	0.64443	0.68817	0.9029	1.21482	1.54233
34.0653	0.01099	0.01704	0.02273	0.55033	0.64003	0.67908	0.90173	1.20705	1.52763
34.0882	0.01095	0.01712	0.02267	0.54828	0.6384	0.68082	0.89866	1.2044	1.52543
34.111	0.01094	0.01701	0.02226	0.5486	0.63383	0.68771	0.89941	1.19616	1.50774
34.1339	0.01089	0.01695	0.02225	0.54793	0.63164	0.68606	0.89854	1.19239	1.50092
34.1568	0.01094	0.01702	0.02219	0.54701	0.62493	0.68663	0.89728	1.18015	1.47716
34.1797	0.01102	0.01703	0.02226	0.55077	0.62861	0.68371	0.90371	1.18761	1.48571
34.2026	0.01103	0.01702	0.02224	0.5496	0.63116	0.68361	0.90202	1.19293	1.49839
34.2255	0.01111	0.01701	0.0221	0.5507	0.63016	0.68299	0.90408	1.19151	1.4933
34.2484	0.01115	0.01695	0.02189	0.54958	0.62518	0.68245	0.90249	1.18248	1.47647
34.2713	0.01118	0.01699	0.0218	0.55329	0.62732	0.68237	0.90884	1.18693	1.47892
34.2941	0.0111	0.01671	0.02153	0.55358	0.6217	0.68276	0.90956	1.17678	1.45737
34.317	0.01093	0.0166	0.02184	0.55511	0.62482	0.68665	0.9123	1.18319	1.46764
34.3399	0.01086	0.01653	0.02238	0.55538	0.62459	0.68911	0.91297	1.18331	1.46716
34.3628	0.01079	0.01653	0.02236	0.55585	0.62191	0.68767	0.91398	1.17868	1.4566
34.3857	0.01076	0.01614	0.02242	0.55419	0.63204	0.67774	0.91147	1.19829	1.49944
34.4086	0.01087	0.01596	0.02227	0.55074	0.62915	0.67325	0.90605	1.19318	1.49467
34.4315	0.01082	0.0157	0.02227	0.55136	0.62945	0.6767	0.9073	1.19417	1.49538
34.4544	0.01077	0.01529	0.02227	0.54955	0.63004	0.67446	0.90456	1.19576	1.50152
34.4773	0.0106	0.01494	0.02234	0.55065	0.62844	0.67893	0.90664	1.19313	1.49394
34.5001	0.01058	0.01487	0.02242	0.54944	0.62616	0.68348	0.90497	1.18924	1.48772
34.523	0.01055	0.01469	0.02246	0.54685	0.62643	0.68492	0.901	1.19013	1.49371
34.5459	0.01058	0.01468	0.02253	0.54465	0.6286	0.68182	0.89763	1.19469	1.5066
34.5688	0.01059	0.01448	0.02268	0.54613	0.62955	0.68175	0.90028	1.19695	1.50845
34.5917	0.01061	0.01423	0.02266	0.54574	0.63594	0.68241	0.89984	1.20956	1.53477
34.6146	0.01056	0.01446	0.02238	0.54424	0.63771	0.68319	0.89759	1.21334	1.54487
34.6375	0.01048	0.01437	0.02229	0.54388	0.64314	0.68332	0.89726	1.22413	1.56735
34.6604	0.01047	0.01436	0.02255	0.54126	0.65327	0.68201	0.89322	1.24382	1.61196
34.6832	0.01041	0.01424	0.02254	0.5412	0.65653	0.67935	0.89338	1.25039	1.62526
34.7061	0.01043	0.01399	0.02282	0.53971	0.65595	0.68199	0.89119	1.24972	1.62617
34.729	0.01039	0.01377	0.02295	0.54003	0.65819	0.67913	0.89197	1.25445	1.63506
34.7519	0.01032	0.01372	0.02297	0.54001	0.65503	0.67793	0.89216	1.24886	1.62339
34.7748	0.0103	0.01373	0.02281	0.53889	0.65371	0.67968	0.89054	1.24668	1.62062
34.7977	0.01043	0.01373	0.02286	0.5378	0.65715	0.67591	0.88896	1.25362	1.63652
34.8206	0.01055	0.01391	0.023	0.53787	0.65768	0.66617	0.8893	1.25505	1.63909
34.8435	0.01062	0.01399	0.02308	0.54305	0.65916	0.6638	0.8981	1.25833	1.63657
34.8664	0.01067	0.01422	0.02302	0.54267	0.66151	0.66414	0.89771	1.26321	1.64698
34.8892	0.01057	0.01463	0.02288	0.53605	0.6561	0.6668	0.88704	1.25326	1.63779
34.9121	0.01055	0.01482	0.02283	0.53578	0.6511	0.67039	0.88683	1.24406	1.61915
34.935	0.01053	0.01482	0.02317	0.53627	0.65027	0.67276	0.88791	1.24284	1.61552
34.9579	0.01058	0.0148	0.02323	0.53877	0.6503	0.67112	0.8923	1.24333	1.61191
34.9808	0.01062	0.01466	0.02322	0.53584	0.6471	0.66946	0.88771	1.23779	1.60537
35.0037	0.01065	0.01466	0.02313	0.53742	0.64815	0.66805	0.89056	1.24019	1.60732
35.0266	0.01064	0.0149	0.0227	0.53646	0.64531	0.65916	0.88921	1.23514	1.59837
35.0495	0.01067	0.01504	0.02209	0.53627	0.64244	0.66357	0.88914	1.23004	1.58799
35.0723	0.01082	0.01509	0.02206	0.53472	0.64795	0.66397	0.88685	1.241	1.61287
35.0952	0.01081	0.01518	0.02221	0.53447	0.63933	0.66636	0.88666	1.22502	1.5803
35.1181	0.0106	0.01508	0.02236	0.53376	0.64185	0.6694	0.88567	1.23025	1.59205
35.141	0.01053	0.01505	0.02239	0.53323	0.64092	0.67477	0.885	1.22884	1.58988
35.1639	0.0105	0.01513	0.02238	0.53469	0.6399	0.67511	0.88761	1.22727	1.5839
35.1868	0.01058	0.01513	0.02225	0.53273	0.63777	0.66958	0.88459	1.22353	1.57943
35.2097	0.01056	0.01498	0.02226	0.53272	0.63592	0.66262	0.8848	1.22041	1.5728
35.2326	0.01065	0.015	0.02229	0.53167	0.63549	0.66006	0.88327	1.22006	1.57369
35.2555	0.01064	0.015	0.02206	0.53021	0.63093	0.65661	0.88106	1.21175	1.55898
35.2783	0.01062	0.01513	0.02218	0.53344	0.63468	0.65786	0.88668	1.21939	1.56873
35.3012	0.01055	0.0156	0.02218	0.53537	0.63387	0.65668	0.89016	1.21834	1.56293
35.3241	0.01052	0.01557	0.02238	0.53472	0.63559	0.65514	0.88933	1.22207	1.57144
35.347	0.01049	0.01573	0.02263	0.53404	0.62711	0.65721	0.88845	1.20627	1.53998
35.3699	0.01053	0.01572	0.02294	0.53388	0.61693	0.66551	0.88841	1.18723	1.50099
35.3928	0.01062	0.01574	0.02295	0.53393	0.61745	0.67333	0.88869	1.18868	1.50367
35.4157	0.01057	0.01576	0.02274	0.53291	0.61431	0.66887	0.88722	1.18297	1.49352
35.4386	0.01061	0.01577	0.02248	0.53202	0.60941	0.66979	0.88595	1.17387	1.47619
35.4614	0.01058	0.01573	0.02236	0.53293	0.60857	0.67007	0.8877	1.17266	1.47188
35.4843	0.01051	0.01561	0.02216	0.53368	0.60795	0.68055	0.88918	1.17195	1.46886
35.5072	0.01054	0.01575	0.02201	0.5339	0.60243	0.69123	0.88975	1.16184	1.44753
35.5301	0.01053	0.01578	0.02167	0.53265	0.60157	0.69694	0.88786	1.16058	1.44694
35.553	0.0105	0.0158	0.02147	0.52667	0.60246	0.70129	0.87818	1.1626	1.46124
35.5759	0.0105	0.01548	0.02151	0.52628	0.59961	0.70227	0.87778	1.15744	1.45108
35.5988	0.01054	0.0151	0.02176	0.52943	0.59813	0.70069	0.8833	1.15496	1.4402
35.6217	0.01061	0.015	0.02188	0.52849	0.60218	0.69773	0.88195	1.16323	1.45856
35.6446	0.01066	0.01486	0.02143	0.52566	0.60274	0.70083	0.87747	1.16476	1.46642
35.6674	0.01066	0.01477	0.02123	0.52397	0.60517	0.70078	0.8749	1.16984	1.47954
35.6903	0.01069	0.01474	0.02105	0.52186	0.6023	0.70807	0.87158	1.16463	1.47233
35.7132	0.01068	0.01462	0.0212	0.52513	0.6036	0.70955	0.87726	1.1675	1.47225
35.7361	0.01068	0.01428	0.02145	0.52659	0.60779	0.71344	0.8799	1.17603	1.48697
35.759	0.01067	0.0142	0.02145	0.52602	0.60911	0.71095	0.87916	1.17901	1.49384
35.7819	0.01055	0.01445	0.02133	0.52699	0.60358	0.71153	0.88101	1.1688	1.47099
35.8048	0.01056	0.01463	0.02115	0.53042	0.60422	0.70958	0.88702	1.17045	1.46805
35.8277	0.01064	0.01483	0.02111	0.53204	0.60305	0.70992	0.88993	1.16857	1.46114
35.8505	0.01064	0.01509	0.02114	0.53121	0.60302	0.69867	0.88879	1.1689	1.46302
35.8734	0.01063	0.01516	0.02146	0.52941	0.60036	0.69917	0.886	1.16415	1.4562
35.8963	0.01067	0.01533	0.02151	0.53054	0.60621	0.6965	0.88809	1.1759	1.4781
35.9192	0.01068	0.01546	0.0217	0.5297	0.60876	0.70406	0.88695	1.18124	1.49025
35.9421	0.01085	0.01576	0.02167	0.53127	0.60677	0.70687	0.88981	1.17773	1.48004
35.965	0.01098	0.01602	0.02178	0.53186	0.60622	0.70885	0.89105	1.17704	1.47733
35.9879	0.01105	0.01602	0.02177	0.52827	0.59982	0.71478	0.88532	1.16507	1.45881
36.0108	0.01114	0.01561	0.02186	0.52673	0.59247	0.71343	0.88299	1.15129	1.433
36.0336	0.01126	0.01548	0.02169	0.52843	0.5909	0.71432	0.88603	1.14874	1.42458
36.0565	0.0113	0.01542	0.02147	0.52957	0.59377	0.71177	0.88815	1.15479	1.43477
36.0794	0.01127	0.01556	0.02079	0.52867	0.59384	0.70363	0.88686	1.15533	1.43722
36.1023	0.01122	0.01559	0.02068	0.5279	0.59004	0.70458	0.88582	1.14832	1.42395
36.1252	0.01127	0.01583	0.02044	0.53018	0.59059	0.7053	0.88993	1.14973	1.42251
36.1481	0.0112	0.01594	0.02059	0.52898	0.59363	0.70832	0.88817	1.15604	1.4373
36.171	0.01116	0.01594	0.02062	0.53014	0.59299	0.70915	0.89036	1.15515	1.43318
36.1939	0.01112	0.01592	0.02073	0.5333	0.59342	0.69827	0.89588	1.15632	1.42978
36.2168	0.01099	0.01571	0.02114	0.53401	0.59465	0.69698	0.89731	1.15906	1.4339
36.2396	0.01091	0.01546	0.02135	0.53819	0.59275	0.69742	0.9046	1.15572	1.4194
36.2625	0.01092	0.0154	0.0216	0.54078	0.58928	0.69428	0.90919	1.14941	1.40164
36.2854	0.01096	0.01547	0.02155	0.54189	0.59494	0.69185	0.91129	1.16089	1.42297
36.3083	0.01093	0.01555	0.02121	0.53756	0.59831	0.69126	0.90423	1.16795	1.44485
36.3312	0.01086	0.01573	0.02111	0.54016	0.59813	0.6904	0.90883	1.16803	1.4402
36.3541	0.0108	0.01601	0.02116	0.5446	0.59769	0.69164	0.91652	1.16749	1.43102
36.377	0.01066	0.01642	0.02139	0.54279	0.59989	0.69197	0.9137	1.17218	1.44359
36.3999	0.01061	0.01656	0.02157	0.54487	0.59824	0.68479	0.91742	1.16935	1.43388
36.4227	0.01066	0.01666	0.0214	0.54053	0.60071	0.68385	0.91041	1.17471	1.45223
36.4456	0.01069	0.01679	0.02159	0.54122	0.59744	0.68443	0.91184	1.16882	1.43864
36.4685	0.01074	0.0168	0.02187	0.54164	0.59507	0.68024	0.9128	1.16456	1.4289
36.4914	0.01068	0.01658	0.02194	0.54045	0.59341	0.6779	0.91103	1.16161	1.42472
36.5143	0.01058	0.01661	0.02186	0.54032	0.59386	0.67704	0.91106	1.16281	1.42714
36.5372	0.01043	0.01649	0.02165	0.54187	0.59183	0.67584	0.91388	1.1592	1.41677
36.5601	0.01052	0.01632	0.02154	0.53985	0.58995	0.67785	0.91069	1.15593	1.41342
36.583	0.01063	0.01622	0.02149	0.54067	0.59648	0.67816	0.91229	1.16922	1.439
36.6059	0.01055	0.01636	0.02157	0.54232	0.5925	0.67933	0.91533	1.16186	1.42072
36.6287	0.01052	0.01628	0.02141	0.54131	0.59012	0.67247	0.91386	1.15757	1.41347
36.6516	0.01029	0.01615	0.02144	0.5411	0.59056	0.6691	0.91374	1.15874	1.41598
36.6745	0.01016	0.01582	0.02147	0.54278	0.592	0.66707	0.9168	1.16196	1.41937
36.6974	0.01006	0.01561	0.02122	0.54267	0.59237	0.66036	0.91684	1.16307	1.42161
36.7203	0.00997	0.01556	0.02105	0.54562	0.59188	0.66637	0.92205	1.16245	1.41487
36.7432	0.00997	0.01559	0.02099	0.54469	0.59516	0.6646	0.92071	1.16925	1.43021
36.7661	0.01006	0.0155	0.02099	0.54188	0.59263	0.67521	0.91621	1.1646	1.42541
36.789	0.01007	0.01527	0.02115	0.54064	0.59586	0.67473	0.91429	1.17134	1.44126
36.8118	0.01013	0.01525	0.02131	0.54018	0.59798	0.66976	0.91373	1.17595	1.45128
36.8347	0.01018	0.01505	0.0215	0.53781	0.59894	0.66953	0.90995	1.17827	1.46001
36.8576	0.01012	0.01501	0.02152	0.53838	0.5994	0.67472	0.91116	1.17967	1.46161
36.8805	0.01014	0.01522	0.02157	0.53479	0.60012	0.67275	0.90535	1.18146	1.47139
36.9034	0.01023	0.01547	0.02154	0.53307	0.5995	0.66986	0.90274	1.18056	1.47227
36.9263	0.01028	0.01558	0.02119	0.53706	0.60349	0.66066	0.90975	1.18886	1.48192
36.9492	0.01041	0.01556	0.02128	0.53535	0.60267	0.65444	0.90706	1.18763	1.48223
36.9721	0.01042	0.01566	0.02104	0.5323	0.60403	0.65395	0.90212	1.19074	1.4938
36.995	0.01034	0.01562	0.0214	0.53293	0.60094	0.6525	0.90344	1.18514	1.48092
37.0178	0.0103	0.01566	0.02146	0.53722	0.60206	0.6499	0.91096	1.1878	1.47847
37.0407	0.01024	0.01545	0.02149	0.53358	0.60006	0.64754	0.90502	1.18424	1.47742
37.0636	0.01012	0.01522	0.02157	0.52816	0.59939	0.63844	0.89607	1.18337	1.48503
37.0865	0.01008	0.01488	0.02183	0.52864	0.59401	0.64317	0.89712	1.17322	1.46312
37.1094	0.00993	0.01475	0.02189	0.52751	0.59729	0.64615	0.89544	1.18007	1.47893
37.1323	0.00984	0.01472	0.02196	0.52801	0.59239	0.6501	0.89652	1.17082	1.45884
37.1552	0.00993	0.01484	0.02169	0.52416	0.59006	0.64354	0.89023	1.16656	1.45671
37.1781	0.00998	0.01474	0.02139	0.5251	0.59545	0.64158	0.89206	1.17765	1.47752
37.2009	0.01008	0.01464	0.0214	0.5241	0.59948	0.64371	0.89059	1.18611	1.49642
37.2238	0.01018	0.0143	0.02159	0.52151	0.5997	0.64565	0.88646	1.18712	1.50282
37.2467	0.01022	0.01414	0.02184	0.5188	0.60057	0.64213	0.88213	1.18924	1.51171
37.2696	0.01009	0.01401	0.02196	0.52092	0.6029	0.64281	0.88595	1.19416	1.51777
37.2925	0.00993	0.01397	0.02169	0.52366	0.59611	0.64017	0.89084	1.18104	1.48575
37.3154	0.00994	0.01371	0.02178	0.52369	0.59649	0.65252	0.89114	1.18218	1.48776
37.3383	0.00996	0.01372	0.0219	0.52422	0.59799	0.6513	0.89228	1.18562	1.49363
37.3612	0.01002	0.01353	0.02218	0.5232	0.60222	0.65445	0.89079	1.19451	1.51342
37.3841	0.00995	0.01346	0.02227	0.524	0.60253	0.66186	0.89241	1.19557	1.51389
37.4069	0.01001	0.01357	0.02264	0.52404	0.60341	0.66184	0.89269	1.19773	1.51802
37.4298	0.01001	0.01361	0.02313	0.5216	0.60453	0.65588	0.88883	1.20034	1.52742
37.4527	0.00994	0.01355	0.02343	0.52091	0.60056	0.65441	0.88789	1.19297	1.5133
37.4756	0.00982	0.01352	0.02334	0.51981	0.59913	0.64655	0.88626	1.19054	1.51005
37.4985	0.00981	0.01366	0.02338	0.52183	0.59807	0.64639	0.88997	1.18891	1.50279
37.5214	0.00983	0.01365	0.02328	0.52079	0.59897	0.64868	0.88844	1.19109	1.50888
37.5443	0.00982	0.01379	0.02374	0.52045	0.60418	0.64777	0.88808	1.20186	1.53133
37.5672	0.00986	0.01378	0.02358	0.52039	0.60243	0.64397	0.88817	1.19878	1.52492
37.59	0.0098	0.01361	0.02363	0.52311	0.60253	0.6467	0.89299	1.19942	1.52116
37.6129	0.00974	0.01337	0.0238	0.52106	0.60424	0.6476	0.88972	1.2033	1.53256
37.6358	0.00965	0.01328	0.02387	0.51451	0.59925	0.64854	0.87883	1.19386	1.52464
37.6587	0.00952	0.01334	0.02373	0.51413	0.59956	0.64739	0.87848	1.19484	1.52701
37.6816	0.00945	0.01326	0.02375	0.51298	0.60295	0.6483	0.87675	1.20198	1.54346
37.7045	0.00935	0.01325	0.02356	0.50957	0.60136	0.65203	0.87115	1.19919	1.54363
37.7274	0.00935	0.01328	0.02351	0.50751	0.59692	0.65626	0.86785	1.19073	1.52975
37.7503	0.00931	0.01338	0.02356	0.51238	0.59815	0.66082	0.87639	1.19359	1.52664
37.7732	0.00932	0.01359	0.02359	0.5151	0.59775	0.66406	0.88129	1.19316	1.52062
37.796	0.0094	0.0136	0.02353	0.51486	0.60427	0.65894	0.88112	1.20661	1.54838
37.8189	0.00957	0.01361	0.02354	0.51443	0.60257	0.65581	0.8806	1.20362	1.5428
37.8418	0.00961	0.01361	0.02334	0.51198	0.60656	0.65733	0.87664	1.21204	1.56422
37.8647	0.00941	0.01339	0.02313	0.51416	0.608	0.66155	0.88059	1.21533	1.56682
37.8876	0.00928	0.01338	0.02302	0.51761	0.60869	0.66209	0.88677	1.21724	1.56423
37.9105	0.00912	0.01357	0.02303	0.51877	0.60715	0.66161	0.88898	1.21455	1.5564
37.9334	0.00904	0.01363	0.023	0.51748	0.60421	0.66245	0.88698	1.209	1.54712
37.9563	0.00912	0.01359	0.02295	0.51732	0.60626	0.66828	0.88691	1.21349	1.55639
37.9791	0.00935	0.01361	0.0229	0.51796	0.60835	0.66489	0.88823	1.21814	1.56454
38.002	0.00946	0.01351	0.02305	0.51646	0.60783	0.66625	0.88591	1.21752	1.56571
38.0249	0.00943	0.01359	0.02306	0.51194	0.6074	0.65397	0.87843	1.21712	1.57275
38.0478	0.00941	0.01349	0.02321	0.51136	0.60466	0.65502	0.87768	1.21204	1.56311
38.0707	0.00938	0.01354	0.02358	0.51213	0.60283	0.65387	0.87924	1.20878	1.55479
38.0936	0.00948	0.01353	0.02375	0.51077	0.60206	0.64936	0.87717	1.20763	1.55462
38.1165	0.00959	0.01352	0.02344	0.5123	0.60184	0.64763	0.88005	1.20762	1.55157
38.1394	0.00964	0.01347	0.0231	0.51096	0.60094	0.64689	0.878	1.20619	1.55078
38.1623	0.00965	0.01338	0.02286	0.51188	0.60056	0.65332	0.87981	1.20582	1.54813
38.1851	0.0097	0.0134	0.0229	0.51668	0.60703	0.64977	0.88827	1.2192	1.56668
38.208	0.00977	0.0133	0.02259	0.51432	0.60488	0.65196	0.88439	1.2153	1.56276
38.2309	0.00976	0.01311	0.02241	0.51683	0.60255	0.6464	0.8889	1.21108	1.54937
38.2538	0.00963	0.01288	0.02182	0.51652	0.59747	0.64535	0.88859	1.20136	1.52976
38.2767	0.00958	0.01273	0.02188	0.5174	0.59893	0.63841	0.89037	1.20472	1.5348
38.2996	0.00962	0.01272	0.02193	0.51999	0.59782	0.63783	0.89513	1.20286	1.52596
38.3225	0.00965	0.01274	0.02201	0.52167	0.59545	0.6416	0.89829	1.19843	1.51357
38.3454	0.00977	0.01276	0.02193	0.52218	0.59491	0.64422	0.89938	1.19769	1.51092
38.3682	0.00983	0.01266	0.02179	0.52214	0.59642	0.64875	0.89953	1.20111	1.51776
38.3911	0.0099	0.01261	0.02182	0.5223	0.59125	0.65464	0.89998	1.19114	1.49685
38.414	0.01004	0.01281	0.0216	0.52292	0.59343	0.65006	0.90127	1.19595	1.50536
38.4369	0.01001	0.0128	0.02172	0.52213	0.59402	0.6473	0.90016	1.19755	1.50981
38.4598	0.01012	0.01277	0.02154	0.522	0.60042	0.64356	0.90021	1.21091	1.53713
38.4827	0.01015	0.01262	0.02141	0.52184	0.60127	0.64222	0.90016	1.21295	1.54138
38.5056	0.01015	0.0126	0.02095	0.52245	0.59521	0.64446	0.90141	1.20115	1.51589
38.5285	0.01014	0.01253	0.02074	0.52165	0.59525	0.64459	0.90024	1.20163	1.51808
38.5513	0.01016	0.01252	0.02076	0.52249	0.59344	0.63951	0.90189	1.19849	1.50993
38.5742	0.01022	0.01258	0.02083	0.52005	0.59337	0.63649	0.8979	1.19878	1.51472
38.5971	0.01036	0.01259	0.02101	0.51388	0.58734	0.63853	0.88749	1.18704	1.50158
38.62	0.0105	0.01235	0.02122	0.5124	0.59173	0.6361	0.88515	1.19634	1.52309
38.6429	0.01064	0.01232	0.02102	0.51373	0.59626	0.63301	0.88768	1.20587	1.53997
38.6658	0.01064	0.01229	0.02094	0.51603	0.59898	0.62665	0.89192	1.21179	1.54765
38.6887	0.01058	0.0124	0.02086	0.51466	0.59426	0.6282	0.88983	1.20263	1.53107
38.7116	0.0105	0.01256	0.02081	0.51554	0.59725	0.6279	0.89163	1.20905	1.54234
38.7345	0.01048	0.01256	0.02079	0.51978	0.59718	0.62585	0.8992	1.20924	1.53479
38.7573	0.0104	0.01262	0.02044	0.51985	0.59648	0.62837	0.89951	1.20821	1.53234
38.7802	0.01034	0.01261	0.01983	0.51903	0.59277	0.6288	0.8983	1.20114	1.51913
38.8031	0.01021	0.01261	0.01954	0.51661	0.59928	0.62673	0.89429	1.21488	1.5515
38.826	0.00998	0.01254	0.01974	0.51492	0.59942	0.62942	0.8916	1.21555	1.5557
38.8489	0.00986	0.01286	0.01975	0.51657	0.59926	0.63561	0.89472	1.21554	1.55239
38.8718	0.00978	0.01321	0.01991	0.51619	0.60386	0.62937	0.89429	1.22527	1.57281
38.8947	0.00975	0.01348	0.0199	0.51303	0.59927	0.63583	0.88913	1.21642	1.56008
38.9176	0.00962	0.01346	0.02011	0.51572	0.5968	0.63289	0.89404	1.21184	1.54553
38.9404	0.00958	0.01355	0.02032	0.51699	0.6019	0.6383	0.89653	1.22268	1.56513
38.9633	0.00968	0.01358	0.02038	0.51793	0.60227	0.639	0.89839	1.22381	1.56549
38.9862	0.00971	0.01358	0.02051	0.51791	0.59862	0.63845	0.89859	1.21678	1.55089
39.0091	0.00972	0.01345	0.0205	0.51308	0.59938	0.63591	0.89044	1.21873	1.56343
39.032	0.00967	0.01349	0.0204	0.51065	0.59992	0.63456	0.88644	1.22022	1.5707
39.0549	0.00957	0.01344	0.02071	0.5123	0.60227	0.62991	0.88952	1.22546	1.5782
39.0778	0.00946	0.01345	0.02135	0.51188	0.60079	0.62799	0.88905	1.22283	1.5733
39.1007	0.00932	0.01364	0.02144	0.51175	0.60313	0.62445	0.88908	1.22799	1.58385
39.1236	0.00916	0.01351	0.0219	0.51047	0.60271	0.63188	0.8871	1.22753	1.58498
39.1464	0.00915	0.01332	0.02185	0.50885	0.60115	0.63226	0.88453	1.22469	1.58185
39.1693	0.00911	0.0133	0.02206	0.50461	0.59185	0.63428	0.87742	1.20627	1.55156
39.1922	0.00911	0.01321	0.02209	0.50271	0.59075	0.63428	0.87434	1.2045	1.55117
39.2151	0.00911	0.0131	0.02213	0.50632	0.58921	0.63003	0.8809	1.20183	1.53881
39.238	0.00901	0.01311	0.02215	0.51011	0.5891	0.63518	0.88774	1.20203	1.53204
39.2609	0.00891	0.0131	0.02222	0.51011	0.58787	0.63939	0.88798	1.19992	1.52746
39.2838	0.0089	0.01314	0.0221	0.51215	0.58913	0.63983	0.89174	1.20285	1.52952
39.3067	0.00879	0.01312	0.02197	0.51634	0.58765	0.63802	0.89926	1.20021	1.51622
39.3295	0.00868	0.01321	0.02171	0.51529	0.57977	0.64023	0.89765	1.18461	1.48591
39.3524	0.00854	0.01323	0.02192	0.51314	0.57831	0.64442	0.89415	1.18214	1.48454
39.3753	0.00844	0.01322	0.02189	0.51221	0.57346	0.64363	0.89276	1.17272	1.46668
39.3982	0.00835	0.01303	0.02198	0.51363	0.57581	0.64123	0.89547	1.17792	1.47449
39.4211	0.00835	0.01289	0.02191	0.51261	0.57568	0.64024	0.89394	1.17811	1.47649
39.444	0.00852	0.0127	0.02169	0.51201	0.57601	0.64112	0.89314	1.17924	1.47964
39.4669	0.00867	0.0126	0.02193	0.51097	0.57702	0.64356	0.89157	1.18166	1.48627
39.4898	0.00871	0.01253	0.02197	0.51001	0.57736	0.64468	0.89013	1.18269	1.48988
39.5127	0.00878	0.01265	0.02172	0.51331	0.56865	0.64333	0.89613	1.16523	1.44778
39.5355	0.0089	0.01266	0.02142	0.51078	0.56594	0.64736	0.89194	1.16005	1.44157
39.5584	0.0089	0.0123	0.02141	0.50874	0.57313	0.64352	0.88864	1.17535	1.4764
39.5813	0.00887	0.01205	0.02165	0.5074	0.56796	0.64345	0.88652	1.16529	1.45799
39.6042	0.00887	0.01176	0.0217	0.50809	0.56791	0.63598	0.88796	1.16568	1.45729
39.6271	0.00892	0.01182	0.02167	0.51096	0.56846	0.63603	0.89321	1.16718	1.45485
39.65	0.00891	0.01192	0.02165	0.5068	0.56601	0.63785	0.88615	1.16261	1.45288
39.6729	0.00892	0.01208	0.02166	0.50461	0.56526	0.64065	0.88255	1.16154	1.45448
39.6958	0.0089	0.01226	0.02165	0.50431	0.56692	0.647	0.88228	1.16535	1.46257
39.7186	0.00888	0.01243	0.02158	0.50563	0.56781	0.64691	0.88487	1.16757	1.46441
39.7415	0.00896	0.01238	0.02139	0.50992	0.57595	0.64305	0.89264	1.18477	1.49149
39.7644	0.00897	0.01236	0.0213	0.51115	0.57199	0.64178	0.89506	1.17702	1.47308
39.7873	0.00904	0.0125	0.02088	0.51158	0.57301	0.63772	0.89606	1.17948	1.47707
[truncated: 875 more rows]
