# Supplementary material for: The impacts of moisture transport on drifting snow sublimation in the saltation layer
Source: Copernicus journal article supplement (doi:10.5194/acp-16-7523-2016), 2016-06-20
Supplement: Supplementary file 4 [file Data in Figure 4.xlsx]

## Sheet: Sublimation Rate
u*=0.3 m/s		u*=0.4 m/s		u*=0.5 m/s
Sublimation rate (10-4 kg m-3 s-1)	Height (cm)	Sublimation rate (10-4 kg m-3 s-1)	Height (cm)	Sublimation rate (10-4 kg m-3 s-1)	Height (cm)
7.03872	0.003	10.3431	0.003	15.1486	0.003
6.91739	0.00424996	10.1942	0.00424996	14.9054	0.00424996
6.79971	0.00549992	10.0496	0.00549992	14.6674	0.00549992
6.68568	0.00674989	9.90942	0.00674989	14.4345	0.00674989
6.57529	0.00799985	9.77358	0.00799985	14.2066	0.00799985
6.46855	0.00924981	9.64209	0.00924981	13.9839	0.00924981
6.36546	0.0104998	9.51496	0.0104998	13.7662	0.0104998
6.26602	0.0117497	9.39219	0.0117497	13.5536	0.0117497
6.17022	0.0129997	9.27377	0.0129997	13.3462	0.0129997
6.07807	0.0142497	9.15971	0.0142497	13.1438	0.0142497
5.98957	0.0154996	9.05001	0.0154996	12.9466	0.0154996
5.90472	0.0167496	8.94466	0.0167496	12.7544	0.0167496
5.82352	0.0179995	8.84367	0.0179995	12.5673	0.0179995
5.74596	0.0192495	8.74703	0.0192495	12.3854	0.0192495
5.67205	0.0204995	8.65476	0.0204995	12.2085	0.0204995
5.60179	0.0217494	8.56684	0.0217494	12.0367	0.0217494
5.53517	0.0229994	8.48327	0.0229994	11.87	0.0229994
5.47221	0.0242494	8.40407	0.0242494	11.7084	0.0242494
5.41289	0.0254993	8.32922	0.0254993	11.5519	0.0254993
5.35722	0.0267493	8.25872	0.0267493	11.4005	0.0267493
5.30519	0.0279992	8.19259	0.0279992	11.2543	0.0279992
5.25682	0.0292492	8.13081	0.0292492	11.113	0.0292492
5.21209	0.0304992	8.07338	0.0304992	10.977	0.0304992
5.17101	0.0317491	8.02032	0.0317491	10.846	0.0317491
5.13358	0.0329991	7.97161	0.0329991	10.7201	0.0329991
5.09979	0.0342491	7.92725	0.0342491	10.5992	0.0342491
5.08028	0.035499	7.89796	0.035499	10.4934	0.035499
5.06509	0.036749	7.87356	0.036749	10.3928	0.036749
5.05402	0.0379989	7.85402	0.0379989	10.2974	0.0379989
5.04682	0.0392489	7.83917	0.0392489	10.207	0.0392489
5.04314	0.0404989	7.82875	0.0404989	10.1215	0.0404989
5.04249	0.0417488	7.82239	0.0417488	10.0404	0.0417488
5.0444	0.0429988	7.82007	0.0429988	9.96342	0.0429988
5.04863	0.0442488	7.82138	0.0442488	9.89042	0.0442488
5.05479	0.0454987	7.82596	0.0454987	9.82115	0.0454987
5.06253	0.0467487	7.83344	0.0467487	9.75543	0.0467487
5.07153	0.0479986	7.84324	0.0479986	9.693	0.0479986
5.08147	0.0492486	7.8548	0.0492486	9.63345	0.0492486
5.09197	0.0504986	7.86746	0.0504986	9.57651	0.0504986
5.1026	0.0517485	7.88071	0.0517485	9.52207	0.0517485
5.11299	0.0529985	7.89379	0.0529985	9.46977	0.0529985
5.12264	0.0542485	7.90626	0.0542485	9.41934	0.0542485
5.13139	0.0554984	7.91784	0.0554984	9.3704	0.0554984
5.13893	0.0567484	7.92803	0.0567484	9.32257	0.0567484
5.14483	0.0579983	7.93631	0.0579983	9.27562	0.0579983
5.14868	0.0592483	7.94247	0.0592483	9.22943	0.0592483
5.15008	0.0604983	7.94619	0.0604983	9.18381	0.0604983
5.14889	0.0617482	7.94712	0.0617482	9.13875	0.0617482
5.14488	0.0629982	7.94482	0.0629982	9.09405	0.0629982
5.13776	0.0642482	7.93902	0.0642482	9.04944	0.0642482
5.12735	0.0654981	7.92944	0.0654981	9.00505	0.0654981
5.11348	0.0667481	7.91574	0.0667481	8.96095	0.0667481
5.09648	0.0679981	7.89822	0.0679981	8.91754	0.0679981
5.07639	0.069248	7.87678	0.069248	8.87489	0.069248
5.05336	0.070498	7.85156	0.070498	8.83271	0.070498
5.0273	0.0717479	7.82269	0.0717479	8.7913	0.0717479
4.99825	0.0729979	7.79042	0.0729979	8.75075	0.0729979
4.9664	0.0742479	7.75479	0.0742479	8.71079	0.0742479
4.93214	0.0754978	7.71573	0.0754978	8.67132	0.0754978
4.89575	0.0767478	7.67349	0.0767478	8.6323	0.0767478
4.8575	0.0779978	7.62835	0.0779978	8.59381	0.0779978
4.8179	0.0792477	7.58067	0.0792477	8.55585	0.0792477
4.77718	0.0804977	7.53058	0.0804977	8.51827	0.0804977
4.73593	0.0817476	7.47851	0.0817476	8.48087	0.0817476
4.69474	0.0829976	7.42474	0.0829976	8.44364	0.0829976
4.65399	0.0842476	7.36917	0.0842476	8.40673	0.0842476
4.61399	0.0854975	7.31218	0.0854975	8.37016	0.0854975
4.57499	0.0867475	7.25444	0.0867475	8.33381	0.0867475
4.53746	0.0879975	7.19634	0.0879975	8.29762	0.0879975
4.50175	0.0892474	7.13809	0.0892474	8.2618	0.0892474
4.46822	0.0904974	7.08003	0.0904974	8.22632	0.0904974
4.43716	0.0917473	7.02229	0.0917473	8.19114	0.0917473
4.40909	0.0929973	6.96572	0.0929973	8.15652	0.0929973
4.38406	0.0942473	6.9108	0.0942473	8.12255	0.0942473
4.36203	0.0954972	6.85805	0.0954972	8.08915	0.0954972
4.3431	0.0967472	6.80781	0.0967472	8.05637	0.0967472
4.32698	0.0979972	6.76034	0.0979972	8.02392	0.0979972
4.31345	0.0992471	6.71584	0.0992471	7.99177	0.0992471
4.30248	0.100497	6.67461	0.100497	7.95995	0.100497
4.29391	0.101747	6.63656	0.101747	7.92862	0.101747
4.28744	0.102997	6.60168	0.102997	7.89745	0.102997
4.28294	0.104247	6.5701	0.104247	7.86644	0.104247
4.28065	0.105497	6.54194	0.105497	7.83552	0.105497
4.28074	0.106747	6.51667	0.106747	7.80486	0.106747
4.28295	0.107997	6.49416	0.107997	7.77415	0.107997
4.28719	0.109247	6.47411	0.109247	7.74355	0.109247
4.29332	0.110497	6.45594	0.110497	7.71273	0.110497
4.30112	0.111747	6.43936	0.111747	7.6817	0.111747
4.31043	0.112997	6.42396	0.112997	7.65062	0.112997
4.32095	0.114247	6.40963	0.114247	7.61953	0.114247
4.33249	0.115497	6.39601	0.115497	7.58825	0.115497
4.34478	0.116747	6.38318	0.116747	7.55679	0.116747
4.35789	0.117997	6.37099	0.117997	7.52512	0.117997
4.37113	0.119247	6.35907	0.119247	7.49343	0.119247
4.3842	0.120496	6.3472	0.120496	7.46195	0.120496
4.39698	0.121746	6.33518	0.121746	7.4308	0.121746
4.40942	0.122996	6.3226	0.122996	7.39985	0.122996
4.42154	0.124246	6.30918	0.124246	7.36914	0.124246
4.43295	0.125496	6.29463	0.125496	7.33835	0.125496
4.44345	0.126746	6.27886	0.126746	7.30763	0.126746
4.45308	0.127996	6.26181	0.127996	7.27725	0.127996
4.46176	0.129246	6.24337	0.129246	7.24696	0.129246
4.46947	0.130496	6.22365	0.130496	7.21656	0.130496
4.47599	0.131746	6.2025	0.131746	7.1863	0.131746
4.48122	0.132996	6.18003	0.132996	7.156	0.132996
4.48511	0.134246	6.15615	0.134246	7.12578	0.134246
4.48791	0.135496	6.13069	0.135496	7.09544	0.135496
4.4899	0.136746	6.1036	0.136746	7.0647	0.136746
4.49119	0.137996	6.07476	0.137996	7.03384	0.137996
4.49182	0.139246	6.04456	0.139246	7.00287	0.139246
4.49174	0.140496	6.01314	0.140496	6.97172	0.140496
4.49111	0.141746	5.9805	0.141746	6.94017	0.141746
4.49023	0.142996	5.94649	0.142996	6.90827	0.142996
4.4895	0.144246	5.91127	0.144246	6.87609	0.144246
4.48881	0.145496	5.87502	0.145496	6.84379	0.145496
4.48818	0.146746	5.838	0.146746	6.81132	0.146746
4.48766	0.147996	5.80075	0.147996	6.77855	0.147996
4.4875	0.149246	5.76352	0.149246	6.74542	0.149246
4.4877	0.150496	5.72631	0.150496	6.71217	0.150496
4.48812	0.151746	5.68942	0.151746	6.67905	0.151746
4.48868	0.152996	5.65328	0.152996	6.64592	0.152996
4.48928	0.154245	5.61826	0.154245	6.61328	0.154245
4.48982	0.155495	5.58492	0.155495	6.58127	0.155495
4.48987	0.156745	5.55296	0.156745	6.54984	0.156745
4.48939	0.157995	5.52262	0.157995	6.51885	0.157995
4.48835	0.159245	5.49391	0.159245	6.48813	0.159245
4.48668	0.160495	5.46686	0.160495	6.45763	0.160495
4.48444	0.161745	5.4416	0.161745	6.42746	0.161745
4.48171	0.162995	5.41816	0.162995	6.3977	0.162995
4.47859	0.164245	5.39654	0.164245	6.36864	0.164245
4.47521	0.165495	5.37683	0.165495	6.34	0.165495
4.47183	0.166745	5.35911	0.166745	6.31175	0.166745
4.46859	0.167995	5.34314	0.167995	6.28389	0.167995
4.46526	0.169245	5.32878	0.169245	6.25667	0.169245
4.46175	0.170495	5.31598	0.170495	6.23008	0.170495
4.45817	0.171745	5.30459	0.171745	6.20455	0.171745
4.4544	0.172995	5.29437	0.172995	6.17998	0.172995
4.45056	0.174245	5.28546	0.174245	6.15679	0.174245
4.44669	0.175495	5.27775	0.175495	6.13496	0.175495
4.44257	0.176745	5.2715	0.176745	6.1145	0.176745
4.43828	0.177995	5.26672	0.177995	6.09538	0.177995
4.43384	0.179245	5.26337	0.179245	6.07755	0.179245
4.42922	0.180495	5.26133	0.180495	6.06107	0.180495
4.42412	0.181745	5.26044	0.181745	6.04608	0.181745
4.41896	0.182995	5.26041	0.182995	6.03235	0.182995
4.41372	0.184245	5.2612	0.184245	6.0198	0.184245
4.40823	0.185495	5.2629	0.185495	6.00841	0.185495
4.40242	0.186744	5.26546	0.186744	5.99802	0.186744
4.39622	0.187994	5.26873	0.187994	5.9886	0.187994
4.38982	0.189244	5.27266	0.189244	5.98055	0.189244
4.38335	0.190494	5.27733	0.190494	5.97384	0.190494
4.37657	0.191744	5.28241	0.191744	5.96843	0.191744
4.36951	0.192994	5.28781	0.192994	5.96418	0.192994
4.36212	0.194244	5.29342	0.194244	5.96087	0.194244
4.35464	0.195494	5.29905	0.195494	5.95822	0.195494
4.34736	0.196744	5.30441	0.196744	5.95615	0.196744
4.34043	0.197994	5.30945	0.197994	5.9545	0.197994
4.33374	0.199244	5.31439	0.199244	5.95313	0.199244
4.32713	0.200494	5.31905	0.200494	5.95211	0.200494
4.32061	0.201744	5.3236	0.201744	5.95091	0.201744
4.3143	0.202994	5.32777	0.202994	5.9492	0.202994
4.30854	0.204244	5.33144	0.204244	5.94674	0.204244
4.30352	0.205494	5.33468	0.205494	5.94342	0.205494
4.29891	0.206744	5.33755	0.206744	5.93879	0.206744
4.29441	0.207994	5.3401	0.207994	5.93275	0.207994
4.29024	0.209244	5.34205	0.209244	5.9251	0.209244
4.28625	0.210494	5.34332	0.210494	5.91597	0.210494
4.28242	0.211744	5.34383	0.211744	5.90546	0.211744
4.27845	0.212994	5.34362	0.212994	5.89381	0.212994
4.27429	0.214244	5.34271	0.214244	5.88084	0.214244
4.27001	0.215494	5.3409	0.215494	5.86648	0.215494
4.26561	0.216744	5.33822	0.216744	5.85084	0.216744
4.26116	0.217994	5.3345	0.217994	5.83341	0.217994
4.25667	0.219244	5.32952	0.219244	5.81418	0.219244
4.2521	0.220493	5.32366	0.220493	5.79311	0.220493
4.24739	0.221743	5.31677	0.221743	5.77026	0.221743
4.24258	0.222993	5.30891	0.222993	5.74608	0.222993
4.23753	0.224243	5.30027	0.224243	5.72074	0.224243
4.23228	0.225493	5.29081	0.225493	5.69449	0.225493
4.22682	0.226743	5.28083	0.226743	5.66741	0.226743
4.22097	0.227993	5.27051	0.227993	5.63938	0.227993
4.2145	0.229243	5.26	0.229243	5.61095	0.229243
4.20732	0.230493	5.24943	0.230493	5.58252	0.230493
4.19943	0.231743	5.23897	0.231743	5.5545	0.231743
4.19096	0.232993	5.22867	0.232993	5.52725	0.232993
4.18179	0.234243	5.21883	0.234243	5.50114	0.234243
4.17186	0.235493	5.20946	0.235493	5.47647	0.235493
4.16145	0.236743	5.20081	0.236743	5.45341	0.236743
4.1503	0.237993	5.19271	0.237993	5.43209	0.237993
4.1383	0.239243	5.18548	0.239243	5.41272	0.239243
4.12544	0.240493	5.17873	0.240493	5.39552	0.240493
4.11156	0.241743	5.17221	0.241743	5.38061	0.241743
4.09654	0.242993	5.16592	0.242993	5.36827	0.242993
4.08046	0.244243	5.15991	0.244243	5.3586	0.244243
4.06346	0.245493	5.15385	0.245493	5.35145	0.245493
4.04529	0.246743	5.14796	0.246743	5.34689	0.246743
4.02608	0.247993	5.14199	0.247993	5.34479	0.247993
4.00611	0.249243	5.13568	0.249243	5.34509	0.249243
3.98552	0.250493	5.1289	0.250493	5.34815	0.250493
3.96444	0.251743	5.12162	0.251743	5.35407	0.251743
3.94292	0.252993	5.11383	0.252993	5.36244	0.252993
3.92088	0.254242	5.10514	0.254242	5.37306	0.254242
3.89869	0.255492	5.0955	0.255492	5.38535	0.255492
3.87645	0.256742	5.08466	0.256742	5.39928	0.256742
3.85443	0.257992	5.0724	0.257992	5.41474	0.257992
3.83279	0.259242	5.05888	0.259242	5.43139	0.259242
3.8114	0.260492	5.0442	0.260492	5.44878	0.260492
3.79029	0.261742	5.02828	0.261742	5.46648	0.261742
3.76972	0.262992	5.01067	0.262992	5.484	0.262992
3.7499	0.264242	4.99132	0.264242	5.50064	0.264242
3.73113	0.265492	4.96999	0.265492	5.51615	0.265492
3.7134	0.266742	4.94654	0.266742	5.53024	0.266742
3.6967	0.267992	4.92084	0.267992	5.54275	0.267992
3.68096	0.269242	4.8926	0.269242	5.55355	0.269242
3.66651	0.270492	4.86176	0.270492	5.56301	0.270492
3.65365	0.271742	4.82836	0.271742	5.57094	0.271742
3.64218	0.272992	4.79264	0.272992	5.57736	0.272992
3.63228	0.274242	4.75459	0.274242	5.58193	0.274242
3.62389	0.275492	4.71421	0.275492	5.58432	0.275492
3.61715	0.276742	4.67144	0.276742	5.58422	0.276742
3.61218	0.277992	4.62648	0.277992	5.5817	0.277992
3.6088	0.279242	4.57985	0.279242	5.57666	0.279242
3.60688	0.280492	4.53153	0.280492	5.56916	0.280492
3.60613	0.281742	4.48179	0.281742	5.55968	0.281742
3.60614	0.282992	4.43112	0.282992	5.54839	0.282992
3.60682	0.284242	4.37979	0.284242	5.53551	0.284242
3.60805	0.285492	4.32841	0.285492	5.52141	0.285492
3.60948	0.286741	4.27747	0.286741	5.50599	0.286741
3.61101	0.287991	4.2273	0.287991	5.48934	0.287991
3.61233	0.289241	4.17848	0.289241	5.47156	0.289241
3.61334	0.290491	4.13144	0.290491	5.45307	0.290491
3.6138	0.291741	4.08632	0.291741	5.43442	0.291741
3.61389	0.292991	4.04346	0.292991	5.41573	0.292991
3.61361	0.294241	4.00296	0.294241	5.39756	0.294241
3.61285	0.295491	3.96517	0.295491	5.38028	0.295491
3.6114	0.296741	3.93026	0.296741	5.36389	0.296741
3.60931	0.297991	3.89819	0.297991	5.34857	0.297991
3.60655	0.299241	3.86913	0.299241	5.33421	0.299241
3.60265	0.300491	3.84309	0.300491	5.32088	0.300491
3.59771	0.301741	3.82031	0.301741	5.30863	0.301741
3.59168	0.302991	3.80059	0.302991	5.29747	0.302991
3.58456	0.304241	3.78411	0.304241	5.28728	0.304241
3.5765	0.305491	3.77101	0.305491	5.2781	0.305491
3.56767	0.306741	3.76123	0.306741	5.26987	0.306741
3.55805	0.307991	3.75448	0.307991	5.2623	0.307991
3.54773	0.309241	3.75087	0.309241	5.25522	0.309241
3.53684	0.310491	3.75008	0.310491	5.2488	0.310491
3.52536	0.311741	3.75215	0.311741	5.24309	0.311741
3.51337	0.312991	3.75706	0.312991	5.23805	0.312991
3.50095	0.314241	3.76448	0.314241	5.23326	0.314241
3.48817	0.315491	3.7741	0.315491	5.22832	0.315491
3.47506	0.316741	3.78539	0.316741	5.22316	0.316741
3.46173	0.317991	3.79804	0.317991	5.21739	0.317991
3.44828	0.319241	3.81187	0.319241	5.21118	0.319241
3.4349	0.32049	3.82683	0.32049	5.20414	0.32049
3.4216	0.32174	3.84256	0.32174	5.19596	0.32174
3.40825	0.32299	3.85849	0.32299	5.1863	0.32299
3.39514	0.32424	3.87405	0.32424	5.17519	0.32424
3.38253	0.32549	3.88873	0.32549	5.16263	0.32549
3.37042	0.32674	3.90218	0.32674	5.1486	0.32674
3.35915	0.32799	3.914	0.32799	5.13322	0.32799
3.34878	0.32924	3.92388	0.32924	5.11671	0.32924
3.33954	0.33049	3.93159	0.33049	5.09923	0.33049
3.33148	0.33174	3.93681	0.33174	5.08077	0.33174
3.32469	0.33299	3.93948	0.33299	5.06148	0.33299
3.319	0.33424	3.93939	0.33424	5.04092	0.33424
3.31425	0.33549	3.93613	0.33549	5.01907	0.33549
3.31042	0.33674	3.9296	0.33674	4.99594	0.33674
3.30733	0.33799	3.91966	0.33799	4.9718	0.33799
3.30495	0.33924	3.90644	0.33924	4.94705	0.33924
3.30301	0.34049	3.89015	0.34049	4.92195	0.34049
3.30118	0.34174	3.87084	0.34174	4.89666	0.34174
3.29921	0.34299	3.84838	0.34299	4.87166	0.34299
3.29699	0.34424	3.82319	0.34424	4.84722	0.34424
3.29435	0.34549	3.79575	0.34549	4.82338	0.34549
3.29141	0.34674	3.76635	0.34674	4.80006	0.34674
3.28802	0.34799	3.73531	0.34799	4.77744	0.34799
3.28416	0.34924	3.70274	0.34924	4.75533	0.34924
3.27979	0.35049	3.66894	0.35049	4.73417	0.35049
3.27506	0.35174	3.6343	0.35174	4.71428	0.35174
3.27016	0.35299	3.59909	0.35299	4.69623	0.35299
3.26517	0.354239	3.56321	0.354239	4.68018	0.354239
3.26049	0.355489	3.52721	0.355489	4.66605	0.355489
3.2562	0.356739	3.49122	0.356739	4.65408	0.356739
3.25228	0.357989	3.4556	0.357989	4.64377	0.357989
3.24865	0.359239	3.42059	0.359239	4.63469	0.359239
3.24546	0.360489	3.38659	0.360489	4.62685	0.360489
3.24272	0.361739	3.35393	0.361739	4.62004	0.361739
3.24031	0.362989	3.32299	0.362989	4.61418	0.362989
3.23851	0.364239	3.29396	0.364239	4.60922	0.364239
3.23718	0.365489	3.26705	0.365489	4.60491	0.365489
3.23635	0.366739	3.24244	0.366739	4.60104	0.366739
3.23613	0.367989	3.22039	0.367989	4.59754	0.367989
3.23641	0.369239	3.20093	0.369239	4.59406	0.369239
3.23708	0.370489	3.18408	0.370489	4.5902	0.370489
3.23807	0.371739	3.17011	0.371739	4.58587	0.371739
3.23927	0.372989	3.15916	0.372989	4.5813	0.372989
3.24078	0.374239	3.15146	0.374239	4.5762	0.374239
3.24264	0.375489	3.14688	0.375489	4.5703	0.375489
3.24469	0.376739	3.14506	0.376739	4.56349	0.376739
3.24687	0.377989	3.14596	0.377989	4.55585	0.377989
3.24901	0.379239	3.14934	0.379239	4.54741	0.379239
3.25113	0.380489	3.15508	0.380489	4.53809	0.380489
3.25331	0.381739	3.16317	0.381739	4.52809	0.381739
3.25545	0.382989	3.17323	0.382989	4.51715	0.382989
3.25737	0.384239	3.18468	0.384239	4.50537	0.384239
3.25916	0.385489	3.1973	0.385489	4.49257	0.385489
3.26116	0.386738	3.2107	0.386738	4.47901	0.386738
3.26325	0.387988	3.22452	0.387988	4.46451	0.387988
3.2653	0.389238	3.23849	0.389238	4.44899	0.389238
3.26739	0.390488	3.25237	0.390488	4.43246	0.390488
3.26911	0.391738	3.26574	0.391738	4.41485	0.391738
3.27013	0.392988	3.27835	0.392988	4.39605	0.392988
3.27006	0.394238	3.28987	0.394238	4.376	0.394238
3.26867	0.395488	3.30011	0.395488	4.35515	0.395488
3.26571	0.396738	3.30879	0.396738	4.3333	0.396738
3.26111	0.397988	3.31583	0.397988	4.31084	0.397988
3.25463	0.399238	3.32129	0.399238	4.28793	0.399238
3.24628	0.400488	3.325	0.400488	4.26466	0.400488
3.23594	0.401738	3.327	0.401738	4.24116	0.401738
3.22357	0.402988	3.32726	0.402988	4.21736	0.402988
3.20916	0.404238	3.3257	0.404238	4.19346	0.404238
3.19281	0.405488	3.32241	0.405488	4.16986	0.405488
3.17476	0.406738	3.31769	0.406738	4.14646	0.406738
3.15501	0.407988	3.31154	0.407988	4.12332	0.407988
3.13388	0.409238	3.30387	0.409238	4.10058	0.409238
3.11151	0.410488	3.29473	0.410488	4.07866	0.410488
3.0883	0.411738	3.28416	0.411738	4.0578	0.411738
3.06441	0.412988	3.27239	0.412988	4.03852	0.412988
3.04025	0.414238	3.25943	0.414238	4.0208	0.414238
3.01596	0.415488	3.24536	0.415488	4.00485	0.415488
2.99179	0.416738	3.23022	0.416738	3.9903	0.416738
2.96781	0.417988	3.2144	0.417988	3.97701	0.417988
2.94414	0.419238	3.19796	0.419238	3.96497	0.419238
2.92077	0.420487	3.18124	0.420487	3.95396	0.420487
2.8978	0.421737	3.16451	0.421737	3.94423	0.421737
2.8755	0.422987	3.1479	0.422987	3.93599	0.422987
2.85394	0.424237	3.13157	0.424237	3.92919	0.424237
2.83316	0.425487	3.11578	0.425487	3.92378	0.425487
2.81352	0.426737	3.10053	0.426737	3.9197	0.426737
2.79509	0.427987	3.08614	0.427987	3.91676	0.427987
2.77808	0.429237	3.07271	0.429237	3.91511	0.429237
2.76259	0.430487	3.06054	0.430487	3.91465	0.430487
2.7486	0.431737	3.04978	0.431737	3.91529	0.431737
2.73624	0.432987	3.04076	0.432987	3.91719	0.432987
2.7256	0.434237	3.03382	0.434237	3.92048	0.434237
2.71686	0.435487	3.02907	0.435487	3.92537	0.435487
2.71013	0.436737	3.02622	0.436737	3.93163	0.436737
2.70521	0.437987	3.02495	0.437987	3.93925	0.437987
2.70213	0.439237	3.02508	0.439237	3.94859	0.439237
2.70093	0.440487	3.02662	0.440487	3.95949	0.440487
2.70156	0.441737	3.02937	0.441737	3.97174	0.441737
2.70407	0.442987	3.03321	0.442987	3.985	0.442987
2.70831	0.444237	3.0381	0.444237	3.99902	0.444237
2.71416	0.445487	3.04379	0.445487	4.01343	0.445487
2.72145	0.446737	3.05009	0.446737	4.02795	0.446737
2.73005	0.447987	3.05697	0.447987	4.04212	0.447987
2.73971	0.449237	3.06404	0.449237	4.05584	0.449237
2.74979	0.450487	3.07129	0.450487	4.06871	0.450487
2.7599	0.451737	3.0786	0.451737	4.08062	0.451737
2.76972	0.452987	3.0858	0.452987	4.09128	0.452987
2.77879	0.454236	3.0927	0.454236	4.1005	0.454236
2.78691	0.455486	3.09954	0.455486	4.10845	0.455486
2.79385	0.456736	3.10612	0.456736	4.11497	0.456736
2.7996	0.457986	3.11246	0.457986	4.12005	0.457986
2.804	0.459236	3.11863	0.459236	4.12309	0.459236
2.80696	0.460486	3.12462	0.460486	4.12422	0.460486
2.80829	0.461736	3.13024	0.461736	4.12313	0.461736
2.80809	0.462986	3.13537	0.462986	4.11984	0.462986
2.80615	0.464236	3.14004	0.464236	4.11441	0.464236
2.80251	0.465486	3.14433	0.465486	4.10686	0.465486
2.7971	0.466736	3.14813	0.466736	4.09754	0.466736
2.78995	0.467986	3.15144	0.467986	4.08649	0.467986
2.78119	0.469236	3.15422	0.469236	4.07363	0.469236
2.77077	0.470486	3.15626	0.470486	4.05921	0.470486
2.75871	0.471736	3.15762	0.471736	4.04323	0.471736
2.74499	0.472986	3.15827	0.472986	4.02587	0.472986
2.72963	0.474236	3.15822	0.474236	4.0072	0.474236
2.7126	0.475486	3.15736	0.475486	3.98717	0.475486
2.69403	0.476736	3.1555	0.476736	3.9657	0.476736
2.67402	0.477986	3.15278	0.477986	3.94298	0.477986
2.65279	0.479236	3.14903	0.479236	3.91902	0.479236
2.63037	0.480486	3.14433	0.480486	3.89399	0.480486
2.60712	0.481736	3.13865	0.481736	3.868	0.481736
2.58313	0.482986	3.13201	0.482986	3.84131	0.482986
2.55875	0.484236	3.12432	0.484236	3.81419	0.484236
2.53433	0.485486	3.11543	0.485486	3.78666	0.485486
2.51006	0.486735	3.10552	0.486735	3.75875	0.486735
2.48629	0.487985	3.09458	0.487985	3.7306	0.487985
2.46331	0.489235	3.08261	0.489235	3.70241	0.489235
2.44117	0.490485	3.06975	0.490485	3.67434	0.490485
2.41988	0.491735	3.05603	0.491735	3.64663	0.491735
2.39962	0.492985	3.04166	0.492985	3.6193	0.492985
2.38058	0.494235	3.02667	0.494235	3.59271	0.494235
2.36298	0.495485	3.01102	0.495485	3.56701	0.495485
2.34686	0.496735	2.99448	0.496735	3.54226	0.496735
2.33243	0.497985	2.97669	0.497985	3.51877	0.497985
2.31954	0.499235	2.95739	0.499235	3.49652	0.499235
2.3081	0.500485	2.93671	0.500485	3.47562	0.500485
2.29843	0.501735	2.91487	0.501735	3.45607	0.501735
2.29043	0.502985	2.89187	0.502985	3.43744	0.502985
2.28403	0.504235	2.86781	0.504235	3.41969	0.504235
2.27899	0.505485	2.84276	0.505485	3.40263	0.505485
2.27517	0.506735	2.81693	0.506735	3.3864	0.506735
2.27242	0.507985	2.79039	0.507985	3.37095	0.507985
2.27051	0.509235	2.76315	0.509235	3.35618	0.509235
2.26919	0.510485	2.73534	0.510485	3.34218	0.510485
2.26835	0.511735	2.70712	0.511735	3.32903	0.511735
2.26777	0.512985	2.67868	0.512985	3.31676	0.512985
2.2675	0.514235	2.65019	0.514235	3.30543	0.514235
2.2676	0.515485	2.62187	0.515485	3.29513	0.515485
2.26801	0.516735	2.59405	0.516735	3.28608	0.516735
2.26872	0.517985	2.56705	0.517985	3.27836	0.517985
2.26963	0.519235	2.54086	0.519235	3.27171	0.519235
2.27077	0.520484	2.51597	0.520484	3.26645	0.520484
2.27207	0.521734	2.49261	0.521734	3.26257	0.521734
2.27351	0.522984	2.47076	0.522984	3.26013	0.522984
2.27497	0.524234	2.45067	0.524234	3.2591	0.524234
2.27655	0.525484	2.43266	0.525484	3.25962	0.525484
2.27814	0.526734	2.41704	0.526734	3.26156	0.526734
2.27979	0.527984	2.40394	0.527984	3.26502	0.527984
2.28149	0.529234	2.39314	0.529234	3.27	0.529234
2.28326	0.530484	2.38483	0.530484	3.27626	0.530484
2.28507	0.531734	2.379	0.531734	3.28381	0.531734
2.28674	0.532984	2.37557	0.532984	3.29256	0.532984
2.28818	0.534234	2.37458	0.534234	3.30226	0.534234
2.28965	0.535484	2.3759	0.535484	3.31298	0.535484
2.29128	0.536734	2.37931	0.536734	3.3245	0.536734
2.29327	0.537984	2.38466	0.537984	3.33664	0.537984
2.29565	0.539234	2.39184	0.539234	3.34945	0.539234
2.29851	0.540484	2.40081	0.540484	3.36283	0.540484
2.30187	0.541734	2.41128	0.541734	3.3766	0.541734
2.30578	0.542984	2.42322	0.542984	3.39043	0.542984
2.31056	0.544234	2.43636	0.544234	3.40427	0.544234
2.31617	0.545484	2.45058	0.545484	3.41821	0.545484
2.32269	0.546734	2.46562	0.546734	3.43195	0.546734
2.33003	0.547984	2.48135	0.547984	3.44517	0.547984
2.33808	0.549234	2.49774	0.549234	3.45778	0.549234
2.34696	0.550484	2.51454	0.550484	3.46962	0.550484
2.35637	0.551734	2.53166	0.551734	3.48062	0.551734
2.36622	0.552983	2.54891	0.552983	3.49057	0.552983
2.3765	0.554233	2.56605	0.554233	3.49934	0.554233
2.3874	0.555483	2.58283	0.555483	3.5068	0.555483
2.39883	0.556733	2.59884	0.556733	3.5129	0.556733
2.41062	0.557983	2.61359	0.557983	3.51733	0.557983
2.4225	0.559233	2.62675	0.559233	3.51997	0.559233
2.43439	0.560483	2.63813	0.560483	3.52076	0.560483
2.44608	0.561733	2.64765	0.561733	3.51946	0.561733
2.45757	0.562983	2.65535	0.562983	3.51597	0.562983
2.46894	0.564233	2.66107	0.564233	3.51007	0.564233
2.4797	0.565483	2.66452	0.565483	3.50184	0.565483
2.48976	0.566733	2.66566	0.566733	3.49133	0.566733
2.49883	0.567983	2.66433	0.567983	3.47852	0.567983
2.50692	0.569233	2.66052	0.569233	3.46374	0.569233
2.5139	0.570483	2.6541	0.570483	3.44687	0.570483
2.51973	0.571733	2.64499	0.571733	3.42807	0.571733
2.52436	0.572983	2.63333	0.572983	3.40768	0.572983
2.52798	0.574233	2.6193	0.574233	3.38581	0.574233
2.5305	0.575483	2.60295	0.575483	3.36278	0.575483
2.53186	0.576733	2.58461	0.576733	3.33888	0.576733
2.53205	0.577983	2.56449	0.577983	3.31441	0.577983
2.53094	0.579233	2.54289	0.579233	3.28945	0.579233
2.52856	0.580483	2.52014	0.580483	3.26418	0.580483
2.52486	0.581733	2.49663	0.581733	3.23882	0.581733
2.51998	0.582983	2.47284	0.582983	3.21369	0.582983
2.51394	0.584233	2.44877	0.584233	3.18866	0.584233
2.50677	0.585483	2.42459	0.585483	3.16385	0.585483
2.49852	0.586732	2.40082	0.586732	3.13961	0.586732
2.48951	0.587982	2.37761	0.587982	3.11607	0.587982
2.47971	0.589232	2.35502	0.589232	3.0935	0.589232
2.46915	0.590482	2.33308	0.590482	3.07229	0.590482
2.45786	0.591732	2.31195	0.591732	3.0525	0.591732
2.4458	0.592982	2.29207	0.592982	3.03424	0.592982
2.43294	0.594232	2.27353	0.594232	3.01778	0.594232
2.41931	0.595482	2.25651	0.595482	3.00315	0.595482
2.40525	0.596732	2.24126	0.596732	2.99052	0.596732
2.39104	0.597982	2.22791	0.597982	2.98005	0.597982
2.37661	0.599232	2.21657	0.599232	2.97167	0.599232
2.362	0.600482	2.20753	0.600482	2.96545	0.600482
2.34716	0.601732	2.20087	0.601732	2.96143	0.601732
2.33224	0.602982	2.19677	0.602982	2.95952	0.602982
2.31733	0.604232	2.19535	0.604232	2.95974	0.604232
2.30249	0.605482	2.19664	0.605482	2.96192	0.605482
2.28783	0.606732	2.20069	0.606732	2.96624	0.606732
2.27304	0.607982	2.20767	0.607982	2.97267	0.607982
2.25814	0.609232	2.21745	0.609232	2.98074	0.609232
2.24314	0.610482	2.23003	0.610482	2.99026	0.610482
2.22816	0.611732	2.24528	0.611732	3.00109	0.611732
2.21329	0.612982	2.26296	0.612982	3.01308	0.612982
2.19841	0.614232	2.28276	0.614232	3.02611	0.614232
2.18373	0.615482	2.30424	0.615482	3.03983	0.615482
2.16923	0.616732	2.3269	0.616732	3.05404	0.616732
2.15491	0.617982	2.35031	0.617982	3.06841	0.617982
2.14051	0.619232	2.37402	0.619232	3.08279	0.619232
2.12602	0.620481	2.39758	0.620481	3.09689	0.620481
2.11149	0.621731	2.42078	0.621731	3.11065	0.621731
2.09712	0.622981	2.44346	0.622981	3.1239	0.622981
2.08289	0.624231	2.4653	0.624231	3.13639	0.624231
2.06871	0.625481	2.48605	0.625481	3.14796	0.625481
2.05449	0.626731	2.50521	0.626731	3.15849	0.626731
2.04007	0.627981	2.52239	0.627981	3.16799	0.627981
2.02564	0.629231	2.53724	0.629231	3.17624	0.629231
2.01102	0.630481	2.54953	0.630481	3.18322	0.630481
1.99639	0.631731	2.55912	0.631731	3.18894	0.631731
1.98179	0.632981	2.56582	0.632981	3.1931	0.632981
1.96726	0.634231	2.56957	0.634231	3.1959	0.634231
1.95292	0.635481	2.5704	0.635481	3.19724	0.635481
1.93874	0.636731	2.56837	0.636731	3.19695	0.636731
1.92452	0.637981	2.56347	0.637981	3.19525	0.637981
1.9103	0.639231	2.55598	0.639231	3.19194	0.639231
1.89633	0.640481	2.546	0.640481	3.18708	0.640481
1.88256	0.641731	2.53385	0.641731	3.18075	0.641731
1.86909	0.642981	2.51971	0.642981	3.17321	0.642981
1.85591	0.644231	2.50365	0.644231	3.16463	0.644231
1.84309	0.645481	2.48564	0.645481	3.15513	0.645481
1.83066	0.646731	2.46568	0.646731	3.14489	0.646731
1.81869	0.647981	2.44402	0.647981	3.13424	0.647981
1.80717	0.649231	2.42101	0.649231	3.12338	0.649231
1.79617	0.650481	2.39666	0.650481	3.11244	0.650481
1.78546	0.651731	2.37128	0.651731	3.10168	0.651731
1.77494	0.65298	2.34526	0.65298	3.09108	0.65298
1.7645	0.65423	2.31906	0.65423	3.08064	0.65423
1.75423	0.65548	2.29297	0.65548	3.07062	0.65548
1.74419	0.65673	2.26718	0.65673	3.06128	0.65673
1.73448	0.65798	2.24197	0.65798	3.0527	0.65798
1.72534	0.65923	2.21775	0.65923	3.04494	0.65923
1.71653	0.66048	2.19478	0.66048	3.03801	0.66048
1.70792	0.66173	2.17339	0.66173	3.03191	0.66173
1.69952	0.66298	2.15394	0.66298	3.02689	0.66298
1.69126	0.66423	2.13648	0.66423	3.02302	0.66423
1.68318	0.66548	2.12124	0.66548	3.02057	0.66548
1.6753	0.66673	2.10829	0.66673	3.01954	0.66673
1.66761	0.66798	2.09767	0.66798	3.01979	0.66798
1.66015	0.66923	2.0895	0.66923	3.02139	0.66923
1.65296	0.67048	2.08372	0.67048	3.02417	0.67048
1.64642	0.67173	2.0801	0.67173	3.02769	0.67173
1.64058	0.67298	2.07847	0.67298	3.03201	0.67298
1.6356	0.67423	2.07856	0.67423	3.0371	0.67423
1.63143	0.67548	2.08011	0.67548	3.04316	0.67548
1.62804	0.67673	2.08275	0.67673	3.0499	0.67673
1.62545	0.67798	2.08623	0.67798	3.05709	0.67798
1.62358	0.67923	2.09032	0.67923	3.06467	0.67923
1.62256	0.68048	2.09499	0.68048	3.07243	0.68048
1.62249	0.68173	2.10006	0.68173	3.0805	0.68173
1.62353	0.68298	2.1054	0.68298	3.08859	0.68298
1.62565	0.68423	2.11104	0.68423	3.09653	0.68423
1.62876	0.68548	2.11671	0.68548	3.10408	0.68548
1.63271	0.686729	2.12207	0.686729	3.11116	0.686729
1.63757	0.687979	2.12704	0.687979	3.11787	0.687979
1.64347	0.689229	2.13123	0.689229	3.12417	0.689229
1.65052	0.690479	2.1346	0.690479	3.12987	0.690479
1.65879	0.691729	2.13699	0.691729	3.13476	0.691729
1.6682	0.692979	2.13854	0.692979	3.13877	0.692979
1.67905	0.694229	2.13922	0.694229	3.14189	0.694229
1.69124	0.695479	2.13904	0.695479	3.14403	0.695479
1.70478	0.696729	2.13805	0.696729	3.14531	0.696729
1.71954	0.697979	2.13633	0.697979	3.14565	0.697979
1.73529	0.699229	2.13409	0.699229	3.14524	0.699229
1.75203	0.700479	2.13132	0.700479	3.14436	0.700479
1.7697	0.701729	2.12829	0.701729	3.14286	0.701729
1.78824	0.702979	2.125	0.702979	3.14118	0.702979
1.8072	0.704229	2.12142	0.704229	3.13937	0.704229
1.8265	0.705479	2.11745	0.705479	3.13751	0.705479
1.84603	0.706729	2.11302	0.706729	3.13543	0.706729
1.86571	0.707979	2.10816	0.707979	3.13307	0.707979
1.8854	0.709229	2.10298	0.709229	3.13038	0.709229
1.90497	0.710479	2.09763	0.710479	3.12738	0.710479
1.92416	0.711729	2.09231	0.711729	3.12401	0.711729
1.94296	0.712979	2.08699	0.712979	3.12025	0.712979
1.96101	0.714229	2.08196	0.714229	3.11607	0.714229
1.97812	0.715479	2.07722	0.715479	3.11154	0.715479
1.99428	0.716729	2.07288	0.716729	3.10687	0.716729
2.00943	0.717979	2.06892	0.717979	3.10223	0.717979
2.02338	0.719229	2.06546	0.719229	3.09755	0.719229
2.03609	0.720478	2.06268	0.720478	3.09273	0.720478
2.04739	0.721728	2.06079	0.721728	3.0877	0.721728
2.05686	0.722978	2.05974	0.722978	3.08265	0.722978
2.06461	0.724228	2.0594	0.724228	3.07745	0.724228
2.07063	0.725478	2.05974	0.725478	3.07224	0.725478
2.07492	0.726728	2.06058	0.726728	3.06682	0.726728
2.07773	0.727978	2.062	0.727978	3.06121	0.727978
2.07915	0.729228	2.064	0.729228	3.05501	0.729228
2.07929	0.730478	2.06645	0.730478	3.04796	0.730478
2.07814	0.731728	2.06925	0.731728	3.04005	0.731728
2.07587	0.732978	2.07228	0.732978	3.031	0.732978
2.07253	0.734228	2.07539	0.734228	3.02072	0.734228
2.06795	0.735478	2.07839	0.735478	3.00937	0.735478
2.0622	0.736728	2.08113	0.736728	2.99693	0.736728
2.0551	0.737978	2.08355	0.737978	2.98337	0.737978
2.04668	0.739228	2.08561	0.739228	2.96821	0.739228
2.03701	0.740478	2.08741	0.740478	2.95167	0.740478
2.02632	0.741728	2.08893	0.741728	2.93374	0.741728
2.01471	0.742978	2.09019	0.742978	2.91439	0.742978
2.00206	0.744228	2.09099	0.744228	2.89375	0.744228
1.98838	0.745478	2.09135	0.745478	2.87157	0.745478
1.97368	0.746728	2.09123	0.746728	2.84813	0.746728
1.95813	0.747978	2.09063	0.747978	2.82374	0.747978
1.94197	0.749228	2.08956	0.749228	2.79868	0.749228
1.92558	0.750478	2.08807	0.750478	2.77309	0.750478
1.90893	0.751728	2.08602	0.751728	2.74687	0.751728
1.89215	0.752977	2.08363	0.752977	2.72003	0.752977
1.87527	0.754227	2.08092	0.754227	2.69285	0.754227
1.8583	0.755477	2.07816	0.755477	2.66553	0.755477
1.84139	0.756727	2.07535	0.756727	2.63838	0.756727
1.82437	0.757977	2.07257	0.757977	2.61154	0.757977
1.80726	0.759227	2.06998	0.759227	2.58515	0.759227
1.78992	0.760477	2.06772	0.760477	2.55944	0.760477
1.77236	0.761727	2.06604	0.761727	2.53446	0.761727
1.7547	0.762977	2.06484	0.762977	2.5103	0.762977
1.73687	0.764227	2.0643	0.764227	2.48694	0.764227
1.71905	0.765477	2.06424	0.765477	2.46468	0.765477
1.70115	0.766727	2.06467	0.766727	2.4433	0.766727
1.68344	0.767977	2.06563	0.767977	2.42282	0.767977
1.66601	0.769227	2.06714	0.769227	2.40322	0.769227
1.64881	0.770477	2.06926	0.770477	2.38467	0.770477
1.63186	0.771727	2.07208	0.771727	2.36737	0.771727
1.61517	0.772977	2.07566	0.772977	2.35145	0.772977
1.59875	0.774227	2.08011	0.774227	2.33693	0.774227
1.58262	0.775477	2.08533	0.775477	2.32387	0.775477
1.56655	0.776727	2.09138	0.776727	2.31239	0.776727
1.55068	0.777977	2.09813	0.777977	2.30249	0.777977
1.53507	0.779227	2.1058	0.779227	2.29407	0.779227
1.51972	0.780477	2.11431	0.780477	2.28687	0.780477
1.50465	0.781727	2.12362	0.781727	2.28074	0.781727
1.48996	0.782977	2.13375	0.782977	2.27558	0.782977
1.47558	0.784227	2.14459	0.784227	2.27136	0.784227
1.46163	0.785477	2.15585	0.785477	2.26794	0.785477
1.4485	0.786726	2.16747	0.786726	2.26494	0.786726
1.43625	0.787976	2.17954	0.787976	2.26245	0.787976
1.425	0.789226	2.19185	0.789226	2.26016	0.789226
1.41495	0.790476	2.20445	0.790476	2.25812	0.790476
1.40596	0.791726	2.21712	0.791726	2.25598	0.791726
1.39804	0.792976	2.22955	0.792976	2.25373	0.792976
1.39102	0.794226	2.24167	0.794226	2.25152	0.794226
1.38503	0.795476	2.2533	0.795476	2.24922	0.795476
1.37994	0.796726	2.26405	0.796726	2.24683	0.796726
1.37565	0.797976	2.27369	0.797976	2.24435	0.797976
1.37206	0.799226	2.28215	0.799226	2.24177	0.799226
1.3691	0.800476	2.28938	0.800476	2.23899	0.800476
1.36686	0.801726	2.29523	0.801726	2.23606	0.801726
1.36533	0.802976	2.29955	0.802976	2.2332	0.802976
1.36445	0.804226	2.30212	0.804226	2.23031	0.804226
1.36405	0.805476	2.30282	0.805476	2.22747	0.805476
1.36403	0.806726	2.30154	0.806726	2.22476	0.806726
1.36459	0.807976	2.29839	0.807976	2.22218	0.807976
1.36576	0.809226	2.2934	0.809226	2.22013	0.809226
1.36759	0.810476	2.2866	0.810476	2.21847	0.810476
1.37012	0.811726	2.27783	0.811726	2.21702	0.811726
1.37326	0.812976	2.26711	0.812976	2.21556	0.812976
1.37671	0.814226	2.25456	0.814226	2.21413	0.814226
1.38045	0.815476	2.24038	0.815476	2.21275	0.815476
1.38437	0.816726	2.22451	0.816726	2.21142	0.816726
1.38828	0.817976	2.20712	0.817976	2.21007	0.817976
1.3922	0.819226	2.18819	0.819226	2.20882	0.819226
1.39588	0.820475	2.16793	0.820475	2.20755	0.820475
1.39925	0.821725	2.14665	0.821725	2.20615	0.821725
1.40218	0.822975	2.12448	0.822975	2.20468	0.822975
1.40473	0.824225	2.10154	0.824225	2.20304	0.824225
1.40694	0.825475	2.07775	0.825475	2.20131	0.825475
1.40876	0.826725	2.05334	0.826725	2.19946	0.826725
1.41022	0.827975	2.0283	0.827975	2.19747	0.827975
1.41108	0.829225	2.00295	0.829225	2.19513	0.829225
1.41141	0.830475	1.97744	0.830475	2.19253	0.830475
1.41117	0.831725	1.95194	0.831725	2.1897	0.831725
1.4103	0.832975	1.92671	0.832975	2.18663	0.832975
1.40889	0.834225	1.90202	0.834225	2.18331	0.834225
1.40691	0.835475	1.87802	0.835475	2.17953	0.835475
1.40429	0.836725	1.85497	0.836725	2.17521	0.836725
1.40101	0.837975	1.83292	0.837975	2.17037	0.837975
1.39705	0.839225	1.81205	0.839225	2.1649	0.839225
1.3926	0.840475	1.79249	0.840475	2.15864	0.840475
1.38769	0.841725	1.77433	0.841725	2.15157	0.841725
1.38246	0.842975	1.75753	0.842975	2.14372	0.842975
1.377	0.844225	1.74219	0.844225	2.13538	0.844225
1.37142	0.845475	1.72846	0.845475	2.12654	0.845475
1.36581	0.846725	1.71619	0.846725	2.11737	0.846725
1.36037	0.847975	1.70535	0.847975	2.10787	0.847975
1.35526	0.849225	1.69595	0.849225	2.09819	0.849225
1.35044	0.850475	1.68793	0.850475	2.0887	0.850475
1.34601	0.851725	1.68104	0.851725	2.07933	0.851725
1.34212	0.852974	1.67531	0.852974	2.07045	0.852974
1.33863	0.854224	1.6704	0.854224	2.06204	0.854224
1.33557	0.855474	1.66621	0.855474	2.05434	0.855474
1.33286	0.856724	1.66264	0.856724	2.04743	0.856724
1.33071	0.857974	1.65942	0.857974	2.04123	0.857974
1.32898	0.859224	1.6564	0.859224	2.03582	0.859224
1.32764	0.860474	1.65372	0.860474	2.03134	0.860474
1.32664	0.861724	1.65135	0.861724	2.02788	0.861724
1.32607	0.862974	1.64919	0.862974	2.02543	0.862974
1.32584	0.864224	1.64715	0.864224	2.0243	0.864224
1.32582	0.865474	1.64524	0.865474	2.02439	0.865474
1.32599	0.866724	1.64352	0.866724	2.02574	0.866724
1.32637	0.867974	1.64187	0.867974	2.02839	0.867974
1.32691	0.869224	1.64036	0.869224	2.03231	0.869224
1.32772	0.870474	1.63915	0.870474	2.03733	0.870474
1.32864	0.871724	1.63814	0.871724	2.04349	0.871724
1.32958	0.872974	1.63726	0.872974	2.05039	0.872974
1.33043	0.874224	1.63646	0.874224	2.05803	0.874224
1.33096	0.875474	1.63587	0.875474	2.0664	0.875474
1.33099	0.876724	1.63549	0.876724	2.07544	0.876724
1.33055	0.877974	1.63522	0.877974	2.08494	0.877974
1.32946	0.879224	1.63508	0.879224	2.09488	0.879224
1.32759	0.880474	1.63518	0.880474	2.10518	0.880474
1.32502	0.881724	1.63561	0.881724	2.11585	0.881724
1.32153	0.882974	1.63649	0.882974	2.12651	0.882974
1.31712	0.884224	1.6379	0.884224	2.13699	0.884224
1.31187	0.885474	1.63965	0.885474	2.14718	0.885474
1.3058	0.886723	1.64177	0.886723	2.1568	0.886723
1.29895	0.887973	1.64427	0.887973	2.16573	0.887973
1.29123	0.889223	1.64731	0.889223	2.17372	0.889223
1.28272	0.890473	1.65094	0.890473	2.18058	0.890473
1.27342	0.891723	1.65543	0.891723	2.18619	0.891723
1.26359	0.892973	1.66078	0.892973	2.19063	0.892973
1.25329	0.894223	1.66713	0.894223	2.19377	0.894223
1.24246	0.895473	1.67446	0.895473	2.1955	0.895473
1.23119	0.896723	1.68278	0.896723	2.19577	0.896723
1.21946	0.897973	1.69207	0.897973	2.19464	0.897973
1.20737	0.899223	1.70219	0.899223	2.19212	0.899223
1.19513	0.900473	1.71291	0.900473	2.18824	0.900473
1.18285	0.901723	1.724	0.901723	2.18297	0.901723
1.17073	0.902973	1.73536	0.902973	2.17634	0.902973
1.15889	0.904223	1.74675	0.904223	2.1686	0.904223
1.14748	0.905473	1.75815	0.905473	2.15994	0.905473
1.13657	0.906723	1.76934	0.906723	2.15057	0.906723
1.12632	0.907973	1.78014	0.907973	2.14037	0.907973
1.11689	0.909223	1.79019	0.909223	2.12954	0.909223
1.10849	0.910473	1.79938	0.910473	2.11806	0.910473
1.10135	0.911723	1.80751	0.911723	2.10611	0.911723
1.09543	0.912973	1.81443	0.912973	2.09377	0.912973
1.0908	0.914223	1.82001	0.914223	2.08099	0.914223
1.08744	0.915473	1.82416	0.915473	2.06797	0.915473
1.08512	0.916723	1.82677	0.916723	2.05454	0.916723
1.08386	0.917973	1.82794	0.917973	2.04073	0.917973
1.08372	0.919223	1.82762	0.919223	2.02645	0.919223
1.08473	0.920472	1.8258	0.920472	2.01172	0.920472
1.08667	0.921722	1.82259	0.921722	1.99675	0.921722
1.08952	0.922972	1.81815	0.922972	1.98163	0.922972
1.09325	0.924222	1.81228	0.924222	1.96645	0.924222
1.09779	0.925472	1.80504	0.925472	1.9513	0.925472
1.10303	0.926722	1.79664	0.926722	1.93636	0.926722
1.109	0.927972	1.78708	0.927972	1.92143	0.927972
1.11564	0.929222	1.77644	0.929222	1.90669	0.929222
1.12293	0.930472	1.76466	0.930472	1.89209	0.930472
1.13076	0.931722	1.75217	0.931722	1.87762	0.931722
1.13917	0.932972	1.73894	0.932972	1.86331	0.932972
1.14793	0.934222	1.725	0.934222	1.84941	0.934222
1.15692	0.935472	1.71043	0.935472	1.83578	0.935472
1.16604	0.936722	1.69528	0.936722	1.82259	0.936722
1.17512	0.937972	1.67964	0.937972	1.80967	0.937972
1.18403	0.939222	1.66363	0.939222	1.79705	0.939222
1.19269	0.940472	1.64741	0.940472	1.78481	0.940472
1.20093	0.941722	1.63114	0.941722	1.77303	0.941722
1.20864	0.942972	1.61489	0.942972	1.76162	0.942972
1.21577	0.944222	1.59879	0.944222	1.75052	0.944222
1.22202	0.945472	1.58293	0.945472	1.73955	0.945472
1.22743	0.946722	1.56736	0.946722	1.72879	0.946722
1.232	0.947972	1.55215	0.947972	1.71826	0.947972
1.23559	0.949222	1.53751	0.949222	1.70798	0.949222
1.23808	0.950472	1.52355	0.950472	1.69809	0.950472
1.23936	0.951722	1.5104	0.951722	1.68861	0.951722
1.23952	0.952971	1.49827	0.952971	1.67965	0.952971
1.2385	0.954221	1.48721	0.954221	1.67158	0.954221
1.23639	0.955471	1.47712	0.955471	1.66453	0.955471
1.23302	0.956721	1.46787	0.956721	1.65847	0.956721
1.22847	0.957971	1.45937	0.957971	1.65346	0.957971
1.22285	0.959221	1.45158	0.959221	1.64961	0.959221
1.21617	0.960471	1.44426	0.960471	1.64691	0.960471
1.20855	0.961721	1.43717	0.961721	1.6452	0.961721
1.20007	0.962971	1.43022	0.962971	1.64459	0.962971
1.19067	0.964221	1.42337	0.964221	1.64506	0.964221
1.18049	0.965471	1.4167	0.965471	1.64666	0.965471
1.1696	0.966721	1.41008	0.966721	1.64961	0.966721
1.158	0.967971	1.4036	0.967971	1.65385	0.967971
1.1458	0.969221	1.39703	0.969221	1.65923	0.969221
1.13318	0.970471	1.39038	0.970471	1.66547	0.970471
1.12031	0.971721	1.38352	0.971721	1.67255	0.971721
1.1072	0.972971	1.37659	0.972971	1.68033	0.972971
1.09387	0.974221	1.36954	0.974221	1.68875	0.974221
1.08018	0.975471	1.36246	0.975471	1.69765	0.975471
1.06627	0.976721	1.3555	0.976721	1.70688	0.976721
1.05222	0.977971	1.34865	0.977971	1.71634	0.977971
1.03825	0.979221	1.34205	0.979221	1.72585	0.979221
1.02465	0.980471	1.33565	0.980471	1.73528	0.980471
1.0116	0.981721	1.32935	0.981721	1.7446	0.981721
0.99921	0.982971	1.32326	0.982971	1.75384	0.982971
0.98764	0.984221	1.31752	0.984221	1.76306	0.984221
0.97717	0.985471	1.31213	0.985471	1.77207	0.985471
0.96796	0.98672	1.30705	0.98672	1.78089	0.98672
0.96018	0.98797	1.30255	0.98797	1.78952	0.98797
0.95409	0.98922	1.29872	0.98922	1.79796	0.98922
0.94978	0.99047	1.29546	0.99047	1.80603	0.99047
0.94731	0.99172	1.29283	0.99172	1.81387	0.99172
0.9469	0.99297	1.29086	0.99297	1.82136	0.99297
0.94857	0.99422	1.28969	0.99422	1.82855	0.99422
0.95236	0.99547	1.28904	0.99547	1.83547	0.99547
0.95815	0.99672	1.28902	0.99672	1.84207	0.99672
0.96593	0.99797	1.28949	0.99797	1.84808	0.99797
0.97557	0.99922	1.29044	0.99922	1.85354	0.99922
0.9869	1.00047	1.29198	1.00047	1.85833	1.00047
0.99985	1.00172	1.29409	1.00172	1.86275	1.00172
1.01427	1.00297	1.29676	1.00297	1.8668	1.00297
1.03004	1.00422	1.29982	1.00422	1.87036	1.00422
1.04706	1.00547	1.30316	1.00547	1.87338	1.00547
1.06515	1.00672	1.30675	1.00672	1.87579	1.00672
1.08417	1.00797	1.31045	1.00797	1.87771	1.00797
1.10419	1.00922	1.31413	1.00922	1.87924	1.00922
1.125	1.01047	1.31777	1.01047	1.88045	1.01047
1.14638	1.01172	1.32131	1.01172	1.88157	1.01172
1.16823	1.01297	1.32467	1.01297	1.88266	1.01297
1.19048	1.01422	1.32779	1.01422	1.88379	1.01422
1.21317	1.01547	1.33065	1.01547	1.88519	1.01547
1.23625	1.01672	1.33294	1.01672	1.887	1.01672
1.25952	1.01797	1.33452	1.01797	1.88888	1.01797
1.28268	1.01922	1.33522	1.01922	1.8907	1.01922
1.30558	1.02047	1.33494	1.02047	1.89252	1.02047
1.32789	1.02172	1.33353	1.02172	1.89424	1.02172
1.34938	1.02297	1.3309	1.02297	1.89571	1.02297
1.36989	1.02422	1.32708	1.02422	1.89699	1.02422
1.38914	1.02547	1.32215	1.02547	1.89816	1.02547
1.40692	1.02672	1.31612	1.02672	1.89913	1.02672
1.4232	1.02797	1.309	1.02797	1.89984	1.02797
1.43778	1.02922	1.30074	1.02922	1.90029	1.02922
1.45047	1.03047	1.2914	1.03047	1.9001	1.03047
1.46135	1.03172	1.28093	1.03172	1.89908	1.03172
1.47045	1.03297	1.26946	1.03297	1.8971	1.03297
1.47766	1.03422	1.25716	1.03422	1.89428	1.03422
1.48289	1.03547	1.24422	1.03547	1.89058	1.03547
1.48631	1.03672	1.23072	1.03672	1.88595	1.03672
1.48803	1.03797	1.21681	1.03797	1.88038	1.03797
1.48822	1.03922	1.20264	1.03922	1.87387	1.03922
1.48706	1.04047	1.1882	1.04047	1.86637	1.04047
1.48472	1.04172	1.17376	1.04172	1.85789	1.04172
1.48127	1.04297	1.15939	1.04297	1.84842	1.04297
1.4768	1.04422	1.14541	1.04422	1.83804	1.04422
1.47147	1.04547	1.13219	1.04547	1.8268	1.04547
1.46546	1.04672	1.11986	1.04672	1.81477	1.04672
1.45894	1.04797	1.10846	1.04797	1.80199	1.04797
1.45197	1.04922	1.09811	1.04922	1.78869	1.04922
1.44468	1.05047	1.08903	1.05047	1.77493	1.05047
1.4372	1.05172	1.08117	1.05172	1.7608	1.05172
1.42947	1.05297	1.07455	1.05297	1.74622	1.05297
1.42165	1.05422	1.06927	1.05422	1.73146	1.05422
1.41387	1.05547	1.06543	1.05547	1.71653	1.05547
1.40606	1.05672	1.06312	1.05672	1.70155	1.05672
1.39818	1.05797	1.06227	1.05797	1.68653	1.05797
1.39022	1.05922	1.06292	1.05922	1.67151	1.05922
1.38222	1.06047	1.06497	1.06047	1.65667	1.06047
1.37421	1.06172	1.06855	1.06172	1.64231	1.06172
1.36626	1.06297	1.07366	1.06297	1.62853	1.06297
1.35844	1.06422	1.08005	1.06422	1.61563	1.06422
1.35083	1.06547	1.08757	1.06547	1.60347	1.06547
1.34359	1.06672	1.09598	1.06672	1.59201	1.06672
1.33676	1.06797	1.10513	1.06797	1.58144	1.06797
1.33036	1.06922	1.115	1.06922	1.57182	1.06922
1.32446	1.07047	1.12542	1.07047	1.5634	1.07047
1.31913	1.07172	1.13641	1.07172	1.55623	1.07172
1.31424	1.07297	1.14792	1.07297	1.55044	1.07297
1.30984	1.07422	1.15979	1.07422	1.54612	1.07422
1.30591	1.07547	1.17191	1.07547	1.54309	1.07547
1.30245	1.07672	1.18409	1.07672	1.54133	1.07672
1.29945	1.07797	1.19613	1.07797	1.54083	1.07797
1.29673	1.07922	1.20771	1.07922	1.54133	1.07922
1.2939	1.08047	1.21881	1.08047	1.54255	1.08047
1.29079	1.08172	1.22916	1.08172	1.54454	1.08172
1.28736	1.08297	1.2387	1.08297	1.54734	1.08297
1.28357	1.08422	1.24743	1.08422	1.55071	1.08422
1.27946	1.08547	1.25538	1.08547	1.55458	1.08547
1.27499	1.08672	1.26254	1.08672	1.55892	1.08672
1.27008	1.08797	1.26883	1.08797	1.56342	1.08797
1.2648	1.08922	1.27423	1.08922	1.56799	1.08922
1.25913	1.09047	1.27871	1.09047	1.57244	1.09047
1.2531	1.09172	1.28235	1.09172	1.57668	1.09172
1.2468	1.09297	1.28515	1.09297	1.58045	1.09297
1.24039	1.09422	1.28722	1.09422	1.58381	1.09422
1.23389	1.09547	1.28864	1.09547	1.58669	1.09547
1.22729	1.09672	1.28956	1.09672	1.58911	1.09672
1.22066	1.09797	1.29	1.09797	1.59091	1.09797
1.21417	1.09922	1.29005	1.09922	1.59192	1.09922
1.20774	1.10047	1.28983	1.10047	1.592	1.10047
1.20134	1.10172	1.28954	1.10172	1.59103	1.10172
1.19507	1.10297	1.28928	1.10297	1.58898	1.10297
1.18887	1.10422	1.2893	1.10422	1.58586	1.10422
1.18283	1.10547	1.28962	1.10547	1.58172	1.10547
1.17694	1.10672	1.29037	1.10672	1.5766	1.10672
1.17123	1.10797	1.29155	1.10797	1.57062	1.10797
1.16571	1.10922	1.29303	1.10922	1.56384	1.10922
1.16038	1.11047	1.29476	1.11047	1.55628	1.11047
1.1552	1.11172	1.2969	1.11172	1.54814	1.11172
1.15019	1.11297	1.29953	1.11297	1.53946	1.11297
1.14532	1.11422	1.30255	1.11422	1.53036	1.11422
1.14055	1.11547	1.30596	1.11547	1.52088	1.11547
1.1359	1.11672	1.30977	1.11672	1.5113	1.11672
1.13129	1.11797	1.3139	1.11797	1.50168	1.11797
1.12669	1.11922	1.31828	1.11922	1.49221	1.11922
1.12212	1.12047	1.32273	1.12047	1.48301	1.12047
1.11775	1.12172	1.32717	1.12172	1.4743	1.12172
1.11352	1.12297	1.33158	1.12297	1.4663	1.12297
1.10946	1.12422	1.33588	1.12422	1.4591	1.12422
1.10553	1.12547	1.33987	1.12547	1.45264	1.12547
1.10179	1.12672	1.3434	1.12672	1.44693	1.12672
1.09824	1.12797	1.34644	1.12797	1.4418	1.12797
1.09473	1.12922	1.34889	1.12922	1.43736	1.12922
1.09112	1.13047	1.35079	1.13047	1.43371	1.13047
1.08734	1.13172	1.3522	1.13172	1.43081	1.13172
1.08327	1.13297	1.35297	1.13297	1.42872	1.13297
1.07886	1.13422	1.35314	1.13422	1.42744	1.13422
1.07394	1.13547	1.35256	1.13547	1.42686	1.13547
1.06849	1.13672	1.35121	1.13672	1.42679	1.13672
1.06245	1.13797	1.34902	1.13797	1.42706	1.13797
1.0558	1.13922	1.34588	1.13922	1.42763	1.13922
1.04854	1.14047	1.34181	1.14047	1.42847	1.14047
1.04049	1.14172	1.33684	1.14172	1.42935	1.14172
1.03156	1.14297	1.33108	1.14297	1.43029	1.14297
1.02198	1.14422	1.3245	1.14422	1.43131	1.14422
1.01188	1.14547	1.31738	1.14547	1.43226	1.14547
1.0013	1.14672	1.30981	1.14672	1.43301	1.14672
0.99022	1.14797	1.30179	1.14797	1.43341	1.14797
0.97861	1.14922	1.29333	1.14922	1.43331	1.14922
0.9665	1.15047	1.28447	1.15047	1.43256	1.15047
0.95395	1.15172	1.27534	1.15172	1.43121	1.15172
0.94106	1.15297	1.26599	1.15297	1.42903	1.15297
0.92802	1.15422	1.25652	1.15422	1.42601	1.15422
0.91491	1.15547	1.24704	1.15547	1.42203	1.15547
0.90181	1.15672	1.23768	1.15672	1.41713	1.15672
0.88877	1.15797	1.22852	1.15797	1.41113	1.15797
0.87584	1.15922	1.21973	1.15922	1.40401	1.15922
0.86314	1.16047	1.21138	1.16047	1.39564	1.16047
0.85073	1.16172	1.20358	1.16172	1.38592	1.16172
0.83871	1.16297	1.19637	1.16297	1.37498	1.16297
0.82717	1.16422	1.18983	1.16422	1.36309	1.16422
0.81638	1.16547	1.18396	1.16547	1.35042	1.16547
0.80634	1.16672	1.17885	1.16672	1.33706	1.16672
0.79719	1.16796	1.1744	1.16796	1.32311	1.16796
0.78893	1.16921	1.17059	1.16921	1.30872	1.16921
0.78174	1.17047	1.16739	1.17047	1.29409	1.17047
0.77563	1.17171	1.16476	1.17171	1.27937	1.17171
0.7707	1.17296	1.16271	1.17296	1.26485	1.17296
0.76693	1.17421	1.1613	1.17421	1.25083	1.17421
0.76437	1.17546	1.16027	1.17546	1.23734	1.17546
0.76305	1.17671	1.15939	1.17671	1.22457	1.17671
0.76301	1.17796	1.15851	1.17796	1.21264	1.17796
0.7643	1.17921	1.15757	1.17921	1.20185	1.17921
0.76697	1.18046	1.15641	1.18046	1.19226	1.18046
0.77104	1.18171	1.155	1.18171	1.18401	1.18171
0.77655	1.18296	1.15325	1.18296	1.17719	1.18296
0.78336	1.18421	1.15117	1.18421	1.1719	1.18421
0.79121	1.18546	1.14872	1.18546	1.16809	1.18546
0.80003	1.18671	1.14586	1.18671	1.16569	1.18671
0.80963	1.18796	1.14253	1.18796	1.16464	1.18796
0.81989	1.18921	1.1387	1.18921	1.16489	1.18921
0.83055	1.19046	1.13427	1.19046	1.16658	1.19046
0.84148	1.19171	1.12924	1.19171	1.16988	1.19171
0.85261	1.19296	1.12367	1.19296	1.1747	1.19296
0.86377	1.19421	1.11758	1.19421	1.18097	1.19421
0.87492	1.19546	1.11091	1.19546	1.18866	1.19546
0.88598	1.19671	1.10379	1.19671	1.19764	1.19671
0.89682	1.19796	1.0962	1.19796	1.20773	1.19796
0.90744	1.19921	1.08822	1.19921	1.21877	1.19921
0.91779	1.20046	1.07979	1.20046	1.2307	1.20046
0.92771	1.20171	1.07095	1.20171	1.24347	1.20171
0.93712	1.20296	1.06188	1.20296	1.25692	1.20296
0.94586	1.20421	1.05258	1.20421	1.27081	1.20421
0.95391	1.20546	1.04321	1.20546	1.28507	1.20546
0.96128	1.20671	1.03382	1.20671	1.29935	1.20671
0.96785	1.20796	1.02446	1.20796	1.31343	1.20796
0.97342	1.20921	1.0151	1.20921	1.32717	1.20921
0.97796	1.21046	1.00572	1.21046	1.34026	1.21046
0.98149	1.21171	0.99641	1.21171	1.3525	1.21171
0.98407	1.21296	0.9873	1.21296	1.36384	1.21296
0.98579	1.21421	0.97848	1.21421	1.3742	1.21421
0.98683	1.21546	0.97003	1.21546	1.38332	1.21546
0.98718	1.21671	0.96203	1.21671	1.39138	1.21671
0.98684	1.21796	0.9546	1.21796	1.39816	1.21796
0.98581	1.21921	0.94776	1.21921	1.40356	1.21921
0.98414	1.22046	0.9416	1.22046	1.40743	1.22046
0.98197	1.22171	0.93625	1.22171	1.40978	1.22171
0.97944	1.22296	0.93174	1.22296	1.41062	1.22296
0.9766	1.22421	0.92812	1.22421	1.41007	1.22421
0.97359	1.22546	0.92541	1.22546	1.40833	1.22546
0.97038	1.22671	0.92376	1.22671	1.4055	1.22671
0.96709	1.22796	0.92317	1.22796	1.40145	1.22796
0.96365	1.22921	0.92361	1.22921	1.39619	1.22921
0.96013	1.23046	0.92491	1.23046	1.38986	1.23046
0.95662	1.23171	0.92709	1.23171	1.38261	1.23171
0.95324	1.23296	0.93011	1.23296	1.3746	1.23296
0.94992	1.23421	0.93381	1.23421	1.36597	1.23421
0.94682	1.23546	0.93805	1.23546	1.35687	1.23546
0.94398	1.23671	0.94266	1.23671	1.34727	1.23671
0.9415	1.23796	0.9474	1.23796	1.3372	1.23796
0.9394	1.23921	0.95223	1.23921	1.32697	1.23921
0.93765	1.24046	0.9571	1.24046	1.31671	1.24046
0.93624	1.24171	0.96203	1.24171	1.30662	1.24171
0.93508	1.24296	0.96697	1.24296	1.29677	1.24296
0.93407	1.24421	0.97192	1.24421	1.28731	1.24421
0.93312	1.24546	0.9768	1.24546	1.27837	1.24546
0.93207	1.24671	0.98161	1.24671	1.27004	1.24671
0.93091	1.24796	0.9863	1.24796	1.26238	1.24796
0.9296	1.24921	0.99076	1.24921	1.25561	1.24921
0.92812	1.25046	0.9949	1.25046	1.24984	1.25046
0.92664	1.25171	0.99868	1.25171	1.2452	1.25171
0.9251	1.25296	1.00206	1.25296	1.24187	1.25296
0.92364	1.25421	1.00513	1.25421	1.23978	1.25421
0.92217	1.25546	1.00788	1.25546	1.23873	1.25546
0.92078	1.25671	1.01026	1.25671	1.23879	1.25671
0.91947	1.25796	1.01223	1.25796	1.23991	1.25796
0.91808	1.25921	1.01375	1.25921	1.24197	1.25921
0.91658	1.26046	1.01473	1.26046	1.24493	1.26046
0.91498	1.26171	1.01513	1.26171	1.24864	1.26171
0.9132	1.26296	1.01491	1.26296	1.25306	1.26296
0.91124	1.26421	1.01411	1.26421	1.25798	1.26421
0.90915	1.26546	1.01275	1.26546	1.26324	1.26546
0.9069	1.26671	1.0107	1.26671	1.26873	1.26671
0.90459	1.26796	1.00801	1.26796	1.27424	1.26796
0.9022	1.26921	1.00452	1.26921	1.27961	1.26921
0.8996	1.27046	1.00018	1.27046	1.2849	1.27046
0.89686	1.27171	0.99501	1.27171	1.28997	1.27171
0.89414	1.27296	0.98903	1.27296	1.2946	1.27296
0.89148	1.27421	0.98225	1.27421	1.29883	1.27421
0.88888	1.27546	0.97472	1.27546	1.30279	1.27546
0.88637	1.27671	0.96642	1.27671	1.30627	1.27671
0.88388	1.27796	0.95734	1.27796	1.30918	1.27796
0.88124	1.27921	0.94757	1.27921	1.31152	1.27921
0.87855	1.28046	0.93719	1.28046	1.31288	1.28046
0.87579	1.28171	0.92629	1.28171	1.31314	1.28171
0.87303	1.28296	0.9151	1.28296	1.31233	1.28296
0.87031	1.28421	0.90368	1.28421	1.31043	1.28421
0.86752	1.28546	0.89205	1.28546	1.30742	1.28546
0.86459	1.28671	0.88029	1.28671	1.30325	1.28671
0.86152	1.28796	0.86845	1.28796	1.29791	1.28796
0.85819	1.28921	0.85665	1.28921	1.29135	1.28921
0.85465	1.29046	0.84484	1.29046	1.28353	1.29046
0.85097	1.29171	0.833	1.29171	1.27467	1.29171
0.8472	1.29296	0.82122	1.29296	1.26495	1.29296
0.84342	1.29421	0.80959	1.29421	1.2544	1.29421
0.83958	1.29546	0.79803	1.29546	1.24316	1.29546
0.83569	1.29671	0.78653	1.29671	1.23138	1.29671
0.83192	1.29796	0.77518	1.29796	1.21914	1.29796
0.82812	1.29921	0.76412	1.29921	1.20653	1.29921
0.82424	1.30046	0.7535	1.30046	1.19388	1.30046
0.82017	1.30171	0.74347	1.30171	1.18147	1.30171
0.81588	1.30296	0.73417	1.30296	1.16931	1.30296
0.81136	1.30421	0.72576	1.30421	1.15757	1.30421
0.80661	1.30546	0.71837	1.30546	1.14641	1.30546
0.80174	1.30671	0.71209	1.30671	1.13598	1.30671
0.79684	1.30796	0.70698	1.30796	1.12638	1.30796
0.79204	1.30921	0.70316	1.30921	1.11772	1.30921
0.78741	1.31046	0.7006	1.31046	1.11006	1.31046
0.78301	1.31171	0.6993	1.31171	1.10351	1.31171
0.77904	1.31296	0.69939	1.31296	1.09802	1.31296
0.77565	1.31421	0.70086	1.31421	1.09367	1.31421
0.77269	1.31546	0.7037	1.31546	1.09055	1.31546
0.77021	1.31671	0.70792	1.31671	1.08864	1.31671
0.76814	1.31796	0.71339	1.31796	1.08792	1.31796
0.76654	1.31921	0.72008	1.31921	1.08851	1.31921
0.76528	1.32046	0.72785	1.32046	1.09036	1.32046
0.76436	1.32171	0.73662	1.32171	1.09345	1.32171
0.76397	1.32296	0.74628	1.32296	1.0978	1.32296
0.76421	1.32421	0.75671	1.32421	1.10324	1.32421
0.76516	1.32546	0.76783	1.32546	1.10978	1.32546
0.76685	1.32671	0.77947	1.32671	1.11732	1.32671
0.76916	1.32796	0.79147	1.32796	1.12577	1.32796
0.77204	1.32921	0.80363	1.32921	1.13502	1.32921
0.77546	1.33046	0.81593	1.33046	1.14487	1.33046
0.77922	1.33171	0.82818	1.33171	1.15532	1.33171
0.78329	1.33296	0.84034	1.33296	1.16623	1.33296
0.78781	1.33421	0.85224	1.33421	1.17742	1.33421
0.79273	1.33546	0.86372	1.33546	1.18869	1.33546
0.79791	1.33671	0.8747	1.33671	1.19999	1.33671
0.80321	1.33796	0.88514	1.33796	1.21109	1.33796
0.80861	1.33921	0.89492	1.33921	1.22163	1.33921
0.81398	1.34046	0.90405	1.34046	1.2315	1.34046
0.81932	1.34171	0.91253	1.34171	1.24046	1.34171
0.82465	1.34296	0.92032	1.34296	1.24829	1.34296
0.82985	1.34421	0.92745	1.34421	1.25506	1.34421
0.83491	1.34546	0.93386	1.34546	1.26085	1.34546
0.83975	1.34671	0.93939	1.34671	1.26553	1.34671
0.84421	1.34796	0.944	1.34796	1.26906	1.34796
0.84824	1.34921	0.94781	1.34921	1.27148	1.34921
0.85178	1.35046	0.95071	1.35046	1.27295	1.35046
0.85479	1.35171	0.95274	1.35171	1.27351	1.35171
0.85729	1.35296	0.95386	1.35296	1.27331	1.35296
0.8593	1.35421	0.95405	1.35421	1.27235	1.35421
0.86071	1.35546	0.95337	1.35546	1.27057	1.35546
0.86144	1.35671	0.95184	1.35671	1.26783	1.35671
0.86148	1.35796	0.9495	1.35796	1.26422	1.35796
0.86084	1.35921	0.94663	1.35921	1.25977	1.35921
0.85941	1.36046	0.94339	1.36046	1.25447	1.36046
0.857	1.36171	0.93997	1.36171	1.24834	1.36171
0.85367	1.36296	0.93639	1.36296	1.24155	1.36296
0.84947	1.36421	0.93273	1.36421	1.23402	1.36421
0.84447	1.36546	0.92909	1.36546	1.22571	1.36546
0.83879	1.36671	0.92554	1.36671	1.21677	1.36671
0.83259	1.36796	0.92216	1.36796	1.20723	1.36796
0.82591	1.36921	0.91892	1.36921	1.19703	1.36921
0.81877	1.37046	0.91581	1.37046	1.1862	1.37046
0.81116	1.37171	0.91286	1.37171	1.17487	1.37171
0.80305	1.37296	0.91004	1.37296	1.16306	1.37296
0.79454	1.37421	0.90738	1.37421	1.15093	1.37421
0.78569	1.37546	0.90493	1.37546	1.1386	1.37546
0.77647	1.37671	0.90256	1.37671	1.12618	1.37671
0.76671	1.37796	0.90028	1.37796	1.11379	1.37796
0.75657	1.37921	0.89807	1.37921	1.10138	1.37921
0.74615	1.38046	0.89582	1.38046	1.08896	1.38046
0.73564	1.38171	0.89359	1.38171	1.07659	1.38171
0.72508	1.38296	0.89129	1.38296	1.06433	1.38296
0.7147	1.38421	0.88893	1.38421	1.05213	1.38421
0.70463	1.38546	0.88649	1.38546	1.03999	1.38546
0.69482	1.38671	0.88393	1.38671	1.02781	1.38671
0.68529	1.38796	0.8813	1.38796	1.01569	1.38796
0.67599	1.38921	0.87857	1.38921	1.00349	1.38921
0.66692	1.39046	0.87575	1.39046	0.9911	1.39046
0.65822	1.39171	0.87285	1.39171	0.9785	1.39171
0.64994	1.39296	0.86988	1.39296	0.96564	1.39296
0.64214	1.39421	0.86679	1.39421	0.95255	1.39421
0.63509	1.39546	0.86349	1.39546	0.93919	1.39546
0.62887	1.39671	0.85991	1.39671	0.92555	1.39671
0.62339	1.39796	0.85607	1.39796	0.91163	1.39796
0.61862	1.39921	0.85203	1.39921	0.89756	1.39921
0.61461	1.40046	0.84771	1.40046	0.88333	1.40046
0.61144	1.40171	0.84309	1.40171	0.869	1.40171
0.60911	1.40296	0.83822	1.40296	0.85471	1.40296
0.60765	1.40421	0.83314	1.40421	0.84058	1.40421
0.60703	1.40546	0.82778	1.40546	0.82679	1.40546
0.60722	1.40671	0.82217	1.40671	0.81355	1.40671
0.60827	1.40796	0.81618	1.40796	0.80099	1.40796
0.61	1.40921	0.8098	1.40921	0.78906	1.40921
0.6123	1.41046	0.80304	1.41046	0.77792	1.41046
0.61516	1.41171	0.79591	1.41171	0.76772	1.41171
0.61847	1.41296	0.78826	1.41296	0.75854	1.41296
0.6222	1.41421	0.78017	1.41421	0.75028	1.41421
0.62622	1.41546	0.77163	1.41546	0.74293	1.41546
0.63056	1.41671	0.76269	1.41671	0.7363	1.41671
0.63506	1.41796	0.75349	1.41796	0.73038	1.41796
0.63966	1.41921	0.74414	1.41921	0.72519	1.41921
0.64429	1.42046	0.73469	1.42046	0.72092	1.42046
0.64874	1.42171	0.72521	1.42171	0.71759	1.42171
0.6529	1.42296	0.71566	1.42296	0.71517	1.42296
0.65674	1.42421	0.70601	1.42421	0.71366	1.42421
0.66024	1.42546	0.69611	1.42546	0.71324	1.42546
0.66332	1.42671	0.68607	1.42671	0.71381	1.42671
0.66587	1.42796	0.6759	1.42796	0.71537	1.42796
0.66782	1.42921	0.66556	1.42921	0.7179	1.42921
0.66899	1.43046	0.6551	1.43046	0.72132	1.43046
0.66921	1.43171	0.64442	1.43171	0.72556	1.43171
0.66847	1.43296	0.63365	1.43296	0.73065	1.43296
0.66669	1.43421	0.62286	1.43421	0.73664	1.43421
0.66389	1.43546	0.61205	1.43546	0.7434	1.43546
0.66011	1.43671	0.60123	1.43671	0.75088	1.43671
0.65532	1.43796	0.59051	1.43796	0.75901	1.43796
0.64959	1.43921	0.57998	1.43921	0.76768	1.43921
0.64295	1.44046	0.56972	1.44046	0.77681	1.44046
0.63571	1.44171	0.5598	1.44171	0.78627	1.44171
0.62792	1.44296	0.55033	1.44296	0.79605	1.44296
0.61967	1.44421	0.54149	1.44421	0.80607	1.44421
0.61091	1.44546	0.53328	1.44546	0.81627	1.44546
0.60179	1.44671	0.52581	1.44671	0.82648	1.44671
0.59224	1.44796	0.51917	1.44796	0.83659	1.44796
0.58237	1.44921	0.51342	1.44921	0.84647	1.44921
0.57232	1.45046	0.50875	1.45046	0.85601	1.45046
0.56223	1.45171	0.50512	1.45171	0.86504	1.45171
0.55223	1.45296	0.50254	1.45296	0.87345	1.45296
0.54247	1.45421	0.50102	1.45421	0.88126	1.45421
0.53303	1.45546	0.50056	1.45546	0.88844	1.45546
0.52408	1.45671	0.50112	1.45671	0.89497	1.45671
0.51569	1.45796	0.50264	1.45796	0.90086	1.45796
0.50783	1.45921	0.50514	1.45921	0.90603	1.45921
0.50061	1.46046	0.50854	1.46046	0.91054	1.46046
0.49413	1.46171	0.51282	1.46171	0.91432	1.46171
0.48865	1.46296	0.51785	1.46296	0.9173	1.46296
0.48422	1.46421	0.52364	1.46421	0.91945	1.46421
0.48095	1.46546	0.53011	1.46546	0.92085	1.46546
0.47885	1.46671	0.53715	1.46671	0.92154	1.46671
0.47795	1.46796	0.54456	1.46796	0.92148	1.46796
0.47827	1.46921	0.55229	1.46921	0.92063	1.46921
0.4798	1.47046	0.56021	1.47046	0.91891	1.47046
0.48242	1.47171	0.56821	1.47171	0.91622	1.47171
0.48619	1.47296	0.57618	1.47296	0.9127	1.47296
0.49103	1.47421	0.58407	1.47421	0.90839	1.47421
0.4969	1.47546	0.59179	1.47546	0.90327	1.47546
0.50385	1.47671	0.59928	1.47671	0.89734	1.47671
0.51184	1.47796	0.60654	1.47796	0.89066	1.47796
0.52088	1.47921	0.61355	1.47921	0.88324	1.47921
0.53065	1.48046	0.6202	1.48046	0.87523	1.48046
0.54103	1.48171	0.62631	1.48171	0.8668	1.48171
0.55189	1.48296	0.6317	1.48296	0.85802	1.48296
0.56307	1.48421	0.63629	1.48421	0.84883	1.48421
0.57448	1.48546	0.64	1.48546	0.83925	1.48546
0.58598	1.48671	0.64274	1.48671	0.82945	1.48671
0.59743	1.48796	0.64452	1.48796	0.81956	1.48796
0.60871	1.48921	0.64539	1.48921	0.80941	1.48921
0.61969	1.49046	0.64533	1.49046	0.79904	1.49046
0.63026	1.49171	0.64434	1.49171	0.78845	1.49171
0.64041	1.49296	0.6425	1.49296	0.77772	1.49296
0.65011	1.49421	0.63988	1.49421	0.76701	1.49421
0.65928	1.49546	0.63658	1.49546	0.75647	1.49546
0.66782	1.49671	0.63261	1.49671	0.74613	1.49671
0.67571	1.49796	0.62807	1.49796	0.73603	1.49796
0.68284	1.49921	0.62314	1.49921	0.72634	1.49921
0.68916	1.50046	0.61802	1.50046	0.71719	1.50046
0.69457	1.50171	0.61279	1.50171	0.70868	1.50171
0.69901	1.50296	0.60751	1.50296	0.70095	1.50296
0.7024	1.50421	0.6023	1.50421	0.69406	1.50421
0.70457	1.50545	0.59724	1.50545	0.68813	1.50545
0.7055	1.5067	0.59235	1.5067	0.68317	1.5067
0.70512	1.50795	0.58768	1.50795	0.67926	1.50795
0.70347	1.5092	0.58333	1.5092	0.67636	1.5092
0.70055	1.51045	0.57935	1.51045	0.67451	1.51045
0.69644	1.5117	0.57577	1.5117	0.67384	1.5117
0.69122	1.51295	0.57264	1.51295	0.67437	1.51295
0.68489	1.5142	0.56988	1.5142	0.67603	1.5142
0.67748	1.51545	0.56749	1.51545	0.67884	1.51545
0.66906	1.5167	0.56557	1.5167	0.68291	1.5167
0.65969	1.51795	0.56411	1.51795	0.68817	1.51795
0.64952	1.5192	0.56307	1.5192	0.69449	1.5192
0.63866	1.52045	0.56248	1.52045	0.70181	1.52045
0.62735	1.5217	0.56234	1.5217	0.70993	1.5217
0.61581	1.52295	0.5626	1.52295	0.71884	1.52295
0.60416	1.5242	0.56342	1.5242	0.72835	1.5242
0.59254	1.52545	0.56472	1.52545	0.73834	1.52545
0.58096	1.5267	0.56655	1.5267	0.74875	1.5267
0.56953	1.52795	0.56886	1.52795	0.75958	1.52795
0.55826	1.5292	0.57167	1.5292	0.77063	1.5292
0.54719	1.53045	0.57494	1.53045	0.78169	1.53045
0.53644	1.5317	0.57872	1.5317	0.79271	1.5317
0.52608	1.53295	0.58289	1.53295	0.80361	1.53295
0.51623	1.5342	0.58738	1.5342	0.81434	1.5342
0.50695	1.53545	0.59225	1.53545	0.8249	1.53545
0.49831	1.5367	0.5975	1.5367	0.8351	1.5367
0.49046	1.53795	0.60304	1.53795	0.84472	1.53795
0.48344	1.5392	0.60882	1.5392	0.85367	1.5392
0.47717	1.54045	0.61486	1.54045	0.86182	1.54045
0.4716	1.5417	0.62108	1.5417	0.86909	1.5417
0.46668	1.54295	0.62728	1.54295	0.87532	1.54295
0.46255	1.5442	0.63343	1.5442	0.88044	1.5442
0.45923	1.54545	0.6395	1.54545	0.8843	1.54545
0.45675	1.5467	0.64557	1.5467	0.88687	1.5467
0.45508	1.54795	0.65165	1.54795	0.8882	1.54795
0.45426	1.5492	0.65768	1.5492	0.88827	1.5492
0.45433	1.55045	0.66372	1.55045	0.88698	1.55045
0.45524	1.5517	0.66971	1.5517	0.88426	1.5517
0.457	1.55295	0.67566	1.55295	0.88021	1.55295
0.45952	1.5542	0.68155	1.5542	0.87494	1.5542
0.46273	1.55545	0.68737	1.55545	0.86868	1.55545
0.46644	1.5567	0.69311	1.5567	0.86152	1.5567
0.47047	1.55795	0.69866	1.55795	0.85348	1.55795
0.47474	1.5592	0.704	1.5592	0.84475	1.5592
0.47911	1.56045	0.70916	1.56045	0.83555	1.56045
0.48341	1.5617	0.71405	1.5617	0.82613	1.5617
0.48758	1.56295	0.71858	1.56295	0.81668	1.56295
0.49151	1.5642	0.72256	1.5642	0.80735	1.5642
0.49527	1.56545	0.72587	1.56545	0.79833	1.56545
0.49882	1.5667	0.72843	1.5667	0.78974	1.5667
0.50224	1.56795	0.73012	1.56795	0.78178	1.56795
0.5055	1.5692	0.73089	1.5692	0.77465	1.5692
0.50853	1.57045	0.73074	1.57045	0.76851	1.57045
0.51141	1.5717	0.72962	1.5717	0.76349	1.5717
0.51412	1.57295	0.72747	1.57295	0.75978	1.57295
0.51664	1.5742	0.72437	1.5742	0.75753	1.5742
0.51903	1.57545	0.72029	1.57545	0.75659	1.57545
0.52128	1.5767	0.71525	1.5767	0.75695	1.5767
0.52342	1.57795	0.70933	1.57795	0.75882	1.57795
0.52552	1.5792	0.70272	1.5792	0.76211	1.5792
0.52761	1.58045	0.69542	1.58045	0.76667	1.58045
0.52981	1.5817	0.68746	1.5817	0.7724	1.5817
0.53215	1.58295	0.67897	1.58295	0.77916	1.58295
0.53473	1.5842	0.67005	1.5842	0.78683	1.5842
0.53743	1.58545	0.6608	1.58545	0.7954	1.58545
0.5402	1.5867	0.65133	1.5867	0.80468	1.5867
0.54304	1.58795	0.64163	1.58795	0.81462	1.58795
0.54595	1.5892	0.63178	1.5892	0.82524	1.5892
0.54889	1.59045	0.62184	1.59045	0.83633	1.59045
0.55183	1.5917	0.61187	1.5917	0.84771	1.5917
0.55481	1.59295	0.60191	1.59295	0.8592	1.59295
0.55799	1.5942	0.59209	1.5942	0.87068	1.5942
0.56132	1.59545	0.58244	1.59545	0.88186	1.59545
0.56476	1.5967	0.57314	1.5967	0.8925	1.5967
0.56827	1.59795	0.56429	1.59795	0.90238	1.59795
0.57186	1.5992	0.55592	1.5992	0.91123	1.5992
0.57545	1.60045	0.54809	1.60045	0.91888	1.60045
0.57895	1.6017	0.54087	1.6017	0.92536	1.6017
0.58234	1.60295	0.53433	1.60295	0.93053	1.60295
0.58562	1.6042	0.52847	1.6042	0.93424	1.6042
0.58881	1.60545	0.52327	1.60545	0.93637	1.60545
0.59193	1.6067	0.51886	1.6067	0.93695	1.6067
0.59488	1.60795	0.51524	1.60795	0.93594	1.60795
0.5976	1.6092	0.51248	1.6092	0.93334	1.6092
0.60003	1.61045	0.51047	1.61045	0.9291	1.61045
0.60219	1.6117	0.50922	1.6117	0.92326	1.6117
0.60398	1.61295	0.50871	1.61295	0.91591	1.61295
0.60522	1.6142	0.50882	1.6142	0.90716	1.6142
0.6059	1.61545	0.50948	1.61545	0.89713	1.61545
0.6059	1.6167	0.51059	1.6167	0.88604	1.6167
0.60519	1.61795	0.51203	1.61795	0.87406	1.61795
0.60375	1.6192	0.51369	1.6192	0.86129	1.6192
0.60159	1.62045	0.51544	1.62045	0.84806	1.62045
0.59872	1.6217	0.51723	1.6217	0.83471	1.6217
0.59521	1.62295	0.51902	1.62295	0.82142	1.62295
0.59115	1.6242	0.52063	1.6242	0.8084	1.6242
0.58671	1.62545	0.52199	1.62545	0.79589	1.62545
0.58198	1.6267	0.52303	1.6267	0.78406	1.6267
0.57708	1.62795	0.52376	1.62795	0.77317	1.62795
0.57194	1.6292	0.52421	1.6292	0.76345	1.6292
0.56662	1.63045	0.52436	1.63045	0.75518	1.63045
0.56103	1.6317	0.52421	1.6317	0.74851	1.6317
0.55526	1.63295	0.52376	1.63295	0.74345	1.63295
0.54942	1.6342	0.52301	1.6342	0.74013	1.6342
0.54347	1.63545	0.52201	1.63545	0.73862	1.63545
0.53745	1.6367	0.52081	1.6367	0.73882	1.6367
0.53151	1.63795	0.51938	1.63795	0.74062	1.63795
0.52561	1.6392	0.51777	1.6392	0.74412	1.6392
0.51974	1.64045	0.5161	1.64045	0.7493	1.64045
0.51392	1.6417	0.51434	1.6417	0.75589	1.6417
0.50827	1.64295	0.51244	1.64295	0.76378	1.64295
0.5028	1.6442	0.51043	1.6442	0.77285	1.6442
0.49749	1.64545	0.50841	1.64545	0.78305	1.64545
0.49233	1.6467	0.5064	1.6467	0.79438	1.6467
0.48719	1.64795	0.50439	1.64795	0.80677	1.64795
0.4821	1.6492	0.50238	1.6492	0.82008	1.6492
0.47711	1.65045	0.50039	1.65045	0.83426	1.65045
0.47213	1.6517	0.49844	1.6517	0.849	1.6517
0.46714	1.65295	0.4966	1.65295	0.86396	1.65295
0.46218	1.6542	0.49495	1.6542	0.8789	1.6542
0.45729	1.65545	0.4936	1.65545	0.89353	1.65545
0.45248	1.6567	0.4926	1.6567	0.90762	1.6567
0.44756	1.65795	0.49194	1.65795	0.92099	1.65795
0.44252	1.6592	0.49169	1.6592	0.93356	1.6592
0.43738	1.66045	0.49182	1.66045	0.94523	1.66045
0.43213	1.6617	0.49239	1.6617	0.95579	1.6617
0.42673	1.66295	0.49334	1.66295	0.96524	1.66295
0.42127	1.6642	0.49466	1.6642	0.97351	1.6642
0.41578	1.66545	0.49635	1.66545	0.98034	1.66545
0.41029	1.6667	0.49837	1.6667	0.98558	1.6667
0.40484	1.66795	0.50065	1.66795	0.98923	1.66795
0.39942	1.6692	0.50315	1.6692	0.99119	1.6692
0.39402	1.67045	0.50579	1.67045	0.99141	1.67045
0.38866	1.6717	0.50857	1.6717	0.98993	1.6717
0.38335	1.67295	0.51134	1.67295	0.9868	1.67295
0.37813	1.6742	0.51408	1.6742	0.9821	1.6742
0.37299	1.67545	0.51662	1.67545	0.97579	1.67545
0.36798	1.6767	0.51886	1.6767	0.96795	1.6767
0.36327	1.67795	0.52082	1.67795	0.9587	1.67795
0.35887	1.6792	0.52244	1.6792	0.94821	1.6792
0.35487	1.68045	0.52372	1.68045	0.93666	1.68045
0.35126	1.6817	0.52465	1.6817	0.92421	1.6817
0.34813	1.68295	0.5252	1.68295	0.91113	1.68295
0.34552	1.6842	0.5254	1.6842	0.89747	1.6842
0.34355	1.68545	0.52524	1.68545	0.88338	1.68545
0.34224	1.6867	0.52462	1.6867	0.86912	1.6867
0.34157	1.68795	0.52358	1.68795	0.85487	1.68795
0.34147	1.6892	0.52213	1.6892	0.84084	1.6892
0.34187	1.69045	0.52033	1.69045	0.8272	1.69045
0.34276	1.6917	0.51812	1.6917	0.81405	1.6917
0.34419	1.69295	0.51545	1.69295	0.80149	1.69295
0.3461	1.6942	0.51232	1.6942	0.78949	1.6942
0.34854	1.69545	0.50876	1.69545	0.77819	1.69545
0.35143	1.6967	0.50483	1.6967	0.76768	1.6967
0.3547	1.69795	0.50056	1.69795	0.75799	1.69795
0.35838	1.6992	0.4959	1.6992	0.74908	1.6992
0.36247	1.70045	0.49092	1.70045	0.74113	1.70045
0.3668	1.7017	0.4857	1.7017	0.73418	1.7017
0.3713	1.70295	0.48028	1.70295	0.72826	1.70295
0.37594	1.7042	0.47463	1.7042	0.72336	1.7042
0.38075	1.70545	0.46888	1.70545	0.71964	1.70545
0.38552	1.7067	0.46309	1.7067	0.71719	1.7067
0.39017	1.70795	0.45729	1.70795	0.71603	1.70795
0.39459	1.7092	0.45147	1.7092	0.7161	1.7092
0.39871	1.71045	0.44568	1.71045	0.7173	1.71045
0.40254	1.7117	0.43995	1.7117	0.71944	1.7117
0.40599	1.71295	0.43438	1.71295	0.72236	1.71295
0.40898	1.7142	0.42901	1.7142	0.72581	1.7142
0.41153	1.71545	0.42398	1.71545	0.72974	1.71545
0.41369	1.7167	0.4193	1.7167	0.7341	1.7167
0.41539	1.71795	0.415	1.71795	0.73884	1.71795
0.41662	1.7192	0.41108	1.7192	0.74393	1.7192
0.41731	1.72045	0.40757	1.72045	0.7493	1.72045
0.4175	1.7217	0.40451	1.7217	0.75483	1.7217
0.41722	1.72295	0.40186	1.72295	0.76034	1.72295
0.41655	1.7242	0.39964	1.7242	0.76569	1.7242
0.4155	1.72545	0.39781	1.72545	0.77085	1.72545
0.41414	1.7267	0.39645	1.7267	0.77559	1.7267
0.41244	1.72795	0.39551	1.72795	0.77979	1.72795
0.41048	1.7292	0.39494	1.7292	0.78337	1.7292
0.40822	1.73045	0.39468	1.73045	0.78627	1.73045
0.40565	1.7317	0.39474	1.7317	0.78834	1.7317
0.40283	1.73295	0.39511	1.73295	0.78964	1.73295
0.39977	1.7342	0.39575	1.7342	0.7901	1.7342
0.39652	1.73545	0.39654	1.73545	0.78959	1.73545
0.39314	1.7367	0.39747	1.7367	0.78797	1.7367
0.38972	1.73795	0.39846	1.73795	0.78522	1.73795
0.38631	1.7392	0.39949	1.7392	0.78143	1.7392
0.383	1.74045	0.40055	1.74045	0.77656	1.74045
0.37973	1.7417	0.40161	1.7417	0.77065	1.7417
0.37655	1.74295	0.4026	1.74295	0.76371	1.74295
0.37347	1.7442	0.40343	1.7442	0.75577	1.7442
0.37062	1.74545	0.40403	1.74545	0.74687	1.74545
0.36798	1.7467	0.40439	1.7467	0.73698	1.7467
0.36563	1.74795	0.4044	1.74795	0.72626	1.74795
0.36349	1.7492	0.40402	1.7492	0.71484	1.7492
0.36158	1.75045	0.40325	1.75045	0.7028	1.75045
0.35992	1.7517	0.40208	1.7517	0.69019	1.7517
0.35856	1.75295	0.40046	1.75295	0.67703	1.75295
0.35755	1.7542	0.39831	1.7542	0.66342	1.7542
0.35686	1.75545	0.39567	1.75545	0.64948	1.75545
0.35644	1.7567	0.39253	1.7567	0.63533	1.7567
0.35637	1.75795	0.38893	1.75795	0.62115	1.75795
0.3566	1.7592	0.3849	1.7592	0.60701	1.7592
0.35711	1.76045	0.38048	1.76045	0.59305	1.76045
0.3579	1.7617	0.37568	1.7617	0.57952	1.7617
0.35892	1.76295	0.37061	1.76295	0.56664	1.76295
0.36011	1.7642	0.36529	1.7642	0.55444	1.7642
0.36145	1.76545	0.35976	1.76545	0.54308	1.76545
0.363	1.7667	0.35405	1.7667	0.53264	1.7667
0.36472	1.76795	0.34819	1.76795	0.52319	1.76795
0.36646	1.7692	0.34215	1.7692	0.51468	1.7692
0.36824	1.77045	0.33599	1.77045	0.50704	1.77045
0.37009	1.7717	0.32976	1.7717	0.50028	1.7717
0.37197	1.77295	0.32357	1.77295	0.49442	1.77295
0.37387	1.7742	0.31748	1.7742	0.48941	1.7742
0.37574	1.77545	0.31156	1.77545	0.48531	1.77545
0.37759	1.7767	0.30592	1.7767	0.48216	1.7767
0.37947	1.77795	0.30063	1.77795	0.48004	1.77795
0.3813	1.7792	0.29572	1.7792	0.47902	1.7792
0.383	1.78045	0.29127	1.78045	0.47905	1.78045
0.38451	1.7817	0.28739	1.7817	0.48008	1.7817
0.38578	1.78295	0.2841	1.78295	0.48214	1.78295
0.38682	1.7842	0.28146	1.7842	0.48522	1.7842
0.38763	1.78545	0.27956	1.78545	0.48925	1.78545
0.38822	1.7867	0.27852	1.7867	0.49425	1.7867
0.38847	1.78795	0.27836	1.78795	0.50016	1.78795
0.3884	1.7892	0.27909	1.7892	0.50686	1.7892
0.38797	1.79045	0.28059	1.79045	0.51431	1.79045
0.38725	1.7917	0.28293	1.7917	0.52243	1.7917
0.38615	1.79295	0.28608	1.79295	0.53105	1.79295
0.38477	1.7942	0.29005	1.7942	0.5401	1.7942
0.3831	1.79545	0.29476	1.79545	0.54949	1.79545
0.38109	1.7967	0.30008	1.7967	0.55899	1.7967
0.37882	1.79795	0.30591	1.79795	0.5684	1.79795
0.37637	1.7992	0.31218	1.7992	0.57763	1.7992
0.37372	1.80045	0.31883	1.80045	0.58662	1.80045
0.37086	1.8017	0.32582	1.8017	0.59524	1.8017
0.36779	1.80295	0.33311	1.80295	0.60331	1.80295
0.36449	1.8042	0.34067	1.8042	0.61078	1.8042
0.36102	1.80545	0.34832	1.80545	0.61754	1.80545
0.35743	1.8067	0.35602	1.8067	0.62356	1.8067
0.35382	1.80795	0.36372	1.80795	0.62883	1.80795
0.35021	1.8092	0.37137	1.8092	0.63329	1.8092
0.34661	1.81045	0.37888	1.81045	0.63708	1.81045
0.34301	1.8117	0.38621	1.8117	0.64014	1.8117
0.33951	1.81295	0.39329	1.81295	0.64245	1.81295
0.33614	1.8142	0.40005	1.8142	0.64402	1.8142
0.33294	1.81545	0.4064	1.81545	0.64489	1.81545
0.32991	1.8167	0.41232	1.8167	0.64514	1.8167
0.32707	1.81795	0.41783	1.81795	0.64488	1.81795
0.32447	1.8192	0.42285	1.8192	0.64417	1.8192
0.32213	1.82045	0.42747	1.82045	0.6431	1.82045
0.31999	1.8217	0.43169	1.8217	0.64175	1.8217
0.3181	1.82295	0.43547	1.82295	0.64028	1.82295
0.31653	1.8242	0.43873	1.8242	0.63869	1.8242
0.31533	1.82545	0.44144	1.82545	0.63685	1.82545
0.31441	1.8267	0.44355	1.8267	0.63471	1.8267
0.31381	1.82795	0.44503	1.82795	0.63226	1.82795
0.31353	1.8292	0.44589	1.8292	0.62944	1.8292
0.31346	1.83045	0.44615	1.83045	0.62624	1.83045
0.31369	1.8317	0.44587	1.8317	0.62267	1.8317
0.31425	1.83295	0.44515	1.83295	0.61888	1.83295
0.31511	1.8342	0.44401	1.8342	0.61492	1.8342
0.31616	1.83544	0.44253	1.83544	0.61084	1.83544
0.31734	1.83669	0.44072	1.83669	0.60669	1.83669
0.31866	1.83794	0.43864	1.83794	0.60264	1.83794
0.32005	1.83919	0.43641	1.83919	0.59873	1.83919
0.32144	1.84044	0.43404	1.84044	0.59508	1.84044
0.32272	1.84169	0.43156	1.84169	0.59186	1.84169
0.32388	1.84294	0.42901	1.84294	0.58903	1.84294
0.32489	1.84419	0.42646	1.84419	0.58675	1.84419
0.32573	1.84544	0.42389	1.84544	0.58516	1.84544
0.3264	1.84669	0.4214	1.84669	0.58418	1.84669
0.32692	1.84794	0.41899	1.84794	0.58381	1.84794
0.32724	1.84919	0.41665	1.84919	0.58404	1.84919
0.32735	1.85044	0.41433	1.85044	0.58472	1.85044
0.32732	1.85169	0.41203	1.85169	0.58579	1.85169
0.32714	1.85294	0.40973	1.85294	0.58714	1.85294
0.32684	1.85419	0.40748	1.85419	0.58873	1.85419
0.32633	1.85544	0.4052	1.85544	0.59038	1.85544
0.32564	1.85669	0.40288	1.85669	0.59206	1.85669
0.32472	1.85794	0.4004	1.85794	0.59363	1.85794
0.32357	1.85919	0.39775	1.85919	0.59492	1.85919
0.32233	1.86044	0.39499	1.86044	0.59585	1.86044
0.32095	1.86169	0.39213	1.86169	0.5964	1.86169
0.3194	1.86294	0.38928	1.86294	0.5965	1.86294
0.31777	1.86419	0.38641	1.86419	0.59603	1.86419
0.31611	1.86544	0.38354	1.86544	0.59493	1.86544
0.3146	1.86669	0.38062	1.86669	0.59325	1.86669
0.31326	1.86794	0.37764	1.86794	0.59098	1.86794
0.31216	1.86919	0.37467	1.86919	0.58821	1.86919
0.31133	1.87044	0.37171	1.87044	0.58489	1.87044
0.31074	1.87169	0.36874	1.87169	0.58104	1.87169
0.31034	1.87294	0.36572	1.87294	0.5767	1.87294
0.31017	1.87419	0.36267	1.87419	0.57182	1.87419
0.31027	1.87544	0.35956	1.87544	0.5665	1.87544
0.31059	1.87669	0.35647	1.87669	0.56075	1.87669
0.31113	1.87794	0.35345	1.87794	0.55459	1.87794
0.31187	1.87919	0.35053	1.87919	0.54805	1.87919
0.31282	1.88044	0.34773	1.88044	0.54119	1.88044
0.31396	1.88169	0.345	1.88169	0.53394	1.88169
0.31531	1.88294	0.34242	1.88294	0.52633	1.88294
0.31689	1.88419	0.33989	1.88419	0.5183	1.88419
0.31878	1.88544	0.33733	1.88544	0.50981	1.88544
0.32088	1.88669	0.33474	1.88669	0.50077	1.88669
0.32313	1.88794	0.33213	1.88794	0.49119	1.88794
0.32546	1.88919	0.32959	1.88919	0.4812	1.88919
0.32799	1.89044	0.32713	1.89044	0.47088	1.89044
0.33065	1.89169	0.32484	1.89169	0.46035	1.89169
0.3334	1.89294	0.32269	1.89294	0.44977	1.89294
0.33627	1.89419	0.32065	1.89419	0.43926	1.89419
0.33907	1.89544	0.31866	1.89544	0.42893	1.89544
0.34167	1.89669	0.31665	1.89669	0.41885	1.89669
0.34396	1.89794	0.31462	1.89794	0.40911	1.89794
0.34593	1.89919	0.31254	1.89919	0.39984	1.89919
0.34755	1.90044	0.31043	1.90044	0.39121	1.90044
0.34874	1.90169	0.30829	1.90169	0.38334	1.90169
0.34948	1.90294	0.306	1.90294	0.37633	1.90294
0.34971	1.90419	0.30354	1.90419	0.37033	1.90419
0.34945	1.90544	0.3009	1.90544	0.36528	1.90544
0.34863	1.90669	0.29807	1.90669	0.36119	1.90669
0.34726	1.90794	0.29503	1.90794	0.358	1.90794
0.34534	1.90919	0.29177	1.90919	0.35562	1.90919
0.34288	1.91044	0.28826	1.91044	0.35399	1.91044
0.33983	1.91169	0.28452	1.91169	0.35305	1.91169
0.33626	1.91294	0.28056	1.91294	0.35272	1.91294
0.33218	1.91419	0.27635	1.91419	0.35303	1.91419
0.32757	1.91544	0.27187	1.91544	0.35394	1.91544
0.3225	1.91669	0.26713	1.91669	0.35549	1.91669
0.317	1.91794	0.26215	1.91794	0.35753	1.91794
0.31119	1.91919	0.25696	1.91919	0.36002	1.91919
0.30512	1.92044	0.25158	1.92044	0.36282	1.92044
0.29892	1.92169	0.2461	1.92169	0.36595	1.92169
0.29272	1.92294	0.24065	1.92294	0.36938	1.92294
0.28656	1.92419	0.23526	1.92419	0.37307	1.92419
0.28055	1.92544	0.23001	1.92544	0.37695	1.92544
0.27483	1.92669	0.22491	1.92669	0.38098	1.92669
0.26942	1.92794	0.22002	1.92794	0.38522	1.92794
0.26437	1.92919	0.21541	1.92919	0.38961	1.92919
0.2596	1.93044	0.21117	1.93044	0.39422	1.93044
0.25513	1.93169	0.20735	1.93169	0.39906	1.93169
0.25097	1.93294	0.20397	1.93294	0.40404	1.93294
0.24709	1.93419	0.20108	1.93419	0.40916	1.93419
0.24356	1.93544	0.19873	1.93544	0.41441	1.93544
0.24044	1.93669	0.19703	1.93669	0.41982	1.93669
0.23776	1.93794	0.196	1.93794	0.42535	1.93794
0.23551	1.93919	0.19571	1.93919	0.43091	1.93919
0.23371	1.94044	0.19613	1.94044	0.43654	1.94044
0.23243	1.94169	0.1972	1.94169	0.4422	1.94169
0.23167	1.94294	0.19895	1.94294	0.44791	1.94294
0.23148	1.94419	0.20134	1.94419	0.45358	1.94419
0.23187	1.94544	0.20442	1.94544	0.45926	1.94544
0.23285	1.94669	0.2081	1.94669	0.46486	1.94669
0.23436	1.94794	0.21236	1.94794	0.47035	1.94794
0.23632	1.94919	0.21719	1.94919	0.4758	1.94919
0.23883	1.95044	0.2226	1.95044	0.48123	1.95044
0.24185	1.95169	0.22857	1.95169	0.48661	1.95169
0.24535	1.95294	0.23495	1.95294	0.49193	1.95294
0.24913	1.95419	0.24168	1.95419	0.49718	1.95419
0.25315	1.95544	0.24857	1.95544	0.5023	1.95544
0.25734	1.95669	0.25555	1.95669	0.50723	1.95669
0.26153	1.95794	0.26257	1.95794	0.51204	1.95794
0.26569	1.95919	0.26962	1.95919	0.51669	1.95919
0.26983	1.96044	0.27665	1.96044	0.52117	1.96044
0.27392	1.96169	0.28362	1.96169	0.52547	1.96169
0.27795	1.96294	0.29047	1.96294	0.5296	1.96294
0.28188	1.96419	0.29711	1.96419	0.53343	1.96419
0.28567	1.96544	0.30347	1.96544	0.53685	1.96544
0.2893	1.96669	0.30953	1.96669	0.53974	1.96669
0.29271	1.96794	0.31527	1.96794	0.5419	1.96794
0.29588	1.96919	0.32063	1.96919	0.54332	1.96919
0.29879	1.97044	0.3256	1.97044	0.54398	1.97044
0.30141	1.97169	0.33018	1.97169	0.54382	1.97169
0.30374	1.97294	0.33435	1.97294	0.5428	1.97294
0.30579	1.97419	0.33812	1.97419	0.54091	1.97419
0.30756	1.97544	0.34142	1.97544	0.53814	1.97544
0.30908	1.97669	0.34424	1.97669	0.53452	1.97669
0.31042	1.97794	0.3466	1.97794	0.53002	1.97794
0.31163	1.97919	0.34853	1.97919	0.52464	1.97919
0.31274	1.98044	0.35005	1.98044	0.51828	1.98044
0.31376	1.98169	0.35117	1.98169	0.51102	1.98169
0.31466	1.98294	0.35195	1.98294	0.50291	1.98294
0.31548	1.98419	0.35252	1.98419	0.49405	1.98419
0.31623	1.98544	0.35292	1.98544	0.48446	1.98544
0.31684	1.98669	0.35318	1.98669	0.47423	1.98669
0.31731	1.98794	0.35332	1.98794	0.46346	1.98794
0.31761	1.98919	0.35335	1.98919	0.45234	1.98919
0.31767	1.99044	0.35332	1.99044	0.44103	1.99044
0.31752	1.99169	0.35329	1.99169	0.4296	1.99169
0.31713	1.99294	0.35329	1.99294	0.41836	1.99294
0.31651	1.99419	0.35328	1.99419	0.40732	1.99419
0.31569	1.99544	0.35332	1.99544	0.39652	1.99544
0.31466	1.99669	0.35339	1.99669	0.38611	1.99669
0.31347	1.99794	0.3535	1.99794	0.37626	1.99794
0.3121	1.99919	0.35368	1.99919	0.36705	1.99919
0.31051	2.00044	0.35388	2.00044	0.35856	2.00044
0.30869	2.00169	0.35414	2.00169	0.35085	2.00169
0.3067	2.00294	0.35441	2.00294	0.34404	2.00294
0.30452	2.00419	0.35468	2.00419	0.33805	2.00419
0.30212	2.00544	0.355	2.00544	0.33295	2.00544
0.29951	2.00669	0.35531	2.00669	0.32868	2.00669
0.29667	2.00794	0.35558	2.00794	0.32528	2.00794
0.29361	2.00919	0.35575	2.00919	0.32267	2.00919
0.29031	2.01044	0.35579	2.01044	0.32094	2.01044
0.28682	2.01169	0.35571	2.01169	0.32011	2.01169
0.28314	2.01294	0.35549	2.01294	0.32013	2.01294
0.2792	2.01419	0.35508	2.01419	0.32096	2.01419
0.27499	2.01544	0.35441	2.01544	0.32264	2.01544
0.27054	2.01669	0.35352	2.01669	0.32515	2.01669
0.26593	2.01794	0.35239	2.01794	0.32846	2.01794
0.26123	2.01919	0.35106	2.01919	0.33255	2.01919
0.25645	2.02044	0.34955	2.02044	0.33737	2.02044
0.25169	2.02169	0.34788	2.02169	0.34273	2.02169
0.24706	2.02294	0.34601	2.02294	0.34851	2.02294
0.24257	2.02419	0.34399	2.02419	0.35462	2.02419
0.23826	2.02544	0.34182	2.02544	0.36096	2.02544
0.2341	2.02669	0.33951	2.02669	0.36738	2.02669
0.23007	2.02794	0.33706	2.02794	0.3738	2.02794
0.22618	2.02919	0.33454	2.02919	0.38018	2.02919
0.22243	2.03044	0.33198	2.03044	0.38646	2.03044
0.21882	2.03169	0.32942	2.03169	0.39262	2.03169
0.21541	2.03294	0.32695	2.03294	0.39853	2.03294
0.21227	2.03419	0.32459	2.03419	0.40407	2.03419
0.2094	2.03544	0.32232	2.03544	0.4092	2.03544
0.20689	2.03669	0.32014	2.03669	0.4139	2.03669
0.20478	2.03794	0.31805	2.03794	0.41812	2.03794
0.20318	2.03919	0.31608	2.03919	0.42182	2.03919
0.20201	2.04044	0.31423	2.04044	0.42498	2.04044
0.20122	2.04169	0.31255	2.04169	0.42756	2.04169
0.20074	2.04294	0.31102	2.04294	0.42955	2.04294
0.20053	2.04419	0.30971	2.04419	0.43097	2.04419
0.20054	2.04544	0.30867	2.04544	0.43182	2.04544
0.20075	2.04669	0.30792	2.04669	0.43217	2.04669
0.20108	2.04794	0.30741	2.04794	0.43204	2.04794
0.20149	2.04919	0.30711	2.04919	0.43157	2.04919
0.20195	2.05044	0.30702	2.05044	0.43078	2.05044
0.20243	2.05169	0.30713	2.05169	0.42972	2.05169
0.2029	2.05294	0.30748	2.05294	0.42839	2.05294
0.20333	2.05419	0.30807	2.05419	0.4268	2.05419
0.20366	2.05544	0.30889	2.05544	0.42503	2.05544
0.20385	2.05669	0.30987	2.05669	0.42295	2.05669
0.20389	2.05794	0.31104	2.05794	0.42062	2.05794
0.20372	2.05919	0.31238	2.05919	0.41817	2.05919
0.20333	2.06044	0.31393	2.06044	0.41562	2.06044
0.20266	2.06169	0.31569	2.06169	0.41287	2.06169
0.20171	2.06294	0.31759	2.06294	0.40994	2.06294
0.20052	2.06419	0.31963	2.06419	0.40678	2.06419
0.19908	2.06544	0.32173	2.06544	0.40345	2.06544
0.19733	2.06669	0.32383	2.06669	0.39992	2.06669
0.19531	2.06794	0.32593	2.06794	0.39634	2.06794
0.19314	2.06919	0.32791	2.06919	0.39269	2.06919
0.19085	2.07044	0.32981	2.07044	0.38907	2.07044
0.18848	2.07169	0.33158	2.07169	0.3855	2.07169
0.18604	2.07294	0.33318	2.07294	0.38206	2.07294
0.18365	2.07419	0.33461	2.07419	0.37874	2.07419
0.18134	2.07544	0.33587	2.07544	0.37555	2.07544
0.17921	2.07669	0.33691	2.07669	0.37251	2.07669
0.17739	2.07794	0.33772	2.07794	0.36969	2.07794
0.17596	2.07919	0.33831	2.07919	0.36704	2.07919
0.17497	2.08044	0.33863	2.08044	0.36455	2.08044
0.17444	2.08169	0.33869	2.08169	0.36217	2.08169
0.17435	2.08294	0.33852	2.08294	0.3599	2.08294
0.17474	2.08419	0.33811	2.08419	0.35779	2.08419
0.17562	2.08544	0.33747	2.08544	0.35586	2.08544
0.17693	2.08669	0.33667	2.08669	0.35418	2.08669
0.17867	2.08794	0.33563	2.08794	0.35272	2.08794
0.18085	2.08919	0.33436	2.08919	0.35148	2.08919
0.18353	2.09044	0.33294	2.09044	0.35042	2.09044
0.18676	2.09169	0.3314	2.09169	0.34951	2.09169
0.19054	2.09294	0.32974	2.09294	0.34871	2.09294
0.1949	2.09419	0.3279	2.09419	0.34796	2.09419
0.19993	2.09544	0.32586	2.09544	0.34722	2.09544
0.20559	2.09669	0.32357	2.09669	0.34648	2.09669
0.21185	2.09794	0.32094	2.09794	0.34578	2.09794
0.21876	2.09919	0.318	2.09919	0.34512	2.09919
0.22621	2.10044	0.31474	2.10044	0.34442	2.10044
0.23411	2.10169	0.31117	2.10169	0.34373	2.10169
0.24224	2.10294	0.30731	2.10294	0.34302	2.10294
0.25061	2.10419	0.30322	2.10419	0.34227	2.10419
0.25912	2.10544	0.29894	2.10544	0.34152	2.10544
0.26773	2.10669	0.29449	2.10669	0.34076	2.10669
0.27635	2.10794	0.28993	2.10794	0.34	2.10794
0.28493	2.10919	0.28529	2.10919	0.33925	2.10919
0.29337	2.11044	0.28059	2.11044	0.33847	2.11044
0.30165	2.11169	0.27589	2.11169	0.33765	2.11169
0.30976	2.11294	0.27123	2.11294	0.33667	2.11294
0.31762	2.11419	0.26665	2.11419	0.33554	2.11419
0.32514	2.11544	0.26218	2.11544	0.33427	2.11544
0.33232	2.11669	0.25784	2.11669	0.33286	2.11669
0.3391	2.11794	0.25361	2.11794	0.33132	2.11794
0.34547	2.11919	0.24956	2.11919	0.32963	2.11919
0.35137	2.12044	0.2457	2.12044	0.32785	2.12044
0.35676	2.12169	0.24206	2.12169	0.32599	2.12169
0.36162	2.12294	0.23866	2.12294	0.32397	2.12294
0.36598	2.12419	0.23543	2.12419	0.32181	2.12419
0.36989	2.12544	0.23232	2.12544	0.31954	2.12544
0.37336	2.12669	0.22939	2.12669	0.31719	2.12669
0.37636	2.12794	0.22661	2.12794	0.31483	2.12794
0.37891	2.12919	0.22393	2.12919	0.31245	2.12919
0.38114	2.13044	0.2214	2.13044	0.31004	2.13044
0.38305	2.13169	0.21896	2.13169	0.30751	2.13169
0.38457	2.13294	0.21662	2.13294	0.30487	2.13294
0.38575	2.13419	0.21435	2.13419	0.30208	2.13419
0.38659	2.13544	0.2122	2.13544	0.29916	2.13544
0.38719	2.13669	0.21023	2.13669	0.29612	2.13669
0.38751	2.13794	0.20841	2.13794	0.29299	2.13794
0.38756	2.13919	0.20671	2.13919	0.2898	2.13919
0.38731	2.14044	0.20512	2.14044	0.28659	2.14044
0.38671	2.14169	0.20364	2.14169	0.2833	2.14169
0.3857	2.14294	0.20228	2.14294	0.27996	2.14294
0.38425	2.14419	0.20104	2.14419	0.27664	2.14419
0.38242	2.14544	0.1999	2.14544	0.27336	2.14544
0.38027	2.14669	0.19883	2.14669	0.27015	2.14669
0.37781	2.14794	0.19783	2.14794	0.26691	2.14794
0.37506	2.14919	0.19689	2.14919	0.26365	2.14919
0.3721	2.15044	0.19595	2.15044	0.26029	2.15044
0.36899	2.15169	0.19502	2.15169	0.25684	2.15169
0.36574	2.15294	0.19417	2.15294	0.25327	2.15294
0.36232	2.15419	0.19331	2.15419	0.24961	2.15419
0.35875	2.15544	0.19239	2.15544	0.24589	2.15544
0.35506	2.15669	0.19136	2.15669	0.24215	2.15669
0.35131	2.15794	0.19026	2.15794	0.23839	2.15794
0.34744	2.15919	0.18909	2.15919	0.23468	2.15919
0.34349	2.16044	0.18788	2.16044	0.23105	2.16044
0.33943	2.16169	0.18669	2.16169	0.22754	2.16169
0.3352	2.16294	0.18557	2.16294	0.22418	2.16294
0.33079	2.16419	0.18457	2.16419	0.22105	2.16419
0.32622	2.16544	0.18376	2.16544	0.21812	2.16544
0.3216	2.16669	0.18316	2.16669	0.21541	2.16669
0.3169	2.16793	0.18279	2.16793	0.21298	2.16793
0.31215	2.16919	0.1827	2.16919	0.21076	2.16919
0.30737	2.17043	0.18294	2.17043	0.20873	2.17043
0.30263	2.17168	0.18352	2.17168	0.20689	2.17168
0.29798	2.17293	0.18442	2.17293	0.20527	2.17293
0.29349	2.17418	0.18565	2.17418	0.20384	2.17418
0.28919	2.17543	0.18719	2.17543	0.2026	2.17543
0.28506	2.17668	0.18903	2.17668	0.20162	2.17668
0.28113	2.17793	0.19121	2.17793	0.20091	2.17793
0.27747	2.17918	0.1937	2.17918	0.20047	2.17918
0.27402	2.18043	0.19651	2.18043	0.20029	2.18043
0.27083	2.18168	0.19971	2.18168	0.20035	2.18168
0.26787	2.18293	0.20323	2.18293	0.20063	2.18293
0.26523	2.18418	0.20708	2.18418	0.20111	2.18418
0.26296	2.18543	0.21119	2.18543	0.2018	2.18543
0.26105	2.18668	0.21552	2.18668	0.20272	2.18668
0.25947	2.18793	0.2201	2.18793	0.2038	2.18793
0.25813	2.18918	0.22492	2.18918	0.20503	2.18918
0.25701	2.19043	0.22988	2.19043	0.20644	2.19043
0.25607	2.19168	0.23496	2.19168	0.20791	2.19168
0.25531	2.19293	0.24025	2.19293	0.20943	2.19293
0.2546	2.19418	0.24571	2.19418	0.21099	2.19418
0.25388	2.19543	0.2514	2.19543	0.21262	2.19543
0.25315	2.19668	0.25738	2.19668	0.21432	2.19668
0.25233	2.19793	0.26364	2.19793	0.21615	2.19793
0.25142	2.19918	0.27008	2.19918	0.21809	2.19918
0.25028	2.20043	0.27659	2.20043	0.22015	2.20043
0.24891	2.20168	0.28312	2.20168	0.22228	2.20168
0.24723	2.20293	0.28961	2.20293	0.22442	2.20293
0.24522	2.20418	0.29606	2.20418	0.22656	2.20418
0.24287	2.20543	0.30238	2.20543	0.22875	2.20543
0.24029	2.20668	0.3085	2.20668	0.23097	2.20668
0.23749	2.20793	0.31432	2.20793	0.23312	2.20793
0.23443	2.20918	0.31984	2.20918	0.23515	2.20918
0.23106	2.21043	0.32501	2.21043	0.23701	2.21043
0.22739	2.21168	0.3298	2.21168	0.23878	2.21168
0.22346	2.21293	0.33415	2.21293	0.24044	2.21293
0.21925	2.21418	0.33803	2.21418	0.24202	2.21418
0.21473	2.21543	0.34145	2.21543	0.24352	2.21543
0.20994	2.21668	0.34429	2.21668	0.24498	2.21668
0.20492	2.21793	0.34651	2.21793	0.2464	2.21793
0.19972	2.21918	0.34811	2.21918	0.24776	2.21918
0.19437	2.22043	0.34915	2.22043	0.24905	2.22043
0.18886	2.22168	0.3496	2.22168	0.25034	2.22168
0.18328	2.22293	0.34946	2.22293	0.2516	2.22293
0.17762	2.22418	0.34872	2.22418	0.25285	2.22418
0.17199	2.22543	0.34739	2.22543	0.25405	2.22543
0.16649	2.22668	0.34546	2.22668	0.25517	2.22668
0.1612	2.22793	0.34297	2.22793	0.25614	2.22793
0.15618	2.22918	0.3399	2.22918	0.25694	2.22918
0.15146	2.23043	0.33631	2.23043	0.25757	2.23043
0.14713	2.23168	0.33222	2.23168	0.25794	2.23168
0.14328	2.23293	0.32766	2.23293	0.25809	2.23293
0.13999	2.23418	0.32259	2.23418	0.25801	2.23418
0.13727	2.23543	0.31706	2.23543	0.25776	2.23543
0.13514	2.23668	0.31113	2.23668	0.25731	2.23668
0.13358	2.23793	0.30484	2.23793	0.25675	2.23793
0.13262	2.23918	0.29828	2.23918	0.25616	2.23918
0.13228	2.24043	0.29149	2.24043	0.25557	2.24043
0.13253	2.24168	0.28451	2.24168	0.25496	2.24168
0.13336	2.24293	0.27743	2.24293	0.25434	2.24293
0.13481	2.24418	0.27029	2.24418	0.25382	2.24418
0.13681	2.24543	0.26307	2.24543	0.25346	2.24543
0.13936	2.24668	0.25588	2.24668	0.25332	2.24668
0.14231	2.24793	0.24875	2.24793	0.25341	2.24793
0.14554	2.24918	0.2418	2.24918	0.25371	2.24918
0.14895	2.25043	0.23512	2.25043	0.25419	2.25043
0.15248	2.25168	0.22876	2.25168	0.2549	2.25168
0.15607	2.25293	0.22283	2.25293	0.25586	2.25293
0.15968	2.25418	0.21746	2.25418	0.25698	2.25418
0.16323	2.25543	0.21281	2.25543	0.25827	2.25543
0.16669	2.25668	0.20884	2.25668	0.25972	2.25668
0.17	2.25793	0.20562	2.25793	0.2613	2.25793
0.17312	2.25918	0.20309	2.25918	0.26301	2.25918
0.17602	2.26043	0.20113	2.26043	0.26486	2.26043
0.17868	2.26168	0.19977	2.26168	0.26677	2.26168
0.18102	2.26293	0.19899	2.26293	0.26872	2.26293
0.18305	2.26418	0.19876	2.26418	0.27064	2.26418
0.18475	2.26543	0.19906	2.26543	0.27252	2.26543
0.18617	2.26668	0.19986	2.26668	0.2744	2.26668
0.18732	2.26793	0.20105	2.26793	0.27622	2.26793
0.18824	2.26918	0.20257	2.26918	0.27788	2.26918
0.18886	2.27043	0.20439	2.27043	0.27935	2.27043
0.18917	2.27168	0.20647	2.27168	0.28071	2.27168
0.18919	2.27293	0.20877	2.27293	0.282	2.27293
0.18902	2.27418	0.21121	2.27418	0.28324	2.27418
0.18867	2.27543	0.21373	2.27543	0.28435	2.27543
0.18815	2.27668	0.21626	2.27668	0.28534	2.27668
0.1875	2.27793	0.21875	2.27793	0.28621	2.27793
0.1868	2.27918	0.22109	2.27918	0.28698	2.27918
0.18607	2.28043	0.22327	2.28043	0.2876	2.28043
0.18541	2.28168	0.22527	2.28168	0.28809	2.28168
0.18489	2.28293	0.22706	2.28293	0.28846	2.28293
0.18455	2.28418	0.22855	2.28418	0.28872	2.28418
0.18448	2.28543	0.22972	2.28543	0.28885	2.28543
0.1847	2.28668	0.23056	2.28668	0.28889	2.28668
0.18532	2.28793	0.2311	2.28793	0.28881	2.28793
0.18631	2.28918	0.23132	2.28918	0.28864	2.28918
0.18767	2.29043	0.23124	2.29043	0.2884	2.29043
0.18942	2.29168	0.23081	2.29168	0.28815	2.29168
0.1916	2.29293	0.23007	2.29293	0.28796	2.29293
0.19421	2.29418	0.22896	2.29418	0.28791	2.29418
0.19726	2.29543	0.22746	2.29543	0.2881	2.29543
0.2007	2.29668	0.22559	2.29668	0.2886	2.29668
0.20449	2.29793	0.22336	2.29793	0.28961	2.29793
0.20858	2.29918	0.22078	2.29918	0.29117	2.29918
0.21297	2.30043	0.21784	2.30043	0.29335	2.30043
0.21766	2.30168	0.21457	2.30168	0.2961	2.30168
0.22259	2.30293	0.21094	2.30293	0.29946	2.30293
0.22772	2.30418	0.20704	2.30418	0.30335	2.30418
0.23299	2.30543	0.20289	2.30543	0.30783	2.30543
0.23834	2.30668	0.19854	2.30668	0.31287	2.30668
0.24364	2.30793	0.19402	2.30793	0.31833	2.30793
0.24883	2.30918	0.18943	2.30918	0.32409	2.30918
0.25379	2.31043	0.18484	2.31043	0.33002	2.31043
0.25848	2.31168	0.18032	2.31168	0.33606	2.31168
0.26294	2.31293	0.1759	2.31293	0.34211	2.31293
0.26718	2.31418	0.17166	2.31418	0.34809	2.31418
0.2712	2.31543	0.16767	2.31543	0.3539	2.31543
0.27497	2.31668	0.16396	2.31668	0.35939	2.31668
0.27842	2.31793	0.16051	2.31793	0.36447	2.31793
0.28152	2.31918	0.1573	2.31918	0.36907	2.31918
0.28419	2.32043	0.15437	2.32043	0.37308	2.32043
0.28639	2.32168	0.15165	2.32168	0.3765	2.32168
0.28807	2.32293	0.14918	2.32293	0.37923	2.32293
0.28919	2.32418	0.14703	2.32418	0.38116	2.32418
0.28972	2.32543	0.1451	2.32543	0.38226	2.32543
0.28967	2.32668	0.14336	2.32668	0.38246	2.32668
0.28908	2.32793	0.14179	2.32793	0.38176	2.32793
0.28794	2.32918	0.14036	2.32918	0.38014	2.32918
0.28621	2.33043	0.13906	2.33043	0.37755	2.33043
0.28391	2.33168	0.13791	2.33168	0.37402	2.33168
0.28106	2.33293	0.1369	2.33293	0.36961	2.33293
0.27769	2.33418	0.13605	2.33418	0.36438	2.33418
0.27382	2.33543	0.13538	2.33543	0.35831	2.33543
0.26947	2.33668	0.13481	2.33668	0.35147	2.33668
0.26466	2.33793	0.13433	2.33793	0.34391	2.33793
0.25941	2.33918	0.13392	2.33918	0.33575	2.33918
0.25375	2.34043	0.13362	2.34043	0.32705	2.34043
0.24772	2.34168	0.13341	2.34168	0.31788	2.34168
0.24136	2.34293	0.13334	2.34293	0.30833	2.34293
0.23474	2.34418	0.1334	2.34418	0.29853	2.34418
0.22786	2.34543	0.13358	2.34543	0.2886	2.34543
0.22076	2.34668	0.13389	2.34668	0.27869	2.34668
0.21348	2.34793	0.13432	2.34793	0.26894	2.34793
0.20602	2.34918	0.13485	2.34918	0.25947	2.34918
0.19846	2.35043	0.13548	2.35043	0.25034	2.35043
0.19076	2.35168	0.13612	2.35168	0.2417	2.35168
0.18298	2.35293	0.13679	2.35293	0.23369	2.35293
0.1752	2.35418	0.13741	2.35418	0.22642	2.35418
0.16746	2.35543	0.13796	2.35543	0.22003	2.35543
0.15982	2.35668	0.13839	2.35668	0.2146	2.35668
0.15232	2.35793	0.13869	2.35793	0.21015	2.35793
0.14499	2.35918	0.13884	2.35918	0.20678	2.35918
0.13787	2.36043	0.13879	2.36043	0.20452	2.36043
0.13107	2.36168	0.13855	2.36168	0.20323	2.36168
0.12469	2.36293	0.13816	2.36293	0.20286	2.36293
0.11876	2.36418	0.13765	2.36418	0.20342	2.36418
0.11331	2.36543	0.13703	2.36543	0.20486	2.36543
0.10837	2.36668	0.13639	2.36668	0.20705	2.36668
0.10393	2.36793	0.1357	2.36793	0.20994	2.36793
0.10003	2.36918	0.13499	2.36918	0.21337	2.36918
0.09672	2.37043	0.13434	2.37043	0.21724	2.37043
0.09405	2.37168	0.13379	2.37168	0.22149	2.37168
0.09211	2.37293	0.13338	2.37293	0.22608	2.37293
0.09097	2.37418	0.13314	2.37418	0.23096	2.37418
0.09069	2.37543	0.13312	2.37543	0.23598	2.37543
0.09118	2.37668	0.13335	2.37668	0.24102	2.37668
0.09239	2.37793	0.13389	2.37793	0.24596	2.37793
0.09423	2.37918	0.13473	2.37918	0.25064	2.37918
0.09662	2.38043	0.13592	2.38043	0.25498	2.38043
0.09953	2.38168	0.13745	2.38168	0.25888	2.38168
0.10292	2.38293	0.13933	2.38293	0.26228	2.38293
0.10676	2.38418	0.14155	2.38418	0.26515	2.38418
0.11101	2.38543	0.14417	2.38543	0.26735	2.38543
0.11568	2.38668	0.14714	2.38668	0.26882	2.38668
0.12078	2.38793	0.15042	2.38793	0.26951	2.38793
0.12623	2.38918	0.15408	2.38918	0.26938	2.38918
0.132	2.39043	0.15819	2.39043	0.26841	2.39043
0.13802	2.39168	0.16275	2.39168	0.26659	2.39168
0.14425	2.39293	0.16784	2.39293	0.26391	2.39293
0.1507	2.39418	0.17342	2.39418	0.2604	2.39418
0.15731	2.39543	0.17946	2.39543	0.25608	2.39543
0.16398	2.39668	0.18594	2.39668	0.25104	2.39668
0.17065	2.39793	0.1928	2.39793	0.24532	2.39793
0.17731	2.39918	0.19996	2.39918	0.239	2.39918
0.1839	2.40043	0.20748	2.40043	0.23209	2.40043
0.19035	2.40168	0.21531	2.40168	0.22466	2.40168
0.1966	2.40293	0.22343	2.40293	0.21677	2.40293
0.20264	2.40418	0.23176	2.40418	0.20853	2.40418
0.20854	2.40543	0.2402	2.40543	0.20006	2.40543
0.21422	2.40668	0.24864	2.40668	0.19152	2.40668
0.21963	2.40793	0.25701	2.40793	0.18295	2.40793
0.22477	2.40918	0.26523	2.40918	0.17446	2.40918
0.22956	2.41043	0.27318	2.41043	0.16611	2.41043
0.23397	2.41168	0.28077	2.41168	0.15795	2.41168
0.23796	2.41293	0.28798	2.41293	0.15011	2.41293
0.24149	2.41418	0.29471	2.41418	0.14271	2.41418
0.24461	2.41543	0.30089	2.41543	0.1358	2.41543
0.24729	2.41668	0.30644	2.41668	0.12941	2.41668
0.24955	2.41793	0.31134	2.41793	0.1236	2.41793
0.25136	2.41918	0.31554	2.41918	0.11838	2.41918
0.25275	2.42043	0.31901	2.42043	0.1138	2.42043
0.25374	2.42168	0.32175	2.42168	0.1099	2.42168
0.25436	2.42293	0.32376	2.42293	0.10668	2.42293
0.25467	2.42418	0.32512	2.42418	0.10413	2.42418
0.25466	2.42543	0.32584	2.42543	0.10232	2.42543
0.25429	2.42668	0.3259	2.42668	0.10126	2.42668
0.25364	2.42793	0.32531	2.42793	0.10086	2.42793
0.25267	2.42918	0.32407	2.42918	0.1011	2.42918
0.25143	2.43043	0.32221	2.43043	0.10198	2.43043
0.25001	2.43168	0.31978	2.43168	0.10346	2.43168
0.24848	2.43293	0.31686	2.43293	0.10554	2.43293
0.24684	2.43418	0.31345	2.43418	0.10825	2.43418
0.24507	2.43543	0.30958	2.43543	0.11154	2.43543
0.24314	2.43668	0.3053	2.43668	0.11533	2.43668
0.24103	2.43793	0.30064	2.43793	0.11946	2.43793
0.23868	2.43918	0.29562	2.43918	0.12388	2.43918
0.23614	2.44043	0.29033	2.44043	0.12851	2.44043
0.23343	2.44168	0.28478	2.44168	0.13327	2.44168
0.23055	2.44293	0.27902	2.44293	0.13815	2.44293
0.22755	2.44418	0.27306	2.44418	0.14315	2.44418
0.22449	2.44543	0.267	2.44543	0.1482	2.44543
0.22135	2.44668	0.2609	2.44668	0.15325	2.44668
0.21815	2.44793	0.25482	2.44793	0.15816	2.44793
0.21493	2.44918	0.24882	2.44918	0.16291	2.44918
0.21165	2.45043	0.24298	2.45043	0.16745	2.45043
0.20829	2.45168	0.2374	2.45168	0.17174	2.45168
0.20491	2.45293	0.2321	2.45293	0.17575	2.45293
0.20151	2.45418	0.22704	2.45418	0.17946	2.45418
0.19814	2.45543	0.22225	2.45543	0.18284	2.45543
0.19482	2.45668	0.21767	2.45668	0.18589	2.45668
0.19146	2.45793	0.21334	2.45793	0.1886	2.45793
0.18809	2.45918	0.20928	2.45918	0.19099	2.45918
0.18476	2.46043	0.20546	2.46043	0.19302	2.46043
0.18148	2.46168	0.20192	2.46168	0.19471	2.46168
0.17821	2.46293	0.19866	2.46293	0.19605	2.46293
0.17497	2.46418	0.19563	2.46418	0.19713	2.46418
0.17177	2.46543	0.19278	2.46543	0.19807	2.46543
0.16864	2.46668	0.19005	2.46668	0.19892	2.46668
0.16558	2.46793	0.18742	2.46793	0.19969	2.46793
0.16247	2.46918	0.18488	2.46918	0.20038	2.46918
0.1593	2.47043	0.18244	2.47043	0.20101	2.47043
0.15605	2.47168	0.18005	2.47168	0.2016	2.47168
0.15269	2.47293	0.17773	2.47293	0.20225	2.47293
0.14924	2.47418	0.17547	2.47418	0.20292	2.47418
0.14569	2.47543	0.17326	2.47543	0.20363	2.47543
0.14209	2.47668	0.17106	2.47668	0.20438	2.47668
0.13844	2.47793	0.16891	2.47793	0.20513	2.47793
0.13475	2.47918	0.16686	2.47918	0.20588	2.47918
0.13104	2.48043	0.16493	2.48043	0.20671	2.48043
0.12734	2.48168	0.16313	2.48168	0.20761	2.48168
0.12373	2.48293	0.16146	2.48293	0.20855	2.48293
0.12021	2.48418	0.15993	2.48418	0.20955	2.48418
0.11682	2.48543	0.15857	2.48543	0.21061	2.48543
0.11359	2.48668	0.15733	2.48668	0.21176	2.48668
0.11053	2.48793	0.15618	2.48793	0.21295	2.48793
0.10769	2.48918	0.15504	2.48918	0.21413	2.48918
0.10515	2.49043	0.15393	2.49043	0.21529	2.49043
0.10289	2.49168	0.15282	2.49168	0.21645	2.49168
0.10101	2.49293	0.15177	2.49293	0.21764	2.49293
0.09951	2.49418	0.15071	2.49418	0.21887	2.49418
0.09838	2.49543	0.14962	2.49543	0.22019	2.49543
0.09758	2.49668	0.14847	2.49668	0.22159	2.49668
0.0971	2.49793	0.14724	2.49793	0.22301	2.49793
0.09702	2.49918	0.14592	2.49918	0.22438	2.49918
[truncated: 2,003 more rows]
