# Supplementary material for: The impacts of moisture transport on drifting snow sublimation in the saltation layer
Source: Copernicus journal article supplement (doi:10.5194/acp-16-7523-2016), 2016-06-20
Supplement: Supplementary file [file acp-16-7523-2016-supplement-title-page.pdf › acp-16-7523-2016-supplement-title-page.pdf]

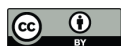

## *Supplement of*

# **The impacts of moisture transport on drifting snow sublimation in the saltation layer**

**Ning Huang et al.**

*Correspondence to:* Ning Huang ([huangn@lzu.edu.cn](mailto:huangn@lzu.edu.cn))

- [acp-16-7523-2016-supplement-title-page.pdf](#)
- Data\_Supplement of The impacts of moisture transport on drifting snow sublimation in the saltation layer
  - Data in Figure 1.xlsx
  - Data in Figure 2.xlsx
  - Data in Figure 3.xlsx
  - Data in Figure 4.xlsx

The copyright of individual parts of the supplement might differ from the CC-BY 3.0 licence.
